# Supplementary material for: Impact of storage and extraction methods on peat soil microbiomes
Source: PeerJ journal article supplement (doi:10.7717/peerj.18745), 2024-12-23
Supplement: TableS1.xlsx [file TableS1.xlsx]

## Sheet: Table S1
Table S1: Sample Metadata
sample_name	sample_title	collection_date	depth	lat_lon	ph	brief description
Garnello.201607_AJP_1_10to14.LG_SL_1	Garnello.201607_AJP_1_10to14.LG_SL_1 (alternate names: MC P-10-14 LG-SL-1, SB6422_J1514)	2016-07-20	0.10-0.14 meter	68.354513 N 19.046747 E		SAMPLE COLLECTION: ~12 ml of LifeGuard buffer (Qiagen) (LG) was added to the tube, followed by vigorous hand shaking to achieve a thorough mixture of LG and peat. NUCLEIC ACID EXTRACTION: Standard with LG spin down (SL) - Identical to the 'S' method, except that peat materials stored in LG were centrifuged at 4,700 xg for 5 min to separate peat from LG, which was removed before adding the peat ma…
Garnello.201607_AJP_1_10to14.LG_SL_2	Garnello.201607_AJP_1_10to14.LG_SL_2 (alternate names: MC P-10-14 LG-SL-2, SB6423_J1514)	2016-07-20	0.10-0.14 meter	68.354513 N 19.046747 E		SAMPLE COLLECTION: ~12 ml of LifeGuard buffer (Qiagen) (LG) was added to the tube, followed by vigorous hand shaking to achieve a thorough mixture of LG and peat. NUCLEIC ACID EXTRACTION: Standard with LG spin down (SL) - Identical to the 'S' method, except that peat materials stored in LG were centrifuged at 4,700 xg for 5 min to separate peat from LG, which was removed before adding the peat ma…
Garnello.201607_AJP_1_10to14.LG_SL_3	Garnello.201607_AJP_1_10to14.LG_SL_3 (alternate names: MC P-10-14 LG-SL-3, SB6424_J1514)	2016-07-20	0.10-0.14 meter	68.354513 N 19.046747 E		SAMPLE COLLECTION: ~12 ml of LifeGuard buffer (Qiagen) (LG) was added to the tube, followed by vigorous hand shaking to achieve a thorough mixture of LG and peat. NUCLEIC ACID EXTRACTION: Standard with LG spin down (SL) - Identical to the 'S' method, except that peat materials stored in LG were centrifuged at 4,700 xg for 5 min to separate peat from LG, which was removed before adding the peat ma…
Garnello.201607_AJP_1_30to34.LG_SL_1	Garnello.201607_AJP_1_30to34.LG_SL_1 (alternate names: MC P-30-34 LG-SL-1, SB6428_J1514)	2016-07-20	0.30-0.34 meter	68.354513 N 19.046747 E		SAMPLE COLLECTION: ~12 ml of LifeGuard buffer (Qiagen) (LG) was added to the tube, followed by vigorous hand shaking to achieve a thorough mixture of LG and peat. NUCLEIC ACID EXTRACTION: Standard with LG spin down (SL) - Identical to the 'S' method, except that peat materials stored in LG were centrifuged at 4,700 xg for 5 min to separate peat from LG, which was removed before adding the peat ma…
Garnello.201607_AJP_1_30to34.LG_SL_2	Garnello.201607_AJP_1_30to34.LG_SL_2 (alternate names: MC P-30-34 LG-SL-2, SB6429_J1514)	2016-07-20	0.30-0.34 meter	68.354513 N 19.046747 E		SAMPLE COLLECTION: ~12 ml of LifeGuard buffer (Qiagen) (LG) was added to the tube, followed by vigorous hand shaking to achieve a thorough mixture of LG and peat. NUCLEIC ACID EXTRACTION: Standard with LG spin down (SL) - Identical to the 'S' method, except that peat materials stored in LG were centrifuged at 4,700 xg for 5 min to separate peat from LG, which was removed before adding the peat ma…
Garnello.201607_AJP_1_30to34.LG_SL_3	Garnello.201607_AJP_1_30to34.LG_SL_3 (alternate names: MC P-30-34 LG-SL-3, SB6430_J1514)	2016-07-20	0.30-0.34 meter	68.354513 N 19.046747 E		SAMPLE COLLECTION: ~12 ml of LifeGuard buffer (Qiagen) (LG) was added to the tube, followed by vigorous hand shaking to achieve a thorough mixture of LG and peat. NUCLEIC ACID EXTRACTION: Standard with LG spin down (SL) - Identical to the 'S' method, except that peat materials stored in LG were centrifuged at 4,700 xg for 5 min to separate peat from LG, which was removed before adding the peat ma…
Garnello.201607_AJS_1_10to14.LG_SL_1	Garnello.201607_AJS_1_10to14.LG_SL_1 (alternate names: MC S-10-14 LG-SL-1, SB6434_J1514)	2016-07-20	0.10-0.14 meter	68.354438 N 19.046693 E	5	SAMPLE COLLECTION: ~12 ml of LifeGuard buffer (Qiagen) (LG) was added to the tube, followed by vigorous hand shaking to achieve a thorough mixture of LG and peat. NUCLEIC ACID EXTRACTION: Standard with LG spin down (SL) - Identical to the 'S' method, except that peat materials stored in LG were centrifuged at 4,700 xg for 5 min to separate peat from LG, which was removed before adding the peat ma…
Garnello.201607_AJS_1_10to14.LG_SL_2	Garnello.201607_AJS_1_10to14.LG_SL_2 (alternate names: MC S-10-14 LG-SL-2, SB6435_J1514)	2016-07-20	0.10-0.14 meter	68.354438 N 19.046693 E	5	SAMPLE COLLECTION: ~12 ml of LifeGuard buffer (Qiagen) (LG) was added to the tube, followed by vigorous hand shaking to achieve a thorough mixture of LG and peat. NUCLEIC ACID EXTRACTION: Standard with LG spin down (SL) - Identical to the 'S' method, except that peat materials stored in LG were centrifuged at 4,700 xg for 5 min to separate peat from LG, which was removed before adding the peat ma…
Garnello.201607_AJS_1_10to14.LG_SL_3	Garnello.201607_AJS_1_10to14.LG_SL_3 (alternate names: MC S-10-14 LG-SL-3, SB6436_J1514)	2016-07-20	0.10-0.14 meter	68.354438 N 19.046693 E	5	SAMPLE COLLECTION: ~12 ml of LifeGuard buffer (Qiagen) (LG) was added to the tube, followed by vigorous hand shaking to achieve a thorough mixture of LG and peat. NUCLEIC ACID EXTRACTION: Standard with LG spin down (SL) - Identical to the 'S' method, except that peat materials stored in LG were centrifuged at 4,700 xg for 5 min to separate peat from LG, which was removed before adding the peat ma…
Garnello.201607_AJS_1_30to34.LG_SL_1	Garnello.201607_AJS_1_30to34.LG_SL_1 (alternate names: MC S-30-34 LG-SL-1, SB6440_J1514)	2016-07-20	0.30-0.34 meter	68.354438 N 19.046693 E	5.7	SAMPLE COLLECTION: ~12 ml of LifeGuard buffer (Qiagen) (LG) was added to the tube, followed by vigorous hand shaking to achieve a thorough mixture of LG and peat. NUCLEIC ACID EXTRACTION: Standard with LG spin down (SL) - Identical to the 'S' method, except that peat materials stored in LG were centrifuged at 4,700 xg for 5 min to separate peat from LG, which was removed before adding the peat ma…
Garnello.201607_AJS_1_30to34.LG_SL_2	Garnello.201607_AJS_1_30to34.LG_SL_2 (alternate names: MC S-30-34 LG-SL-2, SB6441_J1514)	2016-07-20	0.30-0.34 meter	68.354438 N 19.046693 E	5.7	SAMPLE COLLECTION: ~12 ml of LifeGuard buffer (Qiagen) (LG) was added to the tube, followed by vigorous hand shaking to achieve a thorough mixture of LG and peat. NUCLEIC ACID EXTRACTION: Standard with LG spin down (SL) - Identical to the 'S' method, except that peat materials stored in LG were centrifuged at 4,700 xg for 5 min to separate peat from LG, which was removed before adding the peat ma…
Garnello.201607_AJS_1_30to34.LG_SL_3	Garnello.201607_AJS_1_30to34.LG_SL_3 (alternate names: MC S-30-34 LG-SL-3, SB6442_J1514)	2016-07-20	0.30-0.34 meter	68.354438 N 19.046693 E	5.7	SAMPLE COLLECTION: ~12 ml of LifeGuard buffer (Qiagen) (LG) was added to the tube, followed by vigorous hand shaking to achieve a thorough mixture of LG and peat. NUCLEIC ACID EXTRACTION: Standard with LG spin down (SL) - Identical to the 'S' method, except that peat materials stored in LG were centrifuged at 4,700 xg for 5 min to separate peat from LG, which was removed before adding the peat ma…
Garnello.201607_AJE_1_10to14.LG_SL_1	Garnello.201607_AJE_1_10to14.LG_SL_1 (alternate names: MC E-10-14 LG-SL-1, SB6446_J1514)	2016-07-20	0.10-0.14 meter	68.354433 N 19.046598 E	5	SAMPLE COLLECTION: ~12 ml of LifeGuard buffer (Qiagen) (LG) was added to the tube, followed by vigorous hand shaking to achieve a thorough mixture of LG and peat. NUCLEIC ACID EXTRACTION: Standard with LG spin down (SL) - Identical to the 'S' method, except that peat materials stored in LG were centrifuged at 4,700 xg for 5 min to separate peat from LG, which was removed before adding the peat ma…
Garnello.201607_AJE_1_10to14.LG_SL_2	Garnello.201607_AJE_1_10to14.LG_SL_2 (alternate names: MC E-10-14 LG-SL-2, SB6447_J1514)	2016-07-20	0.10-0.14 meter	68.354433 N 19.046598 E	5	SAMPLE COLLECTION: ~12 ml of LifeGuard buffer (Qiagen) (LG) was added to the tube, followed by vigorous hand shaking to achieve a thorough mixture of LG and peat. NUCLEIC ACID EXTRACTION: Standard with LG spin down (SL) - Identical to the 'S' method, except that peat materials stored in LG were centrifuged at 4,700 xg for 5 min to separate peat from LG, which was removed before adding the peat ma…
Garnello.201607_AJE_1_10to14.LG_SL_3	Garnello.201607_AJE_1_10to14.LG_SL_3 (alternate names: MC E-10-14 LG-SL-3, SB6448_J1514)	2016-07-20	0.10-0.14 meter	68.354433 N 19.046598 E	5	SAMPLE COLLECTION: ~12 ml of LifeGuard buffer (Qiagen) (LG) was added to the tube, followed by vigorous hand shaking to achieve a thorough mixture of LG and peat. NUCLEIC ACID EXTRACTION: Standard with LG spin down (SL) - Identical to the 'S' method, except that peat materials stored in LG were centrifuged at 4,700 xg for 5 min to separate peat from LG, which was removed before adding the peat ma…
Garnello.201607_AJE_1_30to34.LG_SL_1	Garnello.201607_AJE_1_30to34.LG_SL_1 (alternate names: MC E-30-34 LG-SL-1, SB6452_J1514)	2016-07-20	0.30-0.34 meter	68.354433 N 19.046598 E	5.3	SAMPLE COLLECTION: ~12 ml of LifeGuard buffer (Qiagen) (LG) was added to the tube, followed by vigorous hand shaking to achieve a thorough mixture of LG and peat. NUCLEIC ACID EXTRACTION: Standard with LG spin down (SL) - Identical to the 'S' method, except that peat materials stored in LG were centrifuged at 4,700 xg for 5 min to separate peat from LG, which was removed before adding the peat ma…
Garnello.201607_AJE_1_30to34.LG_SL_2	Garnello.201607_AJE_1_30to34.LG_SL_2 (alternate names: MC E-30-34 LG-SL-2, SB6453_J1514)	2016-07-20	0.30-0.34 meter	68.354433 N 19.046598 E	5.3	SAMPLE COLLECTION: ~12 ml of LifeGuard buffer (Qiagen) (LG) was added to the tube, followed by vigorous hand shaking to achieve a thorough mixture of LG and peat. NUCLEIC ACID EXTRACTION: Standard with LG spin down (SL) - Identical to the 'S' method, except that peat materials stored in LG were centrifuged at 4,700 xg for 5 min to separate peat from LG, which was removed before adding the peat ma…
Garnello.201607_AJE_1_30to34.LG_SL_3	Garnello.201607_AJE_1_30to34.LG_SL_3 (alternate names: MC E-30-34 LG-SL-3, SB6454_J1514)	2016-07-20	0.30-0.34 meter	68.354433 N 19.046598 E	5.3	SAMPLE COLLECTION: ~12 ml of LifeGuard buffer (Qiagen) (LG) was added to the tube, followed by vigorous hand shaking to achieve a thorough mixture of LG and peat. NUCLEIC ACID EXTRACTION: Standard with LG spin down (SL) - Identical to the 'S' method, except that peat materials stored in LG were centrifuged at 4,700 xg for 5 min to separate peat from LG, which was removed before adding the peat ma…
Garnello.201607_AJP_1_10to14.NA_PSP_1	Garnello.201607_AJP_1_10to14.NA_PSP_1 (alternate names: MC P-10-14 NA-PSP-1, SB4399_J1359)	2016-07-20	0.10-0.14 meter	68.354513 N 19.046747 E		SAMPLE COLLECTION: Sample was placed naked (NA) on ice. NUCLEIC ACID EXTRACTION: DNeasy PowerSoil Kit (Qiagen cat# 12888-100) (PSP) - The manufacturer's protocol was followed for this extraction method.
Garnello.201607_AJP_1_10to14.NA_PSP_2	Garnello.201607_AJP_1_10to14.NA_PSP_2 (alternate names: MC P-10-14 NA-PSP-2, SB4400_J1359)	2016-07-20	0.10-0.14 meter	68.354513 N 19.046747 E		SAMPLE COLLECTION: Sample was placed naked (NA) on ice. NUCLEIC ACID EXTRACTION: DNeasy PowerSoil Kit (Qiagen cat# 12888-100) (PSP) - The manufacturer's protocol was followed for this extraction method.
Garnello.201607_AJP_1_10to14.NA_PSP_3	Garnello.201607_AJP_1_10to14.NA_PSP_3 (alternate names: MC P-10-14 NA-PSP-3, SB4401_J1359)	2016-07-20	0.10-0.14 meter	68.354513 N 19.046747 E		SAMPLE COLLECTION: Sample was placed naked (NA) on ice. NUCLEIC ACID EXTRACTION: DNeasy PowerSoil Kit (Qiagen cat# 12888-100) (PSP) - The manufacturer's protocol was followed for this extraction method.
Garnello.201607_AJP_1_30to34.NA_PSP_1	Garnello.201607_AJP_1_30to34.NA_PSP_1 (alternate names: MC P-30-34 NA-PSP-1, SB4402_J1359)	2016-07-20	0.30-0.34 meter	68.354513 N 19.046747 E		SAMPLE COLLECTION: Sample was placed naked (NA) on ice. NUCLEIC ACID EXTRACTION: DNeasy PowerSoil Kit (Qiagen cat# 12888-100) (PSP) - The manufacturer's protocol was followed for this extraction method.
Garnello.201607_AJP_1_30to34.NA_PSP_2	Garnello.201607_AJP_1_30to34.NA_PSP_2 (alternate names: MC P-30-34 NA-PSP-2, SB4403_J1359)	2016-07-20	0.30-0.34 meter	68.354513 N 19.046747 E		SAMPLE COLLECTION: Sample was placed naked (NA) on ice. NUCLEIC ACID EXTRACTION: DNeasy PowerSoil Kit (Qiagen cat# 12888-100) (PSP) - The manufacturer's protocol was followed for this extraction method.
Garnello.201607_AJP_1_30to34.NA_PSP_3	Garnello.201607_AJP_1_30to34.NA_PSP_3 (alternate names: MC P-30-34 NA-PSP-3, SB4404_J1359)	2016-07-20	0.30-0.34 meter	68.354513 N 19.046747 E		SAMPLE COLLECTION: Sample was placed naked (NA) on ice. NUCLEIC ACID EXTRACTION: DNeasy PowerSoil Kit (Qiagen cat# 12888-100) (PSP) - The manufacturer's protocol was followed for this extraction method.
Garnello.201607_AJS_1_10to14.NA_PSP_1	Garnello.201607_AJS_1_10to14.NA_PSP_1 (alternate names: MC S-10-14 NA-PSP-1, SB4405_J1359)	2016-07-20	0.10-0.14 meter	68.354438 N 19.046693 E	5	SAMPLE COLLECTION: Sample was placed naked (NA) on ice. NUCLEIC ACID EXTRACTION: DNeasy PowerSoil Kit (Qiagen cat# 12888-100) (PSP) - The manufacturer's protocol was followed for this extraction method.
Garnello.201607_AJS_1_10to14.NA_PSP_2	Garnello.201607_AJS_1_10to14.NA_PSP_2 (alternate names: MC S-10-14 NA-PSP-2, SB4406_J1359)	2016-07-20	0.10-0.14 meter	68.354438 N 19.046693 E	5	SAMPLE COLLECTION: Sample was placed naked (NA) on ice. NUCLEIC ACID EXTRACTION: DNeasy PowerSoil Kit (Qiagen cat# 12888-100) (PSP) - The manufacturer's protocol was followed for this extraction method.
Garnello.201607_AJS_1_10to14.NA_PSP_3	Garnello.201607_AJS_1_10to14.NA_PSP_3 (alternate names: MC S-10-14 NA-PSP-3, SB4407_J1359)	2016-07-20	0.10-0.14 meter	68.354438 N 19.046693 E	5	SAMPLE COLLECTION: Sample was placed naked (NA) on ice. NUCLEIC ACID EXTRACTION: DNeasy PowerSoil Kit (Qiagen cat# 12888-100) (PSP) - The manufacturer's protocol was followed for this extraction method.
Garnello.201607_AJS_1_30to34.NA_PSP_1	Garnello.201607_AJS_1_30to34.NA_PSP_1 (alternate names: MC S-30-34 NA-PSP-1, SB4408_J1359)	2016-07-20	0.30-0.34 meter	68.354438 N 19.046693 E	5.7	SAMPLE COLLECTION: Sample was placed naked (NA) on ice. NUCLEIC ACID EXTRACTION: DNeasy PowerSoil Kit (Qiagen cat# 12888-100) (PSP) - The manufacturer's protocol was followed for this extraction method.
Garnello.201607_AJS_1_30to34.NA_PSP_2	Garnello.201607_AJS_1_30to34.NA_PSP_2 (alternate names: MC S-30-34 NA-PSP-2, SB4409_J1359)	2016-07-20	0.30-0.34 meter	68.354438 N 19.046693 E	5.7	SAMPLE COLLECTION: Sample was placed naked (NA) on ice. NUCLEIC ACID EXTRACTION: DNeasy PowerSoil Kit (Qiagen cat# 12888-100) (PSP) - The manufacturer's protocol was followed for this extraction method.
Garnello.201607_AJS_1_30to34.NA_PSP_3	Garnello.201607_AJS_1_30to34.NA_PSP_3 (alternate names: MC S-30-34 NA-PSP-3, SB4410_J1359)	2016-07-20	0.30-0.34 meter	68.354438 N 19.046693 E	5.7	SAMPLE COLLECTION: Sample was placed naked (NA) on ice. NUCLEIC ACID EXTRACTION: DNeasy PowerSoil Kit (Qiagen cat# 12888-100) (PSP) - The manufacturer's protocol was followed for this extraction method.
Garnello.201607_AJE_1_10to14.NA_PSP_1	Garnello.201607_AJE_1_10to14.NA_PSP_1 (alternate names: MC E-10-14 NA-PSP-1, SB4411_J1359)	2016-07-20	0.10-0.14 meter	68.354433 N 19.046598 E	5	SAMPLE COLLECTION: Sample was placed naked (NA) on ice. NUCLEIC ACID EXTRACTION: DNeasy PowerSoil Kit (Qiagen cat# 12888-100) (PSP) - The manufacturer's protocol was followed for this extraction method.
Garnello.201607_AJE_1_10to14.NA_PSP_2	Garnello.201607_AJE_1_10to14.NA_PSP_2 (alternate names: MC E-10-14 NA-PSP-2, SB4412_J1359)	2016-07-20	0.10-0.14 meter	68.354433 N 19.046598 E	5	SAMPLE COLLECTION: Sample was placed naked (NA) on ice. NUCLEIC ACID EXTRACTION: DNeasy PowerSoil Kit (Qiagen cat# 12888-100) (PSP) - The manufacturer's protocol was followed for this extraction method.
Garnello.201607_AJE_1_10to14.NA_PSP_3	Garnello.201607_AJE_1_10to14.NA_PSP_3 (alternate names: MC E-10-14 NA-PSP-3, SB4413_J1359)	2016-07-20	0.10-0.14 meter	68.354433 N 19.046598 E	5	SAMPLE COLLECTION: Sample was placed naked (NA) on ice. NUCLEIC ACID EXTRACTION: DNeasy PowerSoil Kit (Qiagen cat# 12888-100) (PSP) - The manufacturer's protocol was followed for this extraction method.
Garnello.201607_AJE_1_30to34.NA_PSP_1	Garnello.201607_AJE_1_30to34.NA_PSP_1 (alternate names: MC E-30-34 NA-PSP-1, SB4414_J1359)	2016-07-20	0.30-0.34 meter	68.354433 N 19.046598 E	5.3	SAMPLE COLLECTION: Sample was placed naked (NA) on ice. NUCLEIC ACID EXTRACTION: DNeasy PowerSoil Kit (Qiagen cat# 12888-100) (PSP) - The manufacturer's protocol was followed for this extraction method.
Garnello.201607_AJE_1_30to34.NA_PSP_2	Garnello.201607_AJE_1_30to34.NA_PSP_2 (alternate names: MC E-30-34 NA-PSP-2, SB4415_J1359)	2016-07-20	0.30-0.34 meter	68.354433 N 19.046598 E	5.3	SAMPLE COLLECTION: Sample was placed naked (NA) on ice. NUCLEIC ACID EXTRACTION: DNeasy PowerSoil Kit (Qiagen cat# 12888-100) (PSP) - The manufacturer's protocol was followed for this extraction method.
Garnello.201607_AJE_1_30to34.NA_PSP_3	Garnello.201607_AJE_1_30to34.NA_PSP_3 (alternate names: MC E-30-34 NA-PSP-3, SB4416_J1359)	2016-07-20	0.30-0.34 meter	68.354433 N 19.046598 E	5.3	SAMPLE COLLECTION: Sample was placed naked (NA) on ice. NUCLEIC ACID EXTRACTION: DNeasy PowerSoil Kit (Qiagen cat# 12888-100) (PSP) - The manufacturer's protocol was followed for this extraction method.
Garnello.201607_AJS_1_10to14.LG_RC_1	Garnello.201607_AJS_1_10to14.LG_RC_1 (alternate names: MC S-10-14 LG-RC-1, SB4417_J1359)	2016-07-20	0.10-0.14 meter	68.354438 N 19.046693 E	5	SAMPLE COLLECTION: ~12 ml of LifeGuard buffer (Qiagen) (LG) was added to the tube, followed by vigorous hand shaking to achieve a thorough mixture of LG and peat. NUCLEIC ACID EXTRACTION: PowerSoil Total RNA Isolation kit and DNA Elution Accessory kit (RC) (Qiagen Cat# 12866-25 and 12867-25).
Garnello.201607_AJS_1_10to14.LG_RC_2	Garnello.201607_AJS_1_10to14.LG_RC_2 (alternate names: MC S-10-14 LG-RC-2, SB4418_J1359)	2016-07-20	0.10-0.14 meter	68.354438 N 19.046693 E	5	SAMPLE COLLECTION: ~12 ml of LifeGuard buffer (Qiagen) (LG) was added to the tube, followed by vigorous hand shaking to achieve a thorough mixture of LG and peat. NUCLEIC ACID EXTRACTION: PowerSoil Total RNA Isolation kit and DNA Elution Accessory kit (RC) (Qiagen Cat# 12866-25 and 12867-25).
Garnello.201607_AJS_1_10to14.LG_RC_3	Garnello.201607_AJS_1_10to14.LG_RC_3 (alternate names: MC S-10-14 LG-RC-3, SB4419_J1359)	2016-07-20	0.10-0.14 meter	68.354438 N 19.046693 E	5	SAMPLE COLLECTION: ~12 ml of LifeGuard buffer (Qiagen) (LG) was added to the tube, followed by vigorous hand shaking to achieve a thorough mixture of LG and peat. NUCLEIC ACID EXTRACTION: PowerSoil Total RNA Isolation kit and DNA Elution Accessory kit (RC) (Qiagen Cat# 12866-25 and 12867-25).
Garnello.201607_AJS_1_30to34.LG_RC_1	Garnello.201607_AJS_1_30to34.LG_RC_1 (alternate names: MC S-30-34 LG-RC-1, SB4420_J1359)	2016-07-20	0.30-0.34 meter	68.354438 N 19.046693 E	5.7	SAMPLE COLLECTION: ~12 ml of LifeGuard buffer (Qiagen) (LG) was added to the tube, followed by vigorous hand shaking to achieve a thorough mixture of LG and peat. NUCLEIC ACID EXTRACTION: PowerSoil Total RNA Isolation kit and DNA Elution Accessory kit (RC) (Qiagen Cat# 12866-25 and 12867-25).
Garnello.201607_AJS_1_30to34.LG_RC_2	Garnello.201607_AJS_1_30to34.LG_RC_2 (alternate names: MC S-30-34 LG-RC-2, SB4421_J1359)	2016-07-20	0.30-0.34 meter	68.354438 N 19.046693 E	5.7	SAMPLE COLLECTION: ~12 ml of LifeGuard buffer (Qiagen) (LG) was added to the tube, followed by vigorous hand shaking to achieve a thorough mixture of LG and peat. NUCLEIC ACID EXTRACTION: PowerSoil Total RNA Isolation kit and DNA Elution Accessory kit (RC) (Qiagen Cat# 12866-25 and 12867-25).
Garnello.201607_AJS_1_30to34.LG_RC_3	Garnello.201607_AJS_1_30to34.LG_RC_3 (alternate names: MC S-30-34 LG-RC-3, SB4422_J1359)	2016-07-20	0.30-0.34 meter	68.354438 N 19.046693 E	5.7	SAMPLE COLLECTION: ~12 ml of LifeGuard buffer (Qiagen) (LG) was added to the tube, followed by vigorous hand shaking to achieve a thorough mixture of LG and peat. NUCLEIC ACID EXTRACTION: PowerSoil Total RNA Isolation kit and DNA Elution Accessory kit (RC) (Qiagen Cat# 12866-25 and 12867-25).
Garnello.201607_AJP_1_10to14.LG_RC_1	Garnello.201607_AJP_1_10to14.LG_RC_1 (alternate names: MC P-10-14 LG-RC-1, SB4423_J1359)	2016-07-20	0.10-0.14 meter	68.354513 N 19.046747 E		SAMPLE COLLECTION: ~12 ml of LifeGuard buffer (Qiagen) (LG) was added to the tube, followed by vigorous hand shaking to achieve a thorough mixture of LG and peat. NUCLEIC ACID EXTRACTION: PowerSoil Total RNA Isolation kit and DNA Elution Accessory kit (RC) (Qiagen Cat# 12866-25 and 12867-25).
Garnello.201607_AJP_1_10to14.LG_RC_2	Garnello.201607_AJP_1_10to14.LG_RC_2 (alternate names: MC P-10-14 LG-RC-2, SB4424_J1359)	2016-07-20	0.10-0.14 meter	68.354513 N 19.046747 E		SAMPLE COLLECTION: ~12 ml of LifeGuard buffer (Qiagen) (LG) was added to the tube, followed by vigorous hand shaking to achieve a thorough mixture of LG and peat. NUCLEIC ACID EXTRACTION: PowerSoil Total RNA Isolation kit and DNA Elution Accessory kit (RC) (Qiagen Cat# 12866-25 and 12867-25).
Garnello.201607_AJP_1_10to14.LG_RC_3	Garnello.201607_AJP_1_10to14.LG_RC_3 (alternate names: MC P-10-14 LG-RC-3, SB4425_J1359)	2016-07-20	0.10-0.14 meter	68.354513 N 19.046747 E		SAMPLE COLLECTION: ~12 ml of LifeGuard buffer (Qiagen) (LG) was added to the tube, followed by vigorous hand shaking to achieve a thorough mixture of LG and peat. NUCLEIC ACID EXTRACTION: PowerSoil Total RNA Isolation kit and DNA Elution Accessory kit (RC) (Qiagen Cat# 12866-25 and 12867-25).
Garnello.201607_AJP_1_30to34.LG_RC_2	Garnello.201607_AJP_1_30to34.LG_RC_2 (alternate names: MC P-30-34 LG-RC-2, SB4427_J1359)	2016-07-20	0.30-0.34 meter	68.354513 N 19.046747 E		SAMPLE COLLECTION: ~12 ml of LifeGuard buffer (Qiagen) (LG) was added to the tube, followed by vigorous hand shaking to achieve a thorough mixture of LG and peat. NUCLEIC ACID EXTRACTION: PowerSoil Total RNA Isolation kit and DNA Elution Accessory kit (RC) (Qiagen Cat# 12866-25 and 12867-25).
Garnello.201607_AJP_1_30to34.LG_RC_3	Garnello.201607_AJP_1_30to34.LG_RC_3 (alternate names: MC P-30-34 LG-RC-3, SB4428_J1359)	2016-07-20	0.30-0.34 meter	68.354513 N 19.046747 E		SAMPLE COLLECTION: ~12 ml of LifeGuard buffer (Qiagen) (LG) was added to the tube, followed by vigorous hand shaking to achieve a thorough mixture of LG and peat. NUCLEIC ACID EXTRACTION: PowerSoil Total RNA Isolation kit and DNA Elution Accessory kit (RC) (Qiagen Cat# 12866-25 and 12867-25).
Garnello.201607_AJE_1_10to14.LG_RC_1	Garnello.201607_AJE_1_10to14.LG_RC_1 (alternate names: MC E-10-14 LG-RC-1, SB4429_J1359)	2016-07-20	0.10-0.14 meter	68.354433 N 19.046598 E	5	SAMPLE COLLECTION: ~12 ml of LifeGuard buffer (Qiagen) (LG) was added to the tube, followed by vigorous hand shaking to achieve a thorough mixture of LG and peat. NUCLEIC ACID EXTRACTION: PowerSoil Total RNA Isolation kit and DNA Elution Accessory kit (RC) (Qiagen Cat# 12866-25 and 12867-25).
Garnello.201607_AJE_1_10to14.LG_RC_2	Garnello.201607_AJE_1_10to14.LG_RC_2 (alternate names: MC E-10-14 LG-RC-2, SB4430_J1359)	2016-07-20	0.10-0.14 meter	68.354433 N 19.046598 E	5	SAMPLE COLLECTION: ~12 ml of LifeGuard buffer (Qiagen) (LG) was added to the tube, followed by vigorous hand shaking to achieve a thorough mixture of LG and peat. NUCLEIC ACID EXTRACTION: PowerSoil Total RNA Isolation kit and DNA Elution Accessory kit (RC) (Qiagen Cat# 12866-25 and 12867-25).
Garnello.201607_AJE_1_10to14.LG_RC_3	Garnello.201607_AJE_1_10to14.LG_RC_3 (alternate names: MC E-10-14 LG-RC-3, SB4431_J1359)	2016-07-20	0.10-0.14 meter	68.354433 N 19.046598 E	5	SAMPLE COLLECTION: ~12 ml of LifeGuard buffer (Qiagen) (LG) was added to the tube, followed by vigorous hand shaking to achieve a thorough mixture of LG and peat. NUCLEIC ACID EXTRACTION: PowerSoil Total RNA Isolation kit and DNA Elution Accessory kit (RC) (Qiagen Cat# 12866-25 and 12867-25).
Garnello.201607_AJE_1_30to34.LG_RC_1	Garnello.201607_AJE_1_30to34.LG_RC_1 (alternate names: MC E-30-34 LG-RC-1, SB4432_J1359)	2016-07-20	0.30-0.34 meter	68.354433 N 19.046598 E	5.3	SAMPLE COLLECTION: ~12 ml of LifeGuard buffer (Qiagen) (LG) was added to the tube, followed by vigorous hand shaking to achieve a thorough mixture of LG and peat. NUCLEIC ACID EXTRACTION: PowerSoil Total RNA Isolation kit and DNA Elution Accessory kit (RC) (Qiagen Cat# 12866-25 and 12867-25).
Garnello.201607_AJE_1_30to34.LG_RC_2	Garnello.201607_AJE_1_30to34.LG_RC_2 (alternate names: MC E-30-34 LG-RC-2, SB4433_J1359)	2016-07-20	0.30-0.34 meter	68.354433 N 19.046598 E	5.3	SAMPLE COLLECTION: ~12 ml of LifeGuard buffer (Qiagen) (LG) was added to the tube, followed by vigorous hand shaking to achieve a thorough mixture of LG and peat. NUCLEIC ACID EXTRACTION: PowerSoil Total RNA Isolation kit and DNA Elution Accessory kit (RC) (Qiagen Cat# 12866-25 and 12867-25).
Garnello.201607_AJE_1_30to34.LG_RC_3	Garnello.201607_AJE_1_30to34.LG_RC_3 (alternate names: MC E-30-34 LG-RC-3, SB4434_J1359)	2016-07-20	0.30-0.34 meter	68.354433 N 19.046598 E	5.3	SAMPLE COLLECTION: ~12 ml of LifeGuard buffer (Qiagen) (LG) was added to the tube, followed by vigorous hand shaking to achieve a thorough mixture of LG and peat. NUCLEIC ACID EXTRACTION: PowerSoil Total RNA Isolation kit and DNA Elution Accessory kit (RC) (Qiagen Cat# 12866-25 and 12867-25).
Garnello.201607_AJP_1_10to14.LG_SR_1	Garnello.201607_AJP_1_10to14.LG_SR_1 (alternate names: MC P-10-14 LG-SR-1, SB6347_J1514)	2016-07-20	0.10-0.14 meter	68.354513 N 19.046747 E		SAMPLE COLLECTION: ~12 ml of LifeGuard buffer (Qiagen) (LG) was added to the tube, followed by vigorous hand shaking to achieve a thorough mixture of LG and peat. NUCLEIC ACID EXTRACTION: Standard with alternative reagents (SR) - Identical to the 'S' method, except that the reagents used in the original kit were replaced with identical alternative reagents provided by Mobio/Qiagen. Specifically, …
Garnello.201607_AJP_1_10to14.LG_SR_2	Garnello.201607_AJP_1_10to14.LG_SR_2 (alternate names: MC P-10-14 LG-SR-2, SB6348_J1514)	2016-07-20	0.10-0.14 meter	68.354513 N 19.046747 E		SAMPLE COLLECTION: ~12 ml of LifeGuard buffer (Qiagen) (LG) was added to the tube, followed by vigorous hand shaking to achieve a thorough mixture of LG and peat. NUCLEIC ACID EXTRACTION: Standard with alternative reagents (SR) - Identical to the 'S' method, except that the reagents used in the original kit were replaced with identical alternative reagents provided by Mobio/Qiagen. Specifically, …
Garnello.201607_AJP_1_10to14.LG_SR_3	Garnello.201607_AJP_1_10to14.LG_SR_3 (alternate names: MC P-10-14 LG-SR-3, SB6349_J1514)	2016-07-20	0.10-0.14 meter	68.354513 N 19.046747 E		SAMPLE COLLECTION: ~12 ml of LifeGuard buffer (Qiagen) (LG) was added to the tube, followed by vigorous hand shaking to achieve a thorough mixture of LG and peat. NUCLEIC ACID EXTRACTION: Standard with alternative reagents (SR) - Identical to the 'S' method, except that the reagents used in the original kit were replaced with identical alternative reagents provided by Mobio/Qiagen. Specifically, …
Garnello.201607_AJP_1_30to34.LG_SR_1	Garnello.201607_AJP_1_30to34.LG_SR_1 (alternate names: MC P-30-34 LG-SR-1, SB6350_J1514)	2016-07-20	0.30-0.34 meter	68.354513 N 19.046747 E		SAMPLE COLLECTION: ~12 ml of LifeGuard buffer (Qiagen) (LG) was added to the tube, followed by vigorous hand shaking to achieve a thorough mixture of LG and peat. NUCLEIC ACID EXTRACTION: Standard with alternative reagents (SR) - Identical to the 'S' method, except that the reagents used in the original kit were replaced with identical alternative reagents provided by Mobio/Qiagen. Specifically, …
Garnello.201607_AJP_1_30to34.LG_SR_2	Garnello.201607_AJP_1_30to34.LG_SR_2 (alternate names: MC P-30-34 LG-SR-2, SB6351_J1514)	2016-07-20	0.30-0.34 meter	68.354513 N 19.046747 E		SAMPLE COLLECTION: ~12 ml of LifeGuard buffer (Qiagen) (LG) was added to the tube, followed by vigorous hand shaking to achieve a thorough mixture of LG and peat. NUCLEIC ACID EXTRACTION: Standard with alternative reagents (SR) - Identical to the 'S' method, except that the reagents used in the original kit were replaced with identical alternative reagents provided by Mobio/Qiagen. Specifically, …
Garnello.201607_AJP_1_30to34.LG_SR_3	Garnello.201607_AJP_1_30to34.LG_SR_3 (alternate names: MC P-30-34 LG-SR-3, SB6352_J1514)	2016-07-20	0.30-0.34 meter	68.354513 N 19.046747 E		SAMPLE COLLECTION: ~12 ml of LifeGuard buffer (Qiagen) (LG) was added to the tube, followed by vigorous hand shaking to achieve a thorough mixture of LG and peat. NUCLEIC ACID EXTRACTION: Standard with alternative reagents (SR) - Identical to the 'S' method, except that the reagents used in the original kit were replaced with identical alternative reagents provided by Mobio/Qiagen. Specifically, …
Garnello.201607_AJS_1_10to14.LG_SR_1	Garnello.201607_AJS_1_10to14.LG_SR_1 (alternate names: MC S-10-14 LG-SR-1, SB6353_J1514)	2016-07-20	0.10-0.14 meter	68.354438 N 19.046693 E	5	SAMPLE COLLECTION: ~12 ml of LifeGuard buffer (Qiagen) (LG) was added to the tube, followed by vigorous hand shaking to achieve a thorough mixture of LG and peat. NUCLEIC ACID EXTRACTION: Standard with alternative reagents (SR) - Identical to the 'S' method, except that the reagents used in the original kit were replaced with identical alternative reagents provided by Mobio/Qiagen. Specifically, …
Garnello.201607_AJS_1_10to14.LG_SR_2	Garnello.201607_AJS_1_10to14.LG_SR_2 (alternate names: MC S-10-14 LG-SR-2, SB6354_J1514)	2016-07-20	0.10-0.14 meter	68.354438 N 19.046693 E	5	SAMPLE COLLECTION: ~12 ml of LifeGuard buffer (Qiagen) (LG) was added to the tube, followed by vigorous hand shaking to achieve a thorough mixture of LG and peat. NUCLEIC ACID EXTRACTION: Standard with alternative reagents (SR) - Identical to the 'S' method, except that the reagents used in the original kit were replaced with identical alternative reagents provided by Mobio/Qiagen. Specifically, …
Garnello.201607_AJS_1_10to14.LG_SR_3	Garnello.201607_AJS_1_10to14.LG_SR_3 (alternate names: MC S-10-14 LG-SR-3, SB6355_J1514)	2016-07-20	0.10-0.14 meter	68.354438 N 19.046693 E	5	SAMPLE COLLECTION: ~12 ml of LifeGuard buffer (Qiagen) (LG) was added to the tube, followed by vigorous hand shaking to achieve a thorough mixture of LG and peat. NUCLEIC ACID EXTRACTION: Standard with alternative reagents (SR) - Identical to the 'S' method, except that the reagents used in the original kit were replaced with identical alternative reagents provided by Mobio/Qiagen. Specifically, …
Garnello.201607_AJS_1_30to34.LG_SR_1	Garnello.201607_AJS_1_30to34.LG_SR_1 (alternate names: MC S-30-34 LG-SR-1, SB6356_J1514)	2016-07-20	0.30-0.34 meter	68.354438 N 19.046693 E	5.7	SAMPLE COLLECTION: ~12 ml of LifeGuard buffer (Qiagen) (LG) was added to the tube, followed by vigorous hand shaking to achieve a thorough mixture of LG and peat. NUCLEIC ACID EXTRACTION: Standard with alternative reagents (SR) - Identical to the 'S' method, except that the reagents used in the original kit were replaced with identical alternative reagents provided by Mobio/Qiagen. Specifically, …
Garnello.201607_AJS_1_30to34.LG_SR_2	Garnello.201607_AJS_1_30to34.LG_SR_2 (alternate names: MC S-30-34 LG-SR-2, SB6357_J1558)	2016-07-20	0.30-0.34 meter	68.354438 N 19.046693 E	5.7	SAMPLE COLLECTION: ~12 ml of LifeGuard buffer (Qiagen) (LG) was added to the tube, followed by vigorous hand shaking to achieve a thorough mixture of LG and peat. NUCLEIC ACID EXTRACTION: Standard with alternative reagents (SR) - Identical to the 'S' method, except that the reagents used in the original kit were replaced with identical alternative reagents provided by Mobio/Qiagen. Specifically, …
Garnello.201607_AJS_1_30to34.LG_SR_3	Garnello.201607_AJS_1_30to34.LG_SR_3 (alternate names: MC S-30-34 LG-SR-3, SB6358_J1514)	2016-07-20	0.30-0.34 meter	68.354438 N 19.046693 E	5.7	SAMPLE COLLECTION: ~12 ml of LifeGuard buffer (Qiagen) (LG) was added to the tube, followed by vigorous hand shaking to achieve a thorough mixture of LG and peat. NUCLEIC ACID EXTRACTION: Standard with alternative reagents (SR) - Identical to the 'S' method, except that the reagents used in the original kit were replaced with identical alternative reagents provided by Mobio/Qiagen. Specifically, …
Garnello.201607_AJE_1_10to14.LG_SR_1	Garnello.201607_AJE_1_10to14.LG_SR_1 (alternate names: MC E-10-14 LG-SR-1, SB6359_J1514)	2016-07-20	0.10-0.14 meter	68.354433 N 19.046598 E	5	SAMPLE COLLECTION: ~12 ml of LifeGuard buffer (Qiagen) (LG) was added to the tube, followed by vigorous hand shaking to achieve a thorough mixture of LG and peat. NUCLEIC ACID EXTRACTION: Standard with alternative reagents (SR) - Identical to the 'S' method, except that the reagents used in the original kit were replaced with identical alternative reagents provided by Mobio/Qiagen. Specifically, …
Garnello.201607_AJE_1_10to14.LG_SR_2	Garnello.201607_AJE_1_10to14.LG_SR_2 (alternate names: MC E-10-14 LG-SR-2, SB6360_J1514)	2016-07-20	0.10-0.14 meter	68.354433 N 19.046598 E	5	SAMPLE COLLECTION: ~12 ml of LifeGuard buffer (Qiagen) (LG) was added to the tube, followed by vigorous hand shaking to achieve a thorough mixture of LG and peat. NUCLEIC ACID EXTRACTION: Standard with alternative reagents (SR) - Identical to the 'S' method, except that the reagents used in the original kit were replaced with identical alternative reagents provided by Mobio/Qiagen. Specifically, …
Garnello.201607_AJE_1_10to14.LG_SR_3	Garnello.201607_AJE_1_10to14.LG_SR_3 (alternate names: MC E-10-14 LG-SR-3, SB6361_J1514)	2016-07-20	0.10-0.14 meter	68.354433 N 19.046598 E	5	SAMPLE COLLECTION: ~12 ml of LifeGuard buffer (Qiagen) (LG) was added to the tube, followed by vigorous hand shaking to achieve a thorough mixture of LG and peat. NUCLEIC ACID EXTRACTION: Standard with alternative reagents (SR) - Identical to the 'S' method, except that the reagents used in the original kit were replaced with identical alternative reagents provided by Mobio/Qiagen. Specifically, …
Garnello.201607_AJE_1_30to34.LG_SR_1	Garnello.201607_AJE_1_30to34.LG_SR_1 (alternate names: MC E-30-34 LG-SR-1, SB6362_J1514)	2016-07-20	0.30-0.34 meter	68.354433 N 19.046598 E	5.3	SAMPLE COLLECTION: ~12 ml of LifeGuard buffer (Qiagen) (LG) was added to the tube, followed by vigorous hand shaking to achieve a thorough mixture of LG and peat. NUCLEIC ACID EXTRACTION: Standard with alternative reagents (SR) - Identical to the 'S' method, except that the reagents used in the original kit were replaced with identical alternative reagents provided by Mobio/Qiagen. Specifically, …
Garnello.201607_AJE_1_30to34.LG_SR_2	Garnello.201607_AJE_1_30to34.LG_SR_2 (alternate names: MC E-30-34 LG-SR-2, SB6363_J1514)	2016-07-20	0.30-0.34 meter	68.354433 N 19.046598 E	5.3	SAMPLE COLLECTION: ~12 ml of LifeGuard buffer (Qiagen) (LG) was added to the tube, followed by vigorous hand shaking to achieve a thorough mixture of LG and peat. NUCLEIC ACID EXTRACTION: Standard with alternative reagents (SR) - Identical to the 'S' method, except that the reagents used in the original kit were replaced with identical alternative reagents provided by Mobio/Qiagen. Specifically, …
Garnello.201607_AJE_1_30to34.LG_SR_3	Garnello.201607_AJE_1_30to34.LG_SR_3 (alternate names: MC E-30-34 LG-SR-3, SB6364_J1514)	2016-07-20	0.30-0.34 meter	68.354433 N 19.046598 E	5.3	SAMPLE COLLECTION: ~12 ml of LifeGuard buffer (Qiagen) (LG) was added to the tube, followed by vigorous hand shaking to achieve a thorough mixture of LG and peat. NUCLEIC ACID EXTRACTION: Standard with alternative reagents (SR) - Identical to the 'S' method, except that the reagents used in the original kit were replaced with identical alternative reagents provided by Mobio/Qiagen. Specifically, …
Garnello.201607_AJP_1_10to14.NA_S_1	Garnello.201607_AJP_1_10to14.NA_S_1 (alternate names: MC P-10-14 NA-S-1, SB6365_J1514)	2016-07-20	0.10-0.14 meter	68.354513 N 19.046747 E		SAMPLE COLLECTION: Sample was placed naked (NA) on ice. NUCLEIC ACID EXTRACTION: Standard (S) - a modified Mobio PowerMax Soil DNA/RNA isolation kit (Qiagen Cat# 12966-10). This protocol has been used from 2010-present for multi-omics studies by several sequential US-based projects (IsoGenie: DOE grant #s DE-SC0004632, DE-SC0010580, & DE-SC0016440; and EMERGE: NSF grant # 2022070).
Garnello.201607_AJP_1_10to14.NA_S_2	Garnello.201607_AJP_1_10to14.NA_S_2 (alternate names: MC P-10-14 NA-S-2, SB6366_J1514)	2016-07-20	0.10-0.14 meter	68.354513 N 19.046747 E		SAMPLE COLLECTION: Sample was placed naked (NA) on ice. NUCLEIC ACID EXTRACTION: Standard (S) - a modified Mobio PowerMax Soil DNA/RNA isolation kit (Qiagen Cat# 12966-10). This protocol has been used from 2010-present for multi-omics studies by several sequential US-based projects (IsoGenie: DOE grant #s DE-SC0004632, DE-SC0010580, & DE-SC0016440; and EMERGE: NSF grant # 2022070).
Garnello.201607_AJP_1_10to14.NA_S_3	Garnello.201607_AJP_1_10to14.NA_S_3 (alternate names: MC P-10-14 NA-S-3, SB6367_J1514)	2016-07-20	0.10-0.14 meter	68.354513 N 19.046747 E		SAMPLE COLLECTION: Sample was placed naked (NA) on ice. NUCLEIC ACID EXTRACTION: Standard (S) - a modified Mobio PowerMax Soil DNA/RNA isolation kit (Qiagen Cat# 12966-10). This protocol has been used from 2010-present for multi-omics studies by several sequential US-based projects (IsoGenie: DOE grant #s DE-SC0004632, DE-SC0010580, & DE-SC0016440; and EMERGE: NSF grant # 2022070).
Garnello.201607_AJP_1_30to34.NA_S_1	Garnello.201607_AJP_1_30to34.NA_S_1 (alternate names: MC P-30-34 NA-S-1, SB6368_J1514)	2016-07-20	0.30-0.34 meter	68.354513 N 19.046747 E		SAMPLE COLLECTION: Sample was placed naked (NA) on ice. NUCLEIC ACID EXTRACTION: Standard (S) - a modified Mobio PowerMax Soil DNA/RNA isolation kit (Qiagen Cat# 12966-10). This protocol has been used from 2010-present for multi-omics studies by several sequential US-based projects (IsoGenie: DOE grant #s DE-SC0004632, DE-SC0010580, & DE-SC0016440; and EMERGE: NSF grant # 2022070).
Garnello.201607_AJP_1_30to34.NA_S_2	Garnello.201607_AJP_1_30to34.NA_S_2 (alternate names: MC P-30-34 NA-S-2, SB6369_J1514)	2016-07-20	0.30-0.34 meter	68.354513 N 19.046747 E		SAMPLE COLLECTION: Sample was placed naked (NA) on ice. NUCLEIC ACID EXTRACTION: Standard (S) - a modified Mobio PowerMax Soil DNA/RNA isolation kit (Qiagen Cat# 12966-10). This protocol has been used from 2010-present for multi-omics studies by several sequential US-based projects (IsoGenie: DOE grant #s DE-SC0004632, DE-SC0010580, & DE-SC0016440; and EMERGE: NSF grant # 2022070).
Garnello.201607_AJP_1_30to34.NA_S_3	Garnello.201607_AJP_1_30to34.NA_S_3 (alternate names: MC P-30-34 NA-S-3, SB6370_J1514)	2016-07-20	0.30-0.34 meter	68.354513 N 19.046747 E		SAMPLE COLLECTION: Sample was placed naked (NA) on ice. NUCLEIC ACID EXTRACTION: Standard (S) - a modified Mobio PowerMax Soil DNA/RNA isolation kit (Qiagen Cat# 12966-10). This protocol has been used from 2010-present for multi-omics studies by several sequential US-based projects (IsoGenie: DOE grant #s DE-SC0004632, DE-SC0010580, & DE-SC0016440; and EMERGE: NSF grant # 2022070).
Garnello.201607_AJS_1_10to14.NA_S_1	Garnello.201607_AJS_1_10to14.NA_S_1 (alternate names: MC S-10-14 NA-S-1, SB6371_J1514)	2016-07-20	0.10-0.14 meter	68.354438 N 19.046693 E	5	SAMPLE COLLECTION: Sample was placed naked (NA) on ice. NUCLEIC ACID EXTRACTION: Standard (S) - a modified Mobio PowerMax Soil DNA/RNA isolation kit (Qiagen Cat# 12966-10). This protocol has been used from 2010-present for multi-omics studies by several sequential US-based projects (IsoGenie: DOE grant #s DE-SC0004632, DE-SC0010580, & DE-SC0016440; and EMERGE: NSF grant # 2022070).
Garnello.201607_AJS_1_10to14.NA_S_2	Garnello.201607_AJS_1_10to14.NA_S_2 (alternate names: MC S-10-14 NA-S-2, SB6372_J1514)	2016-07-20	0.10-0.14 meter	68.354438 N 19.046693 E	5	SAMPLE COLLECTION: Sample was placed naked (NA) on ice. NUCLEIC ACID EXTRACTION: Standard (S) - a modified Mobio PowerMax Soil DNA/RNA isolation kit (Qiagen Cat# 12966-10). This protocol has been used from 2010-present for multi-omics studies by several sequential US-based projects (IsoGenie: DOE grant #s DE-SC0004632, DE-SC0010580, & DE-SC0016440; and EMERGE: NSF grant # 2022070).
Garnello.201607_AJS_1_10to14.NA_S_3	Garnello.201607_AJS_1_10to14.NA_S_3 (alternate names: MC S-10-14 NA-S-3, SB6373_J1514)	2016-07-20	0.10-0.14 meter	68.354438 N 19.046693 E	5	SAMPLE COLLECTION: Sample was placed naked (NA) on ice. NUCLEIC ACID EXTRACTION: Standard (S) - a modified Mobio PowerMax Soil DNA/RNA isolation kit (Qiagen Cat# 12966-10). This protocol has been used from 2010-present for multi-omics studies by several sequential US-based projects (IsoGenie: DOE grant #s DE-SC0004632, DE-SC0010580, & DE-SC0016440; and EMERGE: NSF grant # 2022070).
Garnello.201607_AJS_1_30to34.NA_S_1	Garnello.201607_AJS_1_30to34.NA_S_1 (alternate names: MC S-30-34 NA-S-1, SB6374_J1514)	2016-07-20	0.30-0.34 meter	68.354438 N 19.046693 E	5.7	SAMPLE COLLECTION: Sample was placed naked (NA) on ice. NUCLEIC ACID EXTRACTION: Standard (S) - a modified Mobio PowerMax Soil DNA/RNA isolation kit (Qiagen Cat# 12966-10). This protocol has been used from 2010-present for multi-omics studies by several sequential US-based projects (IsoGenie: DOE grant #s DE-SC0004632, DE-SC0010580, & DE-SC0016440; and EMERGE: NSF grant # 2022070).
Garnello.201607_AJS_1_30to34.NA_S_2	Garnello.201607_AJS_1_30to34.NA_S_2 (alternate names: MC S-30-34 NA-S-2, SB6375_J1514)	2016-07-20	0.30-0.34 meter	68.354438 N 19.046693 E	5.7	SAMPLE COLLECTION: Sample was placed naked (NA) on ice. NUCLEIC ACID EXTRACTION: Standard (S) - a modified Mobio PowerMax Soil DNA/RNA isolation kit (Qiagen Cat# 12966-10). This protocol has been used from 2010-present for multi-omics studies by several sequential US-based projects (IsoGenie: DOE grant #s DE-SC0004632, DE-SC0010580, & DE-SC0016440; and EMERGE: NSF grant # 2022070).
Garnello.201607_AJS_1_30to34.NA_S_3	Garnello.201607_AJS_1_30to34.NA_S_3 (alternate names: MC S-30-34 NA-S-3, SB6376_J1514)	2016-07-20	0.30-0.34 meter	68.354438 N 19.046693 E	5.7	SAMPLE COLLECTION: Sample was placed naked (NA) on ice. NUCLEIC ACID EXTRACTION: Standard (S) - a modified Mobio PowerMax Soil DNA/RNA isolation kit (Qiagen Cat# 12966-10). This protocol has been used from 2010-present for multi-omics studies by several sequential US-based projects (IsoGenie: DOE grant #s DE-SC0004632, DE-SC0010580, & DE-SC0016440; and EMERGE: NSF grant # 2022070).
Garnello.201607_AJE_1_10to14.NA_S_1	Garnello.201607_AJE_1_10to14.NA_S_1 (alternate names: MC E-10-14 NA-S-1, SB6377_J1514)	2016-07-20	0.10-0.14 meter	68.354433 N 19.046598 E	5	SAMPLE COLLECTION: Sample was placed naked (NA) on ice. NUCLEIC ACID EXTRACTION: Standard (S) - a modified Mobio PowerMax Soil DNA/RNA isolation kit (Qiagen Cat# 12966-10). This protocol has been used from 2010-present for multi-omics studies by several sequential US-based projects (IsoGenie: DOE grant #s DE-SC0004632, DE-SC0010580, & DE-SC0016440; and EMERGE: NSF grant # 2022070).
Garnello.201607_AJE_1_10to14.NA_S_2	Garnello.201607_AJE_1_10to14.NA_S_2 (alternate names: MC E-10-14 NA-S-2, SB6378_J1514)	2016-07-20	0.10-0.14 meter	68.354433 N 19.046598 E	5	SAMPLE COLLECTION: Sample was placed naked (NA) on ice. NUCLEIC ACID EXTRACTION: Standard (S) - a modified Mobio PowerMax Soil DNA/RNA isolation kit (Qiagen Cat# 12966-10). This protocol has been used from 2010-present for multi-omics studies by several sequential US-based projects (IsoGenie: DOE grant #s DE-SC0004632, DE-SC0010580, & DE-SC0016440; and EMERGE: NSF grant # 2022070).
Garnello.201607_AJE_1_10to14.NA_S_3	Garnello.201607_AJE_1_10to14.NA_S_3 (alternate names: MC E-10-14 NA-S-3, SB6379_J1514)	2016-07-20	0.10-0.14 meter	68.354433 N 19.046598 E	5	SAMPLE COLLECTION: Sample was placed naked (NA) on ice. NUCLEIC ACID EXTRACTION: Standard (S) - a modified Mobio PowerMax Soil DNA/RNA isolation kit (Qiagen Cat# 12966-10). This protocol has been used from 2010-present for multi-omics studies by several sequential US-based projects (IsoGenie: DOE grant #s DE-SC0004632, DE-SC0010580, & DE-SC0016440; and EMERGE: NSF grant # 2022070).
Garnello.201607_AJE_1_30to34.NA_S_1	Garnello.201607_AJE_1_30to34.NA_S_1 (alternate names: MC E-30-34 NA-S-1, SB6380_J1514)	2016-07-20	0.30-0.34 meter	68.354433 N 19.046598 E	5.3	SAMPLE COLLECTION: Sample was placed naked (NA) on ice. NUCLEIC ACID EXTRACTION: Standard (S) - a modified Mobio PowerMax Soil DNA/RNA isolation kit (Qiagen Cat# 12966-10). This protocol has been used from 2010-present for multi-omics studies by several sequential US-based projects (IsoGenie: DOE grant #s DE-SC0004632, DE-SC0010580, & DE-SC0016440; and EMERGE: NSF grant # 2022070).
Garnello.201607_AJE_1_30to34.NA_S_2	Garnello.201607_AJE_1_30to34.NA_S_2 (alternate names: MC E-30-34 NA-S-2, SB6381_J1514)	2016-07-20	0.30-0.34 meter	68.354433 N 19.046598 E	5.3	SAMPLE COLLECTION: Sample was placed naked (NA) on ice. NUCLEIC ACID EXTRACTION: Standard (S) - a modified Mobio PowerMax Soil DNA/RNA isolation kit (Qiagen Cat# 12966-10). This protocol has been used from 2010-present for multi-omics studies by several sequential US-based projects (IsoGenie: DOE grant #s DE-SC0004632, DE-SC0010580, & DE-SC0016440; and EMERGE: NSF grant # 2022070).
Garnello.201607_AJE_1_30to34.NA_S_3	Garnello.201607_AJE_1_30to34.NA_S_3 (alternate names: MC E-30-34 NA-S-3, SB6382_J1514)	2016-07-20	0.30-0.34 meter	68.354433 N 19.046598 E	5.3	SAMPLE COLLECTION: Sample was placed naked (NA) on ice. NUCLEIC ACID EXTRACTION: Standard (S) - a modified Mobio PowerMax Soil DNA/RNA isolation kit (Qiagen Cat# 12966-10). This protocol has been used from 2010-present for multi-omics studies by several sequential US-based projects (IsoGenie: DOE grant #s DE-SC0004632, DE-SC0010580, & DE-SC0016440; and EMERGE: NSF grant # 2022070).
Garnello.201607_AJP_1_10to14.LN_S_1	Garnello.201607_AJP_1_10to14.LN_S_1 (alternate names: MC P-10-14 LN-S-1, SB6383_J1514)	2016-07-20	0.10-0.14 meter	68.354513 N 19.046747 E		SAMPLE COLLECTION: Sample was immediately flash-frozen in liquid nitrogen (LN). NUCLEIC ACID EXTRACTION: Standard (S) - a modified Mobio PowerMax Soil DNA/RNA isolation kit (Qiagen Cat# 12966-10). This protocol has been used from 2010-present for multi-omics studies by several sequential US-based projects (IsoGenie: DOE grant #s DE-SC0004632, DE-SC0010580, & DE-SC0016440; and EMERGE: NSF grant # …
Garnello.201607_AJP_1_10to14.LN_S_2	Garnello.201607_AJP_1_10to14.LN_S_2 (alternate names: MC P-10-14 LN-S-2, SB6384_J1514)	2016-07-20	0.10-0.14 meter	68.354513 N 19.046747 E		SAMPLE COLLECTION: Sample was immediately flash-frozen in liquid nitrogen (LN). NUCLEIC ACID EXTRACTION: Standard (S) - a modified Mobio PowerMax Soil DNA/RNA isolation kit (Qiagen Cat# 12966-10). This protocol has been used from 2010-present for multi-omics studies by several sequential US-based projects (IsoGenie: DOE grant #s DE-SC0004632, DE-SC0010580, & DE-SC0016440; and EMERGE: NSF grant # …
Garnello.201607_AJP_1_10to14.LN_S_3	Garnello.201607_AJP_1_10to14.LN_S_3 (alternate names: MC P-10-14 LN-S-3, SB6385_J1514)	2016-07-20	0.10-0.14 meter	68.354513 N 19.046747 E		SAMPLE COLLECTION: Sample was immediately flash-frozen in liquid nitrogen (LN). NUCLEIC ACID EXTRACTION: Standard (S) - a modified Mobio PowerMax Soil DNA/RNA isolation kit (Qiagen Cat# 12966-10). This protocol has been used from 2010-present for multi-omics studies by several sequential US-based projects (IsoGenie: DOE grant #s DE-SC0004632, DE-SC0010580, & DE-SC0016440; and EMERGE: NSF grant # …
Garnello.201607_AJP_1_30to34.LN_S_1	Garnello.201607_AJP_1_30to34.LN_S_1 (alternate names: MC P-30-34 LN-S-1, SB6386_J1514)	2016-07-20	0.30-0.34 meter	68.354513 N 19.046747 E		SAMPLE COLLECTION: Sample was immediately flash-frozen in liquid nitrogen (LN). NUCLEIC ACID EXTRACTION: Standard (S) - a modified Mobio PowerMax Soil DNA/RNA isolation kit (Qiagen Cat# 12966-10). This protocol has been used from 2010-present for multi-omics studies by several sequential US-based projects (IsoGenie: DOE grant #s DE-SC0004632, DE-SC0010580, & DE-SC0016440; and EMERGE: NSF grant # …
Garnello.201607_AJP_1_30to34.LN_S_2	Garnello.201607_AJP_1_30to34.LN_S_2 (alternate names: MC P-30-34 LN-S-2, SB6387_J1514)	2016-07-20	0.30-0.34 meter	68.354513 N 19.046747 E		SAMPLE COLLECTION: Sample was immediately flash-frozen in liquid nitrogen (LN). NUCLEIC ACID EXTRACTION: Standard (S) - a modified Mobio PowerMax Soil DNA/RNA isolation kit (Qiagen Cat# 12966-10). This protocol has been used from 2010-present for multi-omics studies by several sequential US-based projects (IsoGenie: DOE grant #s DE-SC0004632, DE-SC0010580, & DE-SC0016440; and EMERGE: NSF grant # …
Garnello.201607_AJP_1_30to34.LN_S_3	Garnello.201607_AJP_1_30to34.LN_S_3 (alternate names: MC P-30-34 LN-S-3, SB6388_J1514)	2016-07-20	0.30-0.34 meter	68.354513 N 19.046747 E		SAMPLE COLLECTION: Sample was immediately flash-frozen in liquid nitrogen (LN). NUCLEIC ACID EXTRACTION: Standard (S) - a modified Mobio PowerMax Soil DNA/RNA isolation kit (Qiagen Cat# 12966-10). This protocol has been used from 2010-present for multi-omics studies by several sequential US-based projects (IsoGenie: DOE grant #s DE-SC0004632, DE-SC0010580, & DE-SC0016440; and EMERGE: NSF grant # …
Garnello.201607_AJS_1_10to14.LN_S_1	Garnello.201607_AJS_1_10to14.LN_S_1 (alternate names: MC S-10-14 LN-S-1, SB6389_J1597)	2016-07-20	0.10-0.14 meter	68.354438 N 19.046693 E	5	SAMPLE COLLECTION: Sample was immediately flash-frozen in liquid nitrogen (LN). NUCLEIC ACID EXTRACTION: Standard (S) - a modified Mobio PowerMax Soil DNA/RNA isolation kit (Qiagen Cat# 12966-10). This protocol has been used from 2010-present for multi-omics studies by several sequential US-based projects (IsoGenie: DOE grant #s DE-SC0004632, DE-SC0010580, & DE-SC0016440; and EMERGE: NSF grant # …
Garnello.201607_AJS_1_10to14.LN_S_2	Garnello.201607_AJS_1_10to14.LN_S_2 (alternate names: MC S-10-14 LN-S-2, SB6390_J1514)	2016-07-20	0.10-0.14 meter	68.354438 N 19.046693 E	5	SAMPLE COLLECTION: Sample was immediately flash-frozen in liquid nitrogen (LN). NUCLEIC ACID EXTRACTION: Standard (S) - a modified Mobio PowerMax Soil DNA/RNA isolation kit (Qiagen Cat# 12966-10). This protocol has been used from 2010-present for multi-omics studies by several sequential US-based projects (IsoGenie: DOE grant #s DE-SC0004632, DE-SC0010580, & DE-SC0016440; and EMERGE: NSF grant # …
Garnello.201607_AJS_1_10to14.LN_S_3	Garnello.201607_AJS_1_10to14.LN_S_3 (alternate names: MC S-10-14 LN-S-3, SB6391_J1514)	2016-07-20	0.10-0.14 meter	68.354438 N 19.046693 E	5	SAMPLE COLLECTION: Sample was immediately flash-frozen in liquid nitrogen (LN). NUCLEIC ACID EXTRACTION: Standard (S) - a modified Mobio PowerMax Soil DNA/RNA isolation kit (Qiagen Cat# 12966-10). This protocol has been used from 2010-present for multi-omics studies by several sequential US-based projects (IsoGenie: DOE grant #s DE-SC0004632, DE-SC0010580, & DE-SC0016440; and EMERGE: NSF grant # …
Garnello.201607_AJS_1_30to34.LN_S_1	Garnello.201607_AJS_1_30to34.LN_S_1 (alternate names: MC S-30-34 LN-S-1, SB6392_J1597)	2016-07-20	0.30-0.34 meter	68.354438 N 19.046693 E	5.7	SAMPLE COLLECTION: Sample was immediately flash-frozen in liquid nitrogen (LN). NUCLEIC ACID EXTRACTION: Standard (S) - a modified Mobio PowerMax Soil DNA/RNA isolation kit (Qiagen Cat# 12966-10). This protocol has been used from 2010-present for multi-omics studies by several sequential US-based projects (IsoGenie: DOE grant #s DE-SC0004632, DE-SC0010580, & DE-SC0016440; and EMERGE: NSF grant # …
Garnello.201607_AJS_1_30to34.LN_S_2	Garnello.201607_AJS_1_30to34.LN_S_2 (alternate names: MC S-30-34 LN-S-2, SB6393_J1558)	2016-07-20	0.30-0.34 meter	68.354438 N 19.046693 E	5.7	SAMPLE COLLECTION: Sample was immediately flash-frozen in liquid nitrogen (LN). NUCLEIC ACID EXTRACTION: Standard (S) - a modified Mobio PowerMax Soil DNA/RNA isolation kit (Qiagen Cat# 12966-10). This protocol has been used from 2010-present for multi-omics studies by several sequential US-based projects (IsoGenie: DOE grant #s DE-SC0004632, DE-SC0010580, & DE-SC0016440; and EMERGE: NSF grant # …
Garnello.201607_AJS_1_30to34.LN_S_3	Garnello.201607_AJS_1_30to34.LN_S_3 (alternate names: MC S-30-34 LN-S-3, SB6394_J1514)	2016-07-20	0.30-0.34 meter	68.354438 N 19.046693 E	5.7	SAMPLE COLLECTION: Sample was immediately flash-frozen in liquid nitrogen (LN). NUCLEIC ACID EXTRACTION: Standard (S) - a modified Mobio PowerMax Soil DNA/RNA isolation kit (Qiagen Cat# 12966-10). This protocol has been used from 2010-present for multi-omics studies by several sequential US-based projects (IsoGenie: DOE grant #s DE-SC0004632, DE-SC0010580, & DE-SC0016440; and EMERGE: NSF grant # …
Garnello.201607_AJE_1_10to14.LN_S_1	Garnello.201607_AJE_1_10to14.LN_S_1 (alternate names: MC E-10-14 LN-S-1, SB6395_J1514)	2016-07-20	0.10-0.14 meter	68.354433 N 19.046598 E	5	SAMPLE COLLECTION: Sample was immediately flash-frozen in liquid nitrogen (LN). NUCLEIC ACID EXTRACTION: Standard (S) - a modified Mobio PowerMax Soil DNA/RNA isolation kit (Qiagen Cat# 12966-10). This protocol has been used from 2010-present for multi-omics studies by several sequential US-based projects (IsoGenie: DOE grant #s DE-SC0004632, DE-SC0010580, & DE-SC0016440; and EMERGE: NSF grant # …
Garnello.201607_AJE_1_10to14.LN_S_2	Garnello.201607_AJE_1_10to14.LN_S_2 (alternate names: MC E-10-14 LN-S-2, SB6396_J1514)	2016-07-20	0.10-0.14 meter	68.354433 N 19.046598 E	5	SAMPLE COLLECTION: Sample was immediately flash-frozen in liquid nitrogen (LN). NUCLEIC ACID EXTRACTION: Standard (S) - a modified Mobio PowerMax Soil DNA/RNA isolation kit (Qiagen Cat# 12966-10). This protocol has been used from 2010-present for multi-omics studies by several sequential US-based projects (IsoGenie: DOE grant #s DE-SC0004632, DE-SC0010580, & DE-SC0016440; and EMERGE: NSF grant # …
Garnello.201607_AJE_1_10to14.LN_S_3	Garnello.201607_AJE_1_10to14.LN_S_3 (alternate names: MC E-10-14 LN-S-3, SB6397_J1514)	2016-07-20	0.10-0.14 meter	68.354433 N 19.046598 E	5	SAMPLE COLLECTION: Sample was immediately flash-frozen in liquid nitrogen (LN). NUCLEIC ACID EXTRACTION: Standard (S) - a modified Mobio PowerMax Soil DNA/RNA isolation kit (Qiagen Cat# 12966-10). This protocol has been used from 2010-present for multi-omics studies by several sequential US-based projects (IsoGenie: DOE grant #s DE-SC0004632, DE-SC0010580, & DE-SC0016440; and EMERGE: NSF grant # …
Garnello.201607_AJE_1_30to34.LN_S_1	Garnello.201607_AJE_1_30to34.LN_S_1 (alternate names: MC E-30-34 LN-S-1, SB6398_J1514)	2016-07-20	0.30-0.34 meter	68.354433 N 19.046598 E	5.3	SAMPLE COLLECTION: Sample was immediately flash-frozen in liquid nitrogen (LN). NUCLEIC ACID EXTRACTION: Standard (S) - a modified Mobio PowerMax Soil DNA/RNA isolation kit (Qiagen Cat# 12966-10). This protocol has been used from 2010-present for multi-omics studies by several sequential US-based projects (IsoGenie: DOE grant #s DE-SC0004632, DE-SC0010580, & DE-SC0016440; and EMERGE: NSF grant # …
Garnello.201607_AJE_1_30to34.LN_S_2	Garnello.201607_AJE_1_30to34.LN_S_2 (alternate names: MC E-30-34 LN-S-2, SB6399_J1514)	2016-07-20	0.30-0.34 meter	68.354433 N 19.046598 E	5.3	SAMPLE COLLECTION: Sample was immediately flash-frozen in liquid nitrogen (LN). NUCLEIC ACID EXTRACTION: Standard (S) - a modified Mobio PowerMax Soil DNA/RNA isolation kit (Qiagen Cat# 12966-10). This protocol has been used from 2010-present for multi-omics studies by several sequential US-based projects (IsoGenie: DOE grant #s DE-SC0004632, DE-SC0010580, & DE-SC0016440; and EMERGE: NSF grant # …
Garnello.201607_AJE_1_30to34.LN_S_3	Garnello.201607_AJE_1_30to34.LN_S_3 (alternate names: MC E-30-34 LN-S-3, SB6400_J1514)	2016-07-20	0.30-0.34 meter	68.354433 N 19.046598 E	5.3	SAMPLE COLLECTION: Sample was immediately flash-frozen in liquid nitrogen (LN). NUCLEIC ACID EXTRACTION: Standard (S) - a modified Mobio PowerMax Soil DNA/RNA isolation kit (Qiagen Cat# 12966-10). This protocol has been used from 2010-present for multi-omics studies by several sequential US-based projects (IsoGenie: DOE grant #s DE-SC0004632, DE-SC0010580, & DE-SC0016440; and EMERGE: NSF grant # …
Garnello.201607_AJP_1_10to14.LG_PSH_1	Garnello.201607_AJP_1_10to14.LG_PSH_1 (alternate names: MC P-10-14 LG-PSH-1, SB6401_J1514)	2016-07-20	0.10-0.14 meter	68.354513 N 19.046747 E		SAMPLE COLLECTION: ~12 ml of LifeGuard buffer (Qiagen) (LG) was added to the tube, followed by vigorous hand shaking to achieve a thorough mixture of LG and peat. NUCLEIC ACID EXTRACTION: PowerMax Soil DNA Isolation kit - high humic acid protocol (PSH) (Qiagen Cat# 12988-10HH)
Garnello.201607_AJP_1_10to14.LG_PSH_2	Garnello.201607_AJP_1_10to14.LG_PSH_2 (alternate names: MC P-10-14 LG-PSH-2, SB6402_J1514)	2016-07-20	0.10-0.14 meter	68.354513 N 19.046747 E		SAMPLE COLLECTION: ~12 ml of LifeGuard buffer (Qiagen) (LG) was added to the tube, followed by vigorous hand shaking to achieve a thorough mixture of LG and peat. NUCLEIC ACID EXTRACTION: PowerMax Soil DNA Isolation kit - high humic acid protocol (PSH) (Qiagen Cat# 12988-10HH)
Garnello.201607_AJP_1_10to14.LG_PSH_3	Garnello.201607_AJP_1_10to14.LG_PSH_3 (alternate names: MC P-10-14 LG-PSH-3, SB6403_J1514)	2016-07-20	0.10-0.14 meter	68.354513 N 19.046747 E		SAMPLE COLLECTION: ~12 ml of LifeGuard buffer (Qiagen) (LG) was added to the tube, followed by vigorous hand shaking to achieve a thorough mixture of LG and peat. NUCLEIC ACID EXTRACTION: PowerMax Soil DNA Isolation kit - high humic acid protocol (PSH) (Qiagen Cat# 12988-10HH)
Garnello.201607_AJP_1_30to34.LG_PSH_1	Garnello.201607_AJP_1_30to34.LG_PSH_1 (alternate names: MC P-30-34 LG-PSH-1, SB6404_J1514)	2016-07-20	0.30-0.34 meter	68.354513 N 19.046747 E		SAMPLE COLLECTION: ~12 ml of LifeGuard buffer (Qiagen) (LG) was added to the tube, followed by vigorous hand shaking to achieve a thorough mixture of LG and peat. NUCLEIC ACID EXTRACTION: PowerMax Soil DNA Isolation kit - high humic acid protocol (PSH) (Qiagen Cat# 12988-10HH)
Garnello.201607_AJP_1_30to34.LG_PSH_2	Garnello.201607_AJP_1_30to34.LG_PSH_2 (alternate names: MC P-30-34 LG-PSH-2, SB6405_J1514)	2016-07-20	0.30-0.34 meter	68.354513 N 19.046747 E		SAMPLE COLLECTION: ~12 ml of LifeGuard buffer (Qiagen) (LG) was added to the tube, followed by vigorous hand shaking to achieve a thorough mixture of LG and peat. NUCLEIC ACID EXTRACTION: PowerMax Soil DNA Isolation kit - high humic acid protocol (PSH) (Qiagen Cat# 12988-10HH)
Garnello.201607_AJP_1_30to34.LG_PSH_3	Garnello.201607_AJP_1_30to34.LG_PSH_3 (alternate names: MC P-30-34 LG-PSH-3, SB6406_J1514)	2016-07-20	0.30-0.34 meter	68.354513 N 19.046747 E		SAMPLE COLLECTION: ~12 ml of LifeGuard buffer (Qiagen) (LG) was added to the tube, followed by vigorous hand shaking to achieve a thorough mixture of LG and peat. NUCLEIC ACID EXTRACTION: PowerMax Soil DNA Isolation kit - high humic acid protocol (PSH) (Qiagen Cat# 12988-10HH)
Garnello.201607_AJS_1_10to14.LG_PSH_1	Garnello.201607_AJS_1_10to14.LG_PSH_1 (alternate names: MC S-10-14 LG-PSH-1, SB6407_J1514)	2016-07-20	0.10-0.14 meter	68.354438 N 19.046693 E	5	SAMPLE COLLECTION: ~12 ml of LifeGuard buffer (Qiagen) (LG) was added to the tube, followed by vigorous hand shaking to achieve a thorough mixture of LG and peat. NUCLEIC ACID EXTRACTION: PowerMax Soil DNA Isolation kit - high humic acid protocol (PSH) (Qiagen Cat# 12988-10HH)
Garnello.201607_AJS_1_10to14.LG_PSH_2	Garnello.201607_AJS_1_10to14.LG_PSH_2 (alternate names: MC S-10-14 LG-PSH-2, SB6408_J1514)	2016-07-20	0.10-0.14 meter	68.354438 N 19.046693 E	5	SAMPLE COLLECTION: ~12 ml of LifeGuard buffer (Qiagen) (LG) was added to the tube, followed by vigorous hand shaking to achieve a thorough mixture of LG and peat. NUCLEIC ACID EXTRACTION: PowerMax Soil DNA Isolation kit - high humic acid protocol (PSH) (Qiagen Cat# 12988-10HH)
Garnello.201607_AJS_1_10to14.LG_PSH_3	Garnello.201607_AJS_1_10to14.LG_PSH_3 (alternate names: MC S-10-14 LG-PSH-3, SB6409_J1514)	2016-07-20	0.10-0.14 meter	68.354438 N 19.046693 E	5	SAMPLE COLLECTION: ~12 ml of LifeGuard buffer (Qiagen) (LG) was added to the tube, followed by vigorous hand shaking to achieve a thorough mixture of LG and peat. NUCLEIC ACID EXTRACTION: PowerMax Soil DNA Isolation kit - high humic acid protocol (PSH) (Qiagen Cat# 12988-10HH)
Garnello.201607_AJS_1_30to34.LG_PSH_1	Garnello.201607_AJS_1_30to34.LG_PSH_1 (alternate names: MC S-30-34 LG-PSH-1, SB6410_J1514)	2016-07-20	0.30-0.34 meter	68.354438 N 19.046693 E	5.7	SAMPLE COLLECTION: ~12 ml of LifeGuard buffer (Qiagen) (LG) was added to the tube, followed by vigorous hand shaking to achieve a thorough mixture of LG and peat. NUCLEIC ACID EXTRACTION: PowerMax Soil DNA Isolation kit - high humic acid protocol (PSH) (Qiagen Cat# 12988-10HH)
Garnello.201607_AJS_1_30to34.LG_PSH_2	Garnello.201607_AJS_1_30to34.LG_PSH_2 (alternate names: MC S-30-34 LG-PSH-2, SB6411_J1514)	2016-07-20	0.30-0.34 meter	68.354438 N 19.046693 E	5.7	SAMPLE COLLECTION: ~12 ml of LifeGuard buffer (Qiagen) (LG) was added to the tube, followed by vigorous hand shaking to achieve a thorough mixture of LG and peat. NUCLEIC ACID EXTRACTION: PowerMax Soil DNA Isolation kit - high humic acid protocol (PSH) (Qiagen Cat# 12988-10HH)
Garnello.201607_AJS_1_30to34.LG_PSH_3	Garnello.201607_AJS_1_30to34.LG_PSH_3 (alternate names: MC S-30-34 LG-PSH-3, SB6412_J1514)	2016-07-20	0.30-0.34 meter	68.354438 N 19.046693 E	5.7	SAMPLE COLLECTION: ~12 ml of LifeGuard buffer (Qiagen) (LG) was added to the tube, followed by vigorous hand shaking to achieve a thorough mixture of LG and peat. NUCLEIC ACID EXTRACTION: PowerMax Soil DNA Isolation kit - high humic acid protocol (PSH) (Qiagen Cat# 12988-10HH)
Garnello.201607_AJE_1_10to14.LG_PSH_1	Garnello.201607_AJE_1_10to14.LG_PSH_1 (alternate names: MC E-10-14 LG-PSH-1, SB6413_J1514)	2016-07-20	0.10-0.14 meter	68.354433 N 19.046598 E	5	SAMPLE COLLECTION: ~12 ml of LifeGuard buffer (Qiagen) (LG) was added to the tube, followed by vigorous hand shaking to achieve a thorough mixture of LG and peat. NUCLEIC ACID EXTRACTION: PowerMax Soil DNA Isolation kit - high humic acid protocol (PSH) (Qiagen Cat# 12988-10HH)
Garnello.201607_AJE_1_10to14.LG_PSH_2	Garnello.201607_AJE_1_10to14.LG_PSH_2 (alternate names: MC E-10-14 LG-PSH-2, SB6414_J1514)	2016-07-20	0.10-0.14 meter	68.354433 N 19.046598 E	5	SAMPLE COLLECTION: ~12 ml of LifeGuard buffer (Qiagen) (LG) was added to the tube, followed by vigorous hand shaking to achieve a thorough mixture of LG and peat. NUCLEIC ACID EXTRACTION: PowerMax Soil DNA Isolation kit - high humic acid protocol (PSH) (Qiagen Cat# 12988-10HH)
Garnello.201607_AJE_1_10to14.LG_PSH_3	Garnello.201607_AJE_1_10to14.LG_PSH_3 (alternate names: MC E-10-14 LG-PSH-3, SB6415_J1514)	2016-07-20	0.10-0.14 meter	68.354433 N 19.046598 E	5	SAMPLE COLLECTION: ~12 ml of LifeGuard buffer (Qiagen) (LG) was added to the tube, followed by vigorous hand shaking to achieve a thorough mixture of LG and peat. NUCLEIC ACID EXTRACTION: PowerMax Soil DNA Isolation kit - high humic acid protocol (PSH) (Qiagen Cat# 12988-10HH)
Garnello.201607_AJE_1_30to34.LG_PSH_1	Garnello.201607_AJE_1_30to34.LG_PSH_1 (alternate names: MC E-30-34 LG-PSH-1, SB6416_J1514)	2016-07-20	0.30-0.34 meter	68.354433 N 19.046598 E	5.3	SAMPLE COLLECTION: ~12 ml of LifeGuard buffer (Qiagen) (LG) was added to the tube, followed by vigorous hand shaking to achieve a thorough mixture of LG and peat. NUCLEIC ACID EXTRACTION: PowerMax Soil DNA Isolation kit - high humic acid protocol (PSH) (Qiagen Cat# 12988-10HH)
Garnello.201607_AJE_1_30to34.LG_PSH_2	Garnello.201607_AJE_1_30to34.LG_PSH_2 (alternate names: MC E-30-34 LG-PSH-2, SB6417_J1514)	2016-07-20	0.30-0.34 meter	68.354433 N 19.046598 E	5.3	SAMPLE COLLECTION: ~12 ml of LifeGuard buffer (Qiagen) (LG) was added to the tube, followed by vigorous hand shaking to achieve a thorough mixture of LG and peat. NUCLEIC ACID EXTRACTION: PowerMax Soil DNA Isolation kit - high humic acid protocol (PSH) (Qiagen Cat# 12988-10HH)
Garnello.201607_AJE_1_30to34.LG_PSH_3	Garnello.201607_AJE_1_30to34.LG_PSH_3 (alternate names: MC E-30-34 LG-PSH-3, SB6418_J1514)	2016-07-20	0.30-0.34 meter	68.354433 N 19.046598 E	5.3	SAMPLE COLLECTION: ~12 ml of LifeGuard buffer (Qiagen) (LG) was added to the tube, followed by vigorous hand shaking to achieve a thorough mixture of LG and peat. NUCLEIC ACID EXTRACTION: PowerMax Soil DNA Isolation kit - high humic acid protocol (PSH) (Qiagen Cat# 12988-10HH)
Garnello.201607_AJP_1_10to14.LG_S_1	Garnello.201607_AJP_1_10to14.LG_S_1 (alternate names: MC P-10-14 LG-S-1, SB6419_J1514)	2016-07-20	0.10-0.14 meter	68.354513 N 19.046747 E		SAMPLE COLLECTION: ~12 ml of LifeGuard buffer (Qiagen) (LG) was added to the tube, followed by vigorous hand shaking to achieve a thorough mixture of LG and peat. NUCLEIC ACID EXTRACTION: Standard (S) - a modified Mobio PowerMax Soil DNA/RNA isolation kit (Qiagen Cat# 12966-10). This protocol has been used from 2010-present for multi-omics studies by several sequential US-based projects (IsoGenie…
Garnello.201607_AJP_1_10to14.LG_S_2	Garnello.201607_AJP_1_10to14.LG_S_2 (alternate names: MC P-10-14 LG-S-2, SB6420_J1514)	2016-07-20	0.10-0.14 meter	68.354513 N 19.046747 E		SAMPLE COLLECTION: ~12 ml of LifeGuard buffer (Qiagen) (LG) was added to the tube, followed by vigorous hand shaking to achieve a thorough mixture of LG and peat. NUCLEIC ACID EXTRACTION: Standard (S) - a modified Mobio PowerMax Soil DNA/RNA isolation kit (Qiagen Cat# 12966-10). This protocol has been used from 2010-present for multi-omics studies by several sequential US-based projects (IsoGenie…
Garnello.201607_AJP_1_10to14.LG_S_3	Garnello.201607_AJP_1_10to14.LG_S_3 (alternate names: MC P-10-14 LG-S-3, SB6421_J1514)	2016-07-20	0.10-0.14 meter	68.354513 N 19.046747 E		SAMPLE COLLECTION: ~12 ml of LifeGuard buffer (Qiagen) (LG) was added to the tube, followed by vigorous hand shaking to achieve a thorough mixture of LG and peat. NUCLEIC ACID EXTRACTION: Standard (S) - a modified Mobio PowerMax Soil DNA/RNA isolation kit (Qiagen Cat# 12966-10). This protocol has been used from 2010-present for multi-omics studies by several sequential US-based projects (IsoGenie…
Garnello.201607_AJP_1_30to34.LG_S_1	Garnello.201607_AJP_1_30to34.LG_S_1 (alternate names: MC P-30-34 LG-S-1, SB6425_J1514)	2016-07-20	0.30-0.34 meter	68.354513 N 19.046747 E		SAMPLE COLLECTION: ~12 ml of LifeGuard buffer (Qiagen) (LG) was added to the tube, followed by vigorous hand shaking to achieve a thorough mixture of LG and peat. NUCLEIC ACID EXTRACTION: Standard (S) - a modified Mobio PowerMax Soil DNA/RNA isolation kit (Qiagen Cat# 12966-10). This protocol has been used from 2010-present for multi-omics studies by several sequential US-based projects (IsoGenie…
Garnello.201607_AJP_1_30to34.LG_S_2	Garnello.201607_AJP_1_30to34.LG_S_2 (alternate names: MC P-30-34 LG-S-2, SB6426_J1514)	2016-07-20	0.30-0.34 meter	68.354513 N 19.046747 E		SAMPLE COLLECTION: ~12 ml of LifeGuard buffer (Qiagen) (LG) was added to the tube, followed by vigorous hand shaking to achieve a thorough mixture of LG and peat. NUCLEIC ACID EXTRACTION: Standard (S) - a modified Mobio PowerMax Soil DNA/RNA isolation kit (Qiagen Cat# 12966-10). This protocol has been used from 2010-present for multi-omics studies by several sequential US-based projects (IsoGenie…
Garnello.201607_AJP_1_30to34.LG_S_3	Garnello.201607_AJP_1_30to34.LG_S_3 (alternate names: MC P-30-34 LG-S-3, SB6427_J1514)	2016-07-20	0.30-0.34 meter	68.354513 N 19.046747 E		SAMPLE COLLECTION: ~12 ml of LifeGuard buffer (Qiagen) (LG) was added to the tube, followed by vigorous hand shaking to achieve a thorough mixture of LG and peat. NUCLEIC ACID EXTRACTION: Standard (S) - a modified Mobio PowerMax Soil DNA/RNA isolation kit (Qiagen Cat# 12966-10). This protocol has been used from 2010-present for multi-omics studies by several sequential US-based projects (IsoGenie…
Garnello.201607_AJS_1_10to14.LG_S_1	Garnello.201607_AJS_1_10to14.LG_S_1 (alternate names: MC S-10-14 LG-S-1, SB6431_J1514)	2016-07-20	0.10-0.14 meter	68.354438 N 19.046693 E	5	SAMPLE COLLECTION: ~12 ml of LifeGuard buffer (Qiagen) (LG) was added to the tube, followed by vigorous hand shaking to achieve a thorough mixture of LG and peat. NUCLEIC ACID EXTRACTION: Standard (S) - a modified Mobio PowerMax Soil DNA/RNA isolation kit (Qiagen Cat# 12966-10). This protocol has been used from 2010-present for multi-omics studies by several sequential US-based projects (IsoGenie…
Garnello.201607_AJS_1_10to14.LG_S_2	Garnello.201607_AJS_1_10to14.LG_S_2 (alternate names: MC S-10-14 LG-S-2, SB6432_J1514)	2016-07-20	0.10-0.14 meter	68.354438 N 19.046693 E	5	SAMPLE COLLECTION: ~12 ml of LifeGuard buffer (Qiagen) (LG) was added to the tube, followed by vigorous hand shaking to achieve a thorough mixture of LG and peat. NUCLEIC ACID EXTRACTION: Standard (S) - a modified Mobio PowerMax Soil DNA/RNA isolation kit (Qiagen Cat# 12966-10). This protocol has been used from 2010-present for multi-omics studies by several sequential US-based projects (IsoGenie…
Garnello.201607_AJS_1_10to14.LG_S_3	Garnello.201607_AJS_1_10to14.LG_S_3 (alternate names: MC S-10-14 LG-S-3, SB6433_J1514)	2016-07-20	0.10-0.14 meter	68.354438 N 19.046693 E	5	SAMPLE COLLECTION: ~12 ml of LifeGuard buffer (Qiagen) (LG) was added to the tube, followed by vigorous hand shaking to achieve a thorough mixture of LG and peat. NUCLEIC ACID EXTRACTION: Standard (S) - a modified Mobio PowerMax Soil DNA/RNA isolation kit (Qiagen Cat# 12966-10). This protocol has been used from 2010-present for multi-omics studies by several sequential US-based projects (IsoGenie…
Garnello.201607_AJS_1_30to34.LG_S_1	Garnello.201607_AJS_1_30to34.LG_S_1 (alternate names: MC S-30-34 LG-S-1, SB6437_J1514)	2016-07-20	0.30-0.34 meter	68.354438 N 19.046693 E	5.7	SAMPLE COLLECTION: ~12 ml of LifeGuard buffer (Qiagen) (LG) was added to the tube, followed by vigorous hand shaking to achieve a thorough mixture of LG and peat. NUCLEIC ACID EXTRACTION: Standard (S) - a modified Mobio PowerMax Soil DNA/RNA isolation kit (Qiagen Cat# 12966-10). This protocol has been used from 2010-present for multi-omics studies by several sequential US-based projects (IsoGenie…
Garnello.201607_AJS_1_30to34.LG_S_2	Garnello.201607_AJS_1_30to34.LG_S_2 (alternate names: MC S-30-34 LG-S-2, SB6438_J1514)	2016-07-20	0.30-0.34 meter	68.354438 N 19.046693 E	5.7	SAMPLE COLLECTION: ~12 ml of LifeGuard buffer (Qiagen) (LG) was added to the tube, followed by vigorous hand shaking to achieve a thorough mixture of LG and peat. NUCLEIC ACID EXTRACTION: Standard (S) - a modified Mobio PowerMax Soil DNA/RNA isolation kit (Qiagen Cat# 12966-10). This protocol has been used from 2010-present for multi-omics studies by several sequential US-based projects (IsoGenie…
Garnello.201607_AJS_1_30to34.LG_S_3	Garnello.201607_AJS_1_30to34.LG_S_3 (alternate names: MC S-30-34 LG-S-3, SB6439_J1514)	2016-07-20	0.30-0.34 meter	68.354438 N 19.046693 E	5.7	SAMPLE COLLECTION: ~12 ml of LifeGuard buffer (Qiagen) (LG) was added to the tube, followed by vigorous hand shaking to achieve a thorough mixture of LG and peat. NUCLEIC ACID EXTRACTION: Standard (S) - a modified Mobio PowerMax Soil DNA/RNA isolation kit (Qiagen Cat# 12966-10). This protocol has been used from 2010-present for multi-omics studies by several sequential US-based projects (IsoGenie…
Garnello.201607_AJE_1_10to14.LG_S_1	Garnello.201607_AJE_1_10to14.LG_S_1 (alternate names: MC E-10-14 LG-S-1, SB6443_J1514)	2016-07-20	0.10-0.14 meter	68.354433 N 19.046598 E	5	SAMPLE COLLECTION: ~12 ml of LifeGuard buffer (Qiagen) (LG) was added to the tube, followed by vigorous hand shaking to achieve a thorough mixture of LG and peat. NUCLEIC ACID EXTRACTION: Standard (S) - a modified Mobio PowerMax Soil DNA/RNA isolation kit (Qiagen Cat# 12966-10). This protocol has been used from 2010-present for multi-omics studies by several sequential US-based projects (IsoGenie…
Garnello.201607_AJE_1_10to14.LG_S_2	Garnello.201607_AJE_1_10to14.LG_S_2 (alternate names: MC E-10-14 LG-S-2, SB6444_J1514)	2016-07-20	0.10-0.14 meter	68.354433 N 19.046598 E	5	SAMPLE COLLECTION: ~12 ml of LifeGuard buffer (Qiagen) (LG) was added to the tube, followed by vigorous hand shaking to achieve a thorough mixture of LG and peat. NUCLEIC ACID EXTRACTION: Standard (S) - a modified Mobio PowerMax Soil DNA/RNA isolation kit (Qiagen Cat# 12966-10). This protocol has been used from 2010-present for multi-omics studies by several sequential US-based projects (IsoGenie…
Garnello.201607_AJE_1_10to14.LG_S_3	Garnello.201607_AJE_1_10to14.LG_S_3 (alternate names: MC E-10-14 LG-S-3, SB6445_J1514)	2016-07-20	0.10-0.14 meter	68.354433 N 19.046598 E	5	SAMPLE COLLECTION: ~12 ml of LifeGuard buffer (Qiagen) (LG) was added to the tube, followed by vigorous hand shaking to achieve a thorough mixture of LG and peat. NUCLEIC ACID EXTRACTION: Standard (S) - a modified Mobio PowerMax Soil DNA/RNA isolation kit (Qiagen Cat# 12966-10). This protocol has been used from 2010-present for multi-omics studies by several sequential US-based projects (IsoGenie…
Garnello.201607_AJE_1_30to34.LG_S_1	Garnello.201607_AJE_1_30to34.LG_S_1 (alternate names: MC E-30-34 LG-S-1, SB6449_J1514)	2016-07-20	0.30-0.34 meter	68.354433 N 19.046598 E	5.3	SAMPLE COLLECTION: ~12 ml of LifeGuard buffer (Qiagen) (LG) was added to the tube, followed by vigorous hand shaking to achieve a thorough mixture of LG and peat. NUCLEIC ACID EXTRACTION: Standard (S) - a modified Mobio PowerMax Soil DNA/RNA isolation kit (Qiagen Cat# 12966-10). This protocol has been used from 2010-present for multi-omics studies by several sequential US-based projects (IsoGenie…
Garnello.201607_AJE_1_30to34.LG_S_2	Garnello.201607_AJE_1_30to34.LG_S_2 (alternate names: MC E-30-34 LG-S-2, SB6450_J1514)	2016-07-20	0.30-0.34 meter	68.354433 N 19.046598 E	5.3	SAMPLE COLLECTION: ~12 ml of LifeGuard buffer (Qiagen) (LG) was added to the tube, followed by vigorous hand shaking to achieve a thorough mixture of LG and peat. NUCLEIC ACID EXTRACTION: Standard (S) - a modified Mobio PowerMax Soil DNA/RNA isolation kit (Qiagen Cat# 12966-10). This protocol has been used from 2010-present for multi-omics studies by several sequential US-based projects (IsoGenie…
Garnello.201607_AJE_1_30to34.LG_S_3	Garnello.201607_AJE_1_30to34.LG_S_3 (alternate names: MC E-30-34 LG-S-3, SB6451_J1514)	2016-07-20	0.30-0.34 meter	68.354433 N 19.046598 E	5.3	SAMPLE COLLECTION: ~12 ml of LifeGuard buffer (Qiagen) (LG) was added to the tube, followed by vigorous hand shaking to achieve a thorough mixture of LG and peat. NUCLEIC ACID EXTRACTION: Standard (S) - a modified Mobio PowerMax Soil DNA/RNA isolation kit (Qiagen Cat# 12966-10). This protocol has been used from 2010-present for multi-omics studies by several sequential US-based projects (IsoGenie…
Garnello.201907_AJS_1_10to14.LG_SR_1	Garnello.201907_AJS_1_10to14.LG_SR_1 (alternate name: 719 MC S-10-14 LG-SR-1)	2019-07-24	0.10-0.14 meter	68.354358 N 19.047167 E		SAMPLE COLLECTION: ~12 ml of LifeGuard buffer (Qiagen) (LG) was added to the tube, followed by vigorous hand shaking to achieve a thorough mixture of LG and peat. NUCLEIC ACID EXTRACTION: Standard with alternative reagents (SR) - Identical to the 'S' method, except that the reagents used in the original kit were replaced with identical alternative reagents provided by Mobio/Qiagen. Specifically, …
Garnello.201907_AJS_1_10to14.LG_SR_2	Garnello.201907_AJS_1_10to14.LG_SR_2 (alternate name: 719 MC S-10-14 LG-SR-2)	2019-07-24	0.10-0.14 meter	68.354358 N 19.047167 E		SAMPLE COLLECTION: ~12 ml of LifeGuard buffer (Qiagen) (LG) was added to the tube, followed by vigorous hand shaking to achieve a thorough mixture of LG and peat. NUCLEIC ACID EXTRACTION: Standard with alternative reagents (SR) - Identical to the 'S' method, except that the reagents used in the original kit were replaced with identical alternative reagents provided by Mobio/Qiagen. Specifically, …
Garnello.201907_AJS_1_10to14.LG_SR_3	Garnello.201907_AJS_1_10to14.LG_SR_3 (alternate name: 719 MC S-10-14 LG-SR-3)	2019-07-24	0.10-0.14 meter	68.354358 N 19.047167 E		SAMPLE COLLECTION: ~12 ml of LifeGuard buffer (Qiagen) (LG) was added to the tube, followed by vigorous hand shaking to achieve a thorough mixture of LG and peat. NUCLEIC ACID EXTRACTION: Standard with alternative reagents (SR) - Identical to the 'S' method, except that the reagents used in the original kit were replaced with identical alternative reagents provided by Mobio/Qiagen. Specifically, …
Garnello.201907_AJS_1_30to34.LG_SR_1	Garnello.201907_AJS_1_30to34.LG_SR_1 (alternate name: 719 MC S-30-34 LG-SR-1)	2019-07-24	0.30-0.34 meter	68.354358 N 19.047167 E		SAMPLE COLLECTION: ~12 ml of LifeGuard buffer (Qiagen) (LG) was added to the tube, followed by vigorous hand shaking to achieve a thorough mixture of LG and peat. NUCLEIC ACID EXTRACTION: Standard with alternative reagents (SR) - Identical to the 'S' method, except that the reagents used in the original kit were replaced with identical alternative reagents provided by Mobio/Qiagen. Specifically, …
Garnello.201907_AJS_1_30to34.LG_SR_2	Garnello.201907_AJS_1_30to34.LG_SR_2 (alternate name: 719 MC S-30-34 LG-SR-2)	2019-07-24	0.30-0.34 meter	68.354358 N 19.047167 E		SAMPLE COLLECTION: ~12 ml of LifeGuard buffer (Qiagen) (LG) was added to the tube, followed by vigorous hand shaking to achieve a thorough mixture of LG and peat. NUCLEIC ACID EXTRACTION: Standard with alternative reagents (SR) - Identical to the 'S' method, except that the reagents used in the original kit were replaced with identical alternative reagents provided by Mobio/Qiagen. Specifically, …
Garnello.201907_AJS_1_30to34.LG_SR_3	Garnello.201907_AJS_1_30to34.LG_SR_3 (alternate name: 719 MC S-30-34 LG-SR-3)	2019-07-24	0.30-0.34 meter	68.354358 N 19.047167 E		SAMPLE COLLECTION: ~12 ml of LifeGuard buffer (Qiagen) (LG) was added to the tube, followed by vigorous hand shaking to achieve a thorough mixture of LG and peat. NUCLEIC ACID EXTRACTION: Standard with alternative reagents (SR) - Identical to the 'S' method, except that the reagents used in the original kit were replaced with identical alternative reagents provided by Mobio/Qiagen. Specifically, …
Garnello.201907_AJS_1_10to14.NA_SR_1	Garnello.201907_AJS_1_10to14.NA_SR_1 (alternate name: 719 MC S-10-14 NA-SR-1)	2019-07-24	0.10-0.14 meter	68.354358 N 19.047167 E		SAMPLE COLLECTION: Sample was placed naked (NA) on ice. NUCLEIC ACID EXTRACTION: Standard with alternative reagents (SR) - Identical to the 'S' method, except that the reagents used in the original kit were replaced with identical alternative reagents provided by Mobio/Qiagen. Specifically, RD1 was replaced with PM1, RD2 with C3, RD3 with PM4, RD4 with C5, and RD5 with DEPC-treated water.
Garnello.201907_AJS_1_10to14.NA_SR_2	Garnello.201907_AJS_1_10to14.NA_SR_2 (alternate name: 719 MC S-10-14 NA-SR-2)	2019-07-24	0.10-0.14 meter	68.354358 N 19.047167 E		SAMPLE COLLECTION: Sample was placed naked (NA) on ice. NUCLEIC ACID EXTRACTION: Standard with alternative reagents (SR) - Identical to the 'S' method, except that the reagents used in the original kit were replaced with identical alternative reagents provided by Mobio/Qiagen. Specifically, RD1 was replaced with PM1, RD2 with C3, RD3 with PM4, RD4 with C5, and RD5 with DEPC-treated water.
Garnello.201907_AJS_1_10to14.NA_SR_3	Garnello.201907_AJS_1_10to14.NA_SR_3 (alternate name: 719 MC S-10-14 NA-SR-3)	2019-07-24	0.10-0.14 meter	68.354358 N 19.047167 E		SAMPLE COLLECTION: Sample was placed naked (NA) on ice. NUCLEIC ACID EXTRACTION: Standard with alternative reagents (SR) - Identical to the 'S' method, except that the reagents used in the original kit were replaced with identical alternative reagents provided by Mobio/Qiagen. Specifically, RD1 was replaced with PM1, RD2 with C3, RD3 with PM4, RD4 with C5, and RD5 with DEPC-treated water.
Garnello.201907_AJS_1_30to34.NA_SR_1	Garnello.201907_AJS_1_30to34.NA_SR_1 (alternate name: 719 MC S-30-34 NA-SR-1)	2019-07-24	0.30-0.34 meter	68.354358 N 19.047167 E		SAMPLE COLLECTION: Sample was placed naked (NA) on ice. NUCLEIC ACID EXTRACTION: Standard with alternative reagents (SR) - Identical to the 'S' method, except that the reagents used in the original kit were replaced with identical alternative reagents provided by Mobio/Qiagen. Specifically, RD1 was replaced with PM1, RD2 with C3, RD3 with PM4, RD4 with C5, and RD5 with DEPC-treated water.
Garnello.201907_AJS_1_30to34.NA_SR_2	Garnello.201907_AJS_1_30to34.NA_SR_2 (alternate name: 719 MC S-30-34 NA-SR-2)	2019-07-24	0.30-0.34 meter	68.354358 N 19.047167 E		SAMPLE COLLECTION: Sample was placed naked (NA) on ice. NUCLEIC ACID EXTRACTION: Standard with alternative reagents (SR) - Identical to the 'S' method, except that the reagents used in the original kit were replaced with identical alternative reagents provided by Mobio/Qiagen. Specifically, RD1 was replaced with PM1, RD2 with C3, RD3 with PM4, RD4 with C5, and RD5 with DEPC-treated water.
Garnello.201907_AJS_1_30to34.NA_SR_3	Garnello.201907_AJS_1_30to34.NA_SR_3 (alternate name: 719 MC S-30-34 NA-SR-3)	2019-07-24	0.30-0.34 meter	68.354358 N 19.047167 E		SAMPLE COLLECTION: Sample was placed naked (NA) on ice. NUCLEIC ACID EXTRACTION: Standard with alternative reagents (SR) - Identical to the 'S' method, except that the reagents used in the original kit were replaced with identical alternative reagents provided by Mobio/Qiagen. Specifically, RD1 was replaced with PM1, RD2 with C3, RD3 with PM4, RD4 with C5, and RD5 with DEPC-treated water.
Garnello.201907_AJS_1_10to14.LN_SR_1	Garnello.201907_AJS_1_10to14.LN_SR_1 (alternate name: 719 MC S-10-14 LN-SR-1)	2019-07-24	0.10-0.14 meter	68.354358 N 19.047167 E		SAMPLE COLLECTION: Sample was immediately flash-frozen in liquid nitrogen (LN). NUCLEIC ACID EXTRACTION: Standard with alternative reagents (SR) - Identical to the 'S' method, except that the reagents used in the original kit were replaced with identical alternative reagents provided by Mobio/Qiagen. Specifically, RD1 was replaced with PM1, RD2 with C3, RD3 with PM4, RD4 with C5, and RD5 with DEP…
Garnello.201907_AJS_1_10to14.LN_SR_2	Garnello.201907_AJS_1_10to14.LN_SR_2 (alternate name: 719 MC S-10-14 LN-SR-2)	2019-07-24	0.10-0.14 meter	68.354358 N 19.047167 E		SAMPLE COLLECTION: Sample was immediately flash-frozen in liquid nitrogen (LN). NUCLEIC ACID EXTRACTION: Standard with alternative reagents (SR) - Identical to the 'S' method, except that the reagents used in the original kit were replaced with identical alternative reagents provided by Mobio/Qiagen. Specifically, RD1 was replaced with PM1, RD2 with C3, RD3 with PM4, RD4 with C5, and RD5 with DEP…
Garnello.201907_AJS_1_10to14.LN_SR_3	Garnello.201907_AJS_1_10to14.LN_SR_3 (alternate name: 719 MC S-10-14 LN-SR-3)	2019-07-24	0.10-0.14 meter	68.354358 N 19.047167 E		SAMPLE COLLECTION: Sample was immediately flash-frozen in liquid nitrogen (LN). NUCLEIC ACID EXTRACTION: Standard with alternative reagents (SR) - Identical to the 'S' method, except that the reagents used in the original kit were replaced with identical alternative reagents provided by Mobio/Qiagen. Specifically, RD1 was replaced with PM1, RD2 with C3, RD3 with PM4, RD4 with C5, and RD5 with DEP…
Garnello.201907_AJS_1_30to34.LN_SR_1	Garnello.201907_AJS_1_30to34.LN_SR_1 (alternate name: 719 MC S-30-34 LN-SR-1)	2019-07-24	0.30-0.34 meter	68.354358 N 19.047167 E		SAMPLE COLLECTION: Sample was immediately flash-frozen in liquid nitrogen (LN). NUCLEIC ACID EXTRACTION: Standard with alternative reagents (SR) - Identical to the 'S' method, except that the reagents used in the original kit were replaced with identical alternative reagents provided by Mobio/Qiagen. Specifically, RD1 was replaced with PM1, RD2 with C3, RD3 with PM4, RD4 with C5, and RD5 with DEP…
Garnello.201907_AJS_1_30to34.LN_SR_2	Garnello.201907_AJS_1_30to34.LN_SR_2 (alternate name: 719 MC S-30-34 LN-SR-2)	2019-07-24	0.30-0.34 meter	68.354358 N 19.047167 E		SAMPLE COLLECTION: Sample was immediately flash-frozen in liquid nitrogen (LN). NUCLEIC ACID EXTRACTION: Standard with alternative reagents (SR) - Identical to the 'S' method, except that the reagents used in the original kit were replaced with identical alternative reagents provided by Mobio/Qiagen. Specifically, RD1 was replaced with PM1, RD2 with C3, RD3 with PM4, RD4 with C5, and RD5 with DEP…
Garnello.201907_AJS_1_30to34.LN_SR_3	Garnello.201907_AJS_1_30to34.LN_SR_3 (alternate name: 719 MC S-30-34 LN-SR-3)	2019-07-24	0.30-0.34 meter	68.354358 N 19.047167 E		SAMPLE COLLECTION: Sample was immediately flash-frozen in liquid nitrogen (LN). NUCLEIC ACID EXTRACTION: Standard with alternative reagents (SR) - Identical to the 'S' method, except that the reagents used in the original kit were replaced with identical alternative reagents provided by Mobio/Qiagen. Specifically, RD1 was replaced with PM1, RD2 with C3, RD3 with PM4, RD4 with C5, and RD5 with DEP…
