# Supplementary material for: Impact of storage and extraction methods on peat soil microbiomes
Source: PeerJ journal article supplement (doi:10.7717/peerj.18745), 2024-12-23
Supplement: TableS2.xlsx [file TableS2.xlsx]

## Sheet: Table S2
Table S2: Sample Accession Information
Accession	Sample Name	SPUID	Organism	Tax ID
SAMN40302607	Garnello.201607_AJP_1_10to14.LG_SL_1	Garnello.201607_AJP_1_10to14.LG_SL_1	peat metagenome	1799672
SAMN40302608	Garnello.201607_AJP_1_10to14.LG_SL_2	Garnello.201607_AJP_1_10to14.LG_SL_2	peat metagenome	1799672
SAMN40302609	Garnello.201607_AJP_1_10to14.LG_SL_3	Garnello.201607_AJP_1_10to14.LG_SL_3	peat metagenome	1799672
SAMN40302610	Garnello.201607_AJP_1_30to34.LG_SL_1	Garnello.201607_AJP_1_30to34.LG_SL_1	peat metagenome	1799672
SAMN40302611	Garnello.201607_AJP_1_30to34.LG_SL_2	Garnello.201607_AJP_1_30to34.LG_SL_2	peat metagenome	1799672
SAMN40302612	Garnello.201607_AJP_1_30to34.LG_SL_3	Garnello.201607_AJP_1_30to34.LG_SL_3	peat metagenome	1799672
SAMN40302613	Garnello.201607_AJS_1_10to14.LG_SL_1	Garnello.201607_AJS_1_10to14.LG_SL_1	peat metagenome	1799672
SAMN40302614	Garnello.201607_AJS_1_10to14.LG_SL_2	Garnello.201607_AJS_1_10to14.LG_SL_2	peat metagenome	1799672
SAMN40302615	Garnello.201607_AJS_1_10to14.LG_SL_3	Garnello.201607_AJS_1_10to14.LG_SL_3	peat metagenome	1799672
SAMN40302616	Garnello.201607_AJS_1_30to34.LG_SL_1	Garnello.201607_AJS_1_30to34.LG_SL_1	peat metagenome	1799672
SAMN40302617	Garnello.201607_AJS_1_30to34.LG_SL_2	Garnello.201607_AJS_1_30to34.LG_SL_2	peat metagenome	1799672
SAMN40302618	Garnello.201607_AJS_1_30to34.LG_SL_3	Garnello.201607_AJS_1_30to34.LG_SL_3	peat metagenome	1799672
SAMN40302619	Garnello.201607_AJE_1_10to14.LG_SL_1	Garnello.201607_AJE_1_10to14.LG_SL_1	peat metagenome	1799672
SAMN40302620	Garnello.201607_AJE_1_10to14.LG_SL_2	Garnello.201607_AJE_1_10to14.LG_SL_2	peat metagenome	1799672
SAMN40302621	Garnello.201607_AJE_1_10to14.LG_SL_3	Garnello.201607_AJE_1_10to14.LG_SL_3	peat metagenome	1799672
SAMN40302622	Garnello.201607_AJE_1_30to34.LG_SL_1	Garnello.201607_AJE_1_30to34.LG_SL_1	peat metagenome	1799672
SAMN40302623	Garnello.201607_AJE_1_30to34.LG_SL_2	Garnello.201607_AJE_1_30to34.LG_SL_2	peat metagenome	1799672
SAMN40302624	Garnello.201607_AJE_1_30to34.LG_SL_3	Garnello.201607_AJE_1_30to34.LG_SL_3	peat metagenome	1799672
SAMN40302625	Garnello.201607_AJP_1_10to14.NA_PSP_1	Garnello.201607_AJP_1_10to14.NA_PSP_1	peat metagenome	1799672
SAMN40302626	Garnello.201607_AJP_1_10to14.NA_PSP_2	Garnello.201607_AJP_1_10to14.NA_PSP_2	peat metagenome	1799672
SAMN40302627	Garnello.201607_AJP_1_10to14.NA_PSP_3	Garnello.201607_AJP_1_10to14.NA_PSP_3	peat metagenome	1799672
SAMN40302628	Garnello.201607_AJP_1_30to34.NA_PSP_1	Garnello.201607_AJP_1_30to34.NA_PSP_1	peat metagenome	1799672
SAMN40302629	Garnello.201607_AJP_1_30to34.NA_PSP_2	Garnello.201607_AJP_1_30to34.NA_PSP_2	peat metagenome	1799672
SAMN40302630	Garnello.201607_AJP_1_30to34.NA_PSP_3	Garnello.201607_AJP_1_30to34.NA_PSP_3	peat metagenome	1799672
SAMN40302631	Garnello.201607_AJS_1_10to14.NA_PSP_1	Garnello.201607_AJS_1_10to14.NA_PSP_1	peat metagenome	1799672
SAMN40302632	Garnello.201607_AJS_1_10to14.NA_PSP_2	Garnello.201607_AJS_1_10to14.NA_PSP_2	peat metagenome	1799672
SAMN40302633	Garnello.201607_AJS_1_10to14.NA_PSP_3	Garnello.201607_AJS_1_10to14.NA_PSP_3	peat metagenome	1799672
SAMN40302634	Garnello.201607_AJS_1_30to34.NA_PSP_1	Garnello.201607_AJS_1_30to34.NA_PSP_1	peat metagenome	1799672
SAMN40302635	Garnello.201607_AJS_1_30to34.NA_PSP_2	Garnello.201607_AJS_1_30to34.NA_PSP_2	peat metagenome	1799672
SAMN40302636	Garnello.201607_AJS_1_30to34.NA_PSP_3	Garnello.201607_AJS_1_30to34.NA_PSP_3	peat metagenome	1799672
SAMN40302637	Garnello.201607_AJE_1_10to14.NA_PSP_1	Garnello.201607_AJE_1_10to14.NA_PSP_1	peat metagenome	1799672
SAMN40302638	Garnello.201607_AJE_1_10to14.NA_PSP_2	Garnello.201607_AJE_1_10to14.NA_PSP_2	peat metagenome	1799672
SAMN40302639	Garnello.201607_AJE_1_10to14.NA_PSP_3	Garnello.201607_AJE_1_10to14.NA_PSP_3	peat metagenome	1799672
SAMN40302640	Garnello.201607_AJE_1_30to34.NA_PSP_1	Garnello.201607_AJE_1_30to34.NA_PSP_1	peat metagenome	1799672
SAMN40302641	Garnello.201607_AJE_1_30to34.NA_PSP_2	Garnello.201607_AJE_1_30to34.NA_PSP_2	peat metagenome	1799672
SAMN40302642	Garnello.201607_AJE_1_30to34.NA_PSP_3	Garnello.201607_AJE_1_30to34.NA_PSP_3	peat metagenome	1799672
SAMN40302643	Garnello.201607_AJS_1_10to14.LG_RC_1	Garnello.201607_AJS_1_10to14.LG_RC_1	peat metagenome	1799672
SAMN40302644	Garnello.201607_AJS_1_10to14.LG_RC_2	Garnello.201607_AJS_1_10to14.LG_RC_2	peat metagenome	1799672
SAMN40302645	Garnello.201607_AJS_1_10to14.LG_RC_3	Garnello.201607_AJS_1_10to14.LG_RC_3	peat metagenome	1799672
SAMN40302646	Garnello.201607_AJS_1_30to34.LG_RC_1	Garnello.201607_AJS_1_30to34.LG_RC_1	peat metagenome	1799672
SAMN40302647	Garnello.201607_AJS_1_30to34.LG_RC_2	Garnello.201607_AJS_1_30to34.LG_RC_2	peat metagenome	1799672
SAMN40302648	Garnello.201607_AJS_1_30to34.LG_RC_3	Garnello.201607_AJS_1_30to34.LG_RC_3	peat metagenome	1799672
SAMN40302649	Garnello.201607_AJP_1_10to14.LG_RC_1	Garnello.201607_AJP_1_10to14.LG_RC_1	peat metagenome	1799672
SAMN40302650	Garnello.201607_AJP_1_10to14.LG_RC_2	Garnello.201607_AJP_1_10to14.LG_RC_2	peat metagenome	1799672
SAMN40302651	Garnello.201607_AJP_1_10to14.LG_RC_3	Garnello.201607_AJP_1_10to14.LG_RC_3	peat metagenome	1799672
SAMN40302652	Garnello.201607_AJP_1_30to34.LG_RC_2	Garnello.201607_AJP_1_30to34.LG_RC_2	peat metagenome	1799672
SAMN40302653	Garnello.201607_AJP_1_30to34.LG_RC_3	Garnello.201607_AJP_1_30to34.LG_RC_3	peat metagenome	1799672
SAMN40302654	Garnello.201607_AJE_1_10to14.LG_RC_1	Garnello.201607_AJE_1_10to14.LG_RC_1	peat metagenome	1799672
SAMN40302655	Garnello.201607_AJE_1_10to14.LG_RC_2	Garnello.201607_AJE_1_10to14.LG_RC_2	peat metagenome	1799672
SAMN40302656	Garnello.201607_AJE_1_10to14.LG_RC_3	Garnello.201607_AJE_1_10to14.LG_RC_3	peat metagenome	1799672
SAMN40302657	Garnello.201607_AJE_1_30to34.LG_RC_1	Garnello.201607_AJE_1_30to34.LG_RC_1	peat metagenome	1799672
SAMN40302658	Garnello.201607_AJE_1_30to34.LG_RC_2	Garnello.201607_AJE_1_30to34.LG_RC_2	peat metagenome	1799672
SAMN40302659	Garnello.201607_AJE_1_30to34.LG_RC_3	Garnello.201607_AJE_1_30to34.LG_RC_3	peat metagenome	1799672
SAMN40302660	Garnello.201607_AJP_1_10to14.LG_SR_1	Garnello.201607_AJP_1_10to14.LG_SR_1	peat metagenome	1799672
SAMN40302661	Garnello.201607_AJP_1_10to14.LG_SR_2	Garnello.201607_AJP_1_10to14.LG_SR_2	peat metagenome	1799672
SAMN40302662	Garnello.201607_AJP_1_10to14.LG_SR_3	Garnello.201607_AJP_1_10to14.LG_SR_3	peat metagenome	1799672
SAMN40302663	Garnello.201607_AJP_1_30to34.LG_SR_1	Garnello.201607_AJP_1_30to34.LG_SR_1	peat metagenome	1799672
SAMN40302664	Garnello.201607_AJP_1_30to34.LG_SR_2	Garnello.201607_AJP_1_30to34.LG_SR_2	peat metagenome	1799672
SAMN40302665	Garnello.201607_AJP_1_30to34.LG_SR_3	Garnello.201607_AJP_1_30to34.LG_SR_3	peat metagenome	1799672
SAMN40302666	Garnello.201607_AJS_1_10to14.LG_SR_1	Garnello.201607_AJS_1_10to14.LG_SR_1	peat metagenome	1799672
SAMN40302667	Garnello.201607_AJS_1_10to14.LG_SR_2	Garnello.201607_AJS_1_10to14.LG_SR_2	peat metagenome	1799672
SAMN40302668	Garnello.201607_AJS_1_10to14.LG_SR_3	Garnello.201607_AJS_1_10to14.LG_SR_3	peat metagenome	1799672
SAMN40302669	Garnello.201607_AJS_1_30to34.LG_SR_1	Garnello.201607_AJS_1_30to34.LG_SR_1	peat metagenome	1799672
SAMN40302670	Garnello.201607_AJS_1_30to34.LG_SR_2	Garnello.201607_AJS_1_30to34.LG_SR_2	peat metagenome	1799672
SAMN40302671	Garnello.201607_AJS_1_30to34.LG_SR_3	Garnello.201607_AJS_1_30to34.LG_SR_3	peat metagenome	1799672
SAMN40302672	Garnello.201607_AJE_1_10to14.LG_SR_1	Garnello.201607_AJE_1_10to14.LG_SR_1	peat metagenome	1799672
SAMN40302673	Garnello.201607_AJE_1_10to14.LG_SR_2	Garnello.201607_AJE_1_10to14.LG_SR_2	peat metagenome	1799672
SAMN40302674	Garnello.201607_AJE_1_10to14.LG_SR_3	Garnello.201607_AJE_1_10to14.LG_SR_3	peat metagenome	1799672
SAMN40302675	Garnello.201607_AJE_1_30to34.LG_SR_1	Garnello.201607_AJE_1_30to34.LG_SR_1	peat metagenome	1799672
SAMN40302676	Garnello.201607_AJE_1_30to34.LG_SR_2	Garnello.201607_AJE_1_30to34.LG_SR_2	peat metagenome	1799672
SAMN40302677	Garnello.201607_AJE_1_30to34.LG_SR_3	Garnello.201607_AJE_1_30to34.LG_SR_3	peat metagenome	1799672
SAMN40302678	Garnello.201607_AJP_1_10to14.NA_S_1	Garnello.201607_AJP_1_10to14.NA_S_1	peat metagenome	1799672
SAMN40302679	Garnello.201607_AJP_1_10to14.NA_S_2	Garnello.201607_AJP_1_10to14.NA_S_2	peat metagenome	1799672
SAMN40302680	Garnello.201607_AJP_1_10to14.NA_S_3	Garnello.201607_AJP_1_10to14.NA_S_3	peat metagenome	1799672
SAMN40302681	Garnello.201607_AJP_1_30to34.NA_S_1	Garnello.201607_AJP_1_30to34.NA_S_1	peat metagenome	1799672
SAMN40302682	Garnello.201607_AJP_1_30to34.NA_S_2	Garnello.201607_AJP_1_30to34.NA_S_2	peat metagenome	1799672
SAMN40302683	Garnello.201607_AJP_1_30to34.NA_S_3	Garnello.201607_AJP_1_30to34.NA_S_3	peat metagenome	1799672
SAMN40302684	Garnello.201607_AJS_1_10to14.NA_S_1	Garnello.201607_AJS_1_10to14.NA_S_1	peat metagenome	1799672
SAMN40302685	Garnello.201607_AJS_1_10to14.NA_S_2	Garnello.201607_AJS_1_10to14.NA_S_2	peat metagenome	1799672
SAMN40302686	Garnello.201607_AJS_1_10to14.NA_S_3	Garnello.201607_AJS_1_10to14.NA_S_3	peat metagenome	1799672
SAMN40302687	Garnello.201607_AJS_1_30to34.NA_S_1	Garnello.201607_AJS_1_30to34.NA_S_1	peat metagenome	1799672
SAMN40302688	Garnello.201607_AJS_1_30to34.NA_S_2	Garnello.201607_AJS_1_30to34.NA_S_2	peat metagenome	1799672
SAMN40302689	Garnello.201607_AJS_1_30to34.NA_S_3	Garnello.201607_AJS_1_30to34.NA_S_3	peat metagenome	1799672
SAMN40302690	Garnello.201607_AJE_1_10to14.NA_S_1	Garnello.201607_AJE_1_10to14.NA_S_1	peat metagenome	1799672
SAMN40302691	Garnello.201607_AJE_1_10to14.NA_S_2	Garnello.201607_AJE_1_10to14.NA_S_2	peat metagenome	1799672
SAMN40302692	Garnello.201607_AJE_1_10to14.NA_S_3	Garnello.201607_AJE_1_10to14.NA_S_3	peat metagenome	1799672
SAMN40302693	Garnello.201607_AJE_1_30to34.NA_S_1	Garnello.201607_AJE_1_30to34.NA_S_1	peat metagenome	1799672
SAMN40302694	Garnello.201607_AJE_1_30to34.NA_S_2	Garnello.201607_AJE_1_30to34.NA_S_2	peat metagenome	1799672
SAMN40302695	Garnello.201607_AJE_1_30to34.NA_S_3	Garnello.201607_AJE_1_30to34.NA_S_3	peat metagenome	1799672
SAMN40302696	Garnello.201607_AJP_1_10to14.LN_S_1	Garnello.201607_AJP_1_10to14.LN_S_1	peat metagenome	1799672
SAMN40302697	Garnello.201607_AJP_1_10to14.LN_S_2	Garnello.201607_AJP_1_10to14.LN_S_2	peat metagenome	1799672
SAMN40302698	Garnello.201607_AJP_1_10to14.LN_S_3	Garnello.201607_AJP_1_10to14.LN_S_3	peat metagenome	1799672
SAMN40302699	Garnello.201607_AJP_1_30to34.LN_S_1	Garnello.201607_AJP_1_30to34.LN_S_1	peat metagenome	1799672
SAMN40302700	Garnello.201607_AJP_1_30to34.LN_S_2	Garnello.201607_AJP_1_30to34.LN_S_2	peat metagenome	1799672
SAMN40302701	Garnello.201607_AJP_1_30to34.LN_S_3	Garnello.201607_AJP_1_30to34.LN_S_3	peat metagenome	1799672
SAMN40302702	Garnello.201607_AJS_1_10to14.LN_S_1	Garnello.201607_AJS_1_10to14.LN_S_1	peat metagenome	1799672
SAMN40302703	Garnello.201607_AJS_1_10to14.LN_S_2	Garnello.201607_AJS_1_10to14.LN_S_2	peat metagenome	1799672
SAMN40302704	Garnello.201607_AJS_1_10to14.LN_S_3	Garnello.201607_AJS_1_10to14.LN_S_3	peat metagenome	1799672
SAMN40302705	Garnello.201607_AJS_1_30to34.LN_S_1	Garnello.201607_AJS_1_30to34.LN_S_1	peat metagenome	1799672
SAMN40302706	Garnello.201607_AJS_1_30to34.LN_S_2	Garnello.201607_AJS_1_30to34.LN_S_2	peat metagenome	1799672
SAMN40302707	Garnello.201607_AJS_1_30to34.LN_S_3	Garnello.201607_AJS_1_30to34.LN_S_3	peat metagenome	1799672
SAMN40302708	Garnello.201607_AJE_1_10to14.LN_S_1	Garnello.201607_AJE_1_10to14.LN_S_1	peat metagenome	1799672
SAMN40302709	Garnello.201607_AJE_1_10to14.LN_S_2	Garnello.201607_AJE_1_10to14.LN_S_2	peat metagenome	1799672
SAMN40302710	Garnello.201607_AJE_1_10to14.LN_S_3	Garnello.201607_AJE_1_10to14.LN_S_3	peat metagenome	1799672
SAMN40302711	Garnello.201607_AJE_1_30to34.LN_S_1	Garnello.201607_AJE_1_30to34.LN_S_1	peat metagenome	1799672
SAMN40302712	Garnello.201607_AJE_1_30to34.LN_S_2	Garnello.201607_AJE_1_30to34.LN_S_2	peat metagenome	1799672
SAMN40302713	Garnello.201607_AJE_1_30to34.LN_S_3	Garnello.201607_AJE_1_30to34.LN_S_3	peat metagenome	1799672
SAMN40302714	Garnello.201607_AJP_1_10to14.LG_PSH_1	Garnello.201607_AJP_1_10to14.LG_PSH_1	peat metagenome	1799672
SAMN40302715	Garnello.201607_AJP_1_10to14.LG_PSH_2	Garnello.201607_AJP_1_10to14.LG_PSH_2	peat metagenome	1799672
SAMN40302716	Garnello.201607_AJP_1_10to14.LG_PSH_3	Garnello.201607_AJP_1_10to14.LG_PSH_3	peat metagenome	1799672
SAMN40302717	Garnello.201607_AJP_1_30to34.LG_PSH_1	Garnello.201607_AJP_1_30to34.LG_PSH_1	peat metagenome	1799672
SAMN40302718	Garnello.201607_AJP_1_30to34.LG_PSH_2	Garnello.201607_AJP_1_30to34.LG_PSH_2	peat metagenome	1799672
SAMN40302719	Garnello.201607_AJP_1_30to34.LG_PSH_3	Garnello.201607_AJP_1_30to34.LG_PSH_3	peat metagenome	1799672
SAMN40302720	Garnello.201607_AJS_1_10to14.LG_PSH_1	Garnello.201607_AJS_1_10to14.LG_PSH_1	peat metagenome	1799672
SAMN40302721	Garnello.201607_AJS_1_10to14.LG_PSH_2	Garnello.201607_AJS_1_10to14.LG_PSH_2	peat metagenome	1799672
SAMN40302722	Garnello.201607_AJS_1_10to14.LG_PSH_3	Garnello.201607_AJS_1_10to14.LG_PSH_3	peat metagenome	1799672
SAMN40302723	Garnello.201607_AJS_1_30to34.LG_PSH_1	Garnello.201607_AJS_1_30to34.LG_PSH_1	peat metagenome	1799672
SAMN40302724	Garnello.201607_AJS_1_30to34.LG_PSH_2	Garnello.201607_AJS_1_30to34.LG_PSH_2	peat metagenome	1799672
SAMN40302725	Garnello.201607_AJS_1_30to34.LG_PSH_3	Garnello.201607_AJS_1_30to34.LG_PSH_3	peat metagenome	1799672
SAMN40302726	Garnello.201607_AJE_1_10to14.LG_PSH_1	Garnello.201607_AJE_1_10to14.LG_PSH_1	peat metagenome	1799672
SAMN40302727	Garnello.201607_AJE_1_10to14.LG_PSH_2	Garnello.201607_AJE_1_10to14.LG_PSH_2	peat metagenome	1799672
SAMN40302728	Garnello.201607_AJE_1_10to14.LG_PSH_3	Garnello.201607_AJE_1_10to14.LG_PSH_3	peat metagenome	1799672
SAMN40302729	Garnello.201607_AJE_1_30to34.LG_PSH_1	Garnello.201607_AJE_1_30to34.LG_PSH_1	peat metagenome	1799672
SAMN40302730	Garnello.201607_AJE_1_30to34.LG_PSH_2	Garnello.201607_AJE_1_30to34.LG_PSH_2	peat metagenome	1799672
SAMN40302731	Garnello.201607_AJE_1_30to34.LG_PSH_3	Garnello.201607_AJE_1_30to34.LG_PSH_3	peat metagenome	1799672
SAMN40302732	Garnello.201607_AJP_1_10to14.LG_S_1	Garnello.201607_AJP_1_10to14.LG_S_1	peat metagenome	1799672
SAMN40302733	Garnello.201607_AJP_1_10to14.LG_S_2	Garnello.201607_AJP_1_10to14.LG_S_2	peat metagenome	1799672
SAMN40302734	Garnello.201607_AJP_1_10to14.LG_S_3	Garnello.201607_AJP_1_10to14.LG_S_3	peat metagenome	1799672
SAMN40302735	Garnello.201607_AJP_1_30to34.LG_S_1	Garnello.201607_AJP_1_30to34.LG_S_1	peat metagenome	1799672
SAMN40302736	Garnello.201607_AJP_1_30to34.LG_S_2	Garnello.201607_AJP_1_30to34.LG_S_2	peat metagenome	1799672
SAMN40302737	Garnello.201607_AJP_1_30to34.LG_S_3	Garnello.201607_AJP_1_30to34.LG_S_3	peat metagenome	1799672
SAMN40302738	Garnello.201607_AJS_1_10to14.LG_S_1	Garnello.201607_AJS_1_10to14.LG_S_1	peat metagenome	1799672
SAMN40302739	Garnello.201607_AJS_1_10to14.LG_S_2	Garnello.201607_AJS_1_10to14.LG_S_2	peat metagenome	1799672
SAMN40302740	Garnello.201607_AJS_1_10to14.LG_S_3	Garnello.201607_AJS_1_10to14.LG_S_3	peat metagenome	1799672
SAMN40302741	Garnello.201607_AJS_1_30to34.LG_S_1	Garnello.201607_AJS_1_30to34.LG_S_1	peat metagenome	1799672
SAMN40302742	Garnello.201607_AJS_1_30to34.LG_S_2	Garnello.201607_AJS_1_30to34.LG_S_2	peat metagenome	1799672
SAMN40302743	Garnello.201607_AJS_1_30to34.LG_S_3	Garnello.201607_AJS_1_30to34.LG_S_3	peat metagenome	1799672
SAMN40302744	Garnello.201607_AJE_1_10to14.LG_S_1	Garnello.201607_AJE_1_10to14.LG_S_1	peat metagenome	1799672
SAMN40302745	Garnello.201607_AJE_1_10to14.LG_S_2	Garnello.201607_AJE_1_10to14.LG_S_2	peat metagenome	1799672
SAMN40302746	Garnello.201607_AJE_1_10to14.LG_S_3	Garnello.201607_AJE_1_10to14.LG_S_3	peat metagenome	1799672
SAMN40302747	Garnello.201607_AJE_1_30to34.LG_S_1	Garnello.201607_AJE_1_30to34.LG_S_1	peat metagenome	1799672
SAMN40302748	Garnello.201607_AJE_1_30to34.LG_S_2	Garnello.201607_AJE_1_30to34.LG_S_2	peat metagenome	1799672
SAMN40302749	Garnello.201607_AJE_1_30to34.LG_S_3	Garnello.201607_AJE_1_30to34.LG_S_3	peat metagenome	1799672
SAMN40302750	Garnello.201907_AJS_1_10to14.LG_SR_1	Garnello.201907_AJS_1_10to14.LG_SR_1	peat metagenome	1799672
SAMN40302751	Garnello.201907_AJS_1_10to14.LG_SR_2	Garnello.201907_AJS_1_10to14.LG_SR_2	peat metagenome	1799672
SAMN40302752	Garnello.201907_AJS_1_10to14.LG_SR_3	Garnello.201907_AJS_1_10to14.LG_SR_3	peat metagenome	1799672
SAMN40302753	Garnello.201907_AJS_1_30to34.LG_SR_1	Garnello.201907_AJS_1_30to34.LG_SR_1	peat metagenome	1799672
SAMN40302754	Garnello.201907_AJS_1_30to34.LG_SR_2	Garnello.201907_AJS_1_30to34.LG_SR_2	peat metagenome	1799672
SAMN40302755	Garnello.201907_AJS_1_30to34.LG_SR_3	Garnello.201907_AJS_1_30to34.LG_SR_3	peat metagenome	1799672
SAMN40302756	Garnello.201907_AJS_1_10to14.NA_SR_1	Garnello.201907_AJS_1_10to14.NA_SR_1	peat metagenome	1799672
SAMN40302757	Garnello.201907_AJS_1_10to14.NA_SR_2	Garnello.201907_AJS_1_10to14.NA_SR_2	peat metagenome	1799672
SAMN40302758	Garnello.201907_AJS_1_10to14.NA_SR_3	Garnello.201907_AJS_1_10to14.NA_SR_3	peat metagenome	1799672
SAMN40302759	Garnello.201907_AJS_1_30to34.NA_SR_1	Garnello.201907_AJS_1_30to34.NA_SR_1	peat metagenome	1799672
SAMN40302760	Garnello.201907_AJS_1_30to34.NA_SR_2	Garnello.201907_AJS_1_30to34.NA_SR_2	peat metagenome	1799672
SAMN40302761	Garnello.201907_AJS_1_30to34.NA_SR_3	Garnello.201907_AJS_1_30to34.NA_SR_3	peat metagenome	1799672
SAMN40302762	Garnello.201907_AJS_1_10to14.LN_SR_1	Garnello.201907_AJS_1_10to14.LN_SR_1	peat metagenome	1799672
SAMN40302763	Garnello.201907_AJS_1_10to14.LN_SR_2	Garnello.201907_AJS_1_10to14.LN_SR_2	peat metagenome	1799672
SAMN40302764	Garnello.201907_AJS_1_10to14.LN_SR_3	Garnello.201907_AJS_1_10to14.LN_SR_3	peat metagenome	1799672
SAMN40302765	Garnello.201907_AJS_1_30to34.LN_SR_1	Garnello.201907_AJS_1_30to34.LN_SR_1	peat metagenome	1799672
SAMN40302766	Garnello.201907_AJS_1_30to34.LN_SR_2	Garnello.201907_AJS_1_30to34.LN_SR_2	peat metagenome	1799672
SAMN40302767	Garnello.201907_AJS_1_30to34.LN_SR_3	Garnello.201907_AJS_1_30to34.LN_SR_3	peat metagenome	1799672
