# Supplementary material for: Impact of storage and extraction methods on peat soil microbiomes
Source: PeerJ journal article supplement (doi:10.7717/peerj.18745), 2024-12-23
Supplement: TableS3.xlsx [file TableS3.xlsx]

## Sheet: Table S3
Table S3: Average read quality for LG-stored samples
Avg Read Quality	MethodID	Storage	Extraction	Location	Depth	Replicate	SampleName
35.8673	MC S-10-14 LG-RC-1	LG	RC	S	10-14	1	SB4417
35.744	MC S-10-14 LG-RC-2	LG	RC	S	10-14	2	SB4418
35.7893	MC S-10-14 LG-RC-3	LG	RC	S	10-14	3	SB4419
35.7631	MC S-30-34 LG-RC-1	LG	RC	S	30-34	1	SB4420
35.9131	MC S-30-34 LG-RC-2	LG	RC	S	30-34	2	SB4421
35.8587	MC S-30-34 LG-RC-3	LG	RC	S	30-34	3	SB4422
34.3028	MC P-10-14 LG-RC-1	LG	RC	P	10-14	1	SB4423
35.8722	MC P-10-14 LG-RC-2	LG	RC	P	10-14	2	SB4424
35.7839	MC P-10-14 LG-RC-3	LG	RC	P	10-14	3	SB4425
35.9099	MC P-30-34 LG-RC-2	LG	RC	P	30-34	2	SB4427
35.8208	MC P-30-34 LG-RC-3	LG	RC	P	30-34	3	SB4428
35.6285	MC E-10-14 LG-RC-1	LG	RC	E	10-14	1	SB4429
35.8337	MC E-10-14 LG-RC-2	LG	RC	E	10-14	2	SB4430
35.7898	MC E-10-14 LG-RC-3	LG	RC	E	10-14	3	SB4431
35.3181	MC E-30-34 LG-RC-1	LG	RC	E	30-34	1	SB4432
35.7627	MC E-30-34 LG-RC-2	LG	RC	E	30-34	2	SB4433
35.7929	MC E-30-34 LG-RC-3	LG	RC	E	30-34	3	SB4434
36.6518	MC P-10-14 LG-SR-1	LG	SR	P	10-14	1	SB6347
36.6412	MC P-10-14 LG-SR-2	LG	SR	P	10-14	2	SB6348
36.6497	MC P-10-14 LG-SR-3	LG	SR	P	10-14	3	SB6349
36.662	MC P-30-34 LG-SR-1	LG	SR	P	30-34	1	SB6350
36.6318	MC P-30-34 LG-SR-2	LG	SR	P	30-34	2	SB6351
36.617	MC P-30-34 LG-SR-3	LG	SR	P	30-34	3	SB6352
36.6749	MC S-10-14 LG-SR-1	LG	SR	S	10-14	1	SB6353
36.6885	MC S-10-14 LG-SR-2	LG	SR	S	10-14	2	SB6354
36.6458	MC S-10-14 LG-SR-3	LG	SR	S	10-14	3	SB6355
36.6142	MC S-30-34 LG-SR-1	LG	SR	S	30-34	1	SB6356
37.213	MC S-30-34 LG-SR-2	LG	SR	S	30-34	2	SB6357
36.6909	MC S-30-34 LG-SR-3	LG	SR	S	30-34	3	SB6358
36.6262	MC E-10-14 LG-SR-1	LG	SR	E	10-14	1	SB6359
36.5324	MC E-10-14 LG-SR-2	LG	SR	E	10-14	2	SB6360
36.5245	MC E-10-14 LG-SR-3	LG	SR	E	10-14	3	SB6361
36.5872	MC E-30-34 LG-SR-1	LG	SR	E	30-34	1	SB6362
36.6438	MC E-30-34 LG-SR-2	LG	SR	E	30-34	2	SB6363
36.6085	MC E-30-34 LG-SR-3	LG	SR	E	30-34	3	SB6364
36.6758	MC P-10-14 LG-PSH-1	LG	PSH	P	10-14	1	SB6401
36.6935	MC P-10-14 LG-PSH-2	LG	PSH	P	10-14	2	SB6402
36.5976	MC P-10-14 LG-PSH-3	LG	PSH	P	10-14	3	SB6403
36.6735	MC P-30-34 LG-PSH-1	LG	PSH	P	30-34	1	SB6404
36.6696	MC P-30-34 LG-PSH-2	LG	PSH	P	30-34	2	SB6405
36.6801	MC P-30-34 LG-PSH-3	LG	PSH	P	30-34	3	SB6406
36.5738	MC S-10-14 LG-PSH-1	LG	PSH	S	10-14	1	SB6407
36.5902	MC S-10-14 LG-PSH-2	LG	PSH	S	10-14	2	SB6408
36.533	MC S-10-14 LG-PSH-3	LG	PSH	S	10-14	3	SB6409
36.5521	MC S-30-34 LG-PSH-1	LG	PSH	S	30-34	1	SB6410
36.4979	MC S-30-34 LG-PSH-2	LG	PSH	S	30-34	2	SB6411
36.5311	MC S-30-34 LG-PSH-3	LG	PSH	S	30-34	3	SB6412
36.512	MC E-10-14 LG-PSH-1	LG	PSH	E	10-14	1	SB6413
36.5737	MC E-10-14 LG-PSH-2	LG	PSH	E	10-14	2	SB6414
36.5053	MC E-10-14 LG-PSH-3	LG	PSH	E	10-14	3	SB6415
36.5687	MC E-30-34 LG-PSH-1	LG	PSH	E	30-34	1	SB6416
36.5405	MC E-30-34 LG-PSH-2	LG	PSH	E	30-34	2	SB6417
36.6383	MC E-30-34 LG-PSH-3	LG	PSH	E	30-34	3	SB6418
36.6593	MC P-10-14 LG-S-1	LG	S	P	10-14	1	SB6419
36.4757	MC P-10-14 LG-S-2	LG	S	P	10-14	2	SB6420
36.5476	MC P-10-14 LG-S-3	LG	S	P	10-14	3	SB6421
36.6296	MC P-10-14 LG-SL-1	LG	SL	P	10-14	1	SB6422
36.6197	MC P-10-14 LG-SL-2	LG	SL	P	10-14	2	SB6423
36.5853	MC P-10-14 LG-SL-3	LG	SL	P	10-14	3	SB6424
36.6549	MC P-30-34 LG-S-1	LG	S	P	30-34	1	SB6425
36.6449	MC P-30-34 LG-S-2	LG	S	P	30-34	2	SB6426
36.6541	MC P-30-34 LG-S-3	LG	S	P	30-34	3	SB6427
36.654	MC P-30-34 LG-SL-1	LG	SL	P	30-34	1	SB6428
36.6458	MC P-30-34 LG-SL-2	LG	SL	P	30-34	2	SB6429
36.6891	MC P-30-34 LG-SL-3	LG	SL	P	30-34	3	SB6430
36.5641	MC S-10-14 LG-S-1	LG	S	S	10-14	1	SB6431
35.8762	MC S-10-14 LG-S-2	LG	S	S	10-14	2	SB6432
36.5148	MC S-10-14 LG-S-3	LG	S	S	10-14	3	SB6433
36.3587	MC S-10-14 LG-SL-1	LG	SL	S	10-14	1	SB6434
36.504	MC S-10-14 LG-SL-2	LG	SL	S	10-14	2	SB6435
36.5401	MC S-10-14 LG-SL-3	LG	SL	S	10-14	3	SB6436
36.5913	MC S-30-34 LG-S-1	LG	S	S	30-34	1	SB6437
36.5543	MC S-30-34 LG-S-2	LG	S	S	30-34	2	SB6438
36.572	MC S-30-34 LG-S-3	LG	S	S	30-34	3	SB6439
36.5304	MC S-30-34 LG-SL-1	LG	SL	S	30-34	1	SB6440
36.5684	MC S-30-34 LG-SL-2	LG	SL	S	30-34	2	SB6441
36.5966	MC S-30-34 LG-SL-3	LG	SL	S	30-34	3	SB6442
36.5729	MC E-10-14 LG-S-1	LG	S	E	10-14	1	SB6443
36.5637	MC E-10-14 LG-S-2	LG	S	E	10-14	2	SB6444
36.5544	MC E-10-14 LG-S-3	LG	S	E	10-14	3	SB6445
36.5858	MC E-10-14 LG-SL-1	LG	SL	E	10-14	1	SB6446
36.5474	MC E-10-14 LG-SL-2	LG	SL	E	10-14	2	SB6447
36.5727	MC E-10-14 LG-SL-3	LG	SL	E	10-14	3	SB6448
36.5221	MC E-30-34 LG-S-1	LG	S	E	30-34	1	SB6449
36.6049	MC E-30-34 LG-S-2	LG	S	E	30-34	2	SB6450
36.5892	MC E-30-34 LG-S-3	LG	S	E	30-34	3	SB6451
36.5866	MC E-30-34 LG-SL-1	LG	SL	E	30-34	1	SB6452
36.594	MC E-30-34 LG-SL-2	LG	SL	E	30-34	2	SB6453
36.6526	MC E-30-34 LG-SL-3	LG	SL	E	30-34	3	SB6454
