# Supplementary material for: Impact of storage and extraction methods on peat soil microbiomes
Source: PeerJ journal article supplement (doi:10.7717/peerj.18745), 2024-12-23
Supplement: TableS5.xlsx [file TableS5.xlsx]

## Sheet: Table S5
Table S5: Taxonomy table per ASV
Feature ID	Taxonomy
5395f8f05406842a5b86ecca13fab2d5	d__Archaea; p__Euryarchaeota; c__Methanobacteria; o__Methanobacteriales; f__Methanobacteriaceae; g__Methanobacterium
4bfb407453dcca3983bd2940197c17d8	d__Archaea; p__Euryarchaeota; c__Methanobacteria; o__Methanobacteriales; f__Methanobacteriaceae; g__Methanobacterium
d27df436ebe5d31b7dc32d19855695f5	d__Archaea; p__Euryarchaeota; c__Methanobacteria; o__Methanobacteriales; f__Methanobacteriaceae; g__Methanobacterium
6b6a17d30dea623ea6811e9e6b4ad49f	d__Bacteria; p__Bacteroidota; c__Bacteroidia; o__Bacteroidales; f__Bacteroidetes_vadinHA17; g__Bacteroidetes_vadinHA17
daf2d08cc2f0a41180113f765f67087b	d__Archaea; p__Crenarchaeota; c__Bathyarchaeia; o__Bathyarchaeia; f__Bathyarchaeia; g__Bathyarchaeia
f6383f54e7a638e59f1f840c89d0a155	d__Bacteria; p__Bacteroidota; c__Bacteroidia; o__Bacteroidales; f__Bacteroidetes_vadinHA17; g__Bacteroidetes_vadinHA17
75672cdda98a3c5bd64f7c072629d5ee	d__Bacteria; p__Bacteroidota; c__Bacteroidia; o__Bacteroidales; f__Bacteroidetes_vadinHA17; g__Bacteroidetes_vadinHA17
4108b878e27be0adf8d8d0701b6720cd	d__Archaea; p__Crenarchaeota; c__Bathyarchaeia; o__Bathyarchaeia; f__Bathyarchaeia; g__Bathyarchaeia
c6781c18ce0619dc3d0843a4ddcaddd3	d__Archaea; p__Euryarchaeota; c__Methanobacteria; o__Methanobacteriales; f__Methanobacteriaceae; g__Methanobacterium
810d7454465c4ab095c89ee838641c4f	d__Bacteria; p__Bacteroidota; c__Bacteroidia; o__Bacteroidales; f__Bacteroidetes_vadinHA17; g__Bacteroidetes_vadinHA17
bae1c2e454f77dad946403c42e9cac7b	d__Bacteria; p__Bacteroidota; c__Bacteroidia; o__Bacteroidales; f__Prolixibacteraceae; g__BSV13; s__uncultured_Bacteroidetes
8308058cb8262c79355dd16ff8fbabd3	d__Bacteria; p__Bacteroidota; c__Bacteroidia; o__Bacteroidales; f__Bacteroidetes_vadinHA17; g__Bacteroidetes_vadinHA17
8d582843e7da1089a8f56b127b7d3173	d__Archaea; p__Halobacterota; c__Methanomicrobia; o__Methanomicrobiales; f__Methanoregulaceae; g__Methanoregula
ee7bd77abe9b1c161a13cbefbf3c2819	d__Archaea; p__Halobacterota; c__Methanomicrobia; o__Methanomicrobiales; f__Methanoregulaceae; g__Methanoregula; s__uncultured_archaeon
4732d9654163091b13cd66667bcaee3e	d__Bacteria; p__Bacteroidota; c__Bacteroidia; o__Bacteroidales; f__Bacteroidetes_vadinHA17; g__Bacteroidetes_vadinHA17
e2dede1fbee21bf39a2e3a231e24bb5c	d__Bacteria; p__Actinobacteriota; c__Coriobacteriia; o__OPB41; f__OPB41; g__OPB41
024de290138042ce9fe90d028dc674fa	d__Bacteria; p__Bacteroidota; c__Bacteroidia; o__Bacteroidales; f__Bacteroidetes_vadinHA17; g__Bacteroidetes_vadinHA17
ea97ea17193f2716f8444dd16b450456	d__Bacteria; p__Caldisericota; c__Caldisericia; o__Caldisericales; f__Caldisericaceae; g__Caldisericum; s__uncultured_eubacterium
45b8c4520220466f70c2cf2ff889a106	d__Bacteria; p__Caldisericota; c__Caldisericia; o__Caldisericales; f__Caldisericaceae; g__Caldisericum; s__uncultured_eubacterium
13ba290e7eb0b4def2e89a55533c358f	d__Bacteria; p__Bacteroidota; c__Bacteroidia; o__Bacteroidales; f__Prolixibacteraceae; g__BSV13; s__uncultured_Bacteroidetes
a75ad67c3abf0fd665a1011f8d2f3992	d__Bacteria; p__Bacteroidota; c__Bacteroidia; o__Bacteroidales
f4015e76c62d5141aaa842a60131913e	d__Bacteria; p__Chloroflexi; c__KD4-96; o__KD4-96; f__KD4-96; g__KD4-96; s__uncultured_Anaerolineaceae
7b845ded8e82751485d2f0873f237b8d	d__Bacteria; p__Acidobacteriota; c__Acidobacteriae; o__Acidobacteriales; f__Acidobacteriaceae_(Subgroup_1); g__Occallatibacter; s__uncultured_forest
181ba64446b71305766121da8abe154b	d__Bacteria; p__Proteobacteria; c__Gammaproteobacteria; o__Burkholderiales; f__Gallionellaceae
6d0861e6b4b707ca910d800447f8e51f	d__Bacteria; p__Proteobacteria; c__Alphaproteobacteria; o__Rhizobiales; f__Xanthobacteraceae; g__Pseudolabrys
05c30b8fa77f63ec954e787a20700f0a	d__Bacteria; p__Chloroflexi; c__KD4-96; o__KD4-96; f__KD4-96; g__KD4-96; s__uncultured_bacterium
04f4ff64b1bbb64021218614f5d20149	d__Bacteria; p__Bacteroidota; c__Bacteroidia; o__Sphingobacteriales; f__Lentimicrobiaceae; g__Lentimicrobiaceae; s__uncultured_bacterium
cc6c955011e8233951f47bac3e75de3a	d__Archaea; p__Halobacterota; c__Methanosarcinia; o__Methanosarciniales; f__Methanosarcinaceae; g__Methanosarcina
a23b21363986aecc18cd1a0893e5c86a	d__Bacteria; p__Bacteroidota; c__Bacteroidia; o__Bacteroidales; f__Bacteroidetes_vadinHA17; g__Bacteroidetes_vadinHA17
4479d06d7299f2cdc4d6f88655a08b2c	d__Archaea; p__Halobacterota; c__Methanosarcinia; o__Methanosarciniales; f__Methanosaetaceae; g__Methanosaeta
60706c6099d5c9560d40152b24062c58	d__Archaea; p__Euryarchaeota; c__Methanobacteria; o__Methanobacteriales; f__Methanobacteriaceae; g__Methanobacterium
89dac3331027abf4146e586968c12e07	d__Bacteria; p__Bacteroidota; c__Bacteroidia; o__Sphingobacteriales; f__Lentimicrobiaceae; g__Lentimicrobiaceae; s__uncultured_bacterium
4d53a2ca34e5705bd4cd0b55dfbd5581	d__Archaea; p__Crenarchaeota; c__Bathyarchaeia; o__Bathyarchaeia; f__Bathyarchaeia; g__Bathyarchaeia
993e3408dc105ff018172a87f9d23b29	d__Bacteria; p__Proteobacteria; c__Alphaproteobacteria; o__Rhizobiales; f__Beijerinckiaceae; g__Roseiarcus; s__uncultured_bacterium
d138fbb7bc300127687130c4dd48b5c3	d__Archaea; p__Halobacterota; c__Methanosarcinia; o__Methanosarciniales; f__Methanosarcinaceae; g__Methanosarcina
adb56aa3d0a8bf95f9bbb9639ecdcb6a	d__Bacteria; p__Caldisericota; c__Caldisericia; o__Caldisericales; f__Caldisericaceae; g__Caldisericum; s__uncultured_eubacterium
530ac84c035034be640b2e09fef4bc42	d__Archaea; p__Halobacterota; c__Methanosarcinia; o__Methanosarciniales; f__Methanosaetaceae; g__Methanosaeta
5eb86002fe317a58a160a95c0fb4e5cd	d__Bacteria; p__Actinobacteriota; c__Coriobacteriia; o__OPB41; f__OPB41; g__OPB41
7043e5ed075b87b0ea050d055d7c2db3	d__Bacteria; p__Proteobacteria; c__Alphaproteobacteria; o__Rhizobiales; f__Xanthobacteraceae; g__Pseudolabrys
95de3945368f71f71e91d92a0e794778	d__Archaea; p__Euryarchaeota; c__Methanobacteria; o__Methanobacteriales; f__Methanobacteriaceae; g__Methanobacterium
621d4a3402308c2cb6a420b1a0fe5f35	d__Bacteria; p__Bacteroidota; c__Bacteroidia; o__Bacteroidales; f__Paludibacteraceae; g__uncultured; s__marine_metagenome
6799b0b837d59c61d982f21745073a00	d__Bacteria; p__Bacteroidota; c__Bacteroidia; o__Bacteroidales
c1da5cafa6acada10d3c040beb029ceb	d__Bacteria; p__Bacteroidota; c__Bacteroidia; o__Bacteroidales; f__Paludibacteraceae; g__uncultured; s__marine_metagenome
42402167b5fd02ba79d845756871b73e	d__Bacteria; p__Actinobacteriota; c__Acidimicrobiia; o__uncultured; f__uncultured; g__uncultured
4d28bf49a41568e4c6ac5347690573dc	d__Bacteria; p__Proteobacteria; c__Alphaproteobacteria; o__Rhizobiales; f__Xanthobacteraceae; g__Pseudolabrys
2bec3051d7cedb3c72a32e1d8b603d32	d__Bacteria; p__Bacteroidota; c__Bacteroidia; o__Bacteroidales; f__Prolixibacteraceae; g__BSV13; s__uncultured_Bacteroidetes
27066dc6e23c78c88eb8806b50f0c7f0	d__Archaea; p__Halobacterota; c__Methanosarcinia; o__Methanosarciniales; f__Methanosaetaceae; g__Methanosaeta
a8d6b57322151cfe1c79036f2ce4dffb	d__Bacteria; p__Caldisericota; c__Caldisericia; o__Caldisericales; f__Caldisericaceae; g__Caldisericum; s__uncultured_eubacterium
bf481738f285fd2a2a745e854dba8564	d__Archaea; p__Thermoplasmatota; c__Thermoplasmata; o__Methanomassiliicoccales; f__Methanomassiliicoccaceae; g__uncultured; s__metagenome
38c3d0c89f8bacdc56ae493ddecb6d64	d__Bacteria; p__Actinobacteriota; c__Coriobacteriia; o__OPB41; f__OPB41; g__OPB41
f8e34fc86662b3d3aae923947a911876	d__Archaea; p__Thermoplasmatota; c__Thermoplasmata; o__Methanomassiliicoccales; f__Methanomassiliicoccaceae; g__uncultured; s__metagenome
872287f561edb6f5ab70374f68b8c547	d__Bacteria; p__Caldisericota; c__Caldisericia; o__Caldisericales; f__Caldisericaceae; g__Caldisericum; s__uncultured_eubacterium
2a7b18fe91701f6d4ef9f225e97ac78c	d__Bacteria; p__Acidobacteriota; c__Acidobacteriae; o__Subgroup_2; f__Subgroup_2; g__Subgroup_2
392aaab9cb1c38fd1a6df4a7500d6d29	d__Archaea; p__Halobacterota; c__Methanosarcinia; o__Methanosarciniales; f__Methanosarcinaceae; g__Methanosarcina
19a87acb52125a9d76734c32620e3df5	d__Bacteria; p__Proteobacteria; c__Alphaproteobacteria; o__Rhizobiales; f__Beijerinckiaceae; g__Roseiarcus; s__uncultured_bacterium
58144ed58c1143efd647b7230b9da549	d__Bacteria; p__Caldisericota; c__Caldisericia; o__Caldisericales; f__Caldisericaceae; g__Caldisericum; s__uncultured_eubacterium
fff91154c2b2834cd6a173679f4960a7	d__Bacteria; p__Bacteroidota; c__Bacteroidia; o__Sphingobacteriales; f__Lentimicrobiaceae; g__Lentimicrobiaceae; s__uncultured_bacterium
99a66276635763c7baa2a6de43dfff7b	d__Bacteria; p__Proteobacteria; c__Gammaproteobacteria; o__Burkholderiales; f__Gallionellaceae; g__Gallionella
6d62ebbcc73753b1d1a00ae20af7c9b8	d__Bacteria; p__Acidobacteriota; c__Holophagae; o__Holophagales; f__Holophagaceae
d411da2e38b748dfd894b678a5d9aa1a	d__Bacteria; p__Verrucomicrobiota; c__Verrucomicrobiae; o__Opitutales; f__Opitutaceae; g__Lacunisphaera; s__metagenome
1e4b717e0b6f6926a3de91f4a5d5a038	d__Bacteria; p__Chloroflexi; c__KD4-96; o__KD4-96; f__KD4-96; g__KD4-96
034f9cb62b40d6c6754978aaae6d01be	d__Bacteria; p__Proteobacteria; c__Alphaproteobacteria; o__Rhizobiales; f__Xanthobacteraceae; g__Pseudolabrys
5ddcc7c0845e5fb7c10f2297d550c68b	d__Archaea; p__Halobacterota; c__Methanomicrobia; o__Methanomicrobiales; f__Methanoregulaceae; g__Methanoregula; s__uncultured_archaeon
0ab74d6ff47df99dba8f742b7546967c	d__Bacteria; p__Patescibacteria; c__Microgenomatia; o__Candidatus_Levybacteria; f__Candidatus_Levybacteria; g__Candidatus_Levybacteria; s__uncultured_bacterium
b9252dfd07e5e04d3651d449f73fb510	d__Bacteria; p__Patescibacteria; c__Microgenomatia; o__Candidatus_Levybacteria; f__Candidatus_Levybacteria; g__Candidatus_Levybacteria; s__uncultured_bacterium
f5807630672a38320941a4eed7fae082	d__Bacteria; p__Chloroflexi; c__KD4-96; o__KD4-96; f__KD4-96; g__KD4-96; s__uncultured_Chloroflexi
88fd041e66f891b235575407a50d1b17	d__Bacteria; p__Acidobacteriota; c__Acidobacteriae; o__Subgroup_2; f__Subgroup_2; g__Subgroup_2
fb0412b1804bd7f44ea73e3d9c9be567	d__Bacteria; p__Caldisericota; c__Caldisericia; o__Caldisericales; f__Caldisericaceae; g__Caldisericum
74649b3f784114d5f0edb667279291e9	d__Bacteria; p__Chloroflexi; c__KD4-96; o__KD4-96; f__KD4-96; g__KD4-96; s__uncultured_bacterium
68e9de7ce4aafd41673bf26427133a81	d__Bacteria; p__Patescibacteria; c__Parcubacteria; o__Parcubacteria; f__Parcubacteria; g__Parcubacteria; s__uncultured_bacterium
9e74bfd32eaa09947654919155df237d	d__Bacteria; p__Acidobacteriota; c__Holophagae; o__Holophagales; f__Holophagaceae
f121888d24dd1f10653998854ba8cef3	d__Bacteria; p__Bacteroidota; c__Bacteroidia; o__Bacteroidales; f__Prolixibacteraceae; g__BSV13; s__uncultured_Bacteroidetes
2bad1566e5330632678ccc910f926dda	d__Bacteria; p__Chloroflexi; c__Anaerolineae; o__Anaerolineales; f__Anaerolineaceae; g__uncultured; s__uncultured_prokaryote
d47747384914723d6c2548cb858a3fb6	d__Bacteria; p__Bacteroidota; c__Bacteroidia; o__Bacteroidales
1dd14125f9b4f5915f61d0e337780609	d__Archaea; p__Euryarchaeota; c__Methanobacteria; o__Methanobacteriales; f__Methanobacteriaceae; g__Methanobacterium
a61c382ddcab059189b9a2cc8b6ae37e	d__Bacteria; p__Bacteroidota; c__Bacteroidia; o__Bacteroidales; f__Paludibacteraceae; g__uncultured; s__marine_metagenome
07d72c7eaa4ef15bdcd80fab201fb06c	d__Bacteria; p__Proteobacteria; c__Gammaproteobacteria; o__Burkholderiales; f__Gallionellaceae; g__Gallionella
1083091002e6a0ef9b9e617fc662da9f	d__Bacteria; p__Planctomycetota; c__Planctomycetes; o__Pirellulales; f__Pirellulaceae; g__uncultured
5486062c9c4f6872121432191f22a43f	d__Bacteria; p__Proteobacteria; c__Alphaproteobacteria; o__Rhizobiales; f__Beijerinckiaceae; g__Roseiarcus; s__uncultured_bacterium
9caefd3bb9d19b7db6fc7489f1c55303	d__Bacteria; p__Chloroflexi; c__KD4-96; o__KD4-96; f__KD4-96; g__KD4-96; s__uncultured_bacterium
7a1629cf6ead7b24ae6827fec56e1a0d	d__Bacteria; p__Bacteroidota; c__Bacteroidia; o__Bacteroidales; f__Paludibacteraceae; g__uncultured; s__marine_metagenome
26b8741e6cdda5bb11d1af0f5f831ea4	d__Bacteria; p__Acidobacteriota; c__Acidobacteriae; o__Acidobacteriales; f__Acidobacteriaceae_(Subgroup_1); g__Occallatibacter; s__uncultured_forest
e36b8b33e6239dac806ffc6012805662	d__Bacteria; p__Acidobacteriota; c__Holophagae; o__Holophagales; f__Holophagaceae
27c39ee2d6365384b897dad7ea87edad	d__Eukaryota; p__Phragmoplastophyta; c__Embryophyta; o__Magnoliophyta; f__Magnoliophyta; g__Magnoliophyta
4c2d94d85f9aa567cd574e6178552dd4	d__Bacteria; p__Acidobacteriota; c__Acidobacteriae; o__Acidobacteriales; f__Acidobacteriaceae_(Subgroup_1); g__Occallatibacter; s__uncultured_forest
7a688b23303bba01f2b0bfa6f0a850b3	d__Bacteria; p__Acidobacteriota; c__Acidobacteriae; o__Subgroup_2; f__Subgroup_2; g__Subgroup_2; s__uncultured_forest
71364eeb0d229f58f65a89d9921867b5	d__Bacteria; p__Chloroflexi; c__Anaerolineae; o__Anaerolineales; f__Anaerolineaceae; g__uncultured; s__uncultured_prokaryote
86538eaf18379c9b3dd05c1602268ad3	d__Bacteria; p__Chloroflexi; c__KD4-96; o__KD4-96; f__KD4-96; g__KD4-96; s__uncultured_Anaerolineaceae
40af0aaa0e3fa29cbd7a6fb882345723	d__Bacteria; p__Actinobacteriota; c__Actinobacteria; o__Micrococcales; f__Demequinaceae; g__Demequina
856edd975d39d745046e8d2284c152a8	d__Bacteria; p__Acidobacteriota; c__Holophagae; o__Holophagales; f__Holophagaceae; g__uncultured; s__uncultured_bacterium
8059c87654f894aa772ba97a8f385fb7	d__Bacteria; p__Acidobacteriota; c__Blastocatellia; o__Pyrinomonadales; f__Pyrinomonadaceae; g__RB41
6f60614f588c65214997dacee397ebfb	d__Bacteria; p__Acidobacteriota; c__Acidobacteriae; o__Subgroup_2; f__Subgroup_2; g__Subgroup_2
49be742a116d44bc7286104f306f7121	d__Bacteria; p__Acidobacteriota; c__Acidobacteriae; o__Acidobacteriales; f__Acidobacteriaceae_(Subgroup_1)
72e9b4a2d0a1d6e43dbea97eeadedb80	d__Archaea; p__Halobacterota; c__Methanosarcinia; o__Methanosarciniales; f__Methanosarcinaceae; g__Methanosarcina
efe8fb1b0809ef7d93238466c634aa8f	d__Bacteria; p__Acidobacteriota; c__Acidobacteriae; o__Acidobacteriales; f__Acidobacteriaceae_(Subgroup_1)
397c945df08b45754d30861c8e72f99c	d__Eukaryota; p__Phragmoplastophyta; c__Embryophyta; o__Magnoliophyta; f__Magnoliophyta; g__Magnoliophyta
3376e0459fb1a6947e2315dad17b0833	d__Bacteria; p__Actinobacteriota; c__Acidimicrobiia; o__IMCC26256; f__IMCC26256; g__IMCC26256
cead4fcf76ab8389c18f621f6c6c6d4c	d__Bacteria; p__Actinobacteriota; c__Acidimicrobiia; o__uncultured; f__uncultured; g__uncultured; s__uncultured_forest
cac4a8b0804e31c3c6b943df1cd97939	d__Bacteria; p__Acidobacteriota; c__Acidobacteriae; o__Acidobacteriales; f__Acidobacteriaceae_(Subgroup_1)
96dc6519a1f2c3a5e5161588510cda8c	d__Bacteria; p__Actinobacteriota; c__Coriobacteriia; o__OPB41; f__OPB41; g__OPB41
62b61dfa66d1afd53e84bdfce6f868fa	d__Bacteria; p__Chloroflexi; c__KD4-96; o__KD4-96; f__KD4-96; g__KD4-96; s__uncultured_Anaerolineaceae
9a010f07ef9aff580ec2c0e60486929b	d__Bacteria; p__Planctomycetota; c__Planctomycetes; o__Pirellulales; f__Pirellulaceae
da661fe1d524486d7356e19187f18ad4	d__Bacteria; p__Chloroflexi; c__KD4-96; o__KD4-96; f__KD4-96; g__KD4-96
86ec53aa53e8db63f6a59d028657e07d	d__Bacteria; p__Chloroflexi; c__Anaerolineae; o__Anaerolineales; f__Anaerolineaceae; g__uncultured; s__uncultured_prokaryote
1985f51dd145546b55ff47cfdddd41af	d__Bacteria; p__Proteobacteria; c__Gammaproteobacteria; o__Burkholderiales; f__Gallionellaceae
2e981b6ce38fc9ab20033d7019eea8ad	d__Bacteria; p__Actinobacteriota; c__Actinobacteria; o__Micrococcales; f__Intrasporangiaceae; g__Oryzihumus; s__uncultured_bacterium
e29d22dea48c15ad7cb845a38c495dff	d__Bacteria; p__Proteobacteria; c__Alphaproteobacteria; o__Rhizobiales; f__Beijerinckiaceae; g__Roseiarcus; s__uncultured_bacterium
0ee77b2e774a3529ade9af744c6b8e78	d__Bacteria; p__Acidobacteriota; c__Acidobacteriae; o__Acidobacteriales; f__Koribacteraceae; g__Candidatus_Koribacter; s__uncultured_Acidobacteria
6bf989f6f4d50d859fbb0e125415ec51	d__Bacteria; p__Bacteroidota; c__Bacteroidia; o__Bacteroidales; f__Prolixibacteraceae; g__BSV13; s__uncultured_Bacteroidetes
7828c4ccfcd420611d9bc84d475e688d	d__Bacteria; p__Actinobacteriota; c__Actinobacteria; o__Micrococcales; f__Intrasporangiaceae; g__Oryzihumus; s__uncultured_bacterium
22ff4bd7b051493735cd528bb38a3ddc	d__Archaea; p__Halobacterota; c__Methanosarcinia; o__Methanosarciniales; f__Methanosaetaceae; g__Methanosaeta
276270952a370ce2173a1a22c7969e73	d__Bacteria; p__Actinobacteriota; c__Acidimicrobiia; o__IMCC26256; f__IMCC26256; g__IMCC26256
873de7e9d66adf8294a01fc3624fd6be	d__Archaea; p__Halobacterota; c__Methanosarcinia; o__Methanosarciniales; f__Methanosarcinaceae; g__Methanosarcina
883031f9f78f367aa88e6bb3bcc7229c	d__Bacteria; p__Acidobacteriota; c__Holophagae; o__Holophagales; f__Holophagaceae
aa1c6f0ff36e9bd0505a7f7fc0448568	d__Bacteria; p__Chloroflexi; c__KD4-96; o__KD4-96; f__KD4-96; g__KD4-96; s__uncultured_bacterium
cd7141f902a149f1172e1cb8f0744e8f	d__Bacteria; p__Chloroflexi; c__KD4-96; o__KD4-96; f__KD4-96; g__KD4-96
4b66fd674cdbe344136676d9641d55b3	d__Archaea; p__Halobacterota; c__Methanosarcinia; o__Methanosarciniales; f__Methanosarcinaceae; g__Methanosarcina
2a587df891bdac34756b23b74efa37e4	d__Archaea; p__Halobacterota; c__Methanomicrobia; o__Methanomicrobiales; f__Methanoregulaceae; g__Methanoregula; s__uncultured_archaeon
d3f489da0b888eeb3d5be0c08ac47bb6	d__Bacteria; p__Chloroflexi; c__AD3; o__AD3; f__AD3; g__AD3; s__uncultured_Chloroflexi
748be1eb8b921d97647859e0199ffab4	d__Bacteria; p__Acidobacteriota; c__Acidobacteriae; o__Acidobacteriales; f__Acidobacteriaceae_(Subgroup_1)
383a5abd35014887a00ebc94c9d6e9a4	d__Bacteria; p__Chloroflexi; c__KD4-96; o__KD4-96; f__KD4-96; g__KD4-96; s__uncultured_Chloroflexi
8ae59b3c7f8596e869cbcd74fb4cd366	d__Bacteria; p__Firmicutes; c__Clostridia; o__Oscillospirales
953480971fc467f34296566e9526b9be	d__Bacteria; p__Acidobacteriota; c__Blastocatellia; o__Pyrinomonadales; f__Pyrinomonadaceae; g__RB41
9509c914a9532e7b1e1fafd49d57721d	d__Bacteria; p__Actinobacteriota; c__Actinobacteria; o__Micrococcales; f__Demequinaceae; g__Demequina
44ccbebd7105ae6aeff379df47e5d6d9	d__Bacteria; p__Patescibacteria; c__Microgenomatia; o__Candidatus_Levybacteria; f__Candidatus_Levybacteria; g__Candidatus_Levybacteria; s__uncultured_bacterium
5868fad64dd001b79613f0d9544448ea	d__Bacteria; p__Chloroflexi; c__KD4-96; o__KD4-96; f__KD4-96; g__KD4-96; s__uncultured_Chloroflexi
7def4c56d3f20539298c7ec30ae1216e	d__Archaea; p__Euryarchaeota; c__Methanobacteria; o__Methanobacteriales; f__Methanobacteriaceae; g__Methanobacterium
03db1a95e4820b9be54d5276f4264c0c	d__Bacteria; p__Firmicutes; c__Negativicutes; o__Veillonellales-Selenomonadales; f__Selenomonadaceae; g__Zymophilus; s__Propionispira_paucivorans
6f92ff7eba46e868a0f4adfaae87930a	d__Bacteria; p__Verrucomicrobiota; c__Verrucomicrobiae; o__Opitutales; f__Opitutaceae
08ac60eec0c13a2e0bbe22d8496b96de	d__Bacteria; p__Bacteroidota; c__Bacteroidia; o__Bacteroidales; f__Paludibacteraceae; g__uncultured
701c87be54458f4eaaba3e27fe465f2a	d__Bacteria; p__Patescibacteria; c__Parcubacteria; o__Parcubacteria; f__Parcubacteria; g__Parcubacteria; s__uncultured_bacterium
ce43d46de9dade9626b3729457d4ee03	d__Bacteria; p__Bacteroidota; c__Bacteroidia; o__Sphingobacteriales; f__Lentimicrobiaceae; g__Lentimicrobiaceae; s__uncultured_bacterium
1848863f7c82804ccbed5ffd0a3a6fb4	d__Bacteria; p__Chloroflexi; c__KD4-96; o__KD4-96; f__KD4-96; g__KD4-96
5c5b7524dab48b33b987bff95accc1b8	d__Eukaryota; p__Phragmoplastophyta; c__Embryophyta; o__Magnoliophyta; f__Magnoliophyta; g__Magnoliophyta
02d52c63535ca755851666f1edfb3ba3	d__Archaea; p__Halobacterota; c__Methanosarcinia; o__Methanosarciniales; f__Methanosarcinaceae; g__Methanosarcina
67acfb8a70c226e3c5fec407d0c3a301	d__Bacteria; p__Caldisericota; c__Caldisericia; o__Caldisericales; f__Caldisericaceae; g__Caldisericum; s__uncultured_eubacterium
88e3a177c33d16b3849ff19400242392	d__Bacteria; p__Verrucomicrobiota; c__Verrucomicrobiae; o__Opitutales; f__Opitutaceae
54c9fef548cff952c49a44f871169da4	d__Bacteria; p__Bacteroidota; c__Bacteroidia; o__Bacteroidales; f__Bacteroidaceae; g__Bacteroides
0e174d7b870422a59f6b9e530bba9dda	d__Bacteria; p__Bacteroidota; c__Bacteroidia; o__Bacteroidales; f__Paludibacteraceae; g__uncultured; s__marine_metagenome
029777842e919dc62814eab863595d63	d__Bacteria; p__Patescibacteria; c__Parcubacteria; o__Parcubacteria; f__Parcubacteria; g__Parcubacteria; s__uncultured_bacterium
9f21de9d97f214f2ebe3a736385beb47	d__Bacteria; p__Verrucomicrobiota; c__Verrucomicrobiae; o__Pedosphaerales; f__Pedosphaeraceae; g__Ellin516; s__uncultured_bacterium
77ee01290fbfc04b78f926089174916b	d__Bacteria; p__Gemmatimonadota; c__Gemmatimonadetes; o__Gemmatimonadales; f__Gemmatimonadaceae; g__uncultured
dfebe1f5321e9f1048ddb2f53e4da017	d__Bacteria; p__Actinobacteriota; c__Actinobacteria; o__Frankiales; f__Acidothermaceae; g__Acidothermus
4dc44e0c7a991dbc68f1328a78fdc138	d__Bacteria; p__Verrucomicrobiota; c__Verrucomicrobiae; o__Pedosphaerales; f__Pedosphaeraceae; g__Ellin516
f0c0dd296517474a26fd50e262a88517	d__Bacteria; p__Patescibacteria; c__Microgenomatia; o__Candidatus_Levybacteria; f__Candidatus_Levybacteria; g__Candidatus_Levybacteria; s__uncultured_bacterium
369d41501c1f00649dab57d6bfa816fe	d__Bacteria; p__Actinobacteriota; c__Thermoleophilia; o__Solirubrobacterales; f__Solirubrobacteraceae; g__Conexibacter
21c274cb87656a0f70613cde23553ba3	d__Bacteria; p__Patescibacteria; c__Microgenomatia; o__Candidatus_Levybacteria; f__Candidatus_Levybacteria; g__Candidatus_Levybacteria; s__uncultured_bacterium
b312ee002c734bc44bdde89968abd43a	d__Eukaryota; p__Phragmoplastophyta; c__Embryophyta; o__Magnoliophyta; f__Magnoliophyta; g__Magnoliophyta
26bf15f085a558e55ceec89a66c030de	d__Bacteria; p__Verrucomicrobiota; c__Verrucomicrobiae; o__Opitutales; f__Opitutaceae
262b97c12497180a45113425d432db53	d__Bacteria; p__Bacteroidota; c__Bacteroidia; o__Bacteroidales; f__Bacteroidaceae; g__Bacteroides
ac25d6528599a478316d1e8aee241edb	d__Bacteria; p__Verrucomicrobiota; c__Verrucomicrobiae; o__Opitutales; f__Opitutaceae; g__Lacunisphaera; s__metagenome
9e21b8c49fa7860db0e3e3f8e6b89704	d__Bacteria; p__Verrucomicrobiota; c__Verrucomicrobiae; o__Opitutales; f__Opitutaceae; g__uncultured; s__uncultured_bacterium
2f50a5c05f62e028a58277f7f901dbff	d__Eukaryota; p__Phragmoplastophyta; c__Embryophyta; o__Magnoliophyta; f__Magnoliophyta; g__Magnoliophyta
6d883c3bc289242949eac4b07770c872	d__Bacteria; p__Actinobacteriota; c__Acidimicrobiia; o__uncultured; f__uncultured; g__uncultured; s__uncultured_forest
6ae88695b651b2e6397ff0d822e91e05	d__Bacteria; p__Bacteroidota; c__Bacteroidia; o__Bacteroidales; f__Paludibacteraceae; g__uncultured
80811dc46380ac7ceada0bf9093540fb	d__Bacteria; p__Bacteroidota; c__Bacteroidia; o__Bacteroidales
a886985cec061bc9adb0d2c9c8dae5c6	d__Eukaryota; p__Phragmoplastophyta; c__Embryophyta; o__Magnoliophyta; f__Magnoliophyta; g__Magnoliophyta
f6213202d980393ce16277cf627d4fc9	d__Bacteria; p__Chloroflexi; c__AD3; o__AD3; f__AD3; g__AD3; s__uncultured_Chloroflexi
dc7f739920805e473bccfab91247f5e2	d__Bacteria; p__Firmicutes; c__Clostridia; o__Oscillospirales; f__Ruminococcaceae
6e68a8be9faa94c0fd6767e7adf68adf	d__Bacteria; p__Caldisericota; c__Caldisericia; o__Caldisericales; f__Caldisericaceae; g__Caldisericum; s__uncultured_eubacterium
bfc2702a86ccdf39f475daae2e4d1662	d__Bacteria; p__Firmicutes; c__Negativicutes; o__Veillonellales-Selenomonadales; f__Selenomonadaceae; g__Zymophilus; s__Propionispira_paucivorans
c177caf0380d53415a9e57ac3c318105	d__Archaea; p__Crenarchaeota; c__Nitrososphaeria; o__Group_1.1c; f__Group_1.1c; g__Group_1.1c; s__uncultured_crenarchaeote
13f3f65635f1757d3d1f2e375ed54cc8	d__Bacteria; p__Firmicutes; c__Clostridia; o__Oscillospirales
ff214849dd416eb2011eb285856abb0e	d__Bacteria; p__Chloroflexi; c__Anaerolineae; o__Anaerolineales; f__Anaerolineaceae; g__uncultured; s__uncultured_prokaryote
857d1620c8c9652c6af9114ecdc2affb	d__Bacteria; p__Chloroflexi; c__AD3; o__AD3; f__AD3; g__AD3; s__uncultured_Chloroflexi
a84b9dfde07ea05926c4f534a927d4dc	d__Bacteria; p__Actinobacteriota; c__Actinobacteria; o__Frankiales; f__Acidothermaceae; g__Acidothermus
f8011cd9988a27a916546e860dda404f	d__Eukaryota; p__Phragmoplastophyta; c__Embryophyta; o__Magnoliophyta; f__Magnoliophyta; g__Magnoliophyta
913d822ed63786a550d02310742efdfb	d__Bacteria; p__Chloroflexi; c__KD4-96; o__KD4-96; f__KD4-96; g__KD4-96
614f97e9b23ca85cdf1b869c4917d50e	d__Bacteria; p__Proteobacteria; c__Gammaproteobacteria
58e3502da4b9de7b41359169269e3f90	d__Bacteria; p__Verrucomicrobiota; c__Verrucomicrobiae; o__Pedosphaerales; f__Pedosphaeraceae; g__Ellin516
dcee0ead03b5ff96878a2d40557d6b4f	d__Bacteria; p__Verrucomicrobiota; c__Verrucomicrobiae; o__Pedosphaerales; f__Pedosphaeraceae; g__ADurb.Bin063-1
9411c46bd78808fcd8f6e90522d94454	d__Archaea; p__Euryarchaeota; c__Methanobacteria; o__Methanobacteriales; f__Methanobacteriaceae; g__Methanobacterium
06d7392163f4df1a04f7502da04f48d4	d__Bacteria; p__Acidobacteriota; c__Acidobacteriae; o__Solibacterales; f__Solibacteraceae; g__Candidatus_Solibacter; s__uncultured_Acidobacteria
cd36a4e67451c950a5d74ebb2802eb20	d__Bacteria; p__Chloroflexi; c__KD4-96; o__KD4-96; f__KD4-96; g__KD4-96; s__uncultured_Anaerolineaceae
7696c65cfa7a11b56a5128e29e2768e5	d__Eukaryota; p__Ciliophora; c__Intramacronucleata; o__Spirotrichea; f__Hypotrichia
a89610baa531d71c7a43cbefe1a722a7	d__Bacteria; p__Desulfobacterota; c__Syntrophia; o__Syntrophales; f__Syntrophaceae; g__Syntrophus
54c0152f5cfd89aeb8b500e0944fae12	d__Bacteria; p__Bacteroidota; c__Ignavibacteria; o__Ignavibacteriales
5cc56d5003c81c58156159e18455d774	d__Bacteria; p__Verrucomicrobiota; c__Verrucomicrobiae; o__Opitutales; f__Opitutaceae
ac565e3791d40bf8ecea2f0d874877de	d__Bacteria; p__Acidobacteriota; c__Acidobacteriae; o__Solibacterales; f__Solibacteraceae; g__Candidatus_Solibacter
ac446dd24c3006e57b51dbe270d218e8	d__Archaea; p__Thermoplasmatota; c__Thermoplasmata; o__Methanomassiliicoccales; f__Methanomassiliicoccaceae; g__uncultured; s__metagenome
8fbe003fc7cfd1cc0e22c90f3fb0a416	d__Bacteria; p__Patescibacteria; c__Parcubacteria; o__Parcubacteria; f__Parcubacteria; g__Parcubacteria; s__uncultured_bacterium
ca3929dcf46ad210b805b649f034bd95	d__Bacteria; p__Chloroflexi; c__AD3; o__AD3; f__AD3; g__AD3; s__uncultured_bacterium
a52c2deefb380abc535a7a4a2bf4c59b	d__Bacteria; p__Bacteroidota; c__Bacteroidia; o__Bacteroidales; f__Paludibacteraceae; g__uncultured; s__marine_metagenome
ceb4480782d72e6990f22229671ec653	d__Bacteria; p__Actinobacteriota; c__Actinobacteria; o__Propionibacteriales; f__Propionibacteriaceae; g__Aestuariimicrobium; s__uncultured_bacterium
be8598233bc2631b52e794dfc558cdc3	d__Bacteria; p__Proteobacteria; c__Alphaproteobacteria; o__Rhizobiales; f__Beijerinckiaceae; g__Rhodoblastus; s__Rhodoblastus_sphagnicola
0aa6a94af6a480dd76759734d5dfba99	d__Bacteria; p__Bacteroidota; c__Bacteroidia; o__Bacteroidales; f__Bacteroidetes_vadinHA17; g__Bacteroidetes_vadinHA17; s__uncultured_Bacteroidales
32d2fc5a6b6a9e13e89c04770e49018f	d__Bacteria; p__Actinobacteriota; c__Actinobacteria; o__Frankiales; f__Acidothermaceae; g__Acidothermus
b8df1f2b6283b4d61675f781b283fc15	d__Bacteria; p__Chloroflexi; c__AD3; o__AD3; f__AD3; g__AD3; s__uncultured_bacterium
51b2f87c775748ec58dd3be221ae042d	d__Bacteria; p__Bacteroidota; c__Bacteroidia; o__Sphingobacteriales; f__Lentimicrobiaceae; g__Lentimicrobiaceae; s__uncultured_bacterium
5d8a72ac0917483c96aee13140441321	d__Bacteria; p__Proteobacteria; c__Gammaproteobacteria
054ed4a05d771a535857613ca46aac1d	d__Eukaryota; p__Ascomycota; c__Leotiomycetes; o__Helotiales
d7fec16c834593d8ec97284d052ba3c4	d__Bacteria; p__Acidobacteriota; c__Acidobacteriae; o__Solibacterales; f__Solibacteraceae; g__Candidatus_Solibacter
156b251ea2e05cbb01157bccdc72402b	d__Bacteria; p__Chloroflexi; c__KD4-96; o__KD4-96; f__KD4-96; g__KD4-96; s__uncultured_Chloroflexi
fc2d23324e70aef386de3673a467228e	d__Bacteria; p__Acidobacteriota; c__Acidobacteriae; o__Acidobacteriales; f__Acidobacteriaceae_(Subgroup_1)
81c63978f82ad8a5fff03fc32ce5f58d	d__Bacteria; p__Chloroflexi; c__AD3; o__AD3; f__AD3; g__AD3; s__uncultured_bacterium
865550e43368d552633b249f5c703a56	d__Bacteria; p__Proteobacteria; c__Gammaproteobacteria; o__Burkholderiales; f__Rhodocyclaceae
72ed11302d414c946bf3b828add981b9	d__Bacteria; p__Verrucomicrobiota; c__Verrucomicrobiae; o__Opitutales; f__Opitutaceae; g__uncultured; s__uncultured_bacterium
b3d55be89868375f0774a8cd17dfbc16	d__Bacteria; p__Verrucomicrobiota; c__Verrucomicrobiae; o__Pedosphaerales; f__Pedosphaeraceae; g__ADurb.Bin063-1
0b3acc447258eb7156e9026b6faa5b8a	d__Bacteria; p__Bacteroidota; c__Bacteroidia; o__Bacteroidales; f__Prolixibacteraceae; g__BSV13
95136064eece77827a08a57101ad462c	d__Bacteria; p__Fibrobacterota; c__Fibrobacteria; o__Fibrobacterales; f__Fibrobacteraceae; g__uncultured; s__metagenome
19067a73dd8b10f40b5fd31c99e33442	d__Bacteria; p__Proteobacteria; c__Alphaproteobacteria; o__Rhizobiales; f__Beijerinckiaceae; g__Rhodoblastus; s__Rhodoblastus_sphagnicola
910190866e1ca718ffcddaffd4e3397f	d__Bacteria; p__Acidobacteriota; c__Acidobacteriae; o__Acidobacteriales; f__Acidobacteriaceae_(Subgroup_1); g__Occallatibacter
7dde8cd487be5fa601cba67a51ed3ac7	d__Bacteria; p__Actinobacteriota; c__Acidimicrobiia; o__IMCC26256; f__IMCC26256; g__IMCC26256
0e1c64339f9d2e56fe2e53f1b554f2dc	d__Bacteria; p__Acidobacteriota; c__Blastocatellia; o__Pyrinomonadales; f__Pyrinomonadaceae; g__RB41; s__uncultured_Acidobacteria
b762a106037f47becb0d09fa1036bbee	d__Bacteria; p__Chloroflexi; c__Anaerolineae; o__Anaerolineales; f__Anaerolineaceae; g__uncultured; s__uncultured_prokaryote
4b20e6fc55ecfd8e65bbdadb177f1940	d__Bacteria; p__Acidobacteriota; c__Acidobacteriae; o__Solibacterales; f__Solibacteraceae; g__Candidatus_Solibacter
5ac3b65d0a3aa8c8777c00fd26eb6ae0	d__Bacteria; p__Acidobacteriota; c__Acidobacteriae; o__Solibacterales; f__Solibacteraceae; g__Candidatus_Solibacter
65d6248cef50a8c513252a27a53df437	d__Bacteria; p__Acidobacteriota; c__Acidobacteriae; o__Acidobacteriales; f__Koribacteraceae; g__Candidatus_Koribacter
68e35cabfa923dde46ba790c9ae6f3cd	d__Bacteria; p__Proteobacteria; c__Alphaproteobacteria; o__Rhizobiales; f__Beijerinckiaceae; g__Roseiarcus; s__uncultured_bacterium
e3cff0ed77a02b5964362579c806386f	d__Archaea; p__Halobacterota; c__Methanomicrobia; o__Methanomicrobiales; f__Methanoregulaceae; g__Methanoregula
94f4ad57384b088ff0c2065d7b6a0090	d__Bacteria; p__Bacteroidota; c__Bacteroidia; o__Bacteroidales; f__Bacteroidetes_vadinHA17; g__Bacteroidetes_vadinHA17; s__uncultured_Bacteroidales
98bdf07f5fae4645b921e5e180720af1	d__Archaea; p__Halobacterota; c__Methanomicrobia; o__Methanomicrobiales; f__Methanoregulaceae; g__Methanoregula; s__uncultured_archaeon
b2791ea09e8693a7eadf872dc67e7e3e	d__Bacteria; p__Verrucomicrobiota; c__Verrucomicrobiae; o__Pedosphaerales; f__Pedosphaeraceae; g__ADurb.Bin063-1
6eca4e71f747a9bea756444496621c5d	d__Bacteria; p__Acidobacteriota; c__Blastocatellia; o__Pyrinomonadales; f__Pyrinomonadaceae; g__RB41; s__uncultured_Acidobacteria
013f307d5a2f05bbc4ea128cfa85c190	d__Bacteria; p__Actinobacteriota; c__Actinobacteria; o__Frankiales; f__Acidothermaceae; g__Acidothermus
5f5d2fd404244a25ab6680d3d21cacc1	d__Bacteria; p__Verrucomicrobiota; c__Verrucomicrobiae; o__Pedosphaerales; f__Pedosphaeraceae; g__Ellin516
6322c6f70569b911a640014134b792d1	d__Bacteria; p__Acidobacteriota; c__Acidobacteriae; o__Acidobacteriales; f__Koribacteraceae; g__Candidatus_Koribacter; s__uncultured_Acidobacteria
cc5e2c02f105c194e4ddfb74442d4ac6	d__Bacteria; p__Chloroflexi; c__KD4-96; o__KD4-96; f__KD4-96; g__KD4-96
f5d04d3ba971ffa869a26397e88c661e	d__Bacteria; p__Proteobacteria; c__Gammaproteobacteria
bc5fcb64bc4dd0e01f557b13b442bdaf	d__Bacteria; p__Bacteroidota; c__Bacteroidia; o__Bacteroidales; f__Bacteroidetes_vadinHA17; g__Bacteroidetes_vadinHA17; s__uncultured_Bacteroidales
7f9fdc1516c97738c28cd0c5f37b2923	d__Bacteria; p__Patescibacteria; c__Microgenomatia; o__Candidatus_Roizmanbacteria; f__Candidatus_Roizmanbacteria; g__Candidatus_Roizmanbacteria; s__uncultured_bacterium
147a5bdbbc68c2c47f467b9509390453	d__Bacteria; p__Firmicutes; c__Clostridia; o__Oscillospirales; f__Ruminococcaceae
9b576a38e485eed44486f41f7e49dfde	d__Bacteria; p__Proteobacteria; c__Gammaproteobacteria; o__WD260; f__WD260; g__WD260; s__uncultured_bacterium
8d8efacaad9494b13328c375b22a6792	d__Bacteria; p__Actinobacteriota; c__Thermoleophilia; o__Solirubrobacterales; f__Solirubrobacteraceae
8b5c862c6ecb2c802dec2e1a51315c00	d__Bacteria; p__Proteobacteria; c__Gammaproteobacteria; o__Burkholderiales; f__Nitrosomonadaceae; g__GOUTA6
2e5451cb3106fbd0495b8831d2702f81	d__Bacteria; p__Acidobacteriota; c__Acidobacteriae; o__Acidobacteriales; f__Acidobacteriaceae_(Subgroup_1)
b2a4724159fe690890e5cfe74d826944	d__Bacteria; p__Chloroflexi; c__KD4-96; o__KD4-96; f__KD4-96; g__KD4-96; s__uncultured_Chloroflexi
ccd29772f88039e1766374953fe21ae4	d__Eukaryota; p__Ascomycota; c__Leotiomycetes; o__Helotiales
a958e04e96217cda2b35e9b8e4680a08	d__Bacteria; p__Actinobacteriota; c__Thermoleophilia; o__Solirubrobacterales; f__Solirubrobacteraceae
3c1610cec5fed45eacc678184b40a8cf	d__Bacteria; p__Desulfobacterota; c__Syntrophia; o__Syntrophales; f__Syntrophaceae; g__Syntrophus
a56645ef04f6e72ac5d54c2508923d4e	d__Bacteria; p__Bacteroidota; c__Ignavibacteria; o__Ignavibacteriales
c5e59b94fd5c7faee2ff3af4815f225b	d__Eukaryota; p__Ciliophora; c__Intramacronucleata; o__Spirotrichea; f__Hypotrichia
b94910e01581143be0d056fa80a49262	d__Bacteria; p__Bacteroidota; c__Bacteroidia; o__Bacteroidales; f__Paludibacteraceae; g__uncultured; s__marine_metagenome
32404df079bb5c1c3e39bd2802433b32	d__Bacteria; p__Verrucomicrobiota; c__Verrucomicrobiae; o__Opitutales; f__Opitutaceae; g__Lacunisphaera; s__metagenome
38d63d98fe3b10dbd45ce48166fcca94	d__Bacteria; p__Acidobacteriota; c__Acidobacteriae; o__Acidobacteriales; f__Acidobacteriaceae_(Subgroup_1)
851d111bcca4a8b40e85eac028ed8faf	d__Bacteria; p__Bacteroidota; c__Bacteroidia; o__Bacteroidales; f__Prolixibacteraceae; g__BSV13; s__uncultured_bacterium
a07092eeed64072c18a7fe964c457b08	d__Bacteria; p__Chloroflexi; c__KD4-96; o__KD4-96; f__KD4-96; g__KD4-96
0fb833c5ac1ad8c20b296681942ce01f	d__Bacteria; p__Verrucomicrobiota; c__Verrucomicrobiae; o__Pedosphaerales; f__Pedosphaeraceae; g__uncultured
a7002bcfd654fff5d48fa783ba3f9207	d__Bacteria; p__Caldisericota; c__Caldisericia; o__Caldisericales; f__Caldisericaceae; g__Caldisericum
fbdec37d25bf6cd24b34b2c17b76b800	d__Bacteria; p__Actinobacteriota; c__Actinobacteria; o__Propionibacteriales; f__Propionibacteriaceae; g__Aestuariimicrobium; s__uncultured_bacterium
7a5ae85ed94789de12b089d8c53e0a22	d__Bacteria; p__Actinobacteriota; c__Thermoleophilia; o__Solirubrobacterales; f__Solirubrobacteraceae; g__Conexibacter
cb0b93633c2fc4d01686ebfe49333576	d__Bacteria; p__Acidobacteriota; c__Acidobacteriae; o__Acidobacteriales; f__Acidobacteriaceae_(Subgroup_1)
f0e4ef0c6764d1af82a912a1116a3ed2	d__Bacteria; p__Acidobacteriota; c__Acidobacteriae; o__Acidobacteriales; f__Acidobacteriaceae_(Subgroup_1)
b27d5996e33818021c572d84e8ba716b	d__Bacteria; p__Actinobacteriota; c__Thermoleophilia; o__Solirubrobacterales; f__Solirubrobacteraceae; g__Conexibacter
4bc3b68e57644a8e6c032eff8a70dd71	d__Bacteria; p__Patescibacteria; c__Microgenomatia; o__Candidatus_Woesebacteria; f__Candidatus_Woesebacteria; g__Candidatus_Woesebacteria; s__uncultured_Microgenomates
af4a82a788c4a43c2af089722512d6cf	d__Bacteria; p__Acidobacteriota; c__Acidobacteriae; o__Solibacterales; f__Solibacteraceae; g__Candidatus_Solibacter
ed1dbd7aa90ff380f621028ab171daba	d__Bacteria; p__Actinobacteriota; c__Actinobacteria; o__Micrococcales; f__Intrasporangiaceae; g__Oryzihumus; s__uncultured_bacterium
0a508dfc0e928505699f1ddcf6522321	d__Bacteria; p__Bacteroidota; c__Bacteroidia; o__Bacteroidales; f__Prolixibacteraceae; g__BSV13; s__uncultured_Bacteroidetes
430ae9dfe0fb174738dc569dd89bb5d4	d__Bacteria; p__Chloroflexi; c__KD4-96; o__KD4-96; f__KD4-96; g__KD4-96; s__uncultured_Anaerolineaceae
933aab4080e36eba595281f9eaa2d716	d__Bacteria; p__Planctomycetota; c__Planctomycetes; o__Pirellulales; f__Pirellulaceae; g__uncultured
7eade35980dde72bd4bb4ae3cae292e5	d__Bacteria; p__Patescibacteria; c__Microgenomatia; o__Candidatus_Roizmanbacteria; f__Candidatus_Roizmanbacteria; g__Candidatus_Roizmanbacteria; s__uncultured_bacterium
c02b0f3f101336d72cdaf1a5d56a0549	d__Bacteria; p__Bacteroidota; c__Bacteroidia; o__Bacteroidales; f__Bacteroidetes_vadinHA17; g__Bacteroidetes_vadinHA17; s__uncultured_Bacteroidales
8279429ed454fa5b9dc764b553256ed8	d__Bacteria; p__Verrucomicrobiota; c__Verrucomicrobiae; o__Opitutales; f__Opitutaceae; g__uncultured; s__uncultured_Verrucomicrobia
0f87ed969592e6f0de376fb2c6036631	d__Eukaryota; p__Ascomycota; c__Leotiomycetes; o__Helotiales
e75e2198fe73d35b777d4d1220337318	d__Bacteria; p__Acidobacteriota; c__Acidobacteriae; o__Subgroup_2; f__Subgroup_2; g__Subgroup_2; s__uncultured_Holophaga
fc62247091338968357b6b8f281587b8	d__Bacteria; p__Patescibacteria; c__Parcubacteria; o__Parcubacteria; f__Parcubacteria; g__Parcubacteria; s__uncultured_bacterium
bfa68698918a0c634ad839660c85a676	d__Bacteria; p__Acidobacteriota; c__Acidobacteriae; o__Subgroup_2; f__Subgroup_2; g__Subgroup_2; s__uncultured_forest
e68f68fd825e1735065bb84c796e23c0	d__Bacteria; p__Proteobacteria; c__Gammaproteobacteria; o__Burkholderiales; f__Nitrosomonadaceae; g__GOUTA6
d6475b36eded8ee07de40d9fe075b22b	d__Bacteria; p__Bacteroidota; c__Bacteroidia; o__Bacteroidales; f__Prolixibacteraceae; g__BSV13; s__uncultured_Bacteroidetes
ffa0f9cf41c0388e0e5cc759580b1c5d	d__Bacteria; p__Proteobacteria; c__Gammaproteobacteria; o__Burkholderiales; f__Chromobacteriaceae; g__Paludibacterium
a6165a1856b73a9683681758c25e5482	d__Bacteria; p__Bacteroidota; c__Bacteroidia; o__Bacteroidales; f__Bacteroidaceae; g__Bacteroides
b058b2b86bee4b23743234ee8cc47b2f	d__Bacteria; p__Chloroflexi; c__KD4-96; o__KD4-96; f__KD4-96; g__KD4-96; s__uncultured_Chloroflexi
47b6c3c370b919e90fade1697d7e7fea	d__Bacteria; p__Proteobacteria; c__Gammaproteobacteria; o__Burkholderiales; f__Oxalobacteraceae; g__uncultured; s__bacterium_enrichment
695159c2c46b509cdc37a49de99c0f48	d__Archaea; p__Crenarchaeota; c__Nitrososphaeria; o__Group_1.1c; f__Group_1.1c; g__Group_1.1c
57e5fccf47d4c5d2302f611484d21d00	d__Bacteria; p__Chloroflexi; c__AD3; o__AD3; f__AD3; g__AD3; s__uncultured_bacterium
1cff655772cb075f6e9e7f6023fa7a1a	d__Bacteria; p__Verrucomicrobiota; c__Verrucomicrobiae; o__Opitutales; f__Opitutaceae; g__uncultured; s__uncultured_bacterium
606c5f317f1b80904a3ddca823d4273b	d__Bacteria; p__Chloroflexi; c__Anaerolineae; o__Anaerolineales; f__Anaerolineaceae; g__uncultured; s__uncultured_prokaryote
9e3e90646d4380b981eac719a72da203	d__Bacteria; p__Chloroflexi; c__Anaerolineae; o__Anaerolineales; f__Anaerolineaceae; g__Leptolinea; s__uncultured_eubacterium
3bcd8aaca575b1f785abcd27db6e6d76	d__Bacteria; p__Actinobacteriota; c__Acidimicrobiia; o__uncultured; f__uncultured; g__uncultured
6f83310d9afe738fc0ca43cafc7eadf7	d__Bacteria; p__Chloroflexi; c__AD3; o__AD3; f__AD3; g__AD3; s__uncultured_Thermomicrobia
abbe2037c62cbffbaf67c45bea8caf77	d__Bacteria; p__Proteobacteria; c__Gammaproteobacteria; o__Burkholderiales; f__Comamonadaceae
271d812035c45ea23e14ce4a372ed0fd	d__Bacteria; p__Proteobacteria; c__Gammaproteobacteria
0c267c07b0138c833ccbbc2fa372f572	d__Bacteria; p__Acidobacteriota; c__Holophagae; o__Holophagales; f__Holophagaceae
486e1fddd9c83b9fe2506a6623bfbaeb	d__Bacteria; p__Firmicutes; c__Negativicutes; o__Veillonellales-Selenomonadales; f__Selenomonadaceae; g__Zymophilus; s__Propionispira_paucivorans
57aa55bc02833f1c40c28b54146fe831	d__Bacteria; p__Acidobacteriota; c__Holophagae; o__Holophagales; f__Holophagaceae
0c2db1da1af7a2217dc836906f8e9be7	d__Bacteria; p__Firmicutes; c__Negativicutes; o__Veillonellales-Selenomonadales; f__Sporomusaceae; g__uncultured
84c89c91f14ec22ea8c7edbfb715b5d4	d__Bacteria; p__Patescibacteria; c__Microgenomatia; o__Candidatus_Levybacteria; f__Candidatus_Levybacteria; g__Candidatus_Levybacteria; s__uncultured_bacterium
09cb654ef8ed282b030b3d6cabb778f7	d__Bacteria; p__Bacteroidota; c__Ignavibacteria; o__Ignavibacteriales
24c9c62781c2fe4ef104b172b35337d5	d__Bacteria; p__Proteobacteria; c__Alphaproteobacteria; o__Rhizobiales; f__Beijerinckiaceae; g__Roseiarcus; s__uncultured_bacterium
ca81601072b05a889f2019fcf67857f9	d__Bacteria; p__Acidobacteriota; c__Acidobacteriae; o__Subgroup_2; f__Subgroup_2; g__Subgroup_2; s__uncultured_Holophaga
5839a5cf667318db8e1187c298e9462b	d__Bacteria; p__Proteobacteria; c__Gammaproteobacteria; o__Burkholderiales; f__Nitrosomonadaceae; g__GOUTA6
4aaf9302b7bd070062581fe765667bee	d__Bacteria; p__Bacteroidota; c__Ignavibacteria; o__Ignavibacteriales
dc9e55a91b8f28966acedbb7e3f3e029	d__Bacteria; p__Acidobacteriota; c__Acidobacteriae; o__Acidobacteriales; f__uncultured; g__uncultured; s__uncultured_Holophaga
715c4a330f7fb0e1561b378118220be7	d__Bacteria; p__Planctomycetota; c__Planctomycetes; o__Pirellulales; f__Pirellulaceae
98988103c71863fcfbd858eb89452c52	d__Bacteria; p__Actinobacteriota; c__Actinobacteria; o__Propionibacteriales; f__Propionibacteriaceae; g__Aestuariimicrobium; s__uncultured_bacterium
8e17454cad3ff5d9bdf42268823fc413	d__Bacteria; p__Patescibacteria; c__Microgenomatia; o__Candidatus_Levybacteria; f__Candidatus_Levybacteria; g__Candidatus_Levybacteria; s__uncultured_bacterium
36d69d193d92e4df054c5baf6639dfe9	d__Bacteria; p__Acidobacteriota; c__Acidobacteriae; o__Solibacterales; f__Solibacteraceae; g__Candidatus_Solibacter
e054a528f91b4f39a2a51df1e2f2ac34	d__Bacteria; p__Actinobacteriota; c__Actinobacteria; o__Micrococcales; f__Demequinaceae; g__Demequina
cde93697b24d258bce067ca6762313ee	d__Bacteria; p__Proteobacteria; c__Gammaproteobacteria; o__Burkholderiales; f__Nitrosomonadaceae; g__GOUTA6
a6531a276a746b105bfd86cf71073dc4	d__Bacteria; p__Fibrobacterota; c__Fibrobacteria; o__Fibrobacterales; f__Fibrobacteraceae; g__uncultured; s__metagenome
408a2078a83114e0872f809c05a6b62b	d__Bacteria; p__Acidobacteriota; c__Acidobacteriae; o__Acidobacteriales; f__Koribacteraceae; g__Candidatus_Koribacter
bee39b153d4d386a716cdfc753665253	d__Bacteria; p__Bacteroidota; c__Bacteroidia; o__Bacteroidales; f__Paludibacteraceae; g__uncultured; s__marine_metagenome
1fc4099d8b4e703145d8fc67ec5c45c0	d__Bacteria; p__Acidobacteriota; c__Acidobacteriae; o__Acidobacteriales; f__Koribacteraceae; g__Candidatus_Koribacter
d4a5ce0279d94820b2da50e50eae48c1	d__Bacteria; p__Acidobacteriota; c__Acidobacteriae; o__Acidobacteriales; f__Koribacteraceae; g__Candidatus_Koribacter; s__uncultured_Acidobacteria
ec1f38d2f86716ee72eed264d4dec593	d__Bacteria; p__Acidobacteriota; c__Acidobacteriae; o__Acidobacteriales; f__uncultured; g__uncultured
5379df71112c4c1155d7bda0425e51c3	d__Bacteria; p__Acidobacteriota; c__Acidobacteriae; o__Acidobacteriales; f__Koribacteraceae; g__Candidatus_Koribacter; s__uncultured_Acidobacteria
eddb75946d8185b1589b220c6dc35d9e	d__Bacteria; p__Actinobacteriota; c__Actinobacteria; o__Micrococcales; f__Intrasporangiaceae; g__Oryzihumus; s__uncultured_bacterium
21483029df9e0ac466bb76c7405b96f8	d__Bacteria; p__Actinobacteriota; c__Thermoleophilia; o__Solirubrobacterales; f__Solirubrobacteraceae
afae7a9ec2b39c3a6c35514fef78c139	d__Bacteria; p__Verrucomicrobiota; c__Verrucomicrobiae; o__Pedosphaerales; f__Pedosphaeraceae; g__Ellin516; s__uncultured_bacterium
7400b334235b8fb46b47b079908f2f3c	d__Bacteria; p__Proteobacteria; c__Gammaproteobacteria; o__Burkholderiales; f__Comamonadaceae
9440eff67cea34d4f561f4442220fd0c	d__Bacteria; p__Bacteroidota; c__Bacteroidia; o__Sphingobacteriales; f__Lentimicrobiaceae; g__Lentimicrobiaceae; s__uncultured_bacterium
e895ef6076f7fec58425646a9d674be0	d__Bacteria; p__Acidobacteriota; c__Acidobacteriae; o__Subgroup_2; f__Subgroup_2; g__Subgroup_2; s__uncultured_forest
434faf3f42d0c69bd2c429e584eb8070	d__Bacteria; p__Actinobacteriota; c__Thermoleophilia; o__Solirubrobacterales; f__Solirubrobacteraceae; g__uncultured; s__uncultured_bacterium
ee69dd8f58b253dab71a9ee366689e63	d__Bacteria; p__Patescibacteria; c__Parcubacteria; o__Parcubacteria; f__Parcubacteria; g__Parcubacteria; s__uncultured_bacterium
d1cc484709c401b3831f08b35c9aeb6b	d__Bacteria; p__Proteobacteria; c__Alphaproteobacteria; o__Sphingomonadales; f__Sphingomonadaceae; g__Novosphingobium; s__Novosphingobium_acidiphilum
61a2bb4cb94222bb6efe99a335254cc0	d__Bacteria; p__Acidobacteriota; c__Acidobacteriae; o__Solibacterales; f__Solibacteraceae; g__Candidatus_Solibacter
2632a6d31503d4266799785e6be9ba62	d__Bacteria; p__Actinobacteriota; c__Thermoleophilia; o__Solirubrobacterales; f__Solirubrobacteraceae; g__Conexibacter
ee3dc204baae54ca0bd1f942e1f73f13	d__Bacteria; p__Actinobacteriota; c__Acidimicrobiia; o__IMCC26256; f__IMCC26256; g__IMCC26256
88df4825671cbe1d98700c59fc30142c	d__Bacteria; p__Patescibacteria; c__Parcubacteria; o__Parcubacteria; f__Parcubacteria; g__Parcubacteria; s__uncultured_bacterium
63d1005fd9267574a45bdd5798dfdf01	d__Bacteria; p__Acidobacteriota; c__Acidobacteriae; o__Acidobacteriales; f__uncultured; g__uncultured; s__uncultured_bacterium
cd1c7ff9051b63b280ec923ec795422c	d__Bacteria; p__Proteobacteria; c__Gammaproteobacteria; o__Burkholderiales; f__Rhodocyclaceae
6b54fe36fa538eac8f29378f05689e2b	d__Bacteria; p__Gemmatimonadota; c__Gemmatimonadetes; o__Gemmatimonadales; f__Gemmatimonadaceae; g__uncultured; s__uncultured_Gemmatimonadales
7774d6d4a721a8ee3a6088589fa41d7d	d__Archaea; p__Euryarchaeota; c__Methanobacteria; o__Methanobacteriales; f__Methanobacteriaceae; g__Methanobacterium
af78a220ddc4b573b9cd481cbd1f3e26	d__Bacteria; p__Patescibacteria; c__Microgenomatia; o__Candidatus_Woesebacteria; f__Candidatus_Woesebacteria; g__Candidatus_Woesebacteria; s__uncultured_Microgenomates
ae31f94433a8e2a33836c9fe90297657	d__Bacteria; p__Actinobacteriota; c__Actinobacteria
200258b26b43c65100231cefb9f0785d	d__Bacteria; p__Acidobacteriota; c__Acidobacteriae; o__Solibacterales; f__Solibacteraceae; g__Candidatus_Solibacter
22ed42384d157cdfd56e750261fbacfc	d__Bacteria; p__Chloroflexi; c__KD4-96; o__KD4-96; f__KD4-96; g__KD4-96
619dd1bf243615d6d190324b2b3fa964	d__Eukaryota; p__Ascomycota; c__Leotiomycetes; o__Thelebolales; f__Thelebolaceae
d0b764f6e5a14c72a20c0b1d1f550cf5	d__Bacteria; p__Acidobacteriota; c__Acidobacteriae
1b2ebbced14f60a2dd618edfe800f989	d__Bacteria; p__Proteobacteria; c__Alphaproteobacteria; o__Rhizobiales; f__Xanthobacteraceae; g__uncultured
3a0eb8b69ea89140baa01d336a586a2a	d__Bacteria; p__Planctomycetota; c__Planctomycetes; o__Pirellulales; f__Pirellulaceae
e19ed8471a821646ee8f4ac388c344e5	d__Bacteria; p__Desulfobacterota; c__Syntrophia; o__Syntrophales; f__Syntrophaceae; g__Syntrophus
3de7ba5f232c56da29296b05c5c9847a	d__Bacteria; p__Acidobacteriota; c__Acidobacteriae; o__Subgroup_2; f__Subgroup_2; g__Subgroup_2
5e7163715ec6d012a2eff14309cb5fa5	d__Bacteria; p__Acidobacteriota; c__Acidobacteriae; o__Acidobacteriales; f__Koribacteraceae; g__Candidatus_Koribacter
cc59bf51df3d260389002e004d9d9ce8	d__Bacteria; p__Desulfobacterota; c__Syntrophia; o__Syntrophales; f__Smithellaceae; g__Smithella
e9904ec34283784eebb530375ed73625	d__Archaea; p__Euryarchaeota; c__Methanobacteria; o__Methanobacteriales; f__Methanobacteriaceae; g__Methanobacterium
d819baa6602aa6ce129b572d759e6ec0	d__Eukaryota
2483e82dfe3cc42de60b46086307bb37	d__Bacteria; p__Desulfobacterota; c__Syntrophia; o__Syntrophales; f__Smithellaceae; g__Smithella
8936b96ff4816183af84cfcd49e3d4cd	d__Bacteria; p__Proteobacteria; c__Gammaproteobacteria; o__Methylococcales; f__Methylomonadaceae
ad5d5742592bd8bc0948a1282b14f0dc	d__Bacteria; p__Firmicutes; c__Negativicutes; o__Veillonellales-Selenomonadales; f__Sporomusaceae; g__uncultured
e840c365cf0b0f1d0862f5f9e4c55607	d__Bacteria; p__Patescibacteria; c__Parcubacteria; o__Parcubacteria; f__Parcubacteria; g__Parcubacteria; s__uncultured_bacterium
73e5a429eb8697b49278326d4a2a4963	d__Bacteria; p__Planctomycetota; c__Planctomycetes; o__Pirellulales; f__Pirellulaceae
b5e56b34a221f8e007865e47511845d8	d__Bacteria; p__Bacteroidota; c__Ignavibacteria; o__Ignavibacteriales
076f535fe0e98891a09b2cfa303186df	d__Bacteria; p__Proteobacteria; c__Alphaproteobacteria; o__Sphingomonadales; f__Sphingomonadaceae; g__Novosphingobium; s__Novosphingobium_tardaugens
a3e3e2ea57a6ecf78322c346bc68f583	d__Bacteria; p__Actinobacteriota; c__Actinobacteria; o__Frankiales; f__Acidothermaceae; g__Acidothermus
1be72f21e9d9023d762de89ab1157486	d__Bacteria; p__Desulfobacterota; c__Syntrophia; o__Syntrophales; f__Smithellaceae; g__Smithella
c8632eb7a132b7d0fe6826d1677d8ef5	d__Bacteria; p__Actinobacteriota; c__Actinobacteria; o__Frankiales; f__Acidothermaceae; g__Acidothermus; s__uncultured_Thermomonosporaceae
a1cbe74a8164a2425cdd95a6637b29cd	d__Bacteria; p__Patescibacteria; c__Microgenomatia; o__Candidatus_Levybacteria; f__Candidatus_Levybacteria; g__Candidatus_Levybacteria; s__uncultured_bacterium
e75cf83d6a257477c5fa0ffd3101db31	d__Bacteria; p__Chloroflexi; c__AD3; o__AD3; f__AD3; g__AD3; s__uncultured_Chloroflexi
23cd307feb556ed3f0d0a2c35c29d9eb	d__Bacteria; p__Bacteroidota; c__Bacteroidia; o__Bacteroidales; f__Bacteroidaceae; g__Bacteroides
06974553257e8216fd365d1edc2f910a	d__Bacteria; p__Fibrobacterota; c__Fibrobacteria; o__Fibrobacterales; f__Fibrobacteraceae; g__uncultured; s__metagenome
2dc82bf7b067ff326f7f3cce0dfe07f6	d__Bacteria; p__Desulfobacterota; c__Syntrophia; o__Syntrophales; f__Smithellaceae; g__Smithella
f5dc38067f554a56a0928100005dbab4	d__Bacteria; p__Gemmatimonadota; c__Gemmatimonadetes; o__Gemmatimonadales; f__Gemmatimonadaceae; g__uncultured
665ebc4cd965197ed5865c9946304c7c	d__Bacteria; p__Acidobacteriota; c__Acidobacteriae; o__Acidobacteriales; f__Acidobacteriaceae_(Subgroup_1)
a53e8b09ead2aeef2b257308ab9388d5	d__Bacteria; p__Caldisericota; c__Caldisericia; o__Caldisericales; f__Caldisericaceae; g__Caldisericum
f2b199928e63cc994aca1c7a481bb7ef	d__Bacteria; p__Proteobacteria; c__Gammaproteobacteria; o__Methylococcales; f__Methylomonadaceae
ad5b81ea6ee01d92fc87985faa73e4fd	d__Bacteria; p__Acidobacteriota; c__Acidobacteriae; o__Subgroup_2; f__Subgroup_2; g__Subgroup_2; s__uncultured_forest
99d32173086b232ba4e79babc86dd3fd	d__Bacteria; p__Proteobacteria; c__Gammaproteobacteria; o__JG36-TzT-191; f__JG36-TzT-191; g__JG36-TzT-191; s__uncultured_bacterium
3d83e4f6d7f1c2f3cf7318e0f4f97443	d__Bacteria; p__Proteobacteria; c__Alphaproteobacteria; o__Rhizobiales; f__Xanthobacteraceae; g__Bradyrhizobium
aea271bb35b8b557a6e3e6203c8ae0ab	d__Bacteria; p__Actinobacteriota; c__Acidimicrobiia; o__uncultured; f__uncultured; g__uncultured; s__uncultured_Actinomycetales
034a38b9beed3c9bc8dd8f44c8a2fb12	d__Bacteria; p__Acidobacteriota; c__Acidobacteriae; o__Subgroup_2; f__Subgroup_2; g__Subgroup_2
4742932ec290724e252fe697cfc6fc4f	d__Bacteria; p__Proteobacteria; c__Alphaproteobacteria; o__Rhizobiales; f__Beijerinckiaceae; g__Rhodoblastus
093fa827577f9f14ed3ad6371b21a0a7	d__Bacteria; p__Actinobacteriota; c__Actinobacteria; o__Propionibacteriales; f__Propionibacteriaceae; g__Aestuariimicrobium; s__uncultured_bacterium
0e4f24bdeb1b1717a04ef6f9f764cee3	d__Bacteria; p__Acidobacteriota; c__Acidobacteriae; o__Acidobacteriales; f__uncultured; g__uncultured; s__uncultured_Holophaga
d88a93ca13bee31edf15dffeae2e88cb	d__Eukaryota; p__Phragmoplastophyta; c__Embryophyta
7780844939e0b182eb82ca034ad52878	d__Bacteria; p__Acidobacteriota; c__Acidobacteriae; o__Subgroup_2; f__Subgroup_2; g__Subgroup_2
ecfca9a41badf662032f5108d8e22b32	d__Bacteria; p__Gemmatimonadota; c__Gemmatimonadetes; o__Gemmatimonadales; f__Gemmatimonadaceae; g__uncultured; s__uncultured_Gemmatimonadales
d7de87206d970604ac506b13a13061c5	d__Bacteria; p__Gemmatimonadota; c__Gemmatimonadetes; o__Gemmatimonadales; f__Gemmatimonadaceae; g__uncultured; s__uncultured_Gemmatimonadales
02115cef3fa6a73929f450bf4979f255	d__Bacteria; p__Acidobacteriota; c__Acidobacteriae; o__Acidobacteriales; f__Acidobacteriaceae_(Subgroup_1); g__Occallatibacter
25121b4f88e9b50aa1cac501b6c9c98d	d__Bacteria; p__Armatimonadota; c__Fimbriimonadia; o__Fimbriimonadales; f__Fimbriimonadaceae; g__Fimbriimonas
183e828f834834396761938614e4b61d	d__Bacteria; p__Patescibacteria; c__Microgenomatia; o__Candidatus_Shapirobacteria; f__Candidatus_Shapirobacteria; g__Candidatus_Shapirobacteria; s__uncultured_bacterium
840673c72bf4bf83629498b07fa03dc4	d__Bacteria; p__Verrucomicrobiota; c__Verrucomicrobiae; o__Opitutales; f__Opitutaceae
1df80ae330e87581645fd8e66ea8a362	d__Bacteria; p__Bacteroidota; c__Bacteroidia; o__Bacteroidales; f__Bacteroidaceae; g__Bacteroides
e677e61592637c89a6b98a2626df8774	d__Bacteria; p__Bacteroidota; c__Bacteroidia; o__Bacteroidales; f__Prolixibacteraceae; g__BSV13
0d2968c56a0e72a971ebb3cb3e6e073b	d__Bacteria; p__Chloroflexi; c__KD4-96; o__KD4-96; f__KD4-96; g__KD4-96
7e706b841fee3e717ab73a750597dd32	d__Bacteria; p__Patescibacteria; c__Microgenomatia; o__Candidatus_Levybacteria; f__Candidatus_Levybacteria; g__Candidatus_Levybacteria; s__uncultured_bacterium
0537d4463e48d0ef07f040a2b602c0fa	d__Bacteria; p__Patescibacteria; c__Microgenomatia; o__Candidatus_Roizmanbacteria; f__Candidatus_Roizmanbacteria; g__Candidatus_Roizmanbacteria; s__uncultured_bacterium
c493f56aaebc522ddce6e305edc3762b	d__Bacteria; p__Verrucomicrobiota; c__Verrucomicrobiae; o__Opitutales; f__Opitutaceae; g__Lacunisphaera; s__metagenome
c3d57cef38b915b3a87061dfc2cc2f2a	d__Bacteria; p__Proteobacteria; c__Gammaproteobacteria; o__JG36-TzT-191; f__JG36-TzT-191; g__JG36-TzT-191; s__uncultured_gamma
7c3c9167e12d40e87fc98a08cccfb23a	d__Bacteria; p__Verrucomicrobiota; c__Verrucomicrobiae; o__Pedosphaerales; f__Pedosphaeraceae; g__ADurb.Bin063-1
3ac8e3078bce32a0b64f73a6df66b5a7	d__Bacteria; p__Actinobacteriota; c__Thermoleophilia; o__Solirubrobacterales; f__Solirubrobacteraceae; g__uncultured; s__uncultured_bacterium
253049fd307692068004ea30d6eeb790	d__Archaea; p__Crenarchaeota; c__Nitrososphaeria; o__Group_1.1c; f__Group_1.1c; g__Group_1.1c
a395a4c84b0af1ecfb7d4ef3f79f5b17	d__Bacteria; p__Chloroflexi; c__AD3; o__AD3; f__AD3; g__AD3
96fbf91b3ccb5e61df273eaac0d782df	d__Bacteria; p__Bacteroidota; c__Bacteroidia; o__Bacteroidales; f__Bacteroidetes_vadinHA17; g__Bacteroidetes_vadinHA17; s__uncultured_Bacteroidales
7ca9e62279e74ee7a33d12d6342cf45d	d__Bacteria; p__Cyanobacteria; c__Cyanobacteriia; o__Chloroplast; f__Chloroplast; g__Chloroplast; s__Carex_siderosticta
e852ced98e08bd4543dc5b6558376673	d__Bacteria; p__Firmicutes; c__Negativicutes; o__Veillonellales-Selenomonadales; f__uncultured; g__uncultured; s__uncultured_bacterium
fb235301195cab2d9d225970b45ec267	d__Bacteria; p__Actinobacteriota; c__Actinobacteria; o__Frankiales; f__Acidothermaceae; g__Acidothermus
a4ec5740031ed667d047c8021d043bb9	d__Bacteria; p__Verrucomicrobiota; c__Verrucomicrobiae; o__Opitutales; f__Opitutaceae; g__uncultured; s__uncultured_bacterium
17c38a54a384c87f150876908c98e354	d__Bacteria; p__Actinobacteriota; c__Actinobacteria; o__Frankiales; f__Acidothermaceae; g__Acidothermus; s__uncultured_Actinomycetales
f8363d31f9983b1651c2576fe909e9c1	d__Bacteria; p__Acidobacteriota; c__Acidobacteriae; o__Solibacterales; f__Solibacteraceae; g__Candidatus_Solibacter; s__uncultured_Acidobacteria
7b570c66bd175b5062224d9f768366e0	d__Bacteria; p__Cyanobacteria; c__Cyanobacteriia; o__Chloroplast; f__Chloroplast; g__Chloroplast; s__Carex_siderosticta
baf679f7cf34ab5e4761c4c3c82b6e05	d__Bacteria; p__Desulfobacterota; c__Syntrophia; o__Syntrophales; f__Smithellaceae; g__Smithella
0352454e59e1461e51628e29886eef32	d__Bacteria; p__Proteobacteria; c__Alphaproteobacteria; o__Rhizobiales; f__Beijerinckiaceae; g__Roseiarcus; s__uncultured_bacterium
b1a44c683a872aa9faa38ce31fea3b9c	d__Bacteria; p__Verrucomicrobiota; c__Verrucomicrobiae; o__Pedosphaerales; f__Pedosphaeraceae; g__uncultured
506ca1e460c0c35f0e9ae497513ff038	d__Bacteria; p__Planctomycetota; c__Planctomycetes; o__Pirellulales; f__Pirellulaceae
798bf46b31a903defc98c53bda734a60	d__Archaea; p__Halobacterota; c__Methanomicrobia; o__Methanomicrobiales; f__Methanoregulaceae; g__Methanoregula; s__uncultured_archaeon
a5d0d1514b3559fc13afcaceb296b412	d__Bacteria; p__Verrucomicrobiota; c__Verrucomicrobiae; o__Pedosphaerales; f__Pedosphaeraceae; g__uncultured
8514c5f437cf76b2cfba6f8b72dd6632	d__Bacteria; p__Acidobacteriota; c__Acidobacteriae; o__Subgroup_2; f__Subgroup_2; g__Subgroup_2; s__uncultured_Holophaga
d401475b93bd74b3b2ab50217ef813b2	d__Bacteria; p__Patescibacteria; c__CPR2; o__CPR2; f__CPR2; g__CPR2; s__uncultured_Clostridium
3544332235272aa2fd6709f034d967bc	d__Archaea; p__Euryarchaeota; c__Methanobacteria; o__Methanobacteriales; f__Methanobacteriaceae; g__Methanobacterium
c6d5a2409fee3cbe48bd6a6065e9efc5	d__Bacteria; p__Proteobacteria; c__Gammaproteobacteria
954cbfb15957e69497f977bf7a2506eb	d__Bacteria; p__Verrucomicrobiota; c__Verrucomicrobiae; o__Opitutales; f__Opitutaceae
e03800c8cbb311def2cf4b0374f41b39	d__Bacteria; p__Proteobacteria; c__Gammaproteobacteria; o__Steroidobacterales; f__Steroidobacteraceae
c590c5f1b531a6c3a2a00e5ed9e48234	d__Bacteria; p__Firmicutes; c__Negativicutes; o__Veillonellales-Selenomonadales; f__Sporomusaceae; g__uncultured
26b281744c23d0eb5d4c5a488ac520f8	d__Bacteria; p__Acidobacteriota; c__Acidobacteriae; o__Subgroup_2; f__Subgroup_2; g__Subgroup_2; s__uncultured_forest
267db128583945dd533d298b6e1d2171	d__Bacteria; p__Verrucomicrobiota; c__Verrucomicrobiae; o__Opitutales; f__Opitutaceae; g__Lacunisphaera; s__metagenome
7b47d58ea5d3d2fe3bd940a327af5a6e	d__Bacteria; p__Bacteroidota; c__Ignavibacteria; o__Ignavibacteriales
95d665ca43ed9e36c4f10e454e3336b5	d__Bacteria; p__Acidobacteriota; c__Acidobacteriae; o__Acidobacteriales; f__uncultured; g__uncultured
42045e7d578b52136a438bec38c12289	d__Bacteria; p__Acidobacteriota; c__Acidobacteriae; o__Acidobacteriales; f__Acidobacteriaceae_(Subgroup_1)
f532bda876f4a6153136e3263a3d65d2	d__Bacteria; p__Acidobacteriota; c__Acidobacteriae; o__Acidobacteriales; f__uncultured; g__uncultured; s__uncultured_bacterium
b3c60ee72dd0910251074dc64b348f92	d__Bacteria; p__Acidobacteriota; c__Acidobacteriae; o__Acidobacteriales; f__Acidobacteriaceae_(Subgroup_1)
3ec4411cfbb7fb925c89714e4ea10890	d__Bacteria; p__WPS-2; c__WPS-2; o__WPS-2; f__WPS-2; g__WPS-2; s__uncultured_bacterium
490b26c9f7f193ed4803809f94d9fad3	d__Bacteria; p__Actinobacteriota; c__Actinobacteria; o__Micrococcales; f__Intrasporangiaceae; g__Oryzihumus; s__uncultured_bacterium
70da1565959140f9eb954e9e7ef95352	d__Bacteria; p__Proteobacteria; c__Gammaproteobacteria; o__JG36-TzT-191; f__JG36-TzT-191; g__JG36-TzT-191; s__uncultured_bacterium
6ad3fec24f192f78f0024697ac3dc796	d__Bacteria; p__Bacteroidota; c__Bacteroidia; o__Bacteroidales; f__Paludibacteraceae; g__uncultured
54711634dc03f2e39279b7aa973bf530	d__Bacteria; p__Bacteroidota; c__Bacteroidia; o__Bacteroidales; f__Prolixibacteraceae; g__BSV13; s__uncultured_bacterium
39a643a0a37aeab2e253a0e2e6ad9038	d__Bacteria; p__Chloroflexi; c__Anaerolineae; o__Anaerolineales; f__Anaerolineaceae; g__Leptolinea; s__uncultured_eubacterium
745dd2a697b59d045ded4191e863ba17	d__Bacteria; p__Verrucomicrobiota; c__Verrucomicrobiae; o__Opitutales; f__Opitutaceae; g__uncultured; s__uncultured_bacterium
8476dc1930fff3ba35d28f7ee7b0105a	d__Bacteria; p__Bacteroidota; c__Bacteroidia; o__Bacteroidales; f__Bacteroidaceae; g__Bacteroides; s__uncultured_bacterium
83dec05d943d2ca0d476ae29d4d14062	d__Bacteria; p__Bacteroidota; c__Bacteroidia; o__Bacteroidales; f__Prolixibacteraceae; g__BSV13; s__uncultured_Bacteroidetes
e62ee8253453532bd8dc168fd078045c	d__Bacteria; p__Bacteroidota; c__Bacteroidia; o__Bacteroidales; f__Prolixibacteraceae; g__BSV13
f41423afa09c261659ff59469bebf342	d__Bacteria; p__Proteobacteria; c__Gammaproteobacteria
fba7eba2640d2d0a18068fd9e9473719	d__Eukaryota; p__Basidiomycota; c__Microbotryomycetes; o__Sporidiobolales; f__Sporidiobolaceae; g__Rhodotorula; s__Rhodotorula_glutinis
52a8bfa92f90fecba907102bfc259a05	d__Bacteria; p__Bacteroidota; c__Bacteroidia; o__Bacteroidales; f__Bacteroidetes_vadinHA17; g__Bacteroidetes_vadinHA17
fe063e6531157856b0a5e5d8bd3d04b8	d__Bacteria; p__Cyanobacteria; c__Cyanobacteriia; o__Chloroplast; f__Chloroplast; g__Chloroplast; s__Sphagnum_angustifolium
70b37a6ffb750c0cd0e1304289e0865c	d__Bacteria; p__Proteobacteria; c__Gammaproteobacteria; o__Burkholderiales; f__Comamonadaceae
91a1e4b8be47990151ee76d59f222320	d__Bacteria; p__Desulfobacterota; c__Syntrophia; o__Syntrophales; f__Smithellaceae; g__Smithella; s__uncultured_bacterium
049b7ac9c7ed93c9e95488c8a2e5f193	d__Bacteria; p__Proteobacteria; c__Gammaproteobacteria; o__Burkholderiales; f__Comamonadaceae
e84e5a928c4455290bc3ba53ce703857	d__Bacteria; p__Bacteroidota; c__Bacteroidia; o__Bacteroidales; f__Bacteroidaceae; g__Bacteroides
4a20239ccff5da9ff167c7c3c8ec51b6	d__Bacteria; p__Actinobacteriota; c__Thermoleophilia; o__Solirubrobacterales; f__Solirubrobacteraceae; g__Conexibacter
318cb1498743e8e4cda662c6b4c93400	d__Bacteria; p__Actinobacteriota; c__Actinobacteria; o__Frankiales; f__Acidothermaceae; g__Acidothermus
97256e75cf6163a7aa2e874357c21c1e	d__Bacteria; p__Proteobacteria; c__Alphaproteobacteria; o__Acetobacterales; f__Acetobacteraceae
d431f2f8037169865a0f8ffc5db98b0c	d__Bacteria; p__Planctomycetota; c__Planctomycetes; o__Pirellulales; f__Pirellulaceae
6d12a39835321e84c2df129a812cf57d	d__Bacteria; p__Bacteroidota; c__Ignavibacteria; o__Ignavibacteriales
79c11b317adfcf3e8506f4038b37f723	d__Bacteria; p__Desulfobacterota; c__Desulfuromonadia; o__Geobacterales; f__Geobacteraceae
34534535dee8d0238b0b9b9322e3fc15	d__Archaea; p__Halobacterota; c__Methanomicrobia; o__Methanomicrobiales; f__Methanoregulaceae; g__Methanoregula
c07d1fef7d62e204bd64f59ef0fdec60	d__Bacteria; p__Proteobacteria; c__Gammaproteobacteria; o__WD260; f__WD260; g__WD260; s__uncultured_bacterium
0c63aadecbc5859e7f4cd3fa6c6c0603	d__Bacteria; p__Acidobacteriota; c__Vicinamibacteria; o__Vicinamibacterales; f__uncultured; g__uncultured
3d8bb9a5ba78f52a03c50dfa084e51a5	d__Bacteria; p__Bacteroidota; c__Kryptonia; o__Kryptoniales; f__BSV26; g__BSV26
bf79f3f9fb5d5212336c47fac9d94ee6	d__Bacteria; p__Acidobacteriota; c__Acidobacteriae; o__Acidobacteriales; f__uncultured; g__uncultured; s__uncultured_bacterium
8490b845fe3d702c37ae27b12106a1b2	d__Bacteria; p__Actinobacteriota; c__Actinobacteria; o__Micrococcales; f__Intrasporangiaceae; g__Oryzihumus; s__uncultured_bacterium
dc87803ff7c5ca2832c7b918c1494e91	d__Bacteria; p__Desulfobacterota; c__Syntrophia; o__Syntrophales; f__Syntrophaceae; g__Syntrophus
fbf753abdb7806f4dc605c57ec82fc6f	d__Bacteria; p__Acidobacteriota; c__Acidobacteriae; o__Acidobacteriales; f__Acidobacteriaceae_(Subgroup_1); g__Occallatibacter
de257095252242f31e719e13d29b8d38	d__Bacteria; p__Proteobacteria; c__Gammaproteobacteria; o__WD260; f__WD260; g__WD260; s__uncultured_bacterium
701907532df07e1da779a708938443d6	d__Bacteria; p__Actinobacteriota; c__Actinobacteria; o__Frankiales; f__Acidothermaceae; g__Acidothermus; s__uncultured_Actinomycetales
77bf560630b4f01abc8db592763aa63d	d__Bacteria; p__Chloroflexi; c__AD3; o__AD3; f__AD3; g__AD3
e7b0eed4bd21963bbbf814c43d13d506	d__Eukaryota; p__Phragmoplastophyta; c__Embryophyta
a9688fe192e858bf5502b63944ad9020	d__Bacteria; p__Acidobacteriota; c__Holophagae; o__Holophagales; f__Holophagaceae; g__Geothrix
9179a272e402c0e8bc925b9390cad4d6	d__Bacteria; p__Acidobacteriota; c__Acidobacteriae; o__Acidobacteriales; f__uncultured; g__uncultured; s__uncultured_Holophaga
1ad0f2c22d14957ceeb1afca51db39c3	d__Bacteria; p__Planctomycetota; c__Planctomycetes; o__Pirellulales; f__Pirellulaceae
4e437ac8a1ebfbc7fc619d612df1fe57	d__Bacteria; p__Desulfobacterota; c__Syntrophia; o__Syntrophales; f__Smithellaceae; g__Smithella
b82385c3e0b26e24422c034863167232	d__Bacteria; p__Actinobacteriota; c__Thermoleophilia; o__Solirubrobacterales; f__Solirubrobacteraceae
563e97baffb739760aece08afa6a439e	d__Eukaryota; p__Basidiomycota; c__Agaricomycetes; o__uncultured; f__uncultured; g__uncultured; s__uncultured_Boletaceae
915ff9314c8812b2e6a90810f403216a	d__Bacteria; p__Patescibacteria; c__Parcubacteria; o__Parcubacteria; f__Parcubacteria; g__Parcubacteria; s__uncultured_bacterium
599a8cf75496aa5a64c6181efe4828e8	d__Bacteria; p__Proteobacteria; c__Alphaproteobacteria; o__Sphingomonadales; f__Sphingomonadaceae; g__Novosphingobium; s__Novosphingobium_tardaugens
83e29539c5f0a3e324c928be443a2536	d__Bacteria; p__Proteobacteria; c__Alphaproteobacteria; o__Rhizobiales; f__Xanthobacteraceae; g__Bradyrhizobium
3c0c418fd102f063749cfd40a26b44bb	d__Bacteria; p__Actinobacteriota; c__Actinobacteria
66e5a78d1b38254a2de7997137e51e6c	d__Bacteria; p__Bacteroidota; c__Bacteroidia; o__Bacteroidales; f__Prolixibacteraceae; g__WCHB1-32
1fee3f739edfde9253fbe869bdcc208b	d__Bacteria; p__Patescibacteria; c__Microgenomatia; o__Candidatus_Shapirobacteria; f__Candidatus_Shapirobacteria; g__Candidatus_Shapirobacteria; s__uncultured_bacterium
933e82a0a6308f54fe53cc9936911796	d__Bacteria; p__RCP2-54; c__RCP2-54; o__RCP2-54; f__RCP2-54; g__RCP2-54; s__uncultured_bacterium
37b3090e82ca4393a8d1c38bcebc69f4	d__Bacteria; p__Proteobacteria; c__Gammaproteobacteria; o__Burkholderiales; f__Nitrosomonadaceae; g__IS-44; s__metagenome
4de253faa5c1214b19ae2c7b9f480d55	d__Archaea; p__Euryarchaeota; c__Methanobacteria; o__Methanobacteriales; f__Methanobacteriaceae; g__Methanobacterium
17305625300e3f3ad14078245f9d762c	d__Bacteria; p__Armatimonadota; c__uncultured; o__uncultured; f__uncultured; g__uncultured; s__uncultured_bacterium
b555fa0ad3c4744c587684184cac3fb3	d__Bacteria; p__Verrucomicrobiota; c__Verrucomicrobiae; o__Opitutales; f__Opitutaceae; g__uncultured; s__uncultured_bacterium
3e8a1aece181ff60e3089196a519b2ff	d__Bacteria; p__Proteobacteria; c__Gammaproteobacteria; o__Steroidobacterales; f__Steroidobacteraceae; g__uncultured
c99b84ac57f660957c4267905ba9337c	d__Bacteria; p__Acidobacteriota; c__Acidobacteriae; o__Subgroup_2; f__Subgroup_2; g__Subgroup_2
9b427add2e43d49682cb1ffad67fe555	d__Bacteria; p__Firmicutes; c__Negativicutes; o__Veillonellales-Selenomonadales
3c7bd3b628120a00edda6e3ff3e997f3	d__Bacteria; p__Actinobacteriota; c__Thermoleophilia; o__Solirubrobacterales; f__Solirubrobacteraceae; g__uncultured
23f0f905c251d377aad06880b50efded	d__Bacteria; p__Proteobacteria; c__Gammaproteobacteria; o__WD260; f__WD260; g__WD260; s__uncultured_bacterium
9bdd43a00b89735955e54a81a6971517	d__Bacteria; p__Proteobacteria; c__Gammaproteobacteria; o__Burkholderiales; f__Oxalobacteraceae; g__uncultured; s__bacterium_enrichment
770433a0ab4667c124047c16bef60416	d__Archaea; p__Thermoplasmatota; c__Thermoplasmata; o__Methanomassiliicoccales; f__Methanomassiliicoccaceae; g__uncultured; s__metagenome
428b075ac8563dc9158a4dd708e81ffa	d__Bacteria; p__Bacteroidota; c__Bacteroidia; o__Bacteroidales; f__Bacteroidetes_vadinHA17; g__Bacteroidetes_vadinHA17; s__uncultured_Bacteroidales
f4b22b7a56668532defc6b8c7704723a	d__Bacteria; p__Actinobacteriota; c__Thermoleophilia; o__Gaiellales; f__uncultured; g__uncultured; s__uncultured_Solirubrobacterales
f6168ed2b404ef0d153626256459f84f	d__Bacteria; p__Actinobacteriota; c__Actinobacteria; o__Frankiales; f__Acidothermaceae; g__Acidothermus; s__uncultured_bacterium
f6e5954d14e3accce4fef5a00492c380	d__Bacteria; p__Firmicutes; c__Clostridia; o__Oscillospirales; f__[Eubacterium]_coprostanoligenes_group; g__[Eubacterium]_coprostanoligenes_group; s__uncultured_Clostridia
66bf8a3f461270b07bd3e739203fa9a6	d__Bacteria; p__Patescibacteria; c__Microgenomatia; o__Candidatus_Gottesmanbacteria; f__Candidatus_Gottesmanbacteria; g__Candidatus_Gottesmanbacteria
a0e7c3ec0e587d04347f755d9404fa1d	d__Bacteria; p__Planctomycetota; c__Planctomycetes; o__Pirellulales; f__Pirellulaceae
e3bb36dcc3df4c43d96fecfc173740e4	d__Bacteria; p__Proteobacteria; c__Gammaproteobacteria; o__Burkholderiales; f__Comamonadaceae
9552e3455ec23c84f00fc90bb6841f4f	d__Bacteria; p__Bacteroidota; c__Bacteroidia; o__Bacteroidales; f__Prolixibacteraceae; g__BSV13; s__uncultured_bacterium
3e2c55a71f6049149da690235b395c0a	d__Eukaryota; p__Phragmoplastophyta; c__Embryophyta; o__Bryophyta; f__Bryophyta; g__Bryophyta; s__Sphagnum_palustre
c6c2b508108df872755bbdda322c3ccb	d__Bacteria; p__Planctomycetota; c__Planctomycetes; o__Pirellulales; f__Pirellulaceae; g__Pir2_lineage
3f44ea6b0bd6f26a83a4e8f67aaf1b7a	d__Bacteria; p__Proteobacteria; c__Gammaproteobacteria; o__Burkholderiales; f__Comamonadaceae; g__Acidovorax
67c4231f252e97c552ee3cf25c1ff631	d__Bacteria; p__Proteobacteria; c__Gammaproteobacteria; o__Burkholderiales; f__Nitrosomonadaceae; g__IS-44; s__metagenome
4f3d44dc0d430d5d3857731234ff2360	d__Eukaryota; p__Basidiomycota; c__Agaricomycetes; o__Agaricales
2004e6216f8838365f84d62dce8c5a86	d__Eukaryota; p__Phragmoplastophyta; c__Embryophyta
a10bc75e017503f2a08e6f781f7cd321	d__Archaea; p__Halobacterota; c__Methanomicrobia; o__Methanomicrobiales; f__Methanoregulaceae; g__Methanoregula
6a1994196b806fc78dceb91f0dce3ae1	d__Bacteria; p__Proteobacteria; c__Alphaproteobacteria; o__Acetobacterales; f__Acetobacteraceae
a37e0c0d0936887f7c772f5b404284fb	d__Bacteria; p__Patescibacteria; c__Parcubacteria; o__Parcubacteria; f__Parcubacteria; g__Parcubacteria; s__uncultured_bacterium
96746843bb03b3ea49e2a91dfd3de34d	d__Bacteria; p__Planctomycetota; c__Planctomycetes; o__Pirellulales; f__Pirellulaceae; g__uncultured
4a0fb0a7764f049b9366e814edc0435e	d__Bacteria; p__Desulfobacterota; c__Syntrophia; o__Syntrophales; f__Smithellaceae; g__Smithella
f31ef0eb059a62171e3e2b72b58919e8	d__Bacteria; p__Firmicutes; c__Negativicutes; o__Veillonellales-Selenomonadales; f__Sporomusaceae; g__uncultured
92910c3575dc5bedd86790d0f9b12187	d__Bacteria; p__Actinobacteriota; c__Actinobacteria; o__Micrococcales; f__Demequinaceae; g__Demequina
28835fc5b5e969a3715978ad663447f1	d__Bacteria; p__Actinobacteriota; c__Acidimicrobiia; o__IMCC26256; f__IMCC26256; g__IMCC26256
bc2a23fb1d38688b2d594ce0c5c34098	d__Bacteria; p__Proteobacteria; c__Alphaproteobacteria; o__Rhizobiales; f__Xanthobacteraceae; g__uncultured
b018acfb12c4fe86916f265c51fcc90f	d__Bacteria; p__Planctomycetota; c__Planctomycetes; o__Isosphaerales; f__Isosphaeraceae; g__Aquisphaera
f6879a3d4b397c108110770db300aea9	d__Bacteria; p__Actinobacteriota; c__Actinobacteria; o__Frankiales; f__Acidothermaceae; g__Acidothermus
6691fe7eb4f385cb9442ceb34cea3415	d__Bacteria; p__Patescibacteria; c__Microgenomatia; o__Candidatus_Woesebacteria; f__Candidatus_Woesebacteria; g__Candidatus_Woesebacteria; s__uncultured_Microgenomates
75fc082f31274ff092a3e68555d378d6	d__Bacteria; p__Actinobacteriota; c__Acidimicrobiia; o__IMCC26256; f__IMCC26256; g__IMCC26256
de87c18955dd92b691535760ae9149cf	d__Bacteria; p__Caldisericota; c__Caldisericia; o__Caldisericales; f__Caldisericaceae; g__Caldisericum; s__uncultured_eubacterium
63e3aab717a230d620b370c690fe8a39	d__Bacteria; p__Proteobacteria; c__Gammaproteobacteria; o__Burkholderiales; f__Nitrosomonadaceae; g__Ellin6067; s__uncultured_beta
fadbca4bc5d4df2626c81e5fe02b242b	d__Bacteria; p__Planctomycetota; c__Phycisphaerae; o__Phycisphaerales; f__AKAU3564_sediment_group; g__AKAU3564_sediment_group; s__uncultured_organism
782083d985b654d6a157d3f85fe73435	d__Bacteria; p__Chloroflexi; c__KD4-96; o__KD4-96; f__KD4-96; g__KD4-96
f2a5b68e70317bb5ce953311956a9f2f	d__Bacteria; p__Actinobacteriota; c__Acidimicrobiia; o__uncultured; f__uncultured; g__uncultured; s__uncultured_forest
fcfe7ec243e43a4b11786401109c0354	d__Bacteria; p__Actinobacteriota; c__Thermoleophilia; o__Gaiellales; f__uncultured; g__uncultured
b46a32ebbce21686194edb3266b4d44e	d__Bacteria; p__Acidobacteriota; c__Acidobacteriae; o__Acidobacteriales; f__uncultured; g__uncultured
620445bb7fc82d57ecc02061c0fb44eb	d__Bacteria; p__Proteobacteria; c__Alphaproteobacteria; o__Rhizobiales; f__Xanthobacteraceae; g__Bradyrhizobium; s__Bradyrhizobium_canariense
21a937d86bf4820d54384d63e1609d2e	d__Bacteria; p__Proteobacteria; c__Alphaproteobacteria; o__Rhizobiales; f__Beijerinckiaceae; g__Roseiarcus; s__uncultured_bacterium
5a4c82ec752674583749e0f1bdd1e50e	d__Archaea; p__Halobacterota; c__Methanomicrobia; o__Methanomicrobiales; f__Rice_Cluster_II; g__Rice_Cluster_II; s__uncultured_methanogenic
de1097b031e91dc60e53517e759a93f2	d__Eukaryota; p__Ascomycota; c__Leotiomycetes; o__Thelebolales; f__Thelebolaceae
c5d473041981a48fcdd0a9295b0e7602	d__Bacteria; p__Acidobacteriota; c__Acidobacteriae
4533b532de4e95d5bba09f44ee151b41	d__Bacteria; p__Proteobacteria; c__Alphaproteobacteria; o__Acetobacterales; f__Acetobacteraceae
1d61eda3e9fb93dd0a050beed419554e	d__Bacteria; p__Bacteroidota; c__Bacteroidia; o__Bacteroidales; f__Bacteroidetes_vadinHA17; g__Bacteroidetes_vadinHA17; s__uncultured_Bacteroidales
531e315283b5b3f3dcbbee311d800d9a	d__Bacteria; p__Verrucomicrobiota; c__Verrucomicrobiae; o__Opitutales; f__Opitutaceae
2ca46905fec5872854170750c751936c	d__Bacteria; p__Proteobacteria; c__Alphaproteobacteria; o__Rhizobiales; f__Xanthobacteraceae; g__Bradyrhizobium; s__Bradyrhizobium_canariense
49adc266f6905bff07cd4abc69739999	d__Bacteria; p__Desulfobacterota; c__Syntrophia; o__Syntrophales; f__Smithellaceae; g__Smithella
3d1d29de996d17cdb0033d00bc0e3f6a	d__Bacteria; p__Acidobacteriota; c__Holophagae; o__Subgroup_7; f__Subgroup_7; g__Subgroup_7; s__uncultured_Thermaerobacter
3e765c39e2fb87cfcdb26dad985df2da	d__Bacteria; p__Patescibacteria; c__Microgenomatia; o__Candidatus_Levybacteria; f__Candidatus_Levybacteria; g__Candidatus_Levybacteria; s__uncultured_bacterium
dde1d5c43cf47c8caec9895c5504ef70	d__Bacteria; p__Actinobacteriota; c__Actinobacteria; o__Frankiales; f__Acidothermaceae; g__Acidothermus
b50843c43a668c915895d00f8e16343f	d__Bacteria; p__Desulfobacterota; c__Desulfuromonadia; o__Geobacterales; f__Geobacteraceae; g__Citrifermentans; s__uncultured_Geobacteraceae
f413518c7b2ddec25f4041a1b1989cde	d__Bacteria; p__Proteobacteria; c__Alphaproteobacteria; o__Acetobacterales; f__Acetobacteraceae; g__uncultured
2d0c707f75bab4ff26eff907e1848ce4	d__Bacteria; p__Caldisericota; c__Caldisericia; o__Caldisericales; f__Caldisericaceae; g__Caldisericum; s__uncultured_eubacterium
8f4c3caad1794fc318634c8a7ce645c4	d__Bacteria; p__Proteobacteria; c__Gammaproteobacteria; o__Burkholderiales; f__Nitrosomonadaceae; g__Ellin6067; s__uncultured_beta
1ad0095be7faf8384d096ded93b11cb2	d__Bacteria; p__Acidobacteriota; c__Holophagae; o__Holophagales; f__Holophagaceae; g__Geothrix
b7cf3e4a3af1781daebce50e49a0cfb4	d__Eukaryota; p__Basidiomycota; c__Agaricomycetes
31eb105b8627336ee5658b77dcb274ca	d__Bacteria; p__Acidobacteriota; c__Acidobacteriae; o__Acidobacteriales; f__Acidobacteriaceae_(Subgroup_1); g__Acidipila; s__uncultured_bacterium
4d553b019643876496eac5b084cd1791	d__Bacteria; p__Bacteroidota; c__Bacteroidia; o__Bacteroidales; f__Prolixibacteraceae; g__WCHB1-32
4094ecba05d3b4e0e7eb65f16869c97f	d__Bacteria; p__Patescibacteria; c__Microgenomatia; o__Candidatus_Roizmanbacteria; f__Candidatus_Roizmanbacteria; g__Candidatus_Roizmanbacteria; s__uncultured_bacterium
1394f04f7fe57c0a21e418108468ee09	d__Bacteria; p__Patescibacteria; c__Microgenomatia; o__Candidatus_Shapirobacteria; f__Candidatus_Shapirobacteria; g__Candidatus_Shapirobacteria; s__uncultured_bacterium
f27f8a0dedd5ae314b6aabd6859de701	d__Bacteria; p__Planctomycetota; c__Planctomycetes; o__Pirellulales; f__Pirellulaceae; g__Pir2_lineage
d2069a7bba61594e41dad46d6976227c	d__Bacteria; p__Bacteroidota; c__Bacteroidia; o__Bacteroidales; f__Prolixibacteraceae; g__BSV13; s__uncultured_bacterium
d84635053d05e31338c6c59de52e54e7	d__Bacteria; p__Verrucomicrobiota; c__Verrucomicrobiae; o__Opitutales; f__Opitutaceae
bfa3664d4b0e973dd2e6272e9254ae32	d__Bacteria; p__Verrucomicrobiota; c__Verrucomicrobiae; o__Opitutales; f__Opitutaceae; g__Opitutus
c4a3cd3f4c6f9c19f9322c48869a6e0b	d__Bacteria; p__Chloroflexi; c__KD4-96; o__KD4-96; f__KD4-96; g__KD4-96; s__uncultured_Chloroflexi
9f2e26d17ff298b6b66a3094c1fa1135	d__Bacteria; p__Bacteroidota; c__Ignavibacteria; o__Ignavibacteriales
b1f8eb0759bab3ebc04eba8aae07cb53	d__Bacteria; p__Acidobacteriota; c__Acidobacteriae; o__Acidobacteriae; f__Acidobacteriae; g__Paludibaculum; s__uncultured_Acidobacteria
e8636b0967d895f0219cc7ea442fec43	d__Bacteria; p__Bacteroidota; c__Bacteroidia; o__Bacteroidales; f__Prolixibacteraceae; g__BSV13
9434c24f45589e5865fe1e8be6d0562c	d__Bacteria; p__Verrucomicrobiota; c__Verrucomicrobiae; o__Pedosphaerales; f__Pedosphaeraceae; g__uncultured
bd14ef59a1cbcf66a326afd83443a446	d__Bacteria; p__Patescibacteria; c__Microgenomatia; o__Candidatus_Roizmanbacteria; f__Candidatus_Roizmanbacteria; g__Candidatus_Roizmanbacteria; s__uncultured_bacterium
4fe4b83a4e5eab6b0792e3994d7af9b4	d__Eukaryota; p__Phragmoplastophyta; c__Embryophyta; o__Bryophyta; f__Bryophyta; g__Bryophyta; s__Sphagnum_palustre
de1423c970cb1f6b416db4cc6093a767	d__Bacteria; p__Proteobacteria; c__Alphaproteobacteria; o__Sphingomonadales; f__Sphingomonadaceae; g__Novosphingobium; s__Novosphingobium_acidiphilum
d60b5b26bed8fd7513bc6164e5ba1140	Unassigned
59ecf3c33e0cc10a9e710a9581ed1694	d__Bacteria; p__Proteobacteria; c__Alphaproteobacteria; o__Acetobacterales; f__Acetobacteraceae; g__uncultured; s__uncultured_bacterium
89d09cbc1d1a217ac1e3e1351c883ea7	d__Archaea; p__Crenarchaeota; c__Bathyarchaeia; o__Bathyarchaeia; f__Bathyarchaeia; g__Bathyarchaeia
6aae380aaafea887f482db679ad3eba0	d__Bacteria; p__Bacteroidota; c__Bacteroidia; o__Bacteroidales; f__Paludibacteraceae; g__uncultured
4a40b50d3ba8c46a679c756abeab02d0	d__Bacteria; p__Proteobacteria; c__Alphaproteobacteria; o__Sphingomonadales; f__Sphingomonadaceae; g__Novosphingobium; s__Novosphingobium_acidiphilum
2904b9c087d54496c6f7e41ca3c20502	d__Bacteria; p__Bacteroidota; c__Ignavibacteria; o__Ignavibacteriales
ec93de24096eca79744c77368eb711f4	d__Bacteria; p__Desulfobacterota; c__Syntrophia; o__Syntrophales; f__Smithellaceae; g__Smithella; s__uncultured_delta
a13cd19b95f6e9c539ff846dc692e997	d__Bacteria; p__Bacteroidota; c__Ignavibacteria; o__Ignavibacteriales
be3556b7f6650a35cc581b0d28b76fc4	d__Bacteria; p__Caldisericota; c__Caldisericia; o__Caldisericales; f__Caldisericaceae; g__Caldisericum; s__uncultured_eubacterium
b90f6ff8bf72ad79f7c084204619f94c	d__Bacteria; p__Acidobacteriota; c__Holophagae; o__Holophagales; f__Holophagaceae; g__Geothrix
92a1a68bd12d7efee9399104caf1ebb0	d__Bacteria; p__Patescibacteria; c__Parcubacteria; o__Parcubacteria; f__Parcubacteria; g__Parcubacteria; s__uncultured_bacterium
c8303eaa96c2a935842963a109232d48	d__Bacteria; p__Acidobacteriota; c__Acidobacteriae; o__Acidobacteriales; f__Acidobacteriaceae_(Subgroup_1); g__Occallatibacter
cb23a8d287d3da103ddff79494d34c57	d__Bacteria; p__Proteobacteria; c__Gammaproteobacteria; o__WD260; f__WD260; g__WD260
752e9e9ae2ce17904fe6a6273da06941	d__Bacteria; p__Bacteroidota; c__Bacteroidia; o__Bacteroidales; f__Bacteroidetes_vadinHA17; g__Bacteroidetes_vadinHA17; s__uncultured_Bacteroidales
e3f88b47ca65ef2a49cd9f37787d7eaf	d__Bacteria; p__Patescibacteria; c__ABY1; o__Candidatus_Falkowbacteria; f__Candidatus_Falkowbacteria; g__Candidatus_Falkowbacteria
cf72a8222cd2906746189cfd1358d5e2	d__Bacteria; p__Actinobacteriota; c__Acidimicrobiia; o__IMCC26256; f__IMCC26256; g__IMCC26256; s__Aciditerrimonas_sp.
4eda8637493f827c12f3c2ba78c376a7	d__Bacteria; p__Fibrobacterota; c__Fibrobacteria; o__Fibrobacterales; f__Fibrobacteraceae; g__uncultured; s__metagenome
fd1dcdd17a256f578c07b94f8bad2450	d__Bacteria; p__Acidobacteriota; c__Acidobacteriae; o__Acidobacteriales; f__uncultured; g__uncultured; s__metagenome
76d276481f31c22e45ea1dc72f2bebb0	d__Bacteria; p__Actinobacteriota; c__Coriobacteriia; o__OPB41; f__OPB41; g__OPB41
123b188b15786b3c5455b9d863bbb3fc	d__Bacteria; p__Verrucomicrobiota; c__Verrucomicrobiae; o__Pedosphaerales; f__Pedosphaeraceae; g__uncultured
a77a775c1b629c153b5aba1703047961	d__Bacteria; p__Bacteroidota; c__Bacteroidia; o__Bacteroidales; f__Bacteroidetes_vadinHA17; g__Bacteroidetes_vadinHA17
db13c3b8d46777a9c0ef60647e2b3b57	d__Bacteria; p__Verrucomicrobiota; c__Verrucomicrobiae; o__Pedosphaerales; f__Pedosphaeraceae; g__ADurb.Bin063-1
ed75a16eb215e0a7c3cc895026a9fc12	d__Bacteria; p__Proteobacteria; c__Gammaproteobacteria; o__Burkholderiales; f__Rhodocyclaceae
3bd5bc580cc6f8238a32d244e430da22	d__Eukaryota; p__Basidiomycota; c__Microbotryomycetes; o__Sporidiobolales; f__Sporidiobolaceae; g__Rhodotorula; s__Rhodotorula_glutinis
84b369e235b9949d3bc09deca2cb00b1	d__Bacteria; p__Acidobacteriota; c__Acidobacteriae; o__Acidobacteriales; f__Acidobacteriaceae_(Subgroup_1)
dc08f4c82914f3a17d4203c37254f3ae	d__Bacteria; p__Acidobacteriota; c__Acidobacteriae
c3fc7a873184a1e1e70f91d61a096ba8	d__Eukaryota; p__Basidiomycota; c__Agaricomycetes
26daa70b68e0ad54083f09ffec055dd8	d__Eukaryota; p__Basidiomycota; c__Agaricomycetes
e02fdadc82705f4d52df39fc974f2d51	d__Archaea; p__Halobacterota; c__Methanomicrobia; o__Methanomicrobiales; f__Rice_Cluster_II; g__Rice_Cluster_II; s__uncultured_methanogenic
cf160f5cbd0e97e1f96401841578679e	d__Bacteria; p__Acidobacteriota; c__Acidobacteriae; o__Solibacterales; f__Solibacteraceae; g__Candidatus_Solibacter; s__uncultured_Acidobacteria
037ea4340551ecb4c4f4277e01d4315c	d__Eukaryota; p__Ascomycota; c__Leotiomycetes; o__Helotiales
fd07d3f9596a2441f372eaa8fdcfd7c6	d__Bacteria; p__Acidobacteriota; c__Acidobacteriae; o__GOUTB8; f__GOUTB8; g__GOUTB8; s__uncultured_bacterium
797b5c5190b8dad391ff1dced71eea56	d__Bacteria; p__Bacteroidota; c__Bacteroidia; o__Bacteroidales; f__Bacteroidetes_vadinHA17; g__Bacteroidetes_vadinHA17
6c18c3439e211c8713b31e596d96b2c9	d__Bacteria; p__Acidobacteriota; c__Acidobacteriae; o__Acidobacteriales; f__Acidobacteriaceae_(Subgroup_1); g__Granulicella
8943349097936ec9beb630097432519f	d__Bacteria; p__Acidobacteriota; c__Acidobacteriae; o__Acidobacteriales; f__uncultured; g__uncultured; s__uncultured_bacterium
4d0cbf2158f30944f8640196caaf8fc5	d__Bacteria; p__Planctomycetota; c__Planctomycetes; o__Pirellulales; f__Pirellulaceae; g__uncultured
abeba731525ca0d7b559876fc3c287ad	d__Eukaryota; p__Basidiomycota; c__Agaricomycetes; o__Agaricales; f__uncultured; g__uncultured; s__uncultured_fungus
ccb9e9beaa905c80d91b3770344d368d	Unassigned
33e95550bffb1e1bc080eee7bb8efd9e	d__Bacteria; p__Patescibacteria; c__Parcubacteria; o__Candidatus_Staskawiczbacteria; f__Candidatus_Staskawiczbacteria; g__Candidatus_Staskawiczbacteria; s__uncultured_bacterium
bf6f7566bda21b4a04b7c6da9bfb47ec	d__Bacteria; p__Proteobacteria; c__Alphaproteobacteria; o__Acetobacterales; f__Acetobacteraceae
a347f5c462b5548599a97ba74aa92121	d__Bacteria; p__Actinobacteriota; c__Actinobacteria
39ef81c4fa3f851edde5dc27ae2430cb	d__Archaea; p__Euryarchaeota; c__Methanobacteria; o__Methanobacteriales; f__Methanobacteriaceae; g__Methanobacterium
cf72127bfa8aeec31a8cb826561006ca	d__Bacteria; p__Proteobacteria; c__Gammaproteobacteria; o__Methylococcales; f__Methylomonadaceae
4c53ce4950cda6757cdaf7a93c2bfca5	d__Bacteria; p__Acidobacteriota; c__Acidobacteriae; o__Acidobacteriales; f__Acidobacteriaceae_(Subgroup_1); g__Occallatibacter; s__bacterium_enrichment
8c00ed30621cea6f46e0869bc6bdd953	d__Bacteria; p__Verrucomicrobiota; c__Verrucomicrobiae; o__Opitutales; f__Opitutaceae
9e3ca243ab1079dd73333d47b5195055	d__Bacteria; p__Actinobacteriota; c__Coriobacteriia; o__OPB41; f__OPB41; g__OPB41
e0a465b6941206bc784a1bc4dae9aa48	d__Eukaryota; p__Basidiomycota; c__Agaricomycetes; o__Agaricales
919edc9764b1ac6823c0ecbc17a9eb9a	d__Bacteria; p__Firmicutes; c__Negativicutes; o__Veillonellales-Selenomonadales; f__Selenomonadaceae; g__Zymophilus; s__Propionispira_paucivorans
93c998dda86de056a6190697354dbe87	d__Archaea; p__Euryarchaeota; c__Methanobacteria; o__Methanobacteriales; f__Methanobacteriaceae; g__Methanobacterium
debea9b4c378923ddb1d06789c8dee1c	d__Bacteria; p__Proteobacteria; c__Gammaproteobacteria; o__Burkholderiales; f__Chromobacteriaceae; g__Paludibacterium
30f057143f1abe0225304cacddde81d7	d__Bacteria; p__Acidobacteriota; c__Holophagae; o__Holophagales; f__Holophagaceae; g__Geothrix
7a1e543fb0fb6ec1723d3f8674c4d202	d__Bacteria; p__Proteobacteria; c__Gammaproteobacteria; o__Burkholderiales; f__Rhodocyclaceae
1b7a0cb9ba38254a04e043f07fcc7a5c	d__Bacteria; p__Acidobacteriota; c__Holophagae; o__Subgroup_7; f__Subgroup_7; g__Subgroup_7; s__uncultured_Thermaerobacter
9f23d78f9d4bdcd959e177916f0db650	d__Bacteria; p__Acidobacteriota; c__Acidobacteriae; o__Acidobacteriales; f__Acidobacteriaceae_(Subgroup_1); g__Occallatibacter; s__bacterium_enrichment
ecf92b94504e45afc6150abdd5146282	d__Bacteria; p__Desulfobacterota; c__Syntrophia; o__Syntrophales; f__Smithellaceae; g__Smithella
cf09e67032e373bfe743a68ade4d9ebb	d__Bacteria; p__Armatimonadota; c__uncultured; o__uncultured; f__uncultured; g__uncultured; s__uncultured_bacterium
41d7548eff23ae73a68d9438018ced15	d__Bacteria; p__Acidobacteriota; c__Acidobacteriae; o__Acidobacteriales; f__uncultured; g__uncultured
df3791b14fcc92c1d0696c7f72febf02	d__Bacteria; p__Acidobacteriota; c__Acidobacteriae; o__Solibacterales; f__Solibacteraceae; g__Candidatus_Solibacter; s__uncultured_Acidobacteria
2bbc2117245583f08ac839ee04797c66	d__Bacteria; p__Acidobacteriota; c__Acidobacteriae; o__Solibacterales; f__Solibacteraceae; g__Candidatus_Solibacter
aa1fc4732349b0af3ee6e38554328bd6	d__Bacteria; p__Desulfobacterota; c__Desulfuromonadia; o__Geobacterales; f__Geobacteraceae
a79b37013d04797ec147fde10a5a95aa	d__Bacteria; p__Acidobacteriota; c__Acidobacteriae; o__Acidobacteriae; f__Acidobacteriae; g__Paludibaculum; s__uncultured_Acidobacteria
32ab11ad03a078a43cd71cd509d93216	d__Bacteria; p__Chloroflexi; c__Anaerolineae; o__Anaerolineales; f__Anaerolineaceae; g__uncultured; s__uncultured_prokaryote
ef404d73713a5d59f6c95b63eb3f1436	d__Bacteria; p__Acidobacteriota; c__Acidobacteriae; o__Subgroup_2; f__Subgroup_2; g__Subgroup_2; s__uncultured_forest
5e6e9a30c010a6e4f16d1130a1a018e1	d__Bacteria; p__Bacteroidota; c__Bacteroidia; o__Sphingobacteriales; f__Lentimicrobiaceae; g__Lentimicrobiaceae; s__uncultured_bacterium
0f54885c251a9bf6697e65b5400dcd8d	d__Bacteria; p__Patescibacteria; c__Microgenomatia; o__Candidatus_Shapirobacteria; f__Candidatus_Shapirobacteria; g__Candidatus_Shapirobacteria; s__metagenome
1104d469eb5eb422331b53e4d4728c5e	d__Bacteria; p__Proteobacteria; c__Gammaproteobacteria; o__Burkholderiales; f__Nitrosomonadaceae; g__GOUTA6
ae44025e6029863f3dfb2b1db60b5897	d__Bacteria; p__Planctomycetota; c__Planctomycetes; o__Pirellulales; f__Pirellulaceae
57c13e1fff9ee5691bb028ba993ea44b	d__Bacteria; p__Chloroflexi; c__Anaerolineae; o__Anaerolineales; f__Anaerolineaceae; g__uncultured; s__uncultured_prokaryote
1f12d4064beae6c6b67afe65c846f381	d__Bacteria; p__Actinobacteriota; c__Actinobacteria; o__Frankiales; f__Acidothermaceae; g__Acidothermus
3fecc756ab6382aa7da3a4e9d62e3994	d__Bacteria; p__Chloroflexi; c__Anaerolineae; o__Anaerolineales; f__Anaerolineaceae; g__Leptolinea; s__uncultured_eubacterium
f227251c670d274014cd71de644a4723	d__Bacteria; p__Acidobacteriota; c__Acidobacteriae; o__Acidobacteriales; f__Koribacteraceae; g__Candidatus_Koribacter
a7a8f40a9822fe7544a4d4da65d5e96a	d__Bacteria; p__Desulfobacterota; c__Syntrophia; o__Syntrophales; f__Smithellaceae; g__Smithella; s__uncultured_delta
fd41d324e0bae032417420a06341f77d	d__Bacteria; p__Proteobacteria; c__Alphaproteobacteria; o__Rhizobiales; f__Beijerinckiaceae; g__Rhodoblastus; s__Rhodoblastus_sphagnicola
5ff9ae2d4c3a2529b727ec84e2a364ee	d__Eukaryota; p__Ciliophora; c__Intramacronucleata; o__Spirotrichea; f__Hypotrichia; g__Oxytricha
1450cc6dcf6a4e3b1af73cd50478ce36	d__Bacteria; p__Bacteroidota; c__Ignavibacteria; o__Ignavibacteriales
e8df4ae2a268534b830e5165ef101e61	d__Bacteria; p__Verrucomicrobiota; c__Verrucomicrobiae; o__Pedosphaerales; f__Pedosphaeraceae; g__uncultured
e8628a13a96f43755b05cacdbd308b1d	d__Bacteria; p__Acidobacteriota; c__Acidobacteriae; o__Acidobacteriae; f__Acidobacteriae; g__Paludibaculum; s__uncultured_Acidobacteria
3acee4fb448e7bd69f89de203145af5e	d__Bacteria; p__Bacteroidota; c__Bacteroidia; o__Bacteroidales; f__Prolixibacteraceae; g__BSV13; s__uncultured_Bacteroidetes
281323f3f601f0f6ec4e15bec3576fa9	d__Bacteria; p__Acidobacteriota; c__Acidobacteriae; o__Acidobacteriales; f__Acidobacteriaceae_(Subgroup_1); g__Occallatibacter
77d3740707ea02627123c4e6968e2593	d__Bacteria; p__Armatimonadota; c__uncultured; o__uncultured; f__uncultured; g__uncultured; s__uncultured_bacterium
4210964e290b7b01594728f4fc5dd45e	d__Bacteria; p__Actinobacteriota; c__Thermoleophilia; o__Gaiellales; f__uncultured; g__uncultured; s__uncultured_bacterium
08f44990691c75e59ea6a45f739d9e5f	d__Bacteria; p__Actinobacteriota; c__Acidimicrobiia; o__uncultured; f__uncultured; g__uncultured; s__uncultured_Actinomycetales
0f9207c1369f55deca473140c3dd8963	d__Bacteria; p__Acidobacteriota; c__Acidobacteriae; o__Acidobacteriales; f__uncultured; g__uncultured; s__uncultured_Holophaga
c8cc59569243f1981719d33390799cfe	d__Bacteria; p__Verrucomicrobiota; c__Omnitrophia; o__Omnitrophales; f__Omnitrophaceae; g__Candidatus_Omnitrophus
0be4168ff86476fe3146a0afe73d830b	d__Bacteria; p__Actinobacteriota; c__Acidimicrobiia; o__uncultured; f__uncultured; g__uncultured; s__uncultured_forest
3a6dc6ff4ce5d59131dcf0016644f0a1	d__Bacteria; p__Actinobacteriota; c__Thermoleophilia; o__Solirubrobacterales; f__Solirubrobacteraceae; g__uncultured; s__uncultured_bacterium
e1ea34432b0b1249f63c77cada967532	d__Bacteria; p__Gemmatimonadota; c__Gemmatimonadetes; o__Gemmatimonadales; f__Gemmatimonadaceae; g__uncultured
495d5dccc864786ad275c33d54e82a5b	d__Bacteria; p__Acidobacteriota; c__Acidobacteriae; o__Acidobacteriales; f__Acidobacteriaceae_(Subgroup_1)
f0d5ad415aa7e6a2a81cc6517af70872	d__Bacteria; p__Proteobacteria; c__Alphaproteobacteria; o__Rhizobiales; f__Xanthobacteraceae; g__Bradyrhizobium
fe77dab76d098611f6d1dd742654bce1	d__Bacteria; p__Patescibacteria; c__Microgenomatia; o__Candidatus_Woesebacteria; f__Candidatus_Woesebacteria; g__Candidatus_Woesebacteria; s__uncultured_Microgenomates
21b343b63be8f5dc9eaca904233a7977	d__Bacteria; p__Proteobacteria; c__Alphaproteobacteria; o__Rhizobiales; f__Xanthobacteraceae; g__Bradyrhizobium; s__Bradyrhizobium_canariense
5233265305b82e225dbc4ae2a00acbf0	d__Bacteria; p__Actinobacteriota; c__Thermoleophilia; o__Solirubrobacterales; f__Solirubrobacteraceae; g__Conexibacter
302bdecfc569419019597ec9eaacf400	d__Bacteria; p__Acidobacteriota; c__Acidobacteriae; o__Solibacterales; f__Solibacteraceae; g__Candidatus_Solibacter; s__uncultured_Acidobacteria
ca9c0aa70f672f222b6b9b8cce35f40d	d__Bacteria; p__Actinobacteriota; c__Actinobacteria; o__Frankiales; f__Acidothermaceae; g__Acidothermus
9ccdd771f0f72d206db59e53e2dab633	d__Bacteria; p__Gemmatimonadota; c__Gemmatimonadetes; o__Gemmatimonadales; f__Gemmatimonadaceae; g__uncultured; s__uncultured_Gemmatimonadaceae
4e37673dd0453f25535ed4d727d6b01f	d__Bacteria; p__Acidobacteriota; c__Acidobacteriae; o__Acidobacteriales; f__Acidobacteriaceae_(Subgroup_1); g__Acidipila; s__uncultured_bacterium
b508ce44f79c32f0f5f47aba0a91c499	d__Bacteria; p__Actinobacteriota; c__Coriobacteriia; o__OPB41; f__OPB41; g__OPB41
da6dec5883887e763cdd80d4626c5d35	d__Bacteria; p__Bacteroidota; c__Bacteroidia; o__Bacteroidales; f__Prolixibacteraceae; g__BSV13
9d55f6a3c6679f66f6a8918e5fbd11f1	d__Bacteria; p__Patescibacteria; c__Microgenomatia; o__Candidatus_Levybacteria; f__Candidatus_Levybacteria; g__Candidatus_Levybacteria; s__uncultured_bacterium
5e75c5a5eca670657097c838da52df4b	d__Bacteria; p__Proteobacteria; c__Alphaproteobacteria; o__Rhizobiales; f__Xanthobacteraceae; g__uncultured
60cbb8b9e6affa84bf5ed96aa4afd5be	d__Bacteria; p__Proteobacteria; c__Gammaproteobacteria; o__Burkholderiales; f__Oxalobacteraceae; g__uncultured
1a67c9f80f1fddb507d337ca07199696	d__Archaea; p__Halobacterota; c__Methanomicrobia; o__Methanomicrobiales; f__Methanoregulaceae; g__Methanoregula
3823e8fc7cc035195af71ee49e3642f0	d__Bacteria; p__Chloroflexi; c__KD4-96; o__KD4-96; f__KD4-96; g__KD4-96
625caaa5c048e4f8d8dad81de645e3f7	d__Eukaryota; p__Basidiomycota; c__Agaricomycetes; o__uncultured; f__uncultured; g__uncultured; s__uncultured_Boletaceae
92f4ffc5578ce55c70ed19da4fa0878b	d__Bacteria; p__Desulfobacterota; c__Desulfuromonadia; o__Geobacterales; f__Geobacteraceae; g__Citrifermentans; s__uncultured_Geobacteraceae
e09e2def7b74db89ad505fcb015119e8	d__Bacteria; p__Actinobacteriota; c__Actinobacteria; o__Frankiales; f__Acidothermaceae; g__Acidothermus
707ecb386319bb86ede503ff1f77e6f9	d__Bacteria; p__Fibrobacterota; c__Fibrobacteria; o__Fibrobacterales; f__Fibrobacteraceae; g__uncultured; s__metagenome
e3836e821875b274586cf05e214defcd	d__Bacteria; p__Actinobacteriota; c__Acidimicrobiia; o__uncultured; f__uncultured; g__uncultured
d95709821c1311dbd3895c3ed229c942	d__Bacteria; p__Proteobacteria; c__Gammaproteobacteria; o__Burkholderiales; f__Nitrosomonadaceae; g__GOUTA6
6ffa49008bca1f1cee508a4459604245	d__Bacteria; p__Proteobacteria; c__Alphaproteobacteria; o__Rhizobiales; f__Xanthobacteraceae; g__uncultured
608487a73a81875cd196aff03e1792fc	d__Eukaryota
239fb6f2c4e58359d24afb870d029ec1	d__Bacteria; p__Bacteroidota; c__Kryptonia; o__Kryptoniales; f__BSV26; g__BSV26
e809f48ac65a33353971efbc72bc9288	d__Bacteria; p__Proteobacteria; c__Alphaproteobacteria; o__Rhizobiales; f__Beijerinckiaceae; g__Roseiarcus
46cbe5521741472e2b39c7a33a59fb85	d__Eukaryota; p__Ascomycota; c__Leotiomycetes; o__Thelebolales; f__Thelebolaceae
fac834fe238d86101eba3eb3d799018b	d__Bacteria; p__Desulfobacterota; c__Syntrophia; o__Syntrophales; f__Smithellaceae; g__Smithella; s__uncultured_bacterium
491ce2f3b2d8bb40ea6f5fed75d6dcd0	d__Bacteria; p__Proteobacteria; c__Gammaproteobacteria; o__Burkholderiales; f__Comamonadaceae
9dace0861e849d7a3e082c51a4b1c516	d__Bacteria; p__Acidobacteriota; c__Acidobacteriae; o__Solibacterales; f__Solibacteraceae; g__Candidatus_Solibacter; s__uncultured_Acidobacteria
5277fbc72c0a1ed1c71ed467301a78ff	d__Bacteria; p__Actinobacteriota; c__Actinobacteria; o__Frankiales; f__Acidothermaceae; g__Acidothermus
7e9f20dcbe1a4e206595504ea6b00371	d__Bacteria; p__Proteobacteria; c__Gammaproteobacteria; o__WD260; f__WD260; g__WD260; s__uncultured_bacterium
cfa6787b13c7ad529ddd46a98496ac37	d__Bacteria; p__Actinobacteriota; c__Actinobacteria; o__Frankiales; f__Acidothermaceae; g__Acidothermus
c0d3eaad66257c91678e06a2098a00cb	d__Bacteria; p__Patescibacteria; c__Microgenomatia; o__Candidatus_Levybacteria; f__Candidatus_Levybacteria; g__Candidatus_Levybacteria; s__uncultured_bacterium
e60d07fc5f1f961eaa2b5cb7af69c73c	d__Bacteria; p__Acidobacteriota; c__Acidobacteriae; o__Solibacterales; f__Solibacteraceae; g__Candidatus_Solibacter
dff8709a01542aecdb9d55b91bcdf51d	d__Bacteria; p__WPS-2; c__WPS-2; o__WPS-2; f__WPS-2; g__WPS-2; s__uncultured_bacterium
813f1d7cc727e2d57daa029d99ee7462	d__Bacteria; p__Proteobacteria; c__Gammaproteobacteria; o__JG36-TzT-191; f__JG36-TzT-191; g__JG36-TzT-191; s__uncultured_gamma
e7563282c1d3a234bd5940b298c4edd3	d__Bacteria; p__Proteobacteria; c__Gammaproteobacteria; o__JG36-TzT-191; f__JG36-TzT-191; g__JG36-TzT-191; s__uncultured_bacterium
dd8d34aea17df6901c2331fe8252fa42	d__Bacteria; p__Proteobacteria; c__Gammaproteobacteria; o__Burkholderiales; f__Comamonadaceae
1ddabc044cc5270019e5d54fa5f5f96b	d__Bacteria; p__Proteobacteria; c__Gammaproteobacteria; o__Burkholderiales; f__Gallionellaceae; g__Sideroxydans
88eb98a2aeb321c016153fcb0aa4b2f2	d__Bacteria; p__Acidobacteriota; c__Acidobacteriae; o__Acidobacteriales; f__Acidobacteriaceae_(Subgroup_1)
40750bf55413d7aa6cf87d15220c2fcc	d__Archaea; p__Crenarchaeota; c__Bathyarchaeia; o__Bathyarchaeia; f__Bathyarchaeia; g__Bathyarchaeia
6b7df0f2c1752943e86e6de128f21cf4	d__Bacteria; p__Bacteroidota; c__Bacteroidia; o__Bacteroidales
d061e61c9fd5e9217993b1ef4a1fd1a0	d__Bacteria; p__Bacteroidota; c__Bacteroidia; o__Bacteroidales; f__Bacteroidaceae; g__Bacteroides
64b44926461b0c07126f2f97e09e5c5e	d__Bacteria; p__Actinobacteriota; c__Actinobacteria; o__Micrococcales; f__Demequinaceae; g__Demequina
834c5c35692e02a058a0592f090e5587	d__Bacteria; p__Patescibacteria; c__CPR2; o__CPR2; f__CPR2; g__CPR2; s__uncultured_Clostridium
14ea7a0eb18e7bf4ccd080d888c85f87	d__Bacteria; p__Proteobacteria; c__Alphaproteobacteria; o__Rhizobiales; f__Xanthobacteraceae; g__Bradyrhizobium
89af59309386925bcf48d13fbc47f60e	d__Bacteria; p__Chloroflexi; c__KD4-96; o__KD4-96; f__KD4-96; g__KD4-96; s__uncultured_Chloroflexi
e64fe2baab262bd9ec5a51cab5a0195d	d__Bacteria; p__WPS-2; c__WPS-2; o__WPS-2; f__WPS-2; g__WPS-2; s__uncultured_bacterium
a46feef40b42517f8f4b52bb53210d3c	d__Bacteria; p__Proteobacteria; c__Gammaproteobacteria; o__Methylococcales; f__Methylomonadaceae
0290ff5cc8c721d5a69d2e949d8b3ae9	d__Bacteria; p__Bacteroidota; c__Bacteroidia; o__Bacteroidales; f__Paludibacteraceae
66ff40c56ec249a97ee9ccfbaba16026	d__Bacteria; p__Acidobacteriota; c__Acidobacteriae; o__Acidobacteriales; f__uncultured; g__uncultured
509ed80e02453da7ba74f221794a3fbc	d__Bacteria; p__Acidobacteriota; c__Acidobacteriae; o__Acidobacteriales; f__Acidobacteriaceae_(Subgroup_1); g__Occallatibacter
03a558fa7b339f495617bdc13486f514	d__Bacteria; p__Actinobacteriota; c__Thermoleophilia; o__Solirubrobacterales; f__Solirubrobacteraceae
ec29f4b8a06b92195ffd0a3390c7dacf	d__Archaea; p__Crenarchaeota; c__Nitrososphaeria; o__Group_1.1c; f__Group_1.1c; g__Group_1.1c; s__uncultured_crenarchaeote
c22c49cc41a035a722ce7bae1d525718	d__Bacteria; p__Actinobacteriota; c__Actinobacteria; o__Micrococcales; f__Intrasporangiaceae; g__Oryzihumus; s__uncultured_bacterium
21b6d7bfc001281f1603ee900e80e656	d__Bacteria; p__Acidobacteriota; c__Acidobacteriae; o__Acidobacteriales; f__Acidobacteriaceae_(Subgroup_1); g__Occallatibacter; s__bacterium_enrichment
1038ef39afeb4b3ec58fd2b8f4ce53c5	d__Bacteria; p__Bacteroidota; c__Bacteroidia; o__Bacteroidales; f__Prolixibacteraceae; g__BSV13; s__uncultured_Bacteroidetes
ac352e85983ae58e3ca6dea7abb909b4	d__Bacteria; p__WPS-2; c__WPS-2; o__WPS-2; f__WPS-2; g__WPS-2; s__metagenome
56e368bb72fcb2778433fd09a5be0818	d__Bacteria; p__Proteobacteria; c__Gammaproteobacteria; o__JG36-TzT-191; f__JG36-TzT-191; g__JG36-TzT-191; s__uncultured_gamma
26f467072570ce9ce7be1a3d08935c6f	d__Bacteria; p__Acidobacteriota; c__Acidobacteriae; o__Acidobacteriales; f__uncultured; g__uncultured
667309d3baf3a942590961d126601f8c	Unassigned
095cd4dd99d85a41b3c822ffe1d80d4c	d__Bacteria; p__Gemmatimonadota; c__Gemmatimonadetes; o__Gemmatimonadales; f__Gemmatimonadaceae; g__uncultured
0a512499c4f227732b0165731c262147	d__Bacteria; p__Spirochaetota; c__Spirochaetia; o__Spirochaetales; f__Spirochaetaceae; g__uncultured; s__uncultured_bacterium
60440bdf79c2d6963f94b52e40bd7dab	d__Bacteria; p__Chloroflexi; c__AD3; o__AD3; f__AD3; g__AD3
33dacac5fff858c2e140f155fd6f071b	d__Bacteria; p__Desulfobacterota; c__Syntrophia; o__Syntrophales; f__uncultured; g__uncultured; s__uncultured_bacterium
af4cf80bd0417bd08d17429bb284f65c	d__Eukaryota; p__Ciliophora; c__Intramacronucleata; o__Spirotrichea; f__Hypotrichia
a76a20f8d9aefdf493944eb421592c4d	d__Bacteria; p__Acidobacteriota; c__Acidobacteriae; o__Acidobacteriales; f__Acidobacteriaceae_(Subgroup_1); g__Occallatibacter
3ce9d92035d9551eceababd47a555416	d__Archaea; p__Crenarchaeota; c__Bathyarchaeia; o__Bathyarchaeia; f__Bathyarchaeia; g__Bathyarchaeia
ef094452ccca8fc08cc750c3ecffc202	d__Bacteria; p__Proteobacteria; c__Gammaproteobacteria; o__JG36-TzT-191; f__JG36-TzT-191; g__JG36-TzT-191; s__uncultured_bacterium
ce33b30e6560648b95335736ba1493a3	d__Bacteria; p__Proteobacteria; c__Gammaproteobacteria; o__Burkholderiales
aff3a6a456d41b5206b5a5e966eefd27	d__Bacteria; p__Acidobacteriota; c__Acidobacteriae; o__Acidobacteriales; f__uncultured; g__uncultured
f76abdbee125c3faf21599526837ff1b	d__Bacteria; p__Acidobacteriota; c__Acidobacteriae; o__Subgroup_2; f__Subgroup_2; g__Subgroup_2; s__uncultured_Acidobacteria
af3014e558a27620a56602483fe73fb5	d__Bacteria; p__Methylomirabilota; c__Methylomirabilia; o__Methylomirabilales; f__Methylomirabilaceae; g__Sh765B-TzT-35; s__uncultured_bacterium
f7146881676dba2218919c08851a0561	d__Bacteria; p__Cyanobacteria; c__Cyanobacteriia; o__Chloroplast; f__Chloroplast; g__Chloroplast; s__Carex_siderosticta
f67ab945d24a15d614a4c7b5dd9ac986	d__Bacteria; p__Proteobacteria; c__Gammaproteobacteria; o__Burkholderiales; f__Nitrosomonadaceae; g__GOUTA6
01229476fbfbda238602f94e45b2db7f	d__Bacteria; p__Proteobacteria; c__Alphaproteobacteria; o__Acetobacterales; f__Acetobacteraceae; g__Rhodovastum; s__metagenome
6f1aaafcd66a20174f92c160dcfc6930	d__Bacteria; p__Bacteroidota; c__Bacteroidia; o__Bacteroidales; f__Bacteroidetes_vadinHA17; g__Bacteroidetes_vadinHA17; s__uncultured_Bacteroidales
d002aaf2413861da8f0263582a70e36b	d__Bacteria; p__Patescibacteria; c__Microgenomatia; o__Candidatus_Roizmanbacteria; f__Candidatus_Roizmanbacteria; g__Candidatus_Roizmanbacteria; s__uncultured_bacterium
0a1e5b482b6d0f88005f170d7370c202	d__Bacteria; p__Proteobacteria; c__Gammaproteobacteria
8d4b4612a4914c63d354f58b6833077d	d__Bacteria; p__Planctomycetota; c__Phycisphaerae; o__Tepidisphaerales
f0d67dfca5cac2d168a6bc5226131948	d__Bacteria; p__Planctomycetota; c__Planctomycetes; o__Isosphaerales; f__Isosphaeraceae; g__Tundrisphaera
d00673175ea6996ffd2f8e946ed458f0	d__Bacteria; p__Proteobacteria; c__Gammaproteobacteria; o__Burkholderiales; f__Nitrosomonadaceae; g__GOUTA6; s__uncultured_bacterium
9274444458ad971971316790ae2fea2f	d__Bacteria; p__Patescibacteria; c__Parcubacteria; o__Parcubacteria; f__Parcubacteria; g__Parcubacteria; s__uncultured_bacterium
d129f03185f63a6f170d7bc381ff3273	d__Bacteria; p__Fibrobacterota; c__Fibrobacteria; o__Fibrobacterales; f__Fibrobacteraceae; g__uncultured; s__metagenome
d9604cd546ff1b1222e2e0fa156fb369	d__Bacteria; p__Acidobacteriota; c__Acidobacteriae; o__Acidobacteriales; f__Acidobacteriaceae_(Subgroup_1); g__Granulicella
51c4ccd634702c4c65651348094b29b8	d__Bacteria; p__Proteobacteria; c__Gammaproteobacteria; o__Burkholderiales; f__Comamonadaceae
45cd25683cd9aae30e487e4387e33815	d__Bacteria; p__Verrucomicrobiota; c__Verrucomicrobiae; o__Opitutales; f__Opitutaceae
338c574ff20eb20f9b8fad0cfc19a901	d__Bacteria; p__Proteobacteria; c__Alphaproteobacteria; o__Rhizobiales; f__Xanthobacteraceae; g__uncultured
d18436d0cc624e865bf05c9146fb2e45	d__Bacteria; p__Proteobacteria; c__Alphaproteobacteria; o__Rhizobiales; f__Beijerinckiaceae; g__Rhodoblastus; s__uncultured_bacterium
6f70a10a202338b488c232dc82cbc2f1	d__Bacteria; p__Acidobacteriota; c__Acidobacteriae
d1452a401981db4df49f8f35d35511ff	d__Bacteria; p__WPS-2; c__WPS-2; o__WPS-2; f__WPS-2; g__WPS-2; s__uncultured_bacterium
1bfe550b9f2345db9b37dc7f85a066c8	d__Eukaryota; p__Basidiomycota; c__Microbotryomycetes; o__Sporidiobolales; f__Sporidiobolaceae; g__Rhodotorula; s__Rhodotorula_glutinis
8e5fcf425eaf11d529d3af84f75c6f2e	d__Bacteria; p__Acidobacteriota; c__Acidobacteriae; o__Acidobacteriales; f__uncultured; g__uncultured; s__uncultured_bacterium
3853d5a277e464701ef705dc3f1a1670	d__Bacteria; p__Proteobacteria; c__Alphaproteobacteria; o__Rhizobiales; f__Xanthobacteraceae; g__Bradyrhizobium
b3a986c71490ee7536740e70c54594ae	d__Bacteria; p__Acidobacteriota; c__Acidobacteriae; o__Acidobacteriales; f__Acidobacteriaceae_(Subgroup_1); g__Granulicella
0f61b5231e6c11ad6c8302878367bcdf	d__Bacteria; p__Verrucomicrobiota; c__Verrucomicrobiae; o__Pedosphaerales; f__Pedosphaeraceae; g__uncultured
51b0e22ecad39f4ee3d3bb8729600412	d__Bacteria; p__Bacteroidota; c__Bacteroidia; o__Sphingobacteriales; f__Lentimicrobiaceae; g__Lentimicrobiaceae; s__uncultured_bacterium
46635514b84ebd900f489ac6d305d89a	d__Bacteria; p__Acidobacteriota; c__Vicinamibacteria; o__Vicinamibacterales; f__uncultured; g__uncultured
5b870af4955dedfd12c9e7796b2a1aff	d__Bacteria; p__Proteobacteria; c__Alphaproteobacteria; o__Acetobacterales; f__Acetobacteraceae; g__Rhodovastum; s__metagenome
f7dbd2bef244769d4c5e995e82fd1eaf	d__Bacteria; p__Armatimonadota; c__uncultured; o__uncultured; f__uncultured; g__uncultured; s__uncultured_bacterium
ca955eea0b78eeadfd8c3c064219e6ec	d__Bacteria; p__Chloroflexi; c__KD4-96; o__KD4-96; f__KD4-96; g__KD4-96; s__uncultured_Chloroflexi
7a2aa163e2bb3f847260f6e61adf07d9	d__Bacteria; p__Desulfobacterota; c__Desulfuromonadia; o__Geobacterales; f__Geobacteraceae; g__Geobacter
967684ea5af3dbc90c00a503bcbdeaf3	d__Bacteria; p__Chloroflexi; c__KD4-96; o__KD4-96; f__KD4-96; g__KD4-96; s__uncultured_Anaerolineaceae
4891636c640713ae191a4a3ed6c89184	d__Bacteria; p__Planctomycetota; c__Phycisphaerae; o__Tepidisphaerales; f__CPla-3_termite_group; g__CPla-3_termite_group; s__uncultured_bacterium
18750855dc925dad5b28fbd36c8516f0	d__Bacteria; p__Proteobacteria; c__Gammaproteobacteria; o__Burkholderiales; f__Comamonadaceae
1bf36fb4ac6163c1a1ba250cf62d8288	d__Bacteria; p__Proteobacteria; c__Gammaproteobacteria
9a663e703334ec0d91c3d321b0e1e849	d__Bacteria; p__Acidobacteriota; c__Acidobacteriae; o__Acidobacteriales; f__Acidobacteriaceae_(Subgroup_1); g__Occallatibacter
1d5a49ed595393c30df711e8b8bd26b5	d__Bacteria; p__Proteobacteria; c__Alphaproteobacteria; o__Rhizobiales; f__Beijerinckiaceae; g__Rhodoblastus
4772d0a79628fd2d8317d582680c0621	d__Eukaryota; p__Ciliophora; c__Intramacronucleata; o__Spirotrichea; f__Hypotrichia
c71cc28c9f91d26fdfe6136b7364d9f7	d__Archaea; p__Halobacterota; c__Methanomicrobia; o__Methanomicrobiales; f__Methanoregulaceae; g__Methanoregula; s__uncultured_archaeon
093d12180d79c16d1a6393629576fc5b	d__Bacteria; p__Proteobacteria; c__Gammaproteobacteria; o__Burkholderiales; f__Nitrosomonadaceae; g__GOUTA6
3acec76e8cd685b058c35262998e4e43	d__Bacteria; p__Acidobacteriota; c__Acidobacteriae; o__Solibacterales; f__Solibacteraceae; g__Candidatus_Solibacter
7d15601c9f308322b8b4281428265b0c	d__Bacteria; p__Proteobacteria; c__Gammaproteobacteria; o__Burkholderiales; f__Comamonadaceae
06785a13eadbd286cfd340103732126d	d__Bacteria; p__Bacteroidota; c__Bacteroidia; o__Sphingobacteriales; f__Lentimicrobiaceae; g__Lentimicrobiaceae; s__uncultured_bacterium
2a90169dc6781e02335dc7436c1c277c	d__Bacteria; p__Proteobacteria; c__Gammaproteobacteria; o__Burkholderiales; f__Comamonadaceae
c9c59a9cb8b6f5c5cc72b9ec76eb9881	d__Bacteria; p__Patescibacteria; c__CPR2; o__CPR2; f__CPR2; g__CPR2; s__uncultured_Clostridium
035eaa215ba998cbfeac64a7248c0ac1	d__Bacteria; p__Verrucomicrobiota; c__Verrucomicrobiae; o__Pedosphaerales; f__Pedosphaeraceae; g__Ellin516; s__uncultured_bacterium
928866e17419689da4ff66c040b6df9e	d__Bacteria; p__Chloroflexi; c__KD4-96; o__KD4-96; f__KD4-96; g__KD4-96; s__uncultured_Anaerolineaceae
5f217d0e0e1c386bddaff8312041d2f7	d__Bacteria; p__Acidobacteriota; c__Acidobacteriae; o__Subgroup_2; f__Subgroup_2; g__Subgroup_2; s__uncultured_forest
d3dd3ce727db5ce096c8cc2d12d726a4	d__Bacteria; p__Acidobacteriota; c__Acidobacteriae; o__Solibacterales; f__Solibacteraceae; g__Candidatus_Solibacter
a6576d4912ad2465596eebe899aa3efa	d__Bacteria; p__Acidobacteriota; c__Acidobacteriae; o__Acidobacteriales; f__Acidobacteriaceae_(Subgroup_1); g__Occallatibacter
b9d74f358678a1623c151dcc64b87d2b	d__Bacteria; p__Proteobacteria; c__Gammaproteobacteria; o__JG36-TzT-191; f__JG36-TzT-191; g__JG36-TzT-191; s__uncultured_gamma
baf569d8b05c16258efdac1205b4e12c	d__Bacteria; p__Planctomycetota; c__Phycisphaerae; o__DG-20; f__DG-20; g__DG-20; s__uncultured_bacterium
bb9342d3c28cb825228abd2bc15c1055	d__Bacteria; p__Planctomycetota; c__Phycisphaerae; o__Tepidisphaerales; f__WD2101_soil_group; g__WD2101_soil_group
03d4350f270e31698cd2971712a1d4de	d__Bacteria; p__Chloroflexi; c__Dehalococcoidia; o__RBG-13-46-9; f__RBG-13-46-9; g__RBG-13-46-9; s__uncultured_bacterium
1112b5b79a94ec350ce24584db305fc3	d__Bacteria; p__Actinobacteriota; c__Thermoleophilia; o__Gaiellales; f__uncultured; g__uncultured; s__uncultured_Solirubrobacterales
26224577f9392ffca2317dbc1a7b8676	d__Bacteria; p__Proteobacteria; c__Alphaproteobacteria; o__Acetobacterales; f__Acetobacteraceae; g__uncultured
822b70815d1c588f8c0b5afff2b128b3	d__Bacteria; p__Fibrobacterota; c__Fibrobacteria; o__Fibrobacterales; f__Fibrobacteraceae; g__uncultured; s__metagenome
d81e26bd0fcf181259dab54432c00404	d__Bacteria; p__Acidobacteriota; c__Acidobacteriae; o__Acidobacteriales; f__uncultured; g__uncultured; s__metagenome
ffdb61019c1855f7e8b71352eb60eef1	d__Bacteria; p__Acidobacteriota; c__Acidobacteriae; o__Acidobacteriales; f__Acidobacteriaceae_(Subgroup_1); g__Occallatibacter
1f938e144fd6b6bad94691394421e53b	d__Bacteria; p__Acidobacteriota; c__Acidobacteriae; o__Acidobacteriales; f__Acidobacteriaceae_(Subgroup_1); g__Occallatibacter
0be9ece673b0b29ff279f2c86e3f1faf	d__Bacteria; p__Bacteroidota; c__Bacteroidia; o__Bacteroidales; f__Prolixibacteraceae; g__WCHB1-32
043f20e5f73288bdd63d39aa61db23e8	d__Bacteria; p__Gemmatimonadota; c__Gemmatimonadetes; o__Gemmatimonadales; f__Gemmatimonadaceae; g__uncultured; s__uncultured_Gemmatimonadaceae
196fdcb8f677e7102f25685661fd1aea	d__Bacteria; p__Planctomycetota; c__Planctomycetes; o__Pirellulales; f__Pirellulaceae; g__Pir2_lineage
e814776c6a497d9f560397e278e90fb8	d__Bacteria; p__Acidobacteriota; c__Acidobacteriae; o__Subgroup_2; f__Subgroup_2; g__Subgroup_2; s__uncultured_forest
3a26129e626eca9f2d9f7dfa4bb02456	d__Bacteria; p__Actinobacteriota; c__Coriobacteriia; o__OPB41; f__OPB41; g__OPB41
73f2134b214a0d3abba0629181c6e544	d__Bacteria; p__Cyanobacteria; c__Cyanobacteriia; o__Chloroplast; f__Chloroplast; g__Chloroplast; s__Carex_siderosticta
772beb1f854cb0f52481fe2e4e2a26cf	d__Archaea; p__Halobacterota; c__Methanomicrobia; o__Methanomicrobiales; f__Methanoregulaceae; g__Methanoregula
a8bb9ad3c11f4b684e5a570ae5774de5	d__Bacteria; p__Proteobacteria; c__Alphaproteobacteria; o__Rhizobiales; f__Beijerinckiaceae; g__Rhodoblastus; s__uncultured_bacterium
c7d40eb1615071a06091a5b7459099c9	d__Bacteria; p__Acidobacteriota; c__Acidobacteriae; o__Acidobacteriales; f__uncultured; g__uncultured
4b3e405405468746c5e3f43b448ac9b2	d__Bacteria; p__Actinobacteriota; c__Acidimicrobiia; o__uncultured; f__uncultured; g__uncultured; s__uncultured_Actinomycetales
564a02b28fa2f7848a14016fb70d85e6	d__Bacteria; p__Firmicutes; c__Negativicutes; o__Veillonellales-Selenomonadales
633b71cdc3b07746e89f2caa88d2cef7	d__Bacteria; p__Acidobacteriota; c__Acidobacteriae; o__Acidobacteriales; f__uncultured; g__uncultured; s__uncultured_bacterium
3f2a1c62ff284d6c42846d70be879c53	d__Bacteria; p__Actinobacteriota; c__Actinobacteria; o__Micrococcales; f__Intrasporangiaceae; g__Oryzihumus; s__uncultured_bacterium
3b5589feb8879cc5ba6c6c385cf71963	d__Bacteria; p__Proteobacteria; c__Gammaproteobacteria; o__Burkholderiales; f__Comamonadaceae
8e670828c3a26e8c3c2b16ed90d5d044	d__Bacteria; p__Proteobacteria; c__Gammaproteobacteria; o__Burkholderiales; f__Comamonadaceae
c9d87580a006a78e535a347e51e32dae	d__Bacteria; p__Actinobacteriota; c__Thermoleophilia; o__Solirubrobacterales; f__Solirubrobacteraceae; g__Conexibacter
6b98d2f822d6c1cfa0b5b6d2ecf85aa4	d__Bacteria; p__Acidobacteriota; c__Acidobacteriae; o__Solibacterales; f__Solibacteraceae; g__Candidatus_Solibacter
1a270b8803a5c5babaa8354081278669	d__Bacteria; p__Acidobacteriota; c__Acidobacteriae; o__Acidobacteriales; f__Acidobacteriaceae_(Subgroup_1); g__Telmatobacter
19ac0c3978e1fd5aa6d7a9fda000b23f	d__Bacteria; p__Planctomycetota; c__Planctomycetes; o__Pirellulales; f__Pirellulaceae; g__uncultured
5282d3bdabec1e7fd258bdcd61813873	d__Bacteria; p__Proteobacteria; c__Gammaproteobacteria; o__Burkholderiales; f__Comamonadaceae
4f8dbf9937a3f15260c9493c62888053	d__Bacteria; p__Spirochaetota; c__Spirochaetia; o__Spirochaetales; f__Spirochaetaceae; g__uncultured; s__uncultured_bacterium
72c78ea4dfcb611bd9684d3f563f38c7	d__Bacteria; p__Acidobacteriota; c__Acidobacteriae; o__Acidobacteriales; f__Acidobacteriaceae_(Subgroup_1); g__Occallatibacter; s__bacterium_K-5b10
469e229cd7ee508bd3905b20080f0a98	d__Bacteria; p__Chloroflexi; c__AD3; o__AD3; f__AD3; g__AD3; s__uncultured_Thermomicrobia
74ca014d36c9dc0d8652b4323aadce78	d__Bacteria; p__Acidobacteriota; c__Acidobacteriae
30f3058a5eef968c001eaa1389272cc2	d__Bacteria; p__WPS-2; c__WPS-2; o__WPS-2; f__WPS-2; g__WPS-2; s__uncultured_bacterium
6bb09c10234f95311262aefaf3797d17	d__Bacteria; p__Proteobacteria; c__Alphaproteobacteria; o__Elsterales; f__uncultured; g__uncultured
2205a4341a4ef9d398b3177405bf754d	d__Bacteria; p__Planctomycetota; c__Planctomycetes; o__Pirellulales; f__Pirellulaceae; g__uncultured; s__uncultured_Planctomycetaceae
24b030e221e80bb8e51fcf7cb00173db	d__Bacteria; p__Acidobacteriota; c__Acidobacteriae; o__Subgroup_2; f__Subgroup_2; g__Subgroup_2; s__uncultured_Holophaga
83e5245cffb434183b3c9b3dbe699c92	d__Archaea; p__Crenarchaeota; c__Nitrososphaeria; o__Group_1.1c; f__Group_1.1c; g__Group_1.1c; s__uncultured_crenarchaeote
150786ab38a824d784f73bb2af67544e	d__Bacteria; p__Actinobacteriota; c__Acidimicrobiia; o__IMCC26256; f__IMCC26256; g__IMCC26256; s__uncultured_Acidimicrobiaceae
987449d805d62a59e4d39201ad6bbc0b	d__Bacteria; p__WPS-2; c__WPS-2; o__WPS-2; f__WPS-2; g__WPS-2; s__metagenome
da3e232fa07e1f88fec22ac9af2ca2fa	d__Bacteria; p__Acidobacteriota; c__Holophagae; o__Subgroup_7; f__Subgroup_7; g__Subgroup_7; s__uncultured_Thermaerobacter
7c53069057c211d04db29155090e0397	d__Bacteria; p__Bacteroidota; c__Bacteroidia; o__Bacteroidales; f__Paludibacteraceae; g__Paludibacter; s__uncultured_bacterium
fd86a6be6d90f92f8f7f6f8b6bca1107	d__Eukaryota; p__Ciliophora; c__Intramacronucleata; o__Spirotrichea; f__Hypotrichia; g__Oxytricha
4e6c886bf083bfc5d8a341d8ca2c6d36	d__Bacteria; p__Acidobacteriota; c__Acidobacteriae; o__Acidobacteriales; f__uncultured; g__uncultured
2322488eb6027b97b3885bbb8f5a1e8d	d__Bacteria; p__Acidobacteriota; c__Acidobacteriae; o__Solibacterales; f__Solibacteraceae; g__Candidatus_Solibacter
98c0b51a76366ebbde59b17b3acd4099	d__Bacteria; p__Verrucomicrobiota; c__Verrucomicrobiae; o__Pedosphaerales; f__Pedosphaeraceae; g__uncultured
9652a45e0b636049309861e266bf0008	d__Bacteria; p__Gemmatimonadota; c__Gemmatimonadetes; o__Gemmatimonadales; f__Gemmatimonadaceae; g__uncultured
3b02c3111f2f29297e4a92c8adfce6ef	d__Bacteria; p__Acidobacteriota; c__Acidobacteriae; o__Solibacterales; f__Solibacteraceae; g__Candidatus_Solibacter
1b3cde878c2c74d8a2a1f9de85e7e011	d__Bacteria; p__Firmicutes; c__Negativicutes; o__Veillonellales-Selenomonadales; f__uncultured; g__uncultured; s__uncultured_bacterium
49b959064d901d49a354a4124861f11c	d__Bacteria; p__Proteobacteria; c__Gammaproteobacteria; o__Chromatiales; f__Chromatiaceae; g__uncultured
67f88176f6e6d8d4dd652e3e2afaa909	d__Bacteria; p__Acidobacteriota; c__Acidobacteriae; o__GOUTB8; f__GOUTB8; g__GOUTB8; s__uncultured_bacterium
e590137bc1cdcd1c4593d46ea510c0f6	d__Bacteria; p__Actinobacteriota; c__Actinobacteria
3a81aaa773d78b3eff849146a5a954fb	d__Bacteria; p__Acidobacteriota; c__Acidobacteriae
f577500b6b7cd6c14318646c3c79558d	d__Bacteria; p__Actinobacteriota; c__Acidimicrobiia; o__uncultured; f__uncultured; g__uncultured
3547c186df12f82e89df939598338fc5	d__Eukaryota; p__Basidiomycota; c__Agaricomycetes; o__uncultured; f__uncultured; g__uncultured; s__uncultured_Boletaceae
a8cd184c68e56d8c029824704cf897fa	d__Bacteria; p__Gemmatimonadota; c__Gemmatimonadetes; o__Gemmatimonadales; f__Gemmatimonadaceae; g__Gemmatimonas; s__uncultured_bacterium
d6f76876f90cb6ef6ac08e3bb2647ea9	d__Bacteria; p__Actinobacteriota; c__Thermoleophilia; o__Solirubrobacterales; f__Solirubrobacteraceae
41485f4d64816fd178984acdf5b43177	d__Bacteria; p__Proteobacteria; c__Gammaproteobacteria; o__Burkholderiales; f__Comamonadaceae
2b2b8fbbc93cdf7dc93ac4ce8095fef7	d__Bacteria; p__Desulfobacterota; c__Syntrophia; o__Syntrophales; f__Smithellaceae; g__Smithella; s__uncultured_bacterium
343d65e43971889524bca504d34d886b	d__Bacteria; p__Proteobacteria; c__Alphaproteobacteria; o__Rhizobiales; f__Xanthobacteraceae; g__Bradyrhizobium
722de6ffb042a51b7aaf36c81e646c66	d__Bacteria; p__Bacteroidota; c__Bacteroidia; o__Bacteroidales; f__Prolixibacteraceae; g__WCHB1-32
63d874972c36b80f4db0f1e47e522015	d__Bacteria; p__Acidobacteriota; c__Acidobacteriae; o__Acidobacteriales; f__uncultured; g__uncultured
4973b97b5a9c47aae37c181b20a95bc2	d__Bacteria; p__Verrucomicrobiota; c__Verrucomicrobiae; o__Pedosphaerales; f__Pedosphaeraceae; g__Ellin516; s__uncultured_bacterium
551d0d88229aebd5f7a6e09e60696ef8	d__Bacteria; p__Proteobacteria; c__Alphaproteobacteria; o__Acetobacterales; f__Acetobacteraceae; g__uncultured; s__uncultured_bacterium
0429e7a1d7964744d2c4b607f03f2d36	d__Bacteria; p__Actinobacteriota; c__Thermoleophilia; o__Gaiellales; f__uncultured; g__uncultured; s__uncultured_Solirubrobacterales
67e39671958b6bf49018c09305dd95bb	d__Bacteria; p__Acidobacteriota; c__Acidobacteriae; o__Acidobacteriales; f__Acidobacteriaceae_(Subgroup_1); g__Granulicella
381f9b9c168ef56ac78530ab28ce161f	d__Bacteria; p__Actinobacteriota; c__Acidimicrobiia; o__IMCC26256; f__IMCC26256; g__IMCC26256
484f10d5046559937bb0f119f0e17e48	d__Bacteria; p__Proteobacteria; c__Alphaproteobacteria; o__Acetobacterales; f__Acetobacteraceae
d336e68434df1cea6147a735158296ec	d__Bacteria; p__Actinobacteriota; c__Thermoleophilia; o__Solirubrobacterales; f__Solirubrobacteraceae
7b67072fa5c4e79daa5c7ea0a0ddac36	d__Archaea; p__Crenarchaeota; c__Nitrososphaeria; o__Group_1.1c; f__Group_1.1c; g__Group_1.1c
cad983e1572a44e6b97f10a5ad4ee682	d__Bacteria; p__Acidobacteriota; c__Acidobacteriae; o__Acidobacteriales; f__Acidobacteriaceae_(Subgroup_1); g__uncultured
b668f84489f2dac7cf5c1f0bc5badad5	d__Bacteria; p__Planctomycetota; c__Planctomycetes; o__Isosphaerales; f__Isosphaeraceae; g__Aquisphaera; s__uncultured_bacterium
cdf1f8daf2117960a73990acd507d7e2	d__Bacteria; p__Actinobacteriota; c__Thermoleophilia; o__Gaiellales; f__uncultured; g__uncultured; s__uncultured_Solirubrobacterales
e1aa296f267da3344a2bad141e0d1664	d__Bacteria; p__Proteobacteria; c__Alphaproteobacteria; o__Rhizobiales; f__Xanthobacteraceae; g__Bradyrhizobium
e3157fc13be5d89a5503ab4f9bba7684	d__Bacteria; p__Acidobacteriota; c__Acidobacteriae; o__Acidobacteriales; f__Acidobacteriaceae_(Subgroup_1); g__Occallatibacter; s__bacterium_enrichment
6ed5577b996c4202b9102e539b131f01	d__Bacteria; p__Acidobacteriota; c__Acidobacteriae; o__Acidobacteriales; f__uncultured; g__uncultured
5b5104b2ec5520845dc1049c971351f1	d__Bacteria; p__Proteobacteria; c__Gammaproteobacteria; o__Burkholderiales; f__Comamonadaceae
47b845a6a2d7a59f0b08140e21e619bf	d__Bacteria; p__Chloroflexi; c__AD3; o__AD3; f__AD3; g__AD3
07e3bf7b733f91b6ba9f48e834f20eab	d__Bacteria; p__Verrucomicrobiota; c__Verrucomicrobiae; o__Opitutales; f__Opitutaceae; g__Lacunisphaera; s__metagenome
1ae4aac62de28d586b55c9e1ce14353d	d__Bacteria; p__Bacteroidota; c__Bacteroidia; o__Bacteroidales; f__Dysgonomonadaceae; g__uncultured; s__uncultured_soil
1314a18b7ab90c1fda6131c4bb5354e8	d__Bacteria; p__Acidobacteriota; c__Acidobacteriae; o__Subgroup_2; f__Subgroup_2; g__Subgroup_2; s__uncultured_Acidobacteria
e169c15d1b1df953899f902609fe741e	d__Bacteria; p__Actinobacteriota; c__Acidimicrobiia; o__IMCC26256; f__IMCC26256; g__IMCC26256; s__Aciditerrimonas_sp.
d6bb9217d80732dcfe1831eded76cb0d	d__Bacteria; p__Planctomycetota; c__Planctomycetes; o__Pirellulales; f__Pirellulaceae
af8e73d89a75c9baf6916468b3c82b6d	d__Bacteria; p__Chloroflexi; c__KD4-96; o__KD4-96; f__KD4-96; g__KD4-96; s__uncultured_Chloroflexi
92fef6164a651960336962a48b39d645	d__Archaea; p__Crenarchaeota; c__Nitrososphaeria; o__Group_1.1c; f__Group_1.1c; g__Group_1.1c; s__uncultured_crenarchaeote
bd39f5801fbe921c6c87e1c9d1c17e25	d__Bacteria; p__Proteobacteria; c__Alphaproteobacteria; o__Rhizobiales; f__Xanthobacteraceae; g__Bradyrhizobium
85eb4e55e89cbc6cce5c9e767138fbea	d__Bacteria; p__Proteobacteria; c__Alphaproteobacteria; o__Rhizobiales; f__Beijerinckiaceae; g__Roseiarcus; s__uncultured_bacterium
ac2ed48cb15a3808edb3dc2d49c74b93	d__Bacteria; p__Bacteroidota; c__Ignavibacteria; o__Ignavibacteriales
84c0435ab076dc33cc5a4daabb4a8680	d__Bacteria; p__Proteobacteria; c__Alphaproteobacteria; o__Rhizobiales; f__Beijerinckiaceae; g__Rhodoblastus
3466bf703b0dcb0957033ae73d355b85	d__Bacteria; p__Acidobacteriota; c__Acidobacteriae; o__Acidobacteriales; f__Acidobacteriaceae_(Subgroup_1); g__Occallatibacter
92b6f495982ee29f4893dad00e78899d	d__Bacteria; p__Cyanobacteria; c__Cyanobacteriia; o__Chloroplast; f__Chloroplast; g__Chloroplast; s__Sphagnum_angustifolium
88a0f5f22147993086d6df0f3b1cd21b	d__Bacteria; p__Desulfobacterota; c__Desulfuromonadia; o__Geobacterales; f__Geobacteraceae; g__Trichlorobacter
addc02aad142359e676e1876d097e037	d__Bacteria; p__Bacteroidota; c__Bacteroidia; o__Bacteroidales; f__Prolixibacteraceae; g__Roseimarinus; s__uncultured_bacterium
55c680189ae4b17387b0bc0b34849f33	d__Bacteria; p__Proteobacteria; c__Gammaproteobacteria; o__Enterobacterales; f__Pectobacteriaceae; g__uncultured; s__Yersinia_sp.
acd73abe54251e1b6464e01b01779387	d__Bacteria; p__Proteobacteria; c__Gammaproteobacteria; o__Methylococcales; f__Methylomonadaceae
d8ad9bf311476ff6a5bc7d64edb68608	d__Bacteria; p__Acidobacteriota; c__Holophagae; o__Holophagales; f__Holophagaceae
481be2316b6f81f6ba7f3b934cabe8ee	d__Bacteria; p__Actinobacteriota; c__Actinobacteria; o__Corynebacteriales; f__Mycobacteriaceae; g__Mycobacterium
9493ac8e238a7534881dacf21a4f4255	d__Bacteria; p__Bacteroidota; c__Bacteroidia; o__Bacteroidales; f__Prolixibacteraceae; g__BSV13; s__uncultured_Bacteroidetes
ec714069a9b5f3029543bc85a7c22922	d__Bacteria; p__Acidobacteriota; c__Acidobacteriae; o__Acidobacteriae; f__Acidobacteriae; g__Paludibaculum; s__uncultured_Acidobacteria
bc2a39aebfd20451f7364b4dab19bc16	d__Bacteria; p__Planctomycetota; c__Planctomycetes; o__Pirellulales; f__Pirellulaceae; g__uncultured
77a9e6537b0e60fa39a7919c606c332d	d__Archaea; p__Crenarchaeota; c__Bathyarchaeia; o__Bathyarchaeia; f__Bathyarchaeia; g__Bathyarchaeia
dbda86b5b3c7b593a4ee079e74923e0b	d__Bacteria; p__Verrucomicrobiota; c__Verrucomicrobiae; o__Pedosphaerales; f__Pedosphaeraceae; g__Ellin516
6c39658c60fa2f2f2078896c14987f1a	d__Bacteria; p__Acidobacteriota; c__Acidobacteriae; o__Acidobacteriales; f__Acidobacteriaceae_(Subgroup_1)
00019e84e481ef7fd3b34d3dcf76245e	d__Bacteria; p__Chloroflexi; c__Dehalococcoidia; o__vadinBA26; f__vadinBA26; g__vadinBA26
2158e9a9aba061087c5c79af2f12adb0	d__Bacteria; p__Acidobacteriota; c__Holophagae; o__Subgroup_7; f__Subgroup_7; g__Subgroup_7; s__uncultured_Thermaerobacter
6ee7a59818dd3b6605f87eb75212d4b2	d__Bacteria; p__Actinobacteriota; c__Thermoleophilia; o__Solirubrobacterales; f__Solirubrobacteraceae; g__Conexibacter
618e361df688b7d9f8521948607d7993	d__Bacteria; p__Planctomycetota; c__Planctomycetes; o__Pirellulales; f__Pirellulaceae
ea814f6b2d4062dad468da47e4969748	d__Bacteria; p__Bacteroidota; c__Bacteroidia; o__Bacteroidales; f__Bacteroidetes_vadinHA17; g__Bacteroidetes_vadinHA17; s__uncultured_Bacteroidales
d493d09c48ca7efe30e039896fd929d2	d__Bacteria; p__Patescibacteria; c__Saccharimonadia; o__Saccharimonadales; f__Saccharimonadales; g__Saccharimonadales; s__uncultured_bacterium
044053d713bbfef84308de11cf93ab6a	d__Bacteria; p__Proteobacteria; c__Gammaproteobacteria; o__Burkholderiales; f__Comamonadaceae
37f8a6431fa5e439b8f376b9902091d2	d__Bacteria; p__Gemmatimonadota; c__Gemmatimonadetes; o__Gemmatimonadales; f__Gemmatimonadaceae; g__uncultured; s__uncultured_Gemmatimonadaceae
bd3fa918b12e60fd98e76dba62065df7	d__Bacteria; p__Acidobacteriota; c__Acidobacteriae; o__Subgroup_2; f__Subgroup_2; g__Subgroup_2; s__uncultured_Acidobacteria
70a399811e3454e38a26dde61a33627c	d__Bacteria; p__Patescibacteria; c__Microgenomatia; o__Candidatus_Roizmanbacteria; f__Candidatus_Roizmanbacteria; g__Candidatus_Roizmanbacteria; s__uncultured_bacterium
7d05b213229603ec1b1bf8198b26d724	d__Bacteria; p__Proteobacteria; c__Gammaproteobacteria; o__Burkholderiales; f__Comamonadaceae; g__Acidovorax
9be6906321ba2fc7b91d416187cb8230	d__Bacteria; p__Fibrobacterota; c__Fibrobacteria; o__Fibrobacterales; f__Fibrobacteraceae; g__uncultured; s__metagenome
1d4a8a49f44f76db0afe00d8e1034269	d__Eukaryota; p__Phragmoplastophyta; c__Embryophyta
31337673da5ee2917d5ad3464425cd3f	d__Bacteria; p__Fibrobacterota; c__Fibrobacteria; o__Fibrobacterales; f__B122; g__B122; s__uncultured_bacterium
549215715deee8bd9ed61d194ef0030f	d__Bacteria; p__Acidobacteriota; c__Acidobacteriae; o__Acidobacteriales; f__uncultured; g__uncultured
39f6cf259477eef9a77a159eb15427cc	d__Bacteria; p__Actinobacteriota; c__Actinobacteria; o__Frankiales; f__Acidothermaceae; g__Acidothermus
2c9d5c3900c1fa871236acd6b23d45dd	d__Bacteria; p__Desulfobacterota; c__Desulfuromonadia; o__Geobacterales; f__Geobacteraceae; g__Geobacter
b47d89be2dd4b4fcfa690fdb5ce3ca01	d__Bacteria; p__Proteobacteria; c__Gammaproteobacteria; o__Burkholderiales; f__Chromobacteriaceae; g__Paludibacterium
5ebd1c76cacf183aeeef0be8aafdfee6	d__Bacteria; p__Proteobacteria; c__Gammaproteobacteria; o__Burkholderiales; f__Comamonadaceae
e8f3c61770b56b2c009c07835c1b4b8f	d__Bacteria; p__Bacteroidota; c__Bacteroidia; o__Sphingobacteriales; f__Lentimicrobiaceae; g__Lentimicrobiaceae; s__uncultured_bacterium
b91f121d51d7bed990267cc5d9987de5	d__Bacteria; p__Actinobacteriota; c__Actinobacteria; o__Frankiales; f__Acidothermaceae; g__Acidothermus; s__uncultured_bacterium
1c95dd07ad7e3ef0748e76d17ada5186	d__Bacteria; p__Acidobacteriota; c__Acidobacteriae; o__Acidobacteriae; f__Acidobacteriae; g__Paludibaculum; s__uncultured_Acidobacteria
96af8587a4018204b24e2f54a44f79a0	d__Bacteria; p__Planctomycetota; c__Phycisphaerae; o__Tepidisphaerales; f__WD2101_soil_group; g__WD2101_soil_group; s__uncultured_soil
1eb88cf22671be4c4f25b85a09f648a8	d__Bacteria; p__Acidobacteriota; c__Acidobacteriae; o__Bryobacterales; f__Bryobacteraceae; g__Bryobacter; s__uncultured_soil
b6617bafa5ffbb09264b22c5cb8be382	d__Bacteria; p__Acidobacteriota; c__Vicinamibacteria; o__Vicinamibacterales; f__uncultured; g__uncultured
1c6a3711d0108897f3b38396c9d80811	d__Bacteria; p__Actinobacteriota; c__Acidimicrobiia; o__IMCC26256; f__IMCC26256; g__IMCC26256; s__uncultured_Acidimicrobiaceae
1149aeed6ba00b4a26d0ba2aebc36238	d__Archaea; p__Halobacterota; c__Methanomicrobia; o__Methanomicrobiales; f__Methanoregulaceae; g__Methanoregula
39415e7fe820af6a4e5a12a74454a2c2	d__Bacteria; p__Verrucomicrobiota; c__Verrucomicrobiae; o__Pedosphaerales; f__Pedosphaeraceae; g__Ellin516; s__uncultured_bacterium
1f4bd2084338157a3342bb1f1d45471a	Unassigned
1b05d29b839bbc79e78dbad57a561761	d__Bacteria; p__Proteobacteria; c__Gammaproteobacteria; o__Chromatiales; f__Chromatiaceae; g__Allochromatium; s__Allochromatium_vinosum
12c0f272b004ebf159718af0ab2725b3	d__Bacteria; p__Actinobacteriota; c__Acidimicrobiia; o__IMCC26256; f__IMCC26256; g__IMCC26256; s__Aciditerrimonas_sp.
6361e7b8bac7023041aca1480f3e90ab	d__Bacteria; p__Chloroflexi; c__KD4-96; o__KD4-96; f__KD4-96; g__KD4-96; s__uncultured_Chloroflexi
6cc32760d7fd152a9ffe86aee5631a87	d__Bacteria; p__Proteobacteria; c__Gammaproteobacteria; o__WD260; f__WD260; g__WD260; s__uncultured_bacterium
87d2ac60811008990e12cc648fe69a6e	d__Bacteria; p__Proteobacteria; c__Gammaproteobacteria; o__Burkholderiales; f__Chromobacteriaceae; g__Paludibacterium
a82a039795c7b259f6ab10ad5f890487	d__Bacteria; p__Patescibacteria; c__Microgenomatia; o__Candidatus_Gottesmanbacteria; f__Candidatus_Gottesmanbacteria; g__Candidatus_Gottesmanbacteria
3278e277ac1fe0131d10ea39acc89877	d__Bacteria; p__Myxococcota; c__Polyangia; o__Haliangiales; f__Haliangiaceae; g__Haliangium; s__uncultured_proteobacterium
ab28e5a7ce3bd92a1343f910b0a2fc17	d__Bacteria; p__Verrucomicrobiota; c__Verrucomicrobiae; o__Pedosphaerales; f__Pedosphaeraceae; g__uncultured
ddcd9886b90aaf149dd73d54bf7a3aa2	d__Bacteria; p__Patescibacteria; c__Microgenomatia; o__Candidatus_Gottesmanbacteria; f__Candidatus_Gottesmanbacteria; g__Candidatus_Gottesmanbacteria
bd675bb02e34e8052c8b5606ec840093	d__Bacteria; p__Acidobacteriota; c__Acidobacteriae; o__Acidobacteriales; f__Acidobacteriaceae_(Subgroup_1); g__Occallatibacter; s__uncultured_forest
6362ba34e3de7f3a71c32dfbe838208d	d__Bacteria; p__Planctomycetota; c__Planctomycetes; o__Pirellulales; f__Pirellulaceae
37f736af7a84f69ed9539d3dfa902538	d__Bacteria; p__Patescibacteria; c__Microgenomatia; o__Candidatus_Woesebacteria; f__Candidatus_Woesebacteria; g__Candidatus_Woesebacteria
233c8ba732f2aa862a77f9ff97d37bae	d__Archaea; p__Halobacterota; c__Methanomicrobia; o__Methanomicrobiales; f__Methanoregulaceae; g__Methanoregula; s__uncultured_archaeon
e91f0aea9364f6536fb0ebcc4fec4445	d__Bacteria; p__Bacteroidota; c__Bacteroidia; o__Bacteroidales; f__Prolixibacteraceae; g__BSV13; s__uncultured_bacterium
05732e0471d276fae2f262297897d2c6	Unassigned
f371656ef678de84a8ddb94e49765365	d__Bacteria; p__Actinobacteriota; c__Thermoleophilia; o__Solirubrobacterales; f__Solirubrobacteraceae; g__uncultured; s__uncultured_bacterium
9454ed4ea7cf3ff77b5e95b15c61d0c1	d__Bacteria; p__Firmicutes; c__Clostridia; o__Oscillospirales; f__Ruminococcaceae
d79264242c606adbeb04db7f1246eb13	d__Bacteria; p__Acidobacteriota; c__Acidobacteriae; o__Acidobacteriales; f__Acidobacteriaceae_(Subgroup_1); g__Occallatibacter
30ace18cba2158d858eb2a33f4b1085b	d__Bacteria; p__Bacteroidota; c__Bacteroidia; o__Bacteroidales; f__Prolixibacteraceae; g__BSV13
09b2ee7e837ebde6c2f934e923183898	d__Bacteria; p__Acidobacteriota; c__Vicinamibacteria; o__Vicinamibacterales; f__uncultured; g__uncultured
381e584560053b8bbb69fb4bffb8a510	d__Archaea; p__Crenarchaeota; c__Bathyarchaeia; o__Bathyarchaeia; f__Bathyarchaeia; g__Bathyarchaeia
91ea151391eb59c33c73852a65e79ac2	d__Bacteria; p__Acidobacteriota; c__Acidobacteriae; o__Acidobacteriales; f__Acidobacteriaceae_(Subgroup_1); g__Occallatibacter
530722c326ce438678cd293a88c94b31	d__Bacteria; p__Firmicutes; c__Clostridia; o__Oscillospirales; f__Ruminococcaceae
96e966314a73b89452a53d3b1791fe87	d__Bacteria; p__Proteobacteria; c__Alphaproteobacteria; o__Rhizobiales; f__Xanthobacteraceae; g__Bradyrhizobium
13085cddad99f64dc8f82725f351adef	d__Bacteria; p__Gemmatimonadota; c__Gemmatimonadetes; o__Gemmatimonadales; f__Gemmatimonadaceae; g__Gemmatimonas; s__uncultured_bacterium
00c3762d7c01145e3133a8aeae75a989	d__Bacteria; p__Verrucomicrobiota; c__Verrucomicrobiae; o__Pedosphaerales; f__Pedosphaeraceae; g__Ellin516; s__uncultured_bacterium
98c018f0d8a78dde0fd073d572110516	d__Bacteria; p__Firmicutes; c__Clostridia; o__Oscillospirales; f__[Eubacterium]_coprostanoligenes_group; g__[Eubacterium]_coprostanoligenes_group
c8391739082b9cae69513d7bdec3e9d0	d__Bacteria; p__Chloroflexi; c__Anaerolineae; o__Anaerolineales; f__Anaerolineaceae; g__Leptolinea; s__uncultured_eubacterium
585206ea45d5ef9c32fdf81c95b04414	d__Bacteria; p__Chloroflexi; c__AD3; o__AD3; f__AD3; g__AD3; s__uncultured_Thermoflavimicrobium
ee0d07cba433df990df8555143914541	d__Bacteria; p__Acidobacteriota; c__Acidobacteriae; o__Acidobacteriales; f__uncultured; g__uncultured; s__metagenome
44534a2ba371653024218b351c6d65d5	d__Bacteria; p__Actinobacteriota; c__Actinobacteria; o__Frankiales; f__Acidothermaceae; g__Acidothermus; s__uncultured_bacterium
e3b514b0effc0b3ef9bcd9b8f235e435	d__Bacteria; p__Proteobacteria; c__Gammaproteobacteria; o__Burkholderiales; f__Oxalobacteraceae; g__uncultured
971d3d71585eccffd6da92ebd4a39083	d__Bacteria; p__Actinobacteriota; c__Actinobacteria; o__Frankiales; f__Acidothermaceae; g__Acidothermus; s__uncultured_Actinomycetales
47ea16f62210554938e4a222e88f8094	d__Bacteria; p__Actinobacteriota; c__Thermoleophilia; o__Solirubrobacterales; f__Solirubrobacteraceae; g__Conexibacter
5689bf009fef4302d2722bcc60ac99f3	d__Bacteria; p__Acidobacteriota; c__Vicinamibacteria; o__Vicinamibacterales; f__uncultured; g__uncultured
1c9891eaf6f72fa396cf287e66e5dbed	d__Bacteria; p__Acidobacteriota; c__Acidobacteriae; o__Acidobacteriales; f__Acidobacteriaceae_(Subgroup_1); g__Occallatibacter; s__bacterium_K-5b10
f298fdb13974dd681b1059e03323e773	d__Bacteria; p__Acidobacteriota; c__Acidobacteriae; o__Acidobacteriales; f__Acidobacteriaceae_(Subgroup_1); g__Occallatibacter; s__uncultured_forest
1198f55bedbc0a36d713eeea43e08df4	d__Bacteria; p__Bacteroidota; c__Bacteroidia; o__Bacteroidales; f__Prolixibacteraceae; g__WCHB1-32; s__uncultured_Prolixibacter
a8ca2005889fdbc503eae918e4dfb897	d__Bacteria; p__Acidobacteriota; c__Acidobacteriae; o__Acidobacteriales; f__Acidobacteriaceae_(Subgroup_1)
8283d278eb8fba1fcf36d6c34774dfa0	d__Bacteria; p__Proteobacteria; c__Gammaproteobacteria; o__Enterobacterales; f__Pectobacteriaceae; g__uncultured; s__Yersinia_sp.
b07666254e4c8625e5693e4ea2869fb5	d__Bacteria; p__Armatimonadota
7b776bca7f870aa077abb38a77ff8ed9	d__Bacteria; p__Myxococcota; c__Polyangia; o__Haliangiales; f__Haliangiaceae; g__Haliangium; s__uncultured_proteobacterium
79e6cd3377ad0c60914bd9a0cdb94812	d__Archaea; p__Euryarchaeota; c__Methanobacteria; o__Methanobacteriales; f__Methanobacteriaceae; g__Methanobacterium
42eb294b7f08ecac532260d8c8a66611	d__Eukaryota; p__Ascomycota; c__Leotiomycetes; o__Thelebolales; f__Thelebolaceae
c45a3799b7ae0d3fe4f2bbe7942dea19	d__Bacteria; p__Verrucomicrobiota; c__Verrucomicrobiae; o__Pedosphaerales; f__Pedosphaeraceae; g__uncultured
83213936f1d3a89a3a37538cc3641e68	d__Bacteria; p__Actinobacteriota; c__Coriobacteriia; o__OPB41; f__OPB41; g__OPB41
9d595936051bafc0a0f781d2a9982671	d__Bacteria; p__Proteobacteria; c__Alphaproteobacteria; o__Rhizobiales; f__Beijerinckiaceae; g__Rhodoblastus; s__uncultured_bacterium
5c00563c978d354d3fdcf5f1c55f2bb3	d__Bacteria; p__Verrucomicrobiota; c__Verrucomicrobiae; o__Opitutales; f__Opitutaceae; g__Lacunisphaera; s__metagenome
bf9f1a66fc045a9d4995f40dae7b447c	d__Bacteria; p__Actinobacteriota; c__Thermoleophilia; o__Solirubrobacterales; f__Solirubrobacteraceae; g__uncultured; s__uncultured_bacterium
3b1a641abf70841961d073d9684fa9a1	d__Bacteria; p__Planctomycetota; c__Phycisphaerae; o__Tepidisphaerales
a00203612d4c68351dac0b7e7f8bfde3	d__Bacteria; p__Acidobacteriota; c__Acidobacteriae; o__Subgroup_2; f__Subgroup_2; g__Subgroup_2; s__uncultured_forest
3c0b627aa745f76ee25f2a3dbdbcd14a	d__Bacteria; p__Proteobacteria; c__Gammaproteobacteria; o__Burkholderiales; f__Gallionellaceae; g__Sideroxydans
d24947b412e77f1bfefbb48f04bb878a	d__Bacteria; p__Planctomycetota; c__Phycisphaerae; o__Tepidisphaerales; f__WD2101_soil_group; g__WD2101_soil_group
d790df557301413b71cb5f4f7952755e	d__Bacteria; p__Bacteroidota; c__Bacteroidia; o__Bacteroidales; f__Prolixibacteraceae; g__BSV13; s__uncultured_Bacteroidetes
d721b73a68306a2b1bc4716a7682efea	d__Bacteria; p__Patescibacteria; c__Parcubacteria; o__Candidatus_Staskawiczbacteria; f__Candidatus_Staskawiczbacteria; g__Candidatus_Staskawiczbacteria; s__uncultured_bacterium
ee7131f7dfbed6269cf3241aec87ac6e	d__Bacteria; p__Planctomycetota; c__Planctomycetes; o__Pirellulales; f__Pirellulaceae; g__uncultured
f36622147c5451660d15163a63c6604f	d__Bacteria; p__Proteobacteria; c__Alphaproteobacteria; o__Acetobacterales; f__Acetobacteraceae; g__uncultured; s__uncultured_bacterium
6d2f819e8c41c37a8bf711519951b593	d__Bacteria; p__Chloroflexi; c__KD4-96; o__KD4-96; f__KD4-96; g__KD4-96
4d971d456052efea880f00ae21932f64	d__Bacteria; p__Planctomycetota; c__Phycisphaerae; o__Tepidisphaerales; f__WD2101_soil_group; g__WD2101_soil_group
fea3890951e28afed7361ee93aa57e17	d__Bacteria; p__Actinobacteriota; c__Thermoleophilia; o__Solirubrobacterales; f__Solirubrobacteraceae; g__Conexibacter
699e79d28a666c37ab14089525db32b7	d__Bacteria; p__Patescibacteria; c__Saccharimonadia; o__Saccharimonadales; f__Saccharimonadales; g__Saccharimonadales; s__uncultured_bacterium
39e60ab471c8828a7f2ceca69c3943e3	d__Bacteria; p__Proteobacteria; c__Alphaproteobacteria; o__Caulobacterales; f__Caulobacteraceae
378d48977d9f5a97264208172258cd32	d__Bacteria; p__Patescibacteria; c__Microgenomatia; o__Candidatus_Shapirobacteria; f__Candidatus_Shapirobacteria; g__Candidatus_Shapirobacteria; s__metagenome
037b846dc4439664449a283353b62701	d__Bacteria; p__Actinobacteriota; c__Acidimicrobiia; o__IMCC26256; f__IMCC26256; g__IMCC26256; s__Aciditerrimonas_sp.
0c692f10224956f71bae2281e05bf373	d__Bacteria; p__Verrucomicrobiota; c__Verrucomicrobiae; o__Opitutales; f__Opitutaceae
7a81a9018e4dd0904e935bcd13c54cf9	d__Bacteria; p__Acidobacteriota; c__Holophagae; o__Subgroup_7; f__Subgroup_7; g__Subgroup_7; s__uncultured_Thermaerobacter
17c9d1bab822652beb16f27c178cd1b9	d__Bacteria; p__Acidobacteriota; c__Acidobacteriae
f35bab2b9e14b09c9b1ec1052067e917	d__Bacteria; p__Proteobacteria; c__Gammaproteobacteria; o__JG36-TzT-191; f__JG36-TzT-191; g__JG36-TzT-191; s__uncultured_bacterium
27fba01a067936e2d47ad3fb3e9be86d	d__Bacteria; p__Actinobacteriota; c__Thermoleophilia; o__Solirubrobacterales; f__Solirubrobacteraceae; g__uncultured
e5eaf50bce863fa51e5909324a2472fa	d__Bacteria; p__Patescibacteria; c__Parcubacteria; o__Parcubacteria; f__Parcubacteria; g__Parcubacteria; s__uncultured_bacterium
8d01e55c8a8c0563237424c60f098d70	d__Bacteria; p__Actinobacteriota; c__Acidimicrobiia; o__uncultured; f__uncultured; g__uncultured; s__uncultured_Actinomycetales
688c1300707575ff70d65a3bb3b3544e	d__Bacteria; p__Bacteroidota; c__Bacteroidia; o__Bacteroidales; f__Prolixibacteraceae; g__BSV13; s__uncultured_bacterium
bbc697f7f3b33b3de252befd88d6045b	d__Bacteria; p__Proteobacteria; c__Gammaproteobacteria; o__Burkholderiales; f__Nitrosomonadaceae; g__Ellin6067; s__uncultured_beta
cb80c121149f3dc761ac8742fe130c7f	d__Bacteria; p__Patescibacteria; c__Microgenomatia; o__Candidatus_Levybacteria; f__Candidatus_Levybacteria; g__Candidatus_Levybacteria; s__uncultured_bacterium
16bb275a74465a4a283ac292d4858fb2	d__Bacteria; p__Proteobacteria; c__Gammaproteobacteria; o__Burkholderiales; f__Oxalobacteraceae; g__uncultured
ccbe39c76f3cf74a90cc3890e399695e	d__Bacteria; p__Acidobacteriota; c__Acidobacteriae; o__Solibacterales; f__Solibacteraceae; g__Candidatus_Solibacter
ff9bd386c1be3508d9517c0582ff2e6e	d__Bacteria; p__Desulfobacterota; c__Desulfuromonadia; o__Geobacterales; f__Geobacteraceae
2e05faa2a68cf588da1ae0726110830e	d__Bacteria; p__Acidobacteriota; c__Acidobacteriae; o__Acidobacteriales; f__Acidobacteriaceae_(Subgroup_1); g__Occallatibacter
74dbb1b8ad7a945e46d43b7ab60315bf	d__Bacteria; p__Acidobacteriota; c__Holophagae; o__Holophagales; f__Holophagaceae
540020e5f2f951a1c3793394115d5d4c	d__Bacteria; p__Planctomycetota; c__Phycisphaerae; o__Tepidisphaerales; f__WD2101_soil_group; g__WD2101_soil_group
0090bbab22d081942f56dcef6a45506e	d__Archaea; p__Crenarchaeota; c__Nitrososphaeria; o__Group_1.1c; f__Group_1.1c; g__Group_1.1c; s__uncultured_crenarchaeote
be3c4552384f715851d50c7427cba00b	d__Bacteria; p__Caldisericota; c__Caldisericia; o__Caldisericales; f__Caldisericaceae; g__Caldisericum; s__uncultured_eubacterium
d64ef151dc2852954afafa689e8507ef	d__Bacteria; p__Acidobacteriota; c__Acidobacteriae; o__Subgroup_2; f__Subgroup_2; g__Subgroup_2; s__uncultured_Acidobacteria
04839dd9aa8c68a133d9a858061f5359	d__Bacteria; p__Chloroflexi; c__Anaerolineae; o__Anaerolineales; f__Anaerolineaceae; g__uncultured; s__uncultured_prokaryote
d799aefbc567352bdedf5ff1df2445e3	d__Bacteria; p__Proteobacteria; c__Alphaproteobacteria; o__Caulobacterales; f__Caulobacteraceae
06c0f81612a3c484c1a7155dc96d5898	d__Bacteria; p__Patescibacteria; c__Microgenomatia; o__Candidatus_Levybacteria; f__Candidatus_Levybacteria; g__Candidatus_Levybacteria; s__uncultured_bacterium
50554caa07224531e462a6d6c00f0a92	d__Bacteria; p__WPS-2; c__WPS-2; o__WPS-2; f__WPS-2; g__WPS-2; s__metagenome
a5c1e9fd1e4fc707388d9d4bfc65e3f2	d__Bacteria; p__Planctomycetota; c__Phycisphaerae; o__Tepidisphaerales; f__WD2101_soil_group; g__WD2101_soil_group
4d11ad68324fbc0f4195ad3005cea84b	d__Bacteria; p__Actinobacteriota
66e8543f477a6d2e7a1962dc7a7aa6d2	d__Bacteria; p__RCP2-54; c__RCP2-54; o__RCP2-54; f__RCP2-54; g__RCP2-54; s__uncultured_bacterium
4021ced12133ee172677a3a684f62654	d__Eukaryota; p__Peronosporomycetes; c__Peronosporomycetes; o__Peronosporomycetes; f__Peronosporomycetes
55693c48bf8b313ccc363433e13ef3ff	d__Bacteria; p__Acidobacteriota; c__Acidobacteriae; o__Acidobacteriales; f__Acidobacteriaceae_(Subgroup_1); g__Telmatobacter
16f78018611d813f0d5d7663fba65e13	d__Archaea; p__Crenarchaeota; c__Bathyarchaeia; o__Bathyarchaeia; f__Bathyarchaeia; g__Bathyarchaeia
feb9e4d61aaf3cee9a618945245a24df	d__Bacteria; p__Desulfobacterota; c__Syntrophia; o__Syntrophales; f__Smithellaceae; g__Smithella
d4bf64a5b4b121e7c6f1b772dc5bf510	d__Bacteria; p__Chloroflexi; c__AD3; o__AD3; f__AD3; g__AD3
53bd0777dbab7e912bfd8703cb0e540a	d__Bacteria; p__Verrucomicrobiota; c__Verrucomicrobiae; o__Opitutales; f__Opitutaceae
27b8becd3b937f635caa846fce73f23d	d__Archaea; p__Halobacterota; c__Methanomicrobia; o__Methanomicrobiales; f__Methanoregulaceae; g__Methanoregula
1a46c71a8f64d5563cce85cac13b967f	d__Bacteria; p__Patescibacteria; c__ABY1; o__Candidatus_Falkowbacteria; f__Candidatus_Falkowbacteria; g__Candidatus_Falkowbacteria
97cc1687aeecb63d7277ef52ac8556ef	d__Bacteria; p__Proteobacteria; c__Alphaproteobacteria; o__Rhizobiales; f__Xanthobacteraceae; g__uncultured
4e7cf95a0a945e3476151f4cf460b7ae	d__Bacteria; p__Patescibacteria; c__Parcubacteria; o__Candidatus_Staskawiczbacteria; f__Candidatus_Staskawiczbacteria; g__Candidatus_Staskawiczbacteria; s__uncultured_bacterium
24c75a4f9a38cf487416371609046f2c	d__Bacteria; p__Bacteroidota; c__Bacteroidia; o__Bacteroidales
aafd1b40ee03c74bd8b77159dd73dc08	d__Bacteria; p__Acidobacteriota; c__Acidobacteriae
13b6f542f891e0daf50a64e03607da29	d__Bacteria; p__Spirochaetota; c__Spirochaetia; o__Spirochaetales; f__Spirochaetaceae; g__uncultured; s__uncultured_bacterium
638be0b609d97f3853c1956a2f4c810c	d__Bacteria; p__Acidobacteriota; c__Acidobacteriae; o__Acidobacteriales; f__Acidobacteriaceae_(Subgroup_1)
e1da83a167f9d246b64f8762f2aee3bb	d__Bacteria; p__Chloroflexi; c__KD4-96; o__KD4-96; f__KD4-96; g__KD4-96; s__uncultured_Chloroflexi
f3824c79c1ab47ed6413e5c7612d5245	d__Bacteria; p__Acidobacteriota; c__Acidobacteriae; o__Solibacterales; f__Solibacteraceae; g__Candidatus_Solibacter
0fe02730cdb741f6222a8a4f4d753449	d__Bacteria; p__Planctomycetota; c__Planctomycetes; o__Pirellulales; f__Pirellulaceae; g__Pir2_lineage
44fdeeb4308c7d8df8c0e66f9379e5be	d__Archaea; p__Nanoarchaeota; c__Nanoarchaeia; o__Woesearchaeales; f__SCGC_AAA011-D5; g__SCGC_AAA011-D5; s__uncultured_archaeon
85d9adc915be50715266d2c482f826b0	d__Bacteria; p__Desulfobacterota; c__Desulfuromonadia; o__Geobacterales; f__Geobacteraceae; g__Geobacter
240b2d2ee9ce3cfb4b2e117e9917f7ca	d__Bacteria; p__Patescibacteria; c__WWE3; o__WWE3; f__WWE3; g__WWE3; s__uncultured_anaerobic
2a28ef341492bf4c5482ebb1b3faa222	d__Bacteria; p__Acidobacteriota; c__Acidobacteriae; o__Subgroup_2; f__Subgroup_2; g__Subgroup_2; s__uncultured_Acidobacteria
4b8ebffcf57256dddeda40d9601d1a06	d__Bacteria; p__Actinobacteriota; c__Thermoleophilia; o__Solirubrobacterales; f__Solirubrobacteraceae
430cae6368ae7fcd2ce4838671fb5d40	d__Bacteria; p__Planctomycetota; c__Planctomycetes; o__Pirellulales; f__Pirellulaceae
15ec3bd557148bea40e3218a4f3fb79b	d__Bacteria; p__Acidobacteriota; c__Acidobacteriae; o__Solibacterales; f__Solibacteraceae; g__Candidatus_Solibacter
02e4769c983ee4fd9d7cd3b2722005f1	d__Bacteria; p__Verrucomicrobiota; c__Verrucomicrobiae; o__Pedosphaerales; f__Pedosphaeraceae; g__Ellin516; s__uncultured_bacterium
c0de7e470a9b5a4e57808536ef2a171d	d__Bacteria; p__Acidobacteriota; c__Acidobacteriae; o__Subgroup_2; f__Subgroup_2; g__Subgroup_2; s__uncultured_forest
7a459ab52d6b2a6e84535afe58034aa8	d__Bacteria; p__Acidobacteriota; c__Acidobacteriae; o__Acidobacteriales; f__Acidobacteriaceae_(Subgroup_1); g__Acidipila; s__uncultured_bacterium
d2d4c468689c5e5ccf60deb418e2501b	d__Bacteria; p__Planctomycetota; c__Planctomycetes; o__Isosphaerales; f__Isosphaeraceae; g__Aquisphaera
21093a6096134dd288961376529f6446	d__Bacteria; p__Proteobacteria; c__Alphaproteobacteria; o__Sphingomonadales; f__Sphingomonadaceae; g__Novosphingobium; s__Novosphingobium_acidiphilum
d9dc7784c42f76cc05732f27497a91da	d__Bacteria; p__Actinobacteriota; c__Thermoleophilia; o__Gaiellales; f__uncultured; g__uncultured
cca0d8f544fc279a4e8b15d3638b4ffd	d__Bacteria; p__Bacteroidota; c__Bacteroidia; o__Bacteroidales; f__Dysgonomonadaceae; g__uncultured; s__uncultured_soil
22497c0ae4ac45e6e0e856eb6184f123	d__Bacteria; p__Acidobacteriota; c__Acidobacteriae; o__Acidobacteriales; f__Acidobacteriaceae_(Subgroup_1); g__Occallatibacter; s__bacterium_enrichment
b670e52927e1e5f4bd975a8459736a7d	d__Bacteria; p__Planctomycetota; c__Planctomycetes; o__Pirellulales; f__Pirellulaceae
9b5f0c3a66f80baffb1f6a2475ea592f	d__Bacteria; p__Patescibacteria; c__Parcubacteria; o__Parcubacteria; f__Parcubacteria; g__Parcubacteria; s__uncultured_bacterium
58ffd4f50a4f79da87544a2f1f18050e	d__Bacteria; p__Planctomycetota; c__Phycisphaerae; o__DG-20; f__DG-20; g__DG-20; s__uncultured_bacterium
9dcf51bd40ce137ee05c4d0d7586a296	d__Archaea; p__Euryarchaeota; c__Methanobacteria; o__Methanobacteriales; f__Methanobacteriaceae; g__Methanobacterium
43f6f765792fda5a93cd800bed2aa39a	Unassigned
a9e111b5830146e8c83a12db1a07470b	d__Bacteria; p__Chloroflexi; c__Dehalococcoidia; o__vadinBA26; f__vadinBA26; g__vadinBA26
ab0b5f4e26e98713b392262bfe30cea0	d__Bacteria; p__Proteobacteria; c__Gammaproteobacteria; o__Burkholderiales; f__Comamonadaceae
6794dbd212cdd913fbae0edc89b957da	d__Bacteria; p__Proteobacteria; c__Alphaproteobacteria; o__Rhizobiales; f__Beijerinckiaceae; g__Roseiarcus; s__uncultured_bacterium
cb0a0201946e3b7197b70888a78e6d38	d__Bacteria; p__Proteobacteria; c__Gammaproteobacteria; o__Burkholderiales; f__Comamonadaceae
b78f0c9d7705e08a501c96f3393bb124	d__Bacteria; p__Chloroflexi; c__Dehalococcoidia; o__vadinBA26; f__vadinBA26; g__vadinBA26
c4f8af80c348f24a241c109024744404	d__Bacteria; p__Actinobacteriota; c__Thermoleophilia; o__Gaiellales; f__uncultured; g__uncultured; s__uncultured_bacterium
7974f1b37f713d752d6b6d879023e6b9	d__Bacteria; p__Planctomycetota; c__Planctomycetes; o__Pirellulales; f__Pirellulaceae; g__Pir4_lineage; s__uncultured_bacterium
c9993966147e9ec43486fbc13d4a4266	d__Bacteria; p__Planctomycetota; c__Planctomycetes; o__Pirellulales; f__Pirellulaceae; g__uncultured
3fe1b597e3dcaaf1c5a81f340b1b3de2	d__Bacteria; p__Planctomycetota; c__Planctomycetes; o__Isosphaerales; f__Isosphaeraceae; g__Candidatus_Nostocoida; s__uncultured_planctomycete
8835d0e2b749b0ebdfb43db2c2af27b0	d__Bacteria; p__Planctomycetota; c__Planctomycetes; o__Pirellulales; f__Pirellulaceae; g__uncultured
b5c6fcf4393e4359bf81c290e611c74b	d__Bacteria; p__Actinobacteriota; c__Actinobacteria; o__Frankiales; f__Acidothermaceae; g__Acidothermus; s__uncultured_Actinomycetales
f67ff1ef63ea20bbf9d2b95c6df906b6	d__Bacteria; p__Acidobacteriota; c__Acidobacteriae; o__Acidobacteriales; f__Acidobacteriaceae_(Subgroup_1); g__uncultured
45193092cb8e819c5dcdb03a9ea63bb8	d__Bacteria; p__Proteobacteria; c__Gammaproteobacteria; o__WD260; f__WD260; g__WD260
9986bb1fd4582ec18868ef24bb8ff732	d__Bacteria; p__Verrucomicrobiota; c__Verrucomicrobiae; o__Opitutales; f__Opitutaceae; g__Opitutus
c83962dac2c57fe8869e7c5f5cdfcc88	d__Bacteria; p__Proteobacteria; c__Gammaproteobacteria; o__Burkholderiales; f__Comamonadaceae
b7f2a46f133181ade494ed007ca2038e	d__Bacteria; p__Patescibacteria; c__Parcubacteria; o__Candidatus_Staskawiczbacteria; f__Candidatus_Staskawiczbacteria; g__Candidatus_Staskawiczbacteria; s__uncultured_bacterium
857ca9f17844def1f2aa166fd9dedba3	d__Bacteria; p__Nitrospirota; c__Thermodesulfovibrionia; o__uncultured; f__uncultured; g__uncultured; s__uncultured_bacterium
0ef6238a094ec0dd0c3c6c31a7d5920e	d__Bacteria; p__Actinobacteriota; c__Thermoleophilia; o__Solirubrobacterales; f__Solirubrobacteraceae
cf1141c016cc749cd8ccc372073796ae	d__Bacteria; p__Acidobacteriota; c__Acidobacteriae; o__Subgroup_2; f__Subgroup_2; g__Subgroup_2; s__uncultured_forest
59e41320c8e762bd96e59d515f3a9579	d__Bacteria; p__Desulfobacterota; c__Desulfuromonadia; o__Geobacterales; f__Geobacteraceae; g__Citrifermentans; s__uncultured_Geobacteraceae
ec6b2f807899bcfdb875a2ce673c7158	d__Bacteria; p__Proteobacteria; c__Gammaproteobacteria; o__Chromatiales; f__Chromatiaceae; g__uncultured
e7bd4aa41c31975fa2a126594b5be85b	d__Bacteria; p__Firmicutes; c__Clostridia; o__Clostridia; f__Hungateiclostridiaceae
fc7cddce21504c901f7a02c9000119d0	d__Bacteria; p__Planctomycetota; c__Phycisphaerae; o__Tepidisphaerales; f__WD2101_soil_group; g__WD2101_soil_group
dd7d10c6b756c42070ba2b3008aefefa	d__Bacteria; p__WPS-2; c__WPS-2; o__WPS-2; f__WPS-2; g__WPS-2; s__uncultured_bacterium
60ec65cd7cb7c9f529359b7817da16e5	d__Bacteria; p__Desulfobacterota; c__Desulfuromonadia; o__Geobacterales; f__Geobacteraceae; g__Trichlorobacter
4f9938a76474939e793a7d2064b59b14	d__Bacteria; p__Chloroflexi; c__AD3; o__AD3; f__AD3; g__AD3; s__uncultured_Thermoflavimicrobium
c24e7f2b1756308cc554dea40cd39042	d__Bacteria; p__Acidobacteriota; c__Acidobacteriae; o__Acidobacteriales; f__Acidobacteriaceae_(Subgroup_1)
5d62459e2986dea984da01409138c111	d__Bacteria; p__Acidobacteriota; c__Holophagae; o__Subgroup_7; f__Subgroup_7; g__Subgroup_7; s__uncultured_Thermaerobacter
243d20f19a23d96e5d5993f971bac485	d__Bacteria; p__Spirochaetota; c__Spirochaetia; o__Spirochaetales; f__Spirochaetaceae; g__uncultured; s__uncultured_bacterium
2c5c360d3f0206b7e5328bdbfa28c546	d__Bacteria; p__Chloroflexi; c__KD4-96; o__KD4-96; f__KD4-96; g__KD4-96
19950dc9140dadb2d013c03098ee1bbc	d__Bacteria; p__Planctomycetota; c__Phycisphaerae; o__Tepidisphaerales; f__WD2101_soil_group; g__WD2101_soil_group
4ce448c653a0023e7907d5763deefcea	d__Bacteria; p__Proteobacteria; c__Gammaproteobacteria; o__Burkholderiales; f__Nitrosomonadaceae; g__GOUTA6
8ea4d56b3a5060dd8ea39ee68a76787a	d__Bacteria; p__Acidobacteriota; c__Holophagae; o__Holophagales; f__Holophagaceae; g__Geothrix
bfc04f84318e9dd3e8643d02342d5ee0	d__Bacteria; p__Chloroflexi; c__Anaerolineae; o__Anaerolineales; f__Anaerolineaceae; g__uncultured
aadf0af51a5dd07160fd53b64dce28a0	d__Bacteria; p__Acidobacteriota; c__Acidobacteriae; o__Acidobacteriales; f__Acidobacteriaceae_(Subgroup_1); g__uncultured
4c6db718871e477fd9601c09d4849310	d__Bacteria; p__Verrucomicrobiota; c__Verrucomicrobiae; o__Opitutales; f__Opitutaceae; g__uncultured; s__uncultured_Verrucomicrobia
0a3c7085f850bdbbb5e9c1c3bce32e39	d__Bacteria; p__Acidobacteriota; c__Acidobacteriae; o__Acidobacteriales; f__uncultured; g__uncultured
765ec0bdec5d1ba40a6de54680409fd1	d__Bacteria; p__Actinobacteriota; c__Thermoleophilia; o__Solirubrobacterales; f__Solirubrobacteraceae; g__uncultured
2f84296caa6756e042306d1ac4d15dce	d__Bacteria; p__Firmicutes; c__Clostridia; o__Clostridia; f__Hungateiclostridiaceae; g__Saccharofermentans; s__uncultured_bacterium
393f31079fa3c9ed57b78eab33edcf72	d__Bacteria; p__Proteobacteria; c__Alphaproteobacteria; o__Rhizobiales; f__Xanthobacteraceae; g__uncultured
15db2e47ed7ed3c6b9a49833f2ba569e	d__Bacteria; p__Bacteroidota; c__Bacteroidia; o__Sphingobacteriales; f__Lentimicrobiaceae; g__Lentimicrobiaceae; s__uncultured_bacterium
da930b11dd842fe7d1e471dbe3dd4e92	d__Bacteria; p__Planctomycetota; c__Phycisphaerae; o__Tepidisphaerales; f__CPla-3_termite_group; g__CPla-3_termite_group; s__metagenome
f4459f823d3decb9968d8a7021a588ea	d__Bacteria; p__Acidobacteriota; c__Holophagae; o__Holophagales; f__Holophagaceae
3aca9d082b074535e80d93490ecf16ab	d__Bacteria; p__Acidobacteriota; c__Acidobacteriae; o__Solibacterales; f__Solibacteraceae; g__Candidatus_Solibacter
2cf3817b8dfa417f2569d3727b6aa4d8	d__Eukaryota; p__Phragmoplastophyta; c__Embryophyta; o__Magnoliophyta; f__Magnoliophyta; g__Magnoliophyta
1f7babdd4fad7539d3eebd68c0372e0a	d__Bacteria; p__Planctomycetota; c__Phycisphaerae; o__Tepidisphaerales; f__WD2101_soil_group; g__WD2101_soil_group
954b8db4c66ecd4a3d1e9ccf0fa8c020	d__Bacteria; p__Planctomycetota; c__Planctomycetes; o__Pirellulales; f__Pirellulaceae; g__uncultured
ba44c3c761874444f924f8b125b2344f	d__Bacteria; p__Acidobacteriota; c__Acidobacteriae; o__Acidobacteriales; f__Acidobacteriaceae_(Subgroup_1)
3cf83fd9a6ca2345fe2f9cb3c972ccee	d__Bacteria; p__Acidobacteriota; c__Acidobacteriae; o__Acidobacteriales; f__Acidobacteriaceae_(Subgroup_1); g__Granulicella
8d7729f047b348d5cd65aaf9abd27b59	d__Bacteria; p__Actinobacteriota; c__Thermoleophilia; o__Solirubrobacterales; f__Solirubrobacteraceae; g__uncultured; s__uncultured_bacterium
6b8fdbb11b4fa1b73837f77ac0a725c6	d__Bacteria; p__Proteobacteria; c__Alphaproteobacteria
e3bca110df5fe27228dff580075a8601	d__Bacteria; p__Proteobacteria; c__Gammaproteobacteria; o__Burkholderiales; f__Oxalobacteraceae; g__uncultured
d3a1897339470459bebe44bd8c67ae8a	d__Bacteria; p__Verrucomicrobiota; c__Verrucomicrobiae; o__Opitutales; f__Opitutaceae; g__uncultured; s__uncultured_bacterium
692246ad3f59a187149780b6307efc1c	d__Bacteria; p__Patescibacteria; c__Berkelbacteria; o__Berkelbacteria; f__Berkelbacteria; g__Berkelbacteria; s__uncultured_bacterium
f9f38fdb0f07f98dcb50db22ea0e7b73	d__Bacteria; p__Bacteroidota; c__Bacteroidia; o__Bacteroidales
adcef6f4aba2c54cf0d8101d68076d0e	d__Bacteria; p__Acidobacteriota; c__Acidobacteriae; o__GOUTB8; f__GOUTB8; g__GOUTB8; s__uncultured_bacterium
78fa9b820f1ea08c472db28e4d69de9b	d__Bacteria; p__Proteobacteria; c__Alphaproteobacteria; o__Acetobacterales; f__Acetobacteraceae; g__Rhodovastum; s__metagenome
4adb56ca3d647f6f72ec8dfda35d8bcb	d__Archaea; p__Halobacterota; c__Methanomicrobia; o__Methanomicrobiales; f__Methanoregulaceae; g__Methanoregula
68a3bb2e02987d307136c86789974b79	d__Bacteria; p__Planctomycetota; c__Planctomycetes; o__Pirellulales; f__Pirellulaceae
3341a2dbb90ddf7212a261d73848d181	d__Bacteria; p__Bacteroidota; c__Bacteroidia; o__Bacteroidales; f__Dysgonomonadaceae; g__uncultured; s__uncultured_soil
4942d406e2eb9d6d80ce0862fc265db9	d__Bacteria; p__Proteobacteria; c__Alphaproteobacteria; o__Rhizobiales; f__Xanthobacteraceae; g__Pseudolabrys
c6bfe5f63528a09c77f79644076a1a24	d__Bacteria; p__Proteobacteria; c__Alphaproteobacteria; o__Acetobacterales; f__Acetobacteraceae; g__uncultured; s__metagenome
28e431d40b6685044d637c7560e08f18	d__Bacteria; p__Bacteroidota; c__Bacteroidia; o__Bacteroidales
9a023f687af546e0426627debdef794d	d__Archaea; p__Halobacterota; c__Methanomicrobia; o__Methanomicrobiales; f__Methanomicrobiales; g__uncultured
323f489869333a93a33d19eb360bf4a0	d__Bacteria; p__Desulfobacterota; c__Syntrophia; o__Syntrophales; f__Smithellaceae; g__Smithella; s__uncultured_delta
54eb67fb47530100a75704860e917b48	d__Eukaryota; p__Phragmoplastophyta; c__Embryophyta
84b9ec5612dc0c3950b743f2737007b0	d__Bacteria; p__Acidobacteriota; c__Acidobacteriae; o__Acidobacteriales; f__Acidobacteriaceae_(Subgroup_1); g__uncultured
dd0ecdac4a7e1859e5246f0d6819a475	d__Bacteria; p__Fibrobacterota; c__Fibrobacteria; o__Fibrobacterales; f__B122; g__B122; s__uncultured_Fibrobacteres
9ff45d0098f202765f0861b380f10fe6	d__Bacteria; p__WPS-2; c__WPS-2; o__WPS-2; f__WPS-2; g__WPS-2; s__uncultured_bacterium
770acca778f53c66ff2efea80c5f8b66	d__Bacteria; p__WPS-2; c__WPS-2; o__WPS-2; f__WPS-2; g__WPS-2
2893e7b7ccecfeb2cf51240049964ce9	d__Bacteria; p__Desulfobacterota; c__Desulfuromonadia; o__Geobacterales; f__Geobacteraceae
180487a7a7f21777f4f2c39778df3b09	d__Bacteria; p__Acidobacteriota; c__Acidobacteriae; o__Solibacterales; f__Solibacteraceae; g__Candidatus_Solibacter
328a9168141561894697c8785fb84154	d__Bacteria; p__Chloroflexi; c__AD3; o__AD3; f__AD3; g__AD3; s__uncultured_Thermoflavimicrobium
eadc4e755d04dfa200d59534aba66262	d__Bacteria; p__Chloroflexi; c__Dehalococcoidia; o__Dehalococcoidales; f__Dehalococcoidaceae; g__Dehalococcoides; s__uncultured_bacterium
8ed6a753e6437b56f4c89f3df4e92f32	d__Bacteria; p__Acidobacteriota; c__Acidobacteriae; o__Solibacterales; f__Solibacteraceae; g__Candidatus_Solibacter
cb31c2c660ac4de4b70caebcb47ce241	d__Bacteria; p__Acidobacteriota; c__Acidobacteriae; o__Acidobacteriae; f__Acidobacteriae; g__Paludibaculum
e4fdfb9e036ceecea8aa6e0fae5c7bb5	d__Bacteria; p__Patescibacteria; c__Microgenomatia; o__Candidatus_Levybacteria; f__Candidatus_Levybacteria; g__Candidatus_Levybacteria; s__uncultured_bacterium
c42ab5f80c191594a95c3a4d5d6a9118	d__Bacteria; p__Acidobacteriota; c__Acidobacteriae; o__Acidobacteriales; f__uncultured; g__uncultured
239eda987412384cb4861b1a048fc253	d__Bacteria; p__Proteobacteria; c__Gammaproteobacteria; o__Burkholderiales; f__Nitrosomonadaceae; g__Ellin6067; s__uncultured_beta
bd54040a58c38eeabd835505c2c69745	d__Bacteria; p__Actinobacteriota; c__Thermoleophilia; o__Solirubrobacterales; f__Solirubrobacteraceae; g__Conexibacter
aba49d83857ff27c8b1396d03518fc77	d__Archaea; p__Halobacterota; c__Methanosarcinia; o__Methanosarciniales; f__Methanosarcinaceae; g__Methanosarcina
f951997c5aa67190cdd74cb2cfb13d9a	d__Bacteria; p__Firmicutes; c__Negativicutes; o__Veillonellales-Selenomonadales
076da781383da43d0938fd3d45cc6ffc	d__Bacteria; p__Gemmatimonadota; c__Gemmatimonadetes; o__Gemmatimonadales; f__Gemmatimonadaceae; g__Gemmatimonas; s__uncultured_bacterium
7ea285280457e9215e7af08dfb5d66f2	d__Bacteria; p__Patescibacteria; c__Berkelbacteria; o__Berkelbacteria; f__Berkelbacteria; g__Berkelbacteria; s__candidate_division
cea565730466c79a34b1c2dd4605a1a8	d__Bacteria; p__Verrucomicrobiota; c__Omnitrophia; o__Omnitrophales; f__Omnitrophaceae; g__Candidatus_Omnitrophus
b45125db9eb8b3e5eff2ee4f23d1f9b7	d__Bacteria; p__Planctomycetota; c__Planctomycetes; o__Gemmatales; f__Gemmataceae; g__uncultured
c1cad7756c375ef4a934eb30caf39939	d__Bacteria; p__Desulfobacterota; c__Syntrophia; o__Syntrophales; f__Smithellaceae; g__Smithella; s__uncultured_delta
8557923ee32fbf8cf0db633376adf760	d__Bacteria; p__Chloroflexi; c__AD3; o__AD3; f__AD3; g__AD3; s__uncultured_Thermoflavimicrobium
deb266309fc74df8ecb17f58f9d027ec	d__Bacteria; p__Planctomycetota; c__Phycisphaerae; o__Phycisphaerales; f__AKAU3564_sediment_group; g__AKAU3564_sediment_group; s__uncultured_organism
8d7b2e8535d909e49ab00e4e0800663b	d__Bacteria; p__Proteobacteria; c__Alphaproteobacteria; o__Rhizobiales; f__Xanthobacteraceae; g__Bradyrhizobium
07ce7c780993dd8a0a91b1639cb3a667	d__Bacteria; p__Acidobacteriota; c__Acidobacteriae; o__Solibacterales; f__Solibacteraceae; g__Candidatus_Solibacter
090eef7da04e22aee39d78cfd934d93c	d__Bacteria; p__Bacteroidota; c__Bacteroidia; o__Bacteroidales
d0c675465f9667aa0c2ccc72d690b291	d__Bacteria; p__Firmicutes; c__Clostridia; o__Clostridia; f__Hungateiclostridiaceae; g__uncultured
9414f04b61899b796cd4f862792c429a	d__Bacteria; p__Acidobacteriota; c__Acidobacteriae; o__Solibacterales; f__Solibacteraceae; g__Candidatus_Solibacter
7e6d41dd2436f145f596d69ea6950b3e	d__Bacteria; p__Proteobacteria; c__Alphaproteobacteria; o__Rhizobiales; f__Xanthobacteraceae; g__uncultured
317e2407ac0347a1ed3c7fe02bb2c44e	d__Bacteria; p__Acidobacteriota; c__Holophagae; o__Holophagales; f__Holophagaceae; g__Geothrix
febc786a5fbaa10fb3371f89bef58071	d__Bacteria; p__Myxococcota; c__Polyangia; o__Haliangiales; f__Haliangiaceae; g__Haliangium; s__uncultured_proteobacterium
681ed3bd4fd3e764c5b8c3dad8d74714	d__Bacteria; p__Desulfobacterota; c__Desulfuromonadia; o__Geobacterales; f__Geobacteraceae
d00eb0fdbff07ff56f054735b8450d19	d__Eukaryota; p__Apicomplexa; c__Conoidasida; o__Gregarinasina; f__Eugregarinorida; g__Eugregarinorida
bb883a38d4a2550baa9b5c6471482e50	d__Eukaryota; p__Basidiomycota; c__Agaricomycetes
63adbb7bebba33f5f811fbd380ba05b8	d__Bacteria; p__Bacteroidota; c__Bacteroidia; o__Sphingobacteriales; f__Lentimicrobiaceae; g__Lentimicrobiaceae; s__uncultured_bacterium
4821154372a9aa6f50f303957ed37b6e	d__Bacteria; p__Patescibacteria; c__Parcubacteria; o__Parcubacteria; f__Parcubacteria; g__Parcubacteria; s__uncultured_bacterium
ab9bf5dcf8eaf5191a58c46daaface32	d__Bacteria; p__Bacteroidota; c__Bacteroidia; o__Bacteroidales; f__Dysgonomonadaceae; g__uncultured; s__metagenome
06885af5ff37ff88f51717a6c97cd7d5	d__Bacteria; p__Actinobacteriota; c__Thermoleophilia; o__Solirubrobacterales; f__Solirubrobacteraceae; g__Conexibacter
b406ccc1c0c491a9b5129ca5c781d124	d__Bacteria; p__Acidobacteriota; c__Acidobacteriae; o__Acidobacteriales; f__Acidobacteriaceae_(Subgroup_1); g__Occallatibacter; s__bacterium_enrichment
8d5d645f4ae2ce63c67b78fa3259aaf2	d__Bacteria; p__Acidobacteriota; c__Acidobacteriae; o__Subgroup_2; f__Subgroup_2; g__Subgroup_2; s__uncultured_forest
e3c26ca1c59a1f26029aafbb662965f8	d__Bacteria
808e28fb372a7abe89be8cbc9d4a55ec	d__Bacteria; p__Acidobacteriota; c__Acidobacteriae; o__Subgroup_2; f__Subgroup_2; g__Subgroup_2; s__uncultured_Holophaga
bc20d06147d0420ce7955629c67dbb08	d__Bacteria; p__Acidobacteriota; c__Acidobacteriae
d4ed06f8d64aa02bc9d39040c4d8f26c	d__Bacteria; p__Verrucomicrobiota; c__Verrucomicrobiae; o__Methylacidiphilales; f__Methylacidiphilaceae; g__uncultured; s__uncultured_bacterium
47f25a12f2d985e80bfcc685f9894f34	d__Bacteria; p__Proteobacteria; c__Alphaproteobacteria; o__Rhizobiales; f__Xanthobacteraceae; g__Bradyrhizobium; s__Bradyrhizobium_canariense
67208b40cce6d86a665616e049aaf145	d__Bacteria; p__Myxococcota; c__Polyangia; o__Haliangiales; f__Haliangiaceae; g__Haliangium
5a72522f4592a1c92948531a637f65e2	d__Bacteria; p__Bacteroidota; c__Bacteroidia; o__Bacteroidales
60f3197d19409c5bebf3d013f9fe0b15	d__Bacteria; p__RCP2-54; c__RCP2-54; o__RCP2-54; f__RCP2-54; g__RCP2-54; s__uncultured_bacterium
c6d6feed530f7f7d8ce689f4dbdf087d	d__Bacteria; p__Acidobacteriota; c__Acidobacteriae; o__Acidobacteriales; f__Acidobacteriaceae_(Subgroup_1); g__Occallatibacter
ab130f5f0650bc6cbe4a40a0aaedc27c	d__Bacteria; p__Bacteroidota; c__Bacteroidia; o__Bacteroidales; f__Bacteroidetes_vadinHA17; g__Bacteroidetes_vadinHA17; s__uncultured_Bacteroidales
f3fcdf7ee9bdbc8fa463b6ec30335499	d__Bacteria; p__Bacteroidota; c__Bacteroidia; o__Bacteroidales; f__Paludibacteraceae; g__Paludibacter; s__uncultured_bacterium
96ce9792adf56c1a922f74978b3bc7ed	d__Bacteria; p__Verrucomicrobiota; c__Verrucomicrobiae; o__Opitutales; f__Opitutaceae; g__uncultured; s__uncultured_Verrucomicrobia
fba4a25f0488654951a1039a10d0c7e9	d__Bacteria; p__Acidobacteriota; c__Acidobacteriae; o__Acidobacteriae; f__Acidobacteriae; g__Paludibaculum; s__uncultured_Acidobacteria
654e606666306ca30c098f8c7e43e8c4	d__Bacteria; p__Planctomycetota; c__Phycisphaerae; o__Tepidisphaerales; f__WD2101_soil_group; g__WD2101_soil_group; s__uncultured_bacterium
cad2783882bafb6ae6598d42afd5b080	d__Bacteria; p__Actinobacteriota; c__Actinobacteria; o__Frankiales; f__Acidothermaceae; g__Acidothermus; s__uncultured_bacterium
b5a8cb332d0a9047f5fc503fdebeb9c6	d__Bacteria; p__Proteobacteria; c__Gammaproteobacteria; o__Burkholderiales; f__Comamonadaceae
d6e472006c8dc3d603afb8ea70dab86f	d__Bacteria; p__Bacteroidota; c__Bacteroidia; o__Bacteroidales; f__Paludibacteraceae; g__Paludibacter; s__uncultured_bacterium
7ee9a3b9bfa6f92806f45340d96cbfc1	d__Bacteria; p__Proteobacteria; c__Gammaproteobacteria; o__Burkholderiales; f__Rhodocyclaceae; g__Candidatus_Accumulibacter
8a5345050fa0840b156275d487161988	d__Bacteria; p__Planctomycetota; c__Phycisphaerae; o__Tepidisphaerales; f__WD2101_soil_group; g__WD2101_soil_group
cce5a5a29775a7897fb0b5960c8a1930	d__Bacteria; p__Bacteroidota; c__Bacteroidia; o__Bacteroidales; f__Paludibacteraceae; g__Paludibacter; s__uncultured_bacterium
de29edbbc6499145d95c5b62d6dfbabd	d__Bacteria; p__Actinobacteriota; c__Thermoleophilia; o__Solirubrobacterales; f__Solirubrobacteraceae
fe46be7d188e6b32f97f44706651028f	d__Bacteria; p__Firmicutes; c__Clostridia; o__Clostridia; f__Hungateiclostridiaceae; g__uncultured
718ab7cf9b775b1ac19ef7849094e103	d__Bacteria; p__Bacteroidota; c__Bacteroidia; o__Bacteroidales; f__Paludibacteraceae; g__uncultured
3eaedd4bef899f2c690747d7c39c4bb3	d__Bacteria; p__Chloroflexi; c__KD4-96; o__KD4-96; f__KD4-96; g__KD4-96; s__uncultured_Anaerolineaceae
7f055c11d1c53a1eec37a4a458e1be5f	d__Bacteria; p__Acidobacteriota; c__Acidobacteriae
228db4ca42194a20475f26616961bcde	d__Eukaryota; p__Phragmoplastophyta; c__Embryophyta; o__Magnoliophyta; f__Magnoliophyta; g__Magnoliophyta
1eb41b3a6df089ad27e46a8521a07328	d__Bacteria; p__Bacteroidota; c__Bacteroidia; o__Bacteroidales; f__Prolixibacteraceae; g__WCHB1-32
0ff85737dc18ab08a065fd4c7419338e	d__Bacteria; p__Patescibacteria; c__Microgenomatia; o__Candidatus_Shapirobacteria; f__Candidatus_Shapirobacteria; g__Candidatus_Shapirobacteria; s__uncultured_bacterium
6738aace576b5556bf17e558bae674b3	d__Bacteria; p__Acidobacteriota; c__Acidobacteriae; o__Subgroup_2; f__Subgroup_2; g__Subgroup_2; s__uncultured_forest
5975f55c96a0e7f73e9d5829a935c872	d__Bacteria; p__Proteobacteria; c__Alphaproteobacteria; o__Micropepsales; f__Micropepsaceae
e277759f9c115b0e47a8e99c56f2aeeb	d__Bacteria; p__Patescibacteria; c__Microgenomatia; o__Candidatus_Gottesmanbacteria; f__Candidatus_Gottesmanbacteria; g__Candidatus_Gottesmanbacteria
feb64f8b6a0af7f86f43185359876623	d__Bacteria; p__Bacteroidota; c__Bacteroidia; o__Bacteroidales; f__Bacteroidetes_vadinHA17; g__Bacteroidetes_vadinHA17; s__uncultured_Bacteroidales
94adf9dc1bb2d6161d3c7bd8b465def1	d__Bacteria; p__Actinobacteriota; c__Thermoleophilia; o__Solirubrobacterales; f__Solirubrobacteraceae; g__Conexibacter
db3a38844ab24bea558bb1421e790d58	d__Bacteria; p__Proteobacteria; c__Alphaproteobacteria; o__Rhizobiales; f__Xanthobacteraceae
e363d0096519d8c4c71275d6e94d101e	d__Bacteria; p__Patescibacteria; c__Microgenomatia; o__Candidatus_Woesebacteria; f__Candidatus_Woesebacteria; g__Candidatus_Woesebacteria
0b0b5cd42072bd71eb2f748f79fae53e	d__Bacteria; p__Acidobacteriota; c__Acidobacteriae; o__Subgroup_2; f__Subgroup_2; g__Subgroup_2
fec7c2d837dfb174fba7f56338097287	d__Bacteria; p__Chloroflexi; c__KD4-96; o__KD4-96; f__KD4-96; g__KD4-96
6f6fa00137c92ea9335e480dc480b4ec	d__Bacteria; p__Actinobacteriota; c__Actinobacteria; o__Frankiales; f__Acidothermaceae; g__Acidothermus
2712563b2f5493e458f4cdb127a9884c	d__Bacteria; p__Proteobacteria; c__Alphaproteobacteria; o__Acetobacterales; f__Acetobacteraceae; g__Rhodovastum; s__metagenome
5304c69250111ce3baf1a5a583fce59d	d__Bacteria; p__Actinobacteriota; c__Actinobacteria; o__Frankiales; f__Acidothermaceae; g__Acidothermus
a420e964a9eba2b946dbfb9a22e0d8c6	d__Bacteria; p__Chloroflexi; c__AD3; o__AD3; f__AD3; g__AD3; s__uncultured_Chloroflexi
6ef23e8b594399a6bf6bae31eab2ea65	d__Bacteria; p__Actinobacteriota; c__Acidimicrobiia; o__uncultured; f__uncultured; g__uncultured; s__uncultured_forest
b78caf0a13dd0bfbbd68185285de6fce	d__Bacteria; p__Chloroflexi; c__KD4-96; o__KD4-96; f__KD4-96; g__KD4-96; s__uncultured_Anaerolineaceae
76d939fc46c3fe4c5dab12e9972c3aac	d__Archaea; p__Halobacterota; c__Methanomicrobia; o__Methanomicrobiales; f__Rice_Cluster_II; g__Rice_Cluster_II; s__uncultured_methanogenic
342d89040bad19856294bf969d31dae2	d__Bacteria; p__Proteobacteria; c__Gammaproteobacteria; o__Burkholderiales; f__Nitrosomonadaceae; g__Ellin6067; s__uncultured_beta
f4395a9cd3575a09ea1c73cb887a062f	d__Bacteria; p__Acidobacteriota; c__Holophagae; o__Subgroup_7; f__Subgroup_7; g__Subgroup_7; s__uncultured_Thermaerobacter
cea1859e46406cdce74cb9884f9efcdd	d__Archaea; p__Halobacterota; c__Methanomicrobia; o__Methanomicrobiales; f__Methanoregulaceae; g__Methanoregula
839d3f15c4d79875d8a90b380c59b0fd	d__Bacteria; p__Patescibacteria; c__ABY1; o__Candidatus_Falkowbacteria; f__Candidatus_Falkowbacteria; g__Candidatus_Falkowbacteria
30b69f0126d4b434f5499a1ff514477b	d__Bacteria; p__Desulfobacterota; c__Desulfuromonadia; o__Geobacterales; f__Geobacteraceae; g__Citrifermentans; s__uncultured_Geobacteraceae
6451f437dab3c392ed9a5a0e001a4dac	Unassigned
c7ec83e61ce2018eeb374f94ac0ca294	d__Bacteria; p__Verrucomicrobiota; c__Verrucomicrobiae; o__Opitutales; f__Opitutaceae; g__Lacunisphaera; s__metagenome
4ab31869cb648ed85e5fb64990d3619a	d__Bacteria; p__Proteobacteria; c__Gammaproteobacteria; o__Burkholderiales; f__Comamonadaceae
9d9e16cf615270fc9678978263d324b4	d__Bacteria; p__Planctomycetota; c__Planctomycetes; o__Pirellulales; f__Pirellulaceae; g__uncultured; s__uncultured_bacterium
22dff7dd831e5285b0210fa97c41442d	d__Bacteria; p__Methylomirabilota; c__Methylomirabilia; o__Methylomirabilales; f__Methylomirabilaceae; g__Sh765B-TzT-35; s__uncultured_bacterium
95dfa0384fc5d24aae2b5f83add0f472	d__Bacteria; p__Chloroflexi; c__KD4-96; o__KD4-96; f__KD4-96; g__KD4-96
0e56a4459a0dcb63376bbee1a3fb2f0c	Unassigned
cf9fcf040d77dbeb4a2323e2b0669170	d__Archaea; p__Crenarchaeota; c__Bathyarchaeia; o__Bathyarchaeia; f__Bathyarchaeia; g__Bathyarchaeia
791115762ed540f31b15f7b2edeb593a	Unassigned
b069ed9d0346a08fe2eed60fcd9b6e9f	d__Bacteria; p__Actinobacteriota; c__Thermoleophilia; o__Solirubrobacterales; f__Solirubrobacteraceae; g__uncultured; s__uncultured_bacterium
ef4691544f63242248ae1d87d6a2b708	d__Bacteria; p__Actinobacteriota; c__Thermoleophilia; o__Gaiellales; f__uncultured; g__uncultured; s__uncultured_bacterium
f7fd0d9d47fa02772f1fd83baecb4b22	d__Bacteria; p__Verrucomicrobiota; c__Verrucomicrobiae; o__Pedosphaerales; f__Pedosphaeraceae; g__Pedosphaeraceae
77fc586d2920ce73e3951160cdd39c01	d__Bacteria; p__Acidobacteriota; c__Acidobacteriae; o__Acidobacteriales; f__Acidobacteriaceae_(Subgroup_1)
4cad2ea95e4d0b59e7f2cdf244c8fbcc	d__Bacteria; p__Acidobacteriota; c__Acidobacteriae; o__Acidobacteriales; f__Acidobacteriaceae_(Subgroup_1); g__Occallatibacter
370d78282d1116b2d21a8e51ff9198aa	d__Bacteria; p__Bacteroidota; c__Bacteroidia; o__Bacteroidales
7ca6871e683ab801805605eef8696f8e	d__Bacteria; p__Actinobacteriota; c__Actinobacteria; o__Frankiales; f__Acidothermaceae; g__Acidothermus; s__uncultured_bacterium
61c7f417167ed24e18d1d22694db3c24	d__Bacteria; p__Firmicutes; c__Negativicutes; o__Veillonellales-Selenomonadales
5428cc0d1427fba6dbc23ea195ba9fad	d__Bacteria; p__Actinobacteriota; c__Acidimicrobiia; o__uncultured; f__uncultured; g__uncultured; s__uncultured_Actinomycetales
848affd7ad43cbbc79122b762814decf	d__Bacteria; p__Armatimonadota; c__Fimbriimonadia; o__Fimbriimonadales; f__Fimbriimonadaceae; g__Fimbriimonadaceae; s__uncultured_bacterium
83c9833ed17f5059a018fdc351247b94	d__Bacteria; p__Actinobacteriota; c__Actinobacteria; o__Frankiales; f__Acidothermaceae; g__Acidothermus
da44671190c2654ed6c3d83fd5fe62cd	d__Bacteria; p__Planctomycetota; c__Phycisphaerae; o__Tepidisphaerales; f__WD2101_soil_group; g__WD2101_soil_group
a5b37eeffecbc4862098173f6cf0e1b3	d__Bacteria; p__Bacteroidota; c__Bacteroidia; o__Bacteroidales; f__Prolixibacteraceae; g__BSV13; s__uncultured_Bacteroidetes
42f449a2c5495b36174414c2819d2a24	d__Bacteria; p__Acidobacteriota; c__Acidobacteriae; o__Acidobacteriales; f__Acidobacteriaceae_(Subgroup_1); g__uncultured
d9d7d6d8ec77cfdb66e38896ebdbea71	d__Bacteria; p__Actinobacteriota; c__Actinobacteria; o__Corynebacteriales; f__Mycobacteriaceae; g__Mycobacterium
03a15a5c8bab41814715100c89faa6c9	d__Bacteria; p__Actinobacteriota; c__Thermoleophilia; o__Solirubrobacterales; f__Solirubrobacteraceae; g__Conexibacter
278c7de037c2017ed2a1eb9e6304511b	d__Bacteria; p__Proteobacteria; c__Gammaproteobacteria; o__Burkholderiales; f__Comamonadaceae
94a2667e7ae1c9ca177765f3858924cd	d__Bacteria; p__Acidobacteriota; c__Acidobacteriae; o__Acidobacteriae; f__Acidobacteriae; g__Paludibaculum; s__uncultured_Acidobacteria
130d171732499c4550181dcc4a5255b5	d__Bacteria; p__Planctomycetota; c__Planctomycetes; o__Pirellulales; f__Pirellulaceae; g__uncultured; s__uncultured_Planctomycetaceae
5b931d0b1d8b04605b541b44f5c3f891	d__Bacteria; p__Acidobacteriota; c__Acidobacteriae; o__Subgroup_2; f__Subgroup_2; g__Subgroup_2; s__uncultured_forest
8d3641e2b0641fbb9a605330dc6fa831	d__Bacteria; p__Actinobacteriota; c__Acidimicrobiia; o__uncultured; f__uncultured; g__uncultured; s__uncultured_Actinomycetales
fa25babf54c0ba9e7c6dbdfaf59b34d0	d__Bacteria; p__Chloroflexi; c__AD3; o__AD3; f__AD3; g__AD3; s__uncultured_Thermoflavimicrobium
b3e131a5b3e5d2920162a9092f0cbf45	d__Bacteria; p__Proteobacteria; c__Gammaproteobacteria; o__JG36-TzT-191; f__JG36-TzT-191; g__JG36-TzT-191; s__uncultured_bacterium
439b9795fec3375e0f87341399b6e998	d__Bacteria; p__Actinobacteriota; c__Thermoleophilia; o__Solirubrobacterales; f__Solirubrobacteraceae; g__uncultured; s__uncultured_bacterium
4de6bb0ef343d92fa896a6d167134f09	d__Bacteria; p__Proteobacteria; c__Alphaproteobacteria; o__Acetobacterales; f__Acetobacteraceae; g__uncultured; s__uncultured_bacterium
72db7b13d4968a64b098c73b0bb5ad8b	d__Bacteria; p__Planctomycetota; c__Planctomycetes; o__Isosphaerales; f__Isosphaeraceae
84f13ba7be08ae03fee80d905609a801	d__Bacteria; p__Patescibacteria; c__Parcubacteria; o__Parcubacteria; f__Parcubacteria; g__Parcubacteria; s__uncultured_bacterium
523ad4b6a2661bbfb055582c77a5b9aa	d__Bacteria; p__Bacteroidota; c__Bacteroidia; o__Bacteroidales
89bce5a5d9a2d874117a3ee9958f6c6c	d__Bacteria; p__Patescibacteria; c__Parcubacteria; o__Parcubacteria; f__Parcubacteria; g__Parcubacteria; s__uncultured_bacterium
8e421c1d7b1f8433810326c5f7013c70	d__Bacteria; p__Proteobacteria; c__Alphaproteobacteria; o__Rhizobiales; f__Beijerinckiaceae; g__Rhodoblastus; s__uncultured_bacterium
5ef7e7f4052861eff769b954b845ccf9	d__Bacteria; p__Acidobacteriota; c__Acidobacteriae; o__Solibacterales; f__Solibacteraceae; g__Candidatus_Solibacter
5f54d7fe5da6dc83c82d2ab3b57e8999	d__Bacteria; p__Proteobacteria; c__Gammaproteobacteria; o__Burkholderiales; f__TRA3-20; g__TRA3-20
9df8d70022468c9decffd9534eda5822	d__Bacteria; p__Patescibacteria; c__Parcubacteria; o__Parcubacteria; f__Parcubacteria; g__Parcubacteria; s__uncultured_bacterium
d672f9c038d4709a1b5c2ca046742756	d__Bacteria; p__Verrucomicrobiota; c__Verrucomicrobiae; o__Pedosphaerales; f__Pedosphaeraceae; g__Ellin516; s__uncultured_bacterium
21ecb43912a2dfae81bfc60125a57bf0	d__Bacteria; p__Acidobacteriota; c__Acidobacteriae; o__Solibacterales; f__Solibacteraceae; g__Candidatus_Solibacter
6e4536f8e8e3f8cad1254fcfd0ac3e6b	d__Bacteria; p__Desulfobacterota; c__Desulfuromonadia; o__Geobacterales; f__Geobacteraceae; g__Citrifermentans; s__uncultured_Geobacteraceae
a97b5fd145491612fe535497ea7a9810	d__Bacteria; p__Proteobacteria; c__Gammaproteobacteria; o__Pseudomonadales; f__Pseudomonadaceae; g__Pseudomonas
313fabd76e21c6420a4ee1784398849e	d__Bacteria; p__Planctomycetota; c__Planctomycetes; o__Isosphaerales; f__Isosphaeraceae; g__Aquisphaera
5f656830827eb6b5ee8ed3a27507f25e	d__Bacteria; p__WPS-2; c__WPS-2; o__WPS-2; f__WPS-2; g__WPS-2; s__uncultured_Firmicutes
2bd94530bf8e41f6db51cf4ed0da485c	d__Bacteria; p__Proteobacteria; c__Gammaproteobacteria
846c7c1dee9bf3c03e66bb0415c655d8	d__Bacteria; p__Proteobacteria; c__Alphaproteobacteria; o__Rhizobiales; f__Xanthobacteraceae; g__Pseudolabrys
06e1a74ee3af109a33ecf249b900515d	d__Bacteria; p__Bacteroidota; c__Bacteroidia; o__Bacteroidales
70275d5da57618bbbea14c80659e28e4	d__Eukaryota
dcddb09f104be057a3f45c44c123c440	d__Bacteria; p__Bacteroidota; c__Bacteroidia; o__Bacteroidales; f__Prolixibacteraceae; g__BSV13
d7f28094a0e2a3e11de28c32f1151402	d__Bacteria; p__Actinobacteriota; c__Acidimicrobiia; o__IMCC26256; f__IMCC26256; g__IMCC26256
2a8f31f9716b6dc155de28e803bdabe7	d__Bacteria; p__Patescibacteria; c__WWE3; o__WWE3; f__WWE3; g__WWE3; s__uncultured_anaerobic
91c45964e8f354ba49c84d545920acea	d__Bacteria; p__Patescibacteria; c__Parcubacteria; o__Candidatus_Nomurabacteria; f__Candidatus_Nomurabacteria; g__Candidatus_Nomurabacteria; s__uncultured_soil
afa3b71ecfe65b8acec89c8851ed410a	d__Bacteria; p__Proteobacteria; c__Gammaproteobacteria; o__Burkholderiales; f__Oxalobacteraceae; g__uncultured; s__bacterium_enrichment
55381905a601082ffdbd826f2c2d0ecc	d__Bacteria; p__Planctomycetota; c__Phycisphaerae; o__DG-20; f__DG-20; g__DG-20; s__uncultured_bacterium
325271890944c0328d4b2b44ea571a51	d__Bacteria; p__Firmicutes; c__Clostridia; o__Christensenellales; f__Christensenellaceae
48d92e572aec1d74619b129bb7b240fb	d__Bacteria; p__Verrucomicrobiota; c__Verrucomicrobiae; o__Opitutales; f__Opitutaceae
5e1826af592d175d5cd0bc56fa361c61	d__Bacteria; p__Verrucomicrobiota; c__Verrucomicrobiae; o__Opitutales; f__Opitutaceae; g__Opitutus
48418c75359f088b981f7b236fecb7c6	d__Bacteria; p__Firmicutes; c__Negativicutes; o__Veillonellales-Selenomonadales; f__Sporomusaceae; g__uncultured
b6045b65288452b52bef2410c01d492e	d__Bacteria; p__Armatimonadota; c__Fimbriimonadia; o__Fimbriimonadales; f__Fimbriimonadaceae; g__Fimbriimonas
877ebf5c488a75719516af03871828ed	d__Bacteria; p__Proteobacteria; c__Gammaproteobacteria; o__Burkholderiales; f__Nitrosomonadaceae; g__IS-44; s__metagenome
59a9761951267cbc2705d1ad7717c337	d__Bacteria; p__Actinobacteriota; c__Acidimicrobiia; o__uncultured; f__uncultured; g__uncultured; s__uncultured_Actinomycetales
348594b1a3df9dbb0f8137844c48019e	d__Bacteria; p__Acidobacteriota; c__Acidobacteriae; o__Acidobacteriae; f__Acidobacteriae; g__Paludibaculum; s__uncultured_Acidobacteria
6657d53843d2249f74167bb6184e8f2d	d__Bacteria; p__Planctomycetota; c__Planctomycetes; o__Pirellulales; f__Pirellulaceae
91fc1d1b920527054ef536af6989070d	d__Bacteria; p__Proteobacteria; c__Gammaproteobacteria; o__Burkholderiales; f__Rhodocyclaceae
1cebf450c24f62a6da496a53e2801295	d__Archaea; p__Halobacterota; c__Methanomicrobia; o__Methanomicrobiales; f__Methanoregulaceae; g__Methanoregula; s__uncultured_archaeon
e57340c4c911b229fdd966d4dc50bc9e	d__Bacteria; p__Proteobacteria; c__Gammaproteobacteria; o__WD260; f__WD260; g__WD260; s__uncultured_bacterium
f6d42625fed3b6a2a1ee1da5405bbf0b	d__Bacteria; p__Acidobacteriota; c__Acidobacteriae
d83614905ad49d43383a664f4827fc6f	d__Bacteria; p__Bacteroidota; c__Bacteroidia; o__Bacteroidales; f__Paludibacteraceae
951f6ddbc98a7e6d1c125acf26bb6bf4	d__Bacteria; p__Acidobacteriota; c__Acidobacteriae; o__Acidobacteriales; f__Acidobacteriaceae_(Subgroup_1); g__Granulicella
531a19ef649622f5ddb5ed3110972eeb	d__Bacteria; p__Planctomycetota; c__Planctomycetes; o__Pirellulales; f__Pirellulaceae
9c95bba7967ecf495aa606b79f8c9189	d__Bacteria; p__Firmicutes; c__Bacilli; o__Bacillales; f__Bacillaceae; g__Bacillus; s__Bacillus_cohnii
9fc8d7b4ee2beb1aead0b3052ecc8972	d__Bacteria; p__Bacteroidota; c__Bacteroidia; o__Bacteroidales
1f33834761578d0aee7590df72be0a54	d__Bacteria; p__Planctomycetota; c__Phycisphaerae; o__Tepidisphaerales; f__WD2101_soil_group; g__WD2101_soil_group
4ccdbf8d87e14e042b11f3d5ac6a3caa	d__Bacteria; p__Actinobacteriota; c__Thermoleophilia; o__Solirubrobacterales; f__Solirubrobacteraceae; g__uncultured; s__uncultured_bacterium
69b8d5ef231aeb5ec73ee5a387b94b92	d__Bacteria; p__Proteobacteria; c__Gammaproteobacteria; o__Burkholderiales; f__Chromobacteriaceae; g__Paludibacterium
f2af5ad343ebe2ebba6cef9cb11595cc	d__Bacteria; p__Planctomycetota; c__Planctomycetes; o__Pirellulales; f__Pirellulaceae
d8250d4265d5b2553de2004ad37fd4a3	d__Bacteria; p__Verrucomicrobiota; c__Verrucomicrobiae; o__Opitutales; f__Opitutaceae
1d7d1d94e9b4d9ad67b439adc846d2af	d__Bacteria; p__Actinobacteriota; c__Acidimicrobiia; o__uncultured; f__uncultured; g__uncultured; s__uncultured_Actinomycetales
d4b7bfd7c9a92d980a177771916d82d4	d__Bacteria; p__Nitrospirota; c__Thermodesulfovibrionia; o__uncultured; f__uncultured; g__uncultured
16b013a780bfab7a8ff8a51de9bb2aa9	d__Bacteria; p__Planctomycetota; c__Phycisphaerae; o__Tepidisphaerales; f__WD2101_soil_group; g__WD2101_soil_group
662afff89a30fa5c1f587a61e31c62f6	d__Bacteria; p__Planctomycetota; c__Planctomycetes; o__Isosphaerales; f__Isosphaeraceae; g__Candidatus_Nostocoida; s__uncultured_planctomycete
f78b603afa573d7fa90d1b940fbf059f	d__Bacteria; p__Desulfobacterota; c__Syntrophia; o__Syntrophales; f__Smithellaceae; g__Smithella; s__uncultured_delta
3ef94502ca0afcb558a47b646f23482d	d__Bacteria; p__Proteobacteria; c__Alphaproteobacteria
18a469e1d9bea23f269173f16293bf6f	d__Bacteria; p__Acidobacteriota; c__Acidobacteriae; o__Acidobacteriales; f__Acidobacteriaceae_(Subgroup_1)
253cfc9b4bc6bc992b32485e6c1a3413	d__Bacteria; p__Actinobacteriota; c__Coriobacteriia; o__OPB41; f__OPB41; g__OPB41
3ad6449554605d038d0cfcb1dac15354	d__Archaea; p__Nanoarchaeota; c__Nanoarchaeia; o__Woesearchaeales; f__Woesearchaeales; g__Woesearchaeales; s__uncultured_euryarchaeote
81f8d1c1baaa74ef3e7d4b7391d73be5	d__Bacteria; p__Actinobacteriota; c__Acidimicrobiia; o__IMCC26256; f__IMCC26256; g__IMCC26256
ed5793e833e473b2652c181dda76f793	d__Bacteria; p__Proteobacteria; c__Alphaproteobacteria; o__Rhizobiales; f__Xanthobacteraceae; g__Bradyrhizobium
277d43c49a4dd082748c13ce2d3ed834	d__Bacteria; p__Patescibacteria; c__WWE3; o__WWE3; f__WWE3; g__WWE3; s__uncultured_anaerobic
b90ef54a33301f561fc0b90e4a24b205	d__Bacteria; p__Patescibacteria; c__Saccharimonadia; o__Saccharimonadales; f__Saccharimonadales; g__Saccharimonadales
602b6bb34870f14d3a6c76d6715d4ac9	d__Bacteria; p__Acidobacteriota; c__Acidobacteriae; o__AKIW659; f__AKIW659; g__AKIW659; s__uncultured_bacterium
e69011744f3657e7c22f2016496d4738	d__Bacteria; p__Bacteroidota; c__Ignavibacteria; o__Ignavibacteriales
85543c1850ef7aae9d1a90de925fa245	Unassigned
7f99fdc2b01cc22ae83617f7af642bfb	d__Bacteria; p__Patescibacteria; c__Parcubacteria; o__Candidatus_Nomurabacteria; f__Candidatus_Nomurabacteria; g__Candidatus_Nomurabacteria; s__uncultured_soil
23025b5f89539f3e23262c2655d5ac92	d__Bacteria; p__Planctomycetota; c__Planctomycetes; o__Isosphaerales; f__Isosphaeraceae; g__Aquisphaera; s__uncultured_bacterium
38650f10b9a10d07716a4ec5e4287d38	d__Bacteria; p__Verrucomicrobiota; c__Verrucomicrobiae; o__Methylacidiphilales; f__Methylacidiphilaceae; g__uncultured; s__uncultured_bacterium
862dea4055b5261223c581118d5bd953	d__Bacteria; p__Acidobacteriota; c__Acidobacteriae; o__Subgroup_2; f__Subgroup_2; g__Subgroup_2; s__uncultured_Holophaga
63277c56e2a433b0ea28297d37c809cf	d__Bacteria; p__Patescibacteria; c__Microgenomatia; o__Candidatus_Roizmanbacteria; f__Candidatus_Roizmanbacteria; g__Candidatus_Roizmanbacteria; s__uncultured_bacterium
3fc09255c7e07d0e44a1fede17214b78	d__Bacteria; p__Acidobacteriota; c__Acidobacteriae; o__Acidobacteriales; f__Acidobacteriaceae_(Subgroup_1)
9828017433c785d5b1904fd355e76ad3	d__Bacteria; p__Chloroflexi; c__KD4-96; o__KD4-96; f__KD4-96; g__KD4-96; s__uncultured_Chloroflexi
52456033585677aa52ee1d3eb34ebd24	d__Bacteria; p__Proteobacteria; c__Gammaproteobacteria; o__JG36-TzT-191; f__JG36-TzT-191; g__JG36-TzT-191
55fca868fe3f481d04a00e113d46f0bb	d__Bacteria; p__Planctomycetota; c__Planctomycetes; o__Gemmatales; f__Gemmataceae; g__uncultured
c6ba883bf0509e0850bf01ebcfb71c49	d__Bacteria; p__Firmicutes; c__Clostridia; o__Oscillospirales; f__Ruminococcaceae
c6cf9dca981b2e8a15d6bf67e256f429	d__Eukaryota
6611c5ddea4b638f9f38c719627bbddc	d__Bacteria; p__WPS-2; c__WPS-2; o__WPS-2; f__WPS-2; g__WPS-2; s__uncultured_bacterium
5975d9b3362d0b6ffb68f4a44ee0e55a	d__Bacteria; p__Proteobacteria; c__Alphaproteobacteria; o__Rhizobiales; f__Xanthobacteraceae; g__Bradyrhizobium
3272875475e1660998fdbb576994ef29	d__Bacteria; p__Desulfobacterota; c__Syntrophia; o__Syntrophales; f__Smithellaceae; g__Smithella
2d7b1e41818ba84b3ef5689406034421	d__Bacteria; p__Proteobacteria; c__Gammaproteobacteria; o__Burkholderiales; f__Nitrosomonadaceae; g__IS-44; s__metagenome
dd0fe995b1c7beb640659fe5a49fba80	Unassigned
f8081badf9b0057186c8cd1bfb9d814d	d__Bacteria; p__Actinobacteriota; c__Thermoleophilia; o__Gaiellales; f__uncultured; g__uncultured; s__uncultured_Solirubrobacterales
c92f8803ccf92938d079498ef0166981	d__Bacteria; p__Armatimonadota; c__uncultured; o__uncultured; f__uncultured; g__uncultured; s__uncultured_bacterium
607aef438ac1448cf7415023b3847dcd	d__Bacteria; p__Proteobacteria; c__Gammaproteobacteria; o__Enterobacterales; f__Pectobacteriaceae; g__uncultured; s__Yersinia_sp.
8da53ddc0e4b849f298ba651c8d92bd8	d__Archaea; p__Crenarchaeota; c__Bathyarchaeia; o__Bathyarchaeia; f__Bathyarchaeia; g__Bathyarchaeia
817410782e6fe39aedee36537aec1790	d__Bacteria; p__Bacteroidota; c__Bacteroidia; o__Bacteroidales; f__Prolixibacteraceae; g__BSV13; s__uncultured_Bacteroidetes
08eb2a6cc81634eb7c3794f9ba029422	d__Bacteria; p__Actinobacteriota; c__Actinobacteria; o__Frankiales; f__Acidothermaceae; g__Acidothermus
40d4d6670788b7e7334e9f9c518fc07c	d__Bacteria; p__Bacteroidota; c__Bacteroidia; o__Bacteroidales
f32ff622297ccb35dfc61a06d50659b2	d__Bacteria; p__Myxococcota; c__Polyangia; o__Haliangiales; f__Haliangiaceae; g__Haliangium; s__uncultured_proteobacterium
f60c16d0a9b22b72e2135a9ee3183618	d__Bacteria; p__Caldisericota; c__Caldisericia; o__Caldisericales; f__Caldisericaceae; g__Caldisericum; s__uncultured_bacterium
2aac39e77892bc01c73b36408464987e	d__Bacteria; p__Acidobacteriota; c__Acidobacteriae; o__Acidobacteriales; f__uncultured; g__uncultured
b102b20cee43563b1fa1ece70e427de3	d__Bacteria; p__Firmicutes; c__Negativicutes; o__Veillonellales-Selenomonadales
a3f0857fa760bcb3177a352fde748e7e	d__Bacteria; p__Acidobacteriota; c__Acidobacteriae; o__Acidobacteriales; f__Acidobacteriaceae_(Subgroup_1); g__Occallatibacter
8372d0f69cf8b935776e3f08ceac805a	d__Bacteria; p__Planctomycetota; c__Planctomycetes; o__Pirellulales; f__Pirellulaceae
c2526112d6ec846f108e60c227b77782	d__Bacteria; p__Acidobacteriota; c__Acidobacteriae; o__Acidobacteriales; f__Acidobacteriaceae_(Subgroup_1)
8c8012a5450c707544acd53f71275737	d__Bacteria; p__Firmicutes; c__Bacilli; o__Bacillales; f__Bacillaceae; g__Bacillus; s__Bacillus_cohnii
6902b0ed805971030837089e3c8efac1	d__Bacteria; p__Acidobacteriota; c__Acidobacteriae; o__Solibacterales; f__Solibacteraceae; g__Candidatus_Solibacter; s__uncultured_bacterium
d61a60098a55ec4c9df171c2352589d8	d__Bacteria; p__Actinobacteriota; c__Thermoleophilia; o__Gaiellales; f__uncultured; g__uncultured; s__uncultured_bacterium
88ed172c6cdb2651fd7b79c8f391aa47	d__Bacteria; p__Acidobacteriota; c__Acidobacteriae; o__Solibacterales; f__Solibacteraceae; g__Candidatus_Solibacter
93f410f87ac842683d5c2dd660c55b9c	d__Bacteria; p__Acidobacteriota; c__Acidobacteriae; o__Acidobacteriales; f__Acidobacteriaceae_(Subgroup_1); g__Occallatibacter
a19b8293286e9b95798528138e70a3ca	d__Bacteria; p__Verrucomicrobiota; c__Omnitrophia; o__Omnitrophales; f__Omnitrophales; g__Omnitrophales; s__uncultured_prokaryote
e59bfff27bfb8c65891033f7d091b367	d__Bacteria; p__Bacteroidota; c__Bacteroidia; o__Bacteroidales; f__Dysgonomonadaceae; g__uncultured; s__uncultured_soil
bf237eb8e76b0799415c8e87d590e3a5	d__Bacteria; p__Acidobacteriota; c__Acidobacteriae; o__Subgroup_2; f__Subgroup_2; g__Subgroup_2; s__uncultured_forest
5621f8b229b7fd90c6302a5e8414f76f	d__Bacteria; p__Acidobacteriota; c__Acidobacteriae
afb6177428490f504387178577d6baf4	d__Eukaryota; p__Nematozoa; c__Chromadorea; o__Rhabditida; f__Rhabditida; g__Rhabditida; s__Teratocephalus_lirellus
d05bb47c51b069c1afa9948ab6730655	d__Bacteria; p__Bacteroidota; c__Bacteroidia; o__Bacteroidales; f__Paludibacteraceae
abacd3a6fc2fd44cfd45dc5761395e4e	d__Bacteria; p__Acidobacteriota; c__Acidobacteriae; o__Acidobacteriales; f__Acidobacteriaceae_(Subgroup_1)
672c30925bb96a037a337dcffecb86a8	d__Bacteria; p__Proteobacteria; c__Alphaproteobacteria; o__Rhizobiales; f__Beijerinckiaceae; g__Roseiarcus; s__uncultured_bacterium
a5a3ad8a70326bef6f9051759c31d71f	d__Archaea; p__Euryarchaeota; c__Methanobacteria; o__Methanobacteriales; f__Methanobacteriaceae; g__Methanobacterium
884a4f91d4ebbc1bbd77b08a1b1f4ad3	d__Bacteria; p__Proteobacteria; c__Gammaproteobacteria; o__Burkholderiales; f__Comamonadaceae
4b0f2223edf80f6fe5649f6bd728cc21	d__Bacteria; p__Actinobacteriota; c__Actinobacteria; o__Frankiales; f__Acidothermaceae; g__Acidothermus
646be2732c424e9144debfe59620fdb6	d__Bacteria; p__Acidobacteriota; c__Acidobacteriae; o__Acidobacteriales; f__uncultured; g__uncultured; s__uncultured_bacterium
1e01dfcd6e67012d86b1e4e58a385e92	d__Archaea; p__Halobacterota; c__Methanomicrobia; o__Methanomicrobiales; f__Methanomicrobiales; g__uncultured
589679a687d0e263ac588670ba5684fa	d__Bacteria; p__Acidobacteriota; c__Acidobacteriae
c640920918387ddee076abdef20d1eb6	d__Bacteria; p__Acidobacteriota; c__Acidobacteriae; o__Subgroup_2; f__Subgroup_2; g__Subgroup_2; s__uncultured_forest
e8f13860d2049d5672466d5e3ecb5daf	d__Bacteria; p__Proteobacteria; c__Gammaproteobacteria; o__WD260; f__WD260; g__WD260; s__uncultured_bacterium
9ec6bc3bf6986bbd6992917543c111a3	d__Bacteria; p__Acidobacteriota; c__Acidobacteriae; o__Acidobacteriae; f__Acidobacteriae; g__Paludibaculum; s__uncultured_Acidobacteria
04c2b06a2eb6ea99acbb02a45beaacb1	d__Bacteria; p__Planctomycetota; c__Planctomycetes; o__Planctomycetales
e2388ec1b0dc20e2d1e955fc1971b077	d__Bacteria; p__WPS-2; c__WPS-2; o__WPS-2; f__WPS-2; g__WPS-2; s__uncultured_bacterium
d463135972362b11b34586786037cb50	d__Bacteria; p__Proteobacteria; c__Gammaproteobacteria; o__Burkholderiales; f__Nitrosomonadaceae; g__Ellin6067; s__uncultured_beta
b05e150557f78b118c8e31f4a5bbbc07	d__Bacteria; p__Planctomycetota; c__Phycisphaerae; o__Tepidisphaerales; f__WD2101_soil_group; g__WD2101_soil_group
c2a13caed273c1dfbf58189d7f591365	d__Bacteria; p__Proteobacteria; c__Gammaproteobacteria; o__Burkholderiales; f__Nitrosomonadaceae; g__GOUTA6
ab61156c45f2e607ef296a0bd92f077a	d__Bacteria; p__Patescibacteria; c__WWE3; o__WWE3; f__WWE3; g__WWE3; s__uncultured_anaerobic
e3ffae3fc6436d8d4a679b5d0ccf1a9f	d__Bacteria; p__Bacteroidota; c__Bacteroidia; o__Bacteroidales; f__Paludibacteraceae; g__Paludibacter
771563d07d0178d508c3af8be6f1cfcb	d__Bacteria; p__Bacteroidota; c__Bacteroidia; o__Bacteroidales; f__Bacteroidetes_vadinHA17; g__Bacteroidetes_vadinHA17; s__uncultured_Bacteroidales
d47bcc5c0f35268a0ffed5291f824ad7	d__Bacteria; p__Gemmatimonadota; c__Gemmatimonadetes; o__Gemmatimonadales; f__Gemmatimonadaceae; g__uncultured; s__uncultured_Gemmatimonadaceae
5dee194ef9e4326dc317b3901f786adf	d__Archaea; p__Euryarchaeota; c__Methanobacteria; o__Methanobacteriales; f__Methanobacteriaceae; g__Methanobacterium
86b829c121a45b9be38e4fe68ab79ab8	d__Bacteria; p__Actinobacteriota; c__Actinobacteria; o__Micrococcales; f__Intrasporangiaceae; g__Oryzihumus; s__uncultured_bacterium
f35a4273e15db6c9228116e451451f5f	Unassigned
69e328ae683949827a3d3d65d6864ba1	d__Bacteria; p__Bacteroidota; c__Bacteroidia; o__Bacteroidales; f__Prolixibacteraceae; g__BSV13; s__uncultured_Bacteroidetes
cacaf20ffa8884cab2e33cf7b6b2725a	d__Bacteria; p__Planctomycetota; c__Planctomycetes; o__Gemmatales; f__Gemmataceae; g__uncultured
ef490d0f1ea61c8be3c11d398419216e	d__Bacteria; p__Chloroflexi; c__Anaerolineae; o__Anaerolineales; f__Anaerolineaceae; g__Leptolinea
8cf38ef317a4bc4109775100c40434af	d__Bacteria; p__Acidobacteriota; c__Acidobacteriae; o__GOUTB8; f__GOUTB8; g__GOUTB8; s__uncultured_bacterium
f0b0c55901be8bc8cdd8eecd6b0314f2	d__Bacteria; p__Patescibacteria; c__WWE3; o__WWE3; f__WWE3; g__WWE3; s__uncultured_anaerobic
1fe372510c5129e48f9e5cb996bbc93f	d__Bacteria; p__Verrucomicrobiota; c__Verrucomicrobiae; o__Pedosphaerales; f__Pedosphaeraceae; g__ADurb.Bin063-1
ed93f03ca642c618a576192b0597ef34	d__Bacteria; p__Acidobacteriota; c__Acidobacteriae; o__Acidobacteriales; f__Acidobacteriaceae_(Subgroup_1); g__Occallatibacter
a011570f18db26b745f5cb5f201088aa	d__Bacteria; p__Proteobacteria; c__Alphaproteobacteria; o__Sphingomonadales; f__Sphingomonadaceae; g__Novosphingobium; s__Novosphingobium_tardaugens
cb4a58e40bc1f0db6da5c876f09cfee1	d__Bacteria; p__Planctomycetota; c__Planctomycetes; o__Pirellulales; f__Pirellulaceae
cb593467ced1eb53291eaddd59407a7b	d__Eukaryota
e189580f08c79749c58b0ab90521bb27	d__Bacteria; p__Bacteroidota; c__Bacteroidia; o__Bacteroidales
cae70614c10df17020ee47b214b2ed73	Unassigned
fea360d29e289b43aaaf896a5142ef5b	d__Bacteria; p__Desulfobacterota; c__Desulfuromonadia; o__Geobacterales; f__Geobacteraceae; g__Citrifermentans; s__uncultured_Geobacteraceae
15f0b23ada93fce88ba4ed81c0879cb7	d__Bacteria; p__Planctomycetota; c__Phycisphaerae; o__Tepidisphaerales; f__WD2101_soil_group; g__WD2101_soil_group
640d2d685d7bae686204a2f2c09dada9	d__Bacteria; p__Proteobacteria; c__Gammaproteobacteria; o__Burkholderiales; f__TRA3-20; g__TRA3-20; s__metagenome
c278f9d02de5cc444d694a929947fc1c	d__Bacteria; p__Myxococcota; c__Polyangia; o__Haliangiales; f__Haliangiaceae; g__Haliangium; s__uncultured_proteobacterium
eec93ed0cfeddfdcfd9564153ee8188c	d__Bacteria; p__Acidobacteriota; c__Acidobacteriae; o__Solibacterales; f__Solibacteraceae; g__Candidatus_Solibacter; s__uncultured_bacterium
e8abd2ebd9a54b38e1f17b0eab103633	Unassigned
679cd97663a03ce99ee0535bbff0700e	d__Eukaryota; p__Phragmoplastophyta; c__Embryophyta; o__Magnoliophyta; f__Magnoliophyta; g__Magnoliophyta
e858427114f519ba7a34ceef694d86b3	d__Bacteria; p__Proteobacteria; c__Gammaproteobacteria; o__Oceanospirillales
66498b8328ee2051b2a2ed20004ce538	d__Bacteria; p__Planctomycetota; c__Planctomycetes; o__Pirellulales; f__Pirellulaceae; g__uncultured; s__uncultured_bacterium
0278ab31746e800d52ee88081bf4a5fd	d__Archaea; p__Crenarchaeota; c__Nitrososphaeria; o__Group_1.1c; f__Group_1.1c; g__Group_1.1c; s__uncultured_archaeon
7ce2a66f5d1a5ddd94198abdcb35c8a2	d__Bacteria; p__Acidobacteriota; c__Acidobacteriae; o__Acidobacteriales; f__Acidobacteriaceae_(Subgroup_1); g__Occallatibacter
4616b518bb99f6b25fd9de487aa59287	d__Bacteria; p__Verrucomicrobiota; c__Verrucomicrobiae; o__Pedosphaerales; f__Pedosphaeraceae; g__uncultured
6a6477b6e7bf4046fd11d7393f08a33c	d__Bacteria; p__Verrucomicrobiota; c__Verrucomicrobiae; o__Methylacidiphilales; f__Methylacidiphilaceae; g__uncultured; s__uncultured_bacterium
c71182af3475e4a163cddcd7a4f6d602	d__Bacteria; p__Patescibacteria; c__Microgenomatia; o__Candidatus_Shapirobacteria; f__Candidatus_Shapirobacteria; g__Candidatus_Shapirobacteria; s__metagenome
09910c12d34058bf3a1c00df1c290eb5	d__Bacteria; p__Actinobacteriota
9c8f473ede598d15b038b96657c8da3b	d__Bacteria; p__Actinobacteriota; c__Coriobacteriia; o__OPB41; f__OPB41; g__OPB41
a71e142b7f8e0a08050867574cf4506c	d__Bacteria; p__Acidobacteriota; c__Acidobacteriae; o__Acidobacteriales; f__Acidobacteriaceae_(Subgroup_1); g__Telmatobacter
32a094f7427d344cc2eac5552c50a638	d__Bacteria; p__Firmicutes; c__Negativicutes; o__Veillonellales-Selenomonadales; f__Sporomusaceae; g__Pelosinus
57d2c171f0de0fcef1036b34179fdc3b	d__Bacteria; p__Patescibacteria; c__Parcubacteria; o__Candidatus_Staskawiczbacteria; f__Candidatus_Staskawiczbacteria; g__Candidatus_Staskawiczbacteria; s__uncultured_bacterium
d80b2e09350cd167d9d68889d5295fcd	d__Bacteria; p__Bacteroidota; c__Bacteroidia; o__Bacteroidales; f__Dysgonomonadaceae; g__uncultured; s__uncultured_soil
17ad6a026e7fb38607b5e4d92d018a70	d__Bacteria; p__Acidobacteriota; c__Holophagae; o__Holophagales; f__Holophagaceae; g__Geothrix
e6281d2929328b488b7670ef45c5ff30	Unassigned
84c8a33754f8fda62125ffd71e2cfdc9	d__Bacteria; p__Desulfobacterota; c__Desulfuromonadia; o__Geobacterales; f__Geobacteraceae; g__Citrifermentans; s__uncultured_Geobacteraceae
56e21999a3602434f6483cb673321abb	d__Bacteria; p__Verrucomicrobiota; c__Verrucomicrobiae; o__Pedosphaerales; f__Pedosphaeraceae; g__uncultured
261744a5533a0b780f2ef2a5af4e6cde	d__Bacteria; p__Proteobacteria; c__Gammaproteobacteria; o__Burkholderiales; f__Comamonadaceae
2096cd502e0daad24edddbff46d07a1f	d__Bacteria; p__Armatimonadota; c__Fimbriimonadia; o__Fimbriimonadales; f__Fimbriimonadaceae; g__Fimbriimonas
01524b1dffb3fb7e35c281e5884e0a92	d__Bacteria; p__Acidobacteriota; c__Acidobacteriae; o__Acidobacteriales; f__uncultured; g__uncultured
77c6879ec029092cc71bdf16b4bb679b	d__Eukaryota; p__Apicomplexa; c__Conoidasida; o__Gregarinasina; f__Eugregarinorida; g__Eugregarinorida
7bd1adb9e2ba2129c36968ede79486a5	d__Bacteria; p__Desulfobacterota; c__Desulfuromonadia; o__Geobacterales; f__Geobacteraceae
4e9b3ee6e72a7341a4a4ea2cb7c8ff34	d__Bacteria; p__Proteobacteria; c__Alphaproteobacteria; o__Rhizobiales; f__Xanthobacteraceae; g__uncultured
05ca3d8df3f5ad189bc99c4269854e01	d__Bacteria; p__Actinobacteriota; c__Thermoleophilia; o__Solirubrobacterales; f__Solirubrobacteraceae; g__uncultured
c7e63a512c1460c2e6d0a7793e1c0fa7	d__Bacteria; p__Chloroflexi; c__AD3; o__AD3; f__AD3; g__AD3; s__uncultured_Thermoflavimicrobium
91a86e7a4021f799bd52491550e1c6c8	d__Bacteria; p__Acidobacteriota; c__Acidobacteriae; o__Subgroup_2; f__Subgroup_2; g__Subgroup_2; s__uncultured_forest
65c68176b055e7db69e876cf30b19b45	d__Bacteria; p__Verrucomicrobiota; c__Verrucomicrobiae; o__Opitutales; f__Opitutaceae; g__uncultured; s__uncultured_bacterium
43d00f9487a778e582a85e3f215173b5	d__Bacteria; p__Methylomirabilota; c__Methylomirabilia; o__Methylomirabilales; f__Methylomirabilaceae; g__Sh765B-TzT-35; s__uncultured_bacterium
d956baf0d7e016750195cb51361c828e	d__Bacteria; p__Patescibacteria; c__Saccharimonadia; o__Saccharimonadales; f__Saccharimonadales; g__Saccharimonadales; s__uncultured_bacterium
2cbc59327b152619c22333ab6a0497d0	d__Bacteria; p__Patescibacteria; c__Saccharimonadia; o__Saccharimonadales; f__Saccharimonadales; g__Saccharimonadales; s__uncultured_bacterium
e28c35548bbb7f46e1fabcb5c41106c7	d__Bacteria; p__Actinobacteriota; c__Actinobacteria
0e4889029bb9f13810ee3586fa238b83	d__Bacteria; p__Actinobacteriota; c__Thermoleophilia; o__Gaiellales; f__uncultured; g__uncultured
ca8a6e62270d826e67214b8e780fa2c7	d__Bacteria; p__Bacteroidota; c__Bacteroidia; o__Sphingobacteriales; f__Lentimicrobiaceae; g__Lentimicrobiaceae; s__uncultured_bacterium
55ccfb53cffabe6c939e2ab5b119732f	d__Bacteria; p__Proteobacteria; c__Alphaproteobacteria; o__Rhizobiales; f__Xanthobacteraceae; g__Bradyrhizobium; s__Bradyrhizobium_canariense
a456fd414354ed2afccb89a873ace435	Unassigned
2077a1a819e04c11fde4c89def5d1060	d__Bacteria; p__Acidobacteriota; c__Acidobacteriae; o__Acidobacteriales; f__Acidobacteriaceae_(Subgroup_1); g__Occallatibacter
bf00fb7bd441d1b2e0244f3529cb84da	d__Bacteria; p__Bacteroidota; c__Bacteroidia; o__Sphingobacteriales; f__Lentimicrobiaceae; g__Lentimicrobiaceae; s__uncultured_bacterium
6e24a176a44deffcfabc3d1e10dcad59	d__Bacteria; p__Planctomycetota; c__Planctomycetes; o__Isosphaerales; f__Isosphaeraceae
6ccfbe513f6919ec4802f6c5cb227325	d__Bacteria; p__Actinobacteriota; c__Acidimicrobiia; o__uncultured; f__uncultured; g__uncultured; s__uncultured_Actinomycetales
c5e90dd60c32caf2b8af45f6376f029b	d__Bacteria; p__Patescibacteria; c__Gracilibacteria; o__Candidatus_Peregrinibacteria; f__Candidatus_Peregrinibacteria; g__Candidatus_Peregrinibacteria; s__uncultured_bacterium
6df59352ebe7b0ac108b94b081fd175c	d__Bacteria; p__Actinobacteriota; c__Actinobacteria; o__Propionibacteriales; f__Propionibacteriaceae; g__Aestuariimicrobium; s__uncultured_bacterium
87778b6c1069e6ed148cc638a4d8c08c	d__Bacteria; p__Verrucomicrobiota; c__Verrucomicrobiae; o__Opitutales; f__Opitutaceae
591c67a986cf984bbd7dbfda937cc018	d__Bacteria; p__Patescibacteria; c__Berkelbacteria; o__Berkelbacteria; f__Berkelbacteria; g__Berkelbacteria; s__candidate_division
3813a04fb13201b0a1266fadd332404b	d__Bacteria; p__Planctomycetota; c__Planctomycetes; o__Pirellulales; f__Pirellulaceae; g__uncultured; s__uncultured_planctomycete
372cd8b92acf072654a8abf4765f2e80	d__Bacteria; p__Acidobacteriota; c__Acidobacteriae; o__Acidobacteriales; f__uncultured; g__uncultured; s__uncultured_bacterium
409bb5731989a1c264bbc1eae3ddeac7	d__Bacteria; p__WPS-2; c__WPS-2; o__WPS-2; f__WPS-2; g__WPS-2; s__uncultured_bacterium
d96dc975b698a4e85fafcb75bfb18293	d__Bacteria; p__Acidobacteriota; c__Acidobacteriae; o__Subgroup_2; f__Subgroup_2; g__Subgroup_2
5011d3a3592ca4689160c942c85c31a4	d__Bacteria; p__Proteobacteria; c__Alphaproteobacteria; o__Rhizobiales; f__Xanthobacteraceae; g__Pseudolabrys
cf3bf9d5e6777e35f87d94b64cf01527	d__Bacteria; p__Proteobacteria; c__Alphaproteobacteria; o__Elsterales; f__uncultured; g__uncultured; s__uncultured_bacterium
3b3d6ccd796024650e40185780a6401d	d__Bacteria; p__Actinobacteriota; c__Actinobacteria; o__Frankiales; f__Acidothermaceae; g__Acidothermus
5e792c7249687b8391105bd7acbd90a4	d__Bacteria; p__Actinobacteriota; c__Thermoleophilia; o__Gaiellales; f__uncultured; g__uncultured
4da4cf066cbd905eecdad250b5917c60	d__Bacteria; p__Proteobacteria; c__Gammaproteobacteria; o__WD260; f__WD260; g__WD260; s__uncultured_bacterium
f3a6705a83e67821150f000dd05ef9b4	d__Bacteria; p__Bacteroidota; c__Bacteroidia; o__Bacteroidales; f__Rikenellaceae; g__uncultured
c9fca95cf328b0e471744e3bf629ffa3	d__Bacteria; p__Actinobacteriota; c__Thermoleophilia; o__Solirubrobacterales; f__Solirubrobacteraceae; g__Conexibacter
c9658cdb08e25915e7eec81331fa00f8	d__Eukaryota; p__Ciliophora; c__Intramacronucleata; o__Conthreep; f__Oligohymenophorea
00485cfef14138817144520a2ada10b0	d__Archaea; p__Crenarchaeota; c__Bathyarchaeia; o__Bathyarchaeia; f__Bathyarchaeia; g__Bathyarchaeia
b7b996daa9a6cdfaf92bb09252c563a1	d__Bacteria; p__Proteobacteria; c__Alphaproteobacteria; o__Micropepsales; f__Micropepsaceae
81e150db6908c37f0f5bc76f7504429d	d__Bacteria; p__Actinobacteriota; c__Thermoleophilia; o__Solirubrobacterales; f__Solirubrobacteraceae; g__Conexibacter
c299aab8eb28f0763eb72c9482e8bb10	d__Bacteria; p__Bacteroidota; c__Bacteroidia; o__Bacteroidales; f__Prolixibacteraceae; g__WCHB1-32; s__uncultured_Prolixibacter
01b4044ffaecd893b9a514b448c236b1	d__Bacteria; p__Acidobacteriota; c__Acidobacteriae; o__Acidobacteriales; f__Acidobacteriaceae_(Subgroup_1); g__Granulicella
73d50052898bbe411977875dd2e1f0bc	d__Bacteria; p__Actinobacteriota; c__Thermoleophilia; o__Solirubrobacterales; f__Solirubrobacteraceae; g__Conexibacter
c9cacfa089de3eae07c192af462b654a	d__Bacteria; p__Patescibacteria; c__Parcubacteria; o__Parcubacteria; f__Parcubacteria; g__Parcubacteria; s__uncultured_bacterium
152d7ddbb13ffee441975f2af5b0c49b	d__Bacteria; p__Acidobacteriota; c__Holophagae; o__Holophagales; f__Holophagaceae; g__Geothrix
2439cbb3b8f249b43dbc616c11618bb5	Unassigned
b1c3fdcdbf1e16c6f73f0a1b5c27bea1	d__Bacteria; p__Acidobacteriota; c__Acidobacteriae; o__Solibacterales; f__Solibacteraceae; g__Candidatus_Solibacter
c0f22a70036347bc2bc3628bae05cd5b	d__Bacteria; p__Proteobacteria; c__Alphaproteobacteria
7a772ac0976d4b9ecbcd2f874c97de17	d__Bacteria; p__Planctomycetota; c__Planctomycetes; o__Pirellulales; f__Pirellulaceae
2bb8c9b94eb87f1cc3e946ed7d508628	d__Eukaryota; p__Phragmoplastophyta; c__Embryophyta; o__Magnoliophyta; f__Magnoliophyta; g__Magnoliophyta
d3f9b4ed61edde2f4910d24e7847ea5a	d__Bacteria; p__Actinobacteriota; c__Coriobacteriia; o__OPB41; f__OPB41; g__OPB41
7793a5fc31614af24a1923840ab2bdf8	d__Bacteria; p__Actinobacteriota; c__Thermoleophilia; o__Solirubrobacterales; f__Solirubrobacteraceae
e33f4d56f2ba5d1d722b6b4b46b6a0d0	d__Bacteria; p__Proteobacteria; c__Alphaproteobacteria; o__Rhizobiales; f__Xanthobacteraceae; g__Pseudolabrys
f8e9e7a48c3b660d06760d96687cc4a7	d__Archaea; p__Halobacterota; c__Methanomicrobia; o__Methanomicrobiales; f__Methanomicrobiales; g__uncultured
3db6d8a979c93770fa06762fcb982844	d__Bacteria; p__Acidobacteriota; c__Acidobacteriae; o__Solibacterales; f__Solibacteraceae; g__Candidatus_Solibacter
76ee9bbcfbff1f0cb8688a01963fa8ae	d__Bacteria; p__Verrucomicrobiota; c__Verrucomicrobiae; o__Opitutales; f__Opitutaceae; g__uncultured; s__uncultured_bacterium
5191b34def3476fef3fd091ef80f53b9	d__Bacteria; p__Chloroflexi; c__Dehalococcoidia; o__RBG-13-46-9; f__RBG-13-46-9; g__RBG-13-46-9; s__uncultured_bacterium
45f3e9f6e9e8f6e511d847edd3a115fa	d__Bacteria; p__Actinobacteriota; c__Acidimicrobiia; o__uncultured; f__uncultured; g__uncultured
2435fb9aafaa0b48f8f208961a2883ca	d__Bacteria; p__Patescibacteria; c__Parcubacteria; o__Parcubacteria; f__Parcubacteria; g__Parcubacteria; s__uncultured_bacterium
a876d0e7e694d23d54abe455459150df	d__Bacteria; p__Planctomycetota; c__Phycisphaerae; o__Tepidisphaerales; f__WD2101_soil_group; g__WD2101_soil_group
7f430d24c1202615333aee979e1a650a	d__Bacteria; p__Actinobacteriota; c__Thermoleophilia; o__Solirubrobacterales; f__Solirubrobacteraceae; g__Conexibacter
ee385e7095da0e72f8e6fe4a8689bbef	d__Bacteria; p__Fibrobacterota; c__Fibrobacteria; o__Fibrobacterales; f__B122; g__B122; s__uncultured_bacterium
faeb47a1f487023cf75bad976645c991	d__Bacteria; p__Desulfobacterota; c__Desulfuromonadia; o__Geobacterales; f__Geobacteraceae; g__Trichlorobacter
a39d6ffd2a065a04a68a2b5198db2feb	d__Bacteria; p__Acidobacteriota; c__Acidobacteriae; o__AKIW659; f__AKIW659; g__AKIW659; s__uncultured_bacterium
b34db24b15ab03cd0d64ebfd49b9aee5	d__Bacteria; p__Acidobacteriota; c__Acidobacteriae; o__Acidobacteriales; f__Acidobacteriaceae_(Subgroup_1); g__Occallatibacter
bed31806a058f728cf85dcec68d81c9a	d__Bacteria; p__Verrucomicrobiota; c__Omnitrophia; o__Omnitrophales; f__Omnitrophales; g__Omnitrophales; s__uncultured_prokaryote
1024ab1ea96393babd69991076557b94	d__Bacteria; p__Proteobacteria; c__Alphaproteobacteria; o__Rhizobiales; f__Beijerinckiaceae; g__Roseiarcus; s__uncultured_bacterium
16c25773dc1ea090d42eb68a8320cb10	d__Bacteria; p__Patescibacteria; c__Microgenomatia; o__Candidatus_Levybacteria; f__Candidatus_Levybacteria; g__Candidatus_Levybacteria; s__uncultured_bacterium
549fb5e6ed9398516786f04f183aab2b	d__Bacteria; p__Acidobacteriota; c__Acidobacteriae; o__Acidobacteriales; f__Acidobacteriaceae_(Subgroup_1); g__Occallatibacter
c7b5a20ac0aae74fef753e70adf69f70	d__Bacteria; p__Actinobacteriota; c__Thermoleophilia; o__Solirubrobacterales; f__Solirubrobacteraceae; g__Conexibacter; s__uncultured_Conexibacteraceae
48a709bd59776012ec9aecb8d3483842	d__Bacteria; p__Proteobacteria; c__Gammaproteobacteria; o__Burkholderiales; f__Gallionellaceae; g__Sideroxydans
a5568d52a03b32ac05ac62a26fe1401a	d__Bacteria; p__Proteobacteria; c__Alphaproteobacteria; o__Rhizobiales; f__Xanthobacteraceae; g__Bradyrhizobium
e77c8bfb70565cb921927e98c69500ed	d__Bacteria; p__Patescibacteria; c__Parcubacteria; o__Parcubacteria; f__Parcubacteria; g__Parcubacteria; s__uncultured_bacterium
66c140a258626c44cb7520f91e0e5754	d__Bacteria; p__Bacteroidota; c__Bacteroidia; o__Bacteroidales; f__Dysgonomonadaceae; g__uncultured; s__uncultured_soil
2e2dafec99d0c0c5ee926319a387e736	d__Bacteria; p__Proteobacteria; c__Alphaproteobacteria
f5a9042dad147a0742c0a565be06a8fe	d__Bacteria; p__Bacteroidota; c__Bacteroidia; o__Bacteroidales; f__Prolixibacteraceae; g__WCHB1-32; s__uncultured_Prolixibacter
06a1a532f53b480de136abd83ea501ee	d__Bacteria; p__Acidobacteriota; c__Acidobacteriae; o__Acidobacteriales; f__Acidobacteriaceae_(Subgroup_1)
e4bf08c377ba2fcdef0b5375b4b850ec	d__Bacteria; p__Proteobacteria; c__Alphaproteobacteria; o__Rhizobiales; f__Xanthobacteraceae
23f332041082b2d0839798fa2d6fdd2f	d__Bacteria; p__Planctomycetota; c__Phycisphaerae; o__Tepidisphaerales; f__CPla-3_termite_group; g__CPla-3_termite_group; s__metagenome
36d33e1811093bbef92fe9d80bd176be	d__Bacteria; p__Acidobacteriota; c__Acidobacteriae; o__Subgroup_2; f__Subgroup_2; g__Subgroup_2; s__uncultured_forest
c9a09f4fce18188181e6ded2f8aaaad7	d__Bacteria; p__Planctomycetota; c__Planctomycetes; o__Pirellulales; f__Pirellulaceae; g__uncultured
bd8fca3e7948dd80d60444ca0ce7746e	d__Bacteria; p__Bacteroidota; c__Bacteroidia; o__Bacteroidales
ece82e6a7b6a596631fa63aef0250274	d__Bacteria; p__Bacteroidota; c__Bacteroidia; o__Bacteroidales
45d3559a02e8d816faca3cea5f73bbc4	d__Archaea; p__Crenarchaeota; c__Bathyarchaeia; o__Bathyarchaeia; f__Bathyarchaeia; g__Bathyarchaeia
2b5b3d9b3a148240701308c993edd57f	d__Bacteria; p__Patescibacteria; c__Parcubacteria; o__Parcubacteria; f__Parcubacteria; g__Parcubacteria; s__uncultured_bacterium
fb715c8c29afdc38207e001884a65787	d__Bacteria; p__Acidobacteriota; c__Acidobacteriae; o__Acidobacteriales; f__Acidobacteriaceae_(Subgroup_1)
7cbb6c18f000c0c0dce2c3cea4e8b61e	d__Bacteria; p__Bacteroidota; c__Bacteroidia; o__Bacteroidales
10ec5afa70e1cacd2c90b7a43cff7172	d__Bacteria; p__Proteobacteria; c__Gammaproteobacteria; o__JG36-TzT-191; f__JG36-TzT-191; g__JG36-TzT-191
bc7f2787cf25826dd471f70a28fe1d63	d__Bacteria; p__Patescibacteria; c__Saccharimonadia; o__Saccharimonadales; f__Saccharimonadales; g__Saccharimonadales; s__uncultured_bacterium
0de97fe9c40305c487e3d3022881245e	d__Bacteria; p__Patescibacteria; c__Parcubacteria; o__Candidatus_Nomurabacteria; f__Candidatus_Nomurabacteria; g__Candidatus_Nomurabacteria; s__uncultured_soil
c3b3d01590b81f2cddea31f0af3da9fb	d__Bacteria; p__Actinobacteriota; c__Acidimicrobiia; o__IMCC26256; f__IMCC26256; g__IMCC26256
bb2efbc46e5ffd14c4d7f3e4d5cb3a7c	d__Bacteria; p__Patescibacteria; c__Microgenomatia; o__Candidatus_Levybacteria; f__Candidatus_Levybacteria; g__Candidatus_Levybacteria; s__uncultured_bacterium
df1e3ff643aa808e854c424ffca246be	d__Bacteria; p__Desulfobacterota; c__Desulfuromonadia; o__Geobacterales; f__Geobacteraceae
c34ae79a2a9f32eb45df1ed0424e28f2	d__Bacteria; p__Bacteroidota; c__Bacteroidia; o__Bacteroidales; f__Paludibacteraceae; g__uncultured
24600dce9e508b7493a1233fb0d2e193	d__Bacteria; p__Acidobacteriota; c__Acidobacteriae; o__AKIW659; f__AKIW659; g__AKIW659; s__uncultured_bacterium
d76a482644dc11467b6da63f85f6f9fa	d__Bacteria; p__Bacteroidota; c__Bacteroidia; o__Bacteroidales
523985589e8fe636641131a18bccc64c	d__Bacteria; p__Acidobacteriota; c__Acidobacteriae; o__Subgroup_2; f__Subgroup_2; g__Subgroup_2
7239eac184ef6d1c2099fed8d7634657	d__Bacteria; p__Planctomycetota; c__Phycisphaerae; o__Tepidisphaerales; f__WD2101_soil_group; g__WD2101_soil_group
7c7fb5e61085bdef618abd7820cf62bc	d__Bacteria; p__Firmicutes; c__Negativicutes; o__Veillonellales-Selenomonadales; f__Sporomusaceae; g__uncultured; s__uncultured_Firmicutes
f34037d8c8f121f3122e55e8c051448c	Unassigned
2417e810cfe329c216eb64d960c8e162	d__Bacteria; p__Firmicutes; c__Clostridia; o__Oscillospirales; f__Ruminococcaceae
30a282d9af355cdd7e93e4c09b2247e6	Unassigned
6a52d0988d49303557dccd1acbae78f4	d__Bacteria; p__Bacteroidota; c__Bacteroidia; o__Bacteroidales; f__Prolixibacteraceae; g__BSV13
f42398fc84fd4a8e96287b64e57f5e2d	d__Bacteria; p__Proteobacteria; c__Alphaproteobacteria; o__Rhizobiales; f__Beijerinckiaceae; g__Rhodoblastus; s__Rhodoblastus_sphagnicola
78e467ef1777804f8d42d59b4e5544fe	d__Bacteria; p__Chloroflexi; c__AD3; o__AD3; f__AD3; g__AD3
53ae8ae25aff64f2b75401a0d3e59f86	d__Bacteria; p__Spirochaetota; c__Spirochaetia; o__Spirochaetales; f__Spirochaetaceae; g__Spirochaeta; s__uncultured_bacterium
09015419c0d6d74123cdb8378c78e47b	d__Bacteria; p__Proteobacteria; c__Gammaproteobacteria; o__Burkholderiales
cfe4ddc179deb466cc416ed8f50b8d68	d__Bacteria; p__Bacteroidota; c__Bacteroidia; o__Bacteroidales; f__Paludibacteraceae
81b80786e0b64d20866ab51166373349	d__Bacteria; p__Proteobacteria; c__Gammaproteobacteria; o__Burkholderiales; f__TRA3-20; g__TRA3-20; s__metagenome
820e93e963d1af0cce256e50e356f11a	d__Bacteria; p__Chloroflexi; c__KD4-96; o__KD4-96; f__KD4-96; g__KD4-96
0d5aa10179994ead51dae6351d2e4809	d__Bacteria; p__Planctomycetota; c__Phycisphaerae; o__Phycisphaerales; f__AKAU3564_sediment_group; g__AKAU3564_sediment_group; s__uncultured_organism
bd3d89a04b5ebff00c8a302848a9c165	d__Bacteria; p__Proteobacteria; c__Alphaproteobacteria; o__Acetobacterales; f__Acetobacteraceae; g__uncultured; s__metagenome
bb8ebc7af91b5c464ede28ce1e86bcb2	d__Bacteria; p__Proteobacteria; c__Gammaproteobacteria
501a0b64816dfc217b4db7b7db60ceb0	d__Bacteria; p__Acidobacteriota; c__Acidobacteriae; o__Acidobacteriales; f__Acidobacteriaceae_(Subgroup_1); g__Granulicella
bd6732360caac6c5a01ede3ef2d47e19	d__Bacteria; p__Bacteroidota; c__Bacteroidia; o__Bacteroidales; f__Prevotellaceae; g__Prevotella
0e09047b65d08afc05b505b3954da261	d__Bacteria; p__Firmicutes; c__Negativicutes; o__Veillonellales-Selenomonadales
c5eea431e05db4f826ded946d03de72b	d__Bacteria; p__Chloroflexi; c__Dehalococcoidia; o__RBG-13-46-9; f__RBG-13-46-9; g__RBG-13-46-9; s__uncultured_bacterium
4dea9957afdb9ccc6588eac2d05c6f7e	d__Bacteria; p__Planctomycetota; c__Planctomycetes; o__Pirellulales; f__Pirellulaceae; g__Pir1_lineage
ee297d90da9da80e273cabd86067ac4a	d__Bacteria; p__Patescibacteria; c__Microgenomatia; o__Candidatus_Shapirobacteria; f__Candidatus_Shapirobacteria; g__Candidatus_Shapirobacteria; s__uncultured_eubacterium
bcd1078198c2d7a22901d86f90e67fc9	d__Bacteria; p__Planctomycetota; c__Planctomycetes; o__Pirellulales; f__Pirellulaceae; g__uncultured
66a120763ed085896d10e250399a4f67	d__Bacteria; p__Planctomycetota; c__Planctomycetes; o__Isosphaerales; f__Isosphaeraceae; g__Aquisphaera
f26e2305e91eeca04b346b26246054f3	Unassigned
6a8e64db4052aa30b49080a9dab70f3b	d__Bacteria; p__Desulfobacterota; c__Syntrophia; o__Syntrophales; f__Smithellaceae; g__Smithella; s__uncultured_bacterium
2b1ba116ca8469c8b7a75dee7b76c5f5	d__Bacteria; p__Planctomycetota; c__Planctomycetes; o__Pirellulales; f__Pirellulaceae; g__uncultured
9de3f8f6efeef229bd4a4e12b04b7075	d__Bacteria; p__Actinobacteriota; c__Thermoleophilia; o__Solirubrobacterales; f__Solirubrobacteraceae; g__Conexibacter
25014aa483efe88f69fbedb0983e2bdb	d__Bacteria; p__Proteobacteria; c__Alphaproteobacteria; o__Rhodospirillales; f__uncultured; g__uncultured
8b05a98b9eb823e2bb91eff2edd97f6b	d__Bacteria; p__Bacteroidota; c__Kryptonia; o__Kryptoniales; f__BSV26; g__BSV26
0abb62d091620a47cd15e7c969480883	Unassigned
e5bab4745fcf411002261e7d33797e8c	d__Bacteria; p__Fibrobacterota; c__Fibrobacteria; o__Fibrobacterales; f__Fibrobacteraceae; g__uncultured; s__metagenome
ef5d082f4916f7ade364379eb410d30a	d__Bacteria; p__Acidobacteriota; c__Acidobacteriae; o__Solibacterales; f__Solibacteraceae; g__Candidatus_Solibacter
caebe501e7f3542736210815ab373932	d__Bacteria; p__Proteobacteria; c__Alphaproteobacteria; o__Rhizobiales; f__Xanthobacteraceae; g__Bradyrhizobium
4beb9ab1fb405d80ae024345a888544d	d__Bacteria; p__Bacteroidota; c__Bacteroidia; o__Bacteroidales; f__Prolixibacteraceae; g__BSV13; s__uncultured_bacterium
614ce978962c824e65f046861171047b	d__Eukaryota; p__Apicomplexa; c__Conoidasida; o__Gregarinasina; f__Eugregarinorida; g__Eugregarinorida
2933c27287056c95261e34b2d504341f	d__Bacteria; p__Firmicutes; c__Negativicutes; o__Veillonellales-Selenomonadales; f__Sporomusaceae; g__uncultured
a5d4ba60552cf51216b07a7d14c3f484	d__Bacteria; p__Desulfobacterota; c__Desulfuromonadia; o__Geobacterales; f__Geobacteraceae
1f451962e4e16b689e582094b7252f35	d__Eukaryota; p__Ascomycota; c__Leotiomycetes; o__Helotiales
e5abacfeeb8481ca7e552e819cbd3f35	d__Bacteria; p__Bacteroidota; c__Bacteroidia; o__Bacteroidales; f__Prolixibacteraceae; g__BSV13; s__uncultured_bacterium
a1b1409291753c82da29d8cc17b3d312	d__Bacteria; p__Patescibacteria; c__Microgenomatia; o__Candidatus_Levybacteria; f__Candidatus_Levybacteria; g__Candidatus_Levybacteria; s__uncultured_bacterium
27b8aa4964997877a66a69f5bd4960a8	d__Bacteria; p__Spirochaetota; c__Spirochaetia; o__Spirochaetales; f__Spirochaetaceae; g__uncultured; s__uncultured_bacterium
722a6499c453938f490161aa9676f089	d__Bacteria; p__Planctomycetota; c__Planctomycetes; o__Isosphaerales; f__Isosphaeraceae; g__Aquisphaera
1e30a9a14c332beab5ffed750e05e2ba	d__Bacteria; p__Proteobacteria; c__Gammaproteobacteria; o__WD260; f__WD260; g__WD260; s__uncultured_bacterium
c9f37542f02790709be6d040d396d742	d__Bacteria; p__Bacteroidota; c__Bacteroidia; o__Bacteroidales; f__Prolixibacteraceae; g__BSV13; s__uncultured_bacterium
ef6c9cc62f98ec36ef6485844b44b930	d__Bacteria; p__Acidobacteriota; c__Acidobacteriae; o__Acidobacteriales; f__Acidobacteriaceae_(Subgroup_1)
05fff85197c95e7fe5565d36c0841c53	d__Bacteria; p__Acidobacteriota; c__Acidobacteriae; o__Acidobacteriales; f__Acidobacteriaceae_(Subgroup_1); g__Acidipila; s__uncultured_bacterium
7d533a7ec28ff53b5002c3f4ed958f8b	d__Bacteria; p__Patescibacteria; c__Parcubacteria; o__Candidatus_Staskawiczbacteria; f__Candidatus_Staskawiczbacteria; g__Candidatus_Staskawiczbacteria; s__uncultured_bacterium
2cf2099f67b5131171503b32da0e9c13	d__Bacteria
044458f3ecc52b89f463fe801edbfde6	d__Bacteria; p__Spirochaetota; c__Spirochaetia; o__Spirochaetales; f__Spirochaetaceae; g__Spirochaeta; s__uncultured_bacterium
13c799adfb814e3f4e3e62db716cebdb	d__Archaea; p__Halobacterota; c__Methanomicrobia; o__Methanomicrobiales; f__Methanoregulaceae; g__Methanoregula
a931f0cafab59df27adfc7a475036216	d__Bacteria; p__Acidobacteriota; c__Acidobacteriae; o__Acidobacteriales; f__Acidobacteriaceae_(Subgroup_1); g__Acidobacteriaceae_(Subgroup_1); s__uncultured_bacterium
e9e026ed1ada045d61275a09cb2d10df	d__Bacteria; p__Proteobacteria; c__Alphaproteobacteria; o__Sphingomonadales; f__Sphingomonadaceae; g__Novosphingobium; s__Novosphingobium_tardaugens
9630471c95e02c95a249b8f43060437d	d__Bacteria; p__Gemmatimonadota; c__Gemmatimonadetes; o__Gemmatimonadales; f__Gemmatimonadaceae; g__uncultured; s__uncultured_Gemmatimonadaceae
88fe7913c421c960f3b99c3541ed0410	d__Bacteria; p__Proteobacteria; c__Gammaproteobacteria; o__Xanthomonadales; f__Rhodanobacteraceae
aa2cdafe1526ee2e02ab3b6cbfbdd69d	d__Bacteria; p__Elusimicrobiota; c__Lineage_IIa; o__Lineage_IIa; f__Lineage_IIa; g__Lineage_IIa
63f3018989f62503c4fe896399c7c7b2	Unassigned
d2011338539e83a0ce47bce0260507d3	d__Bacteria; p__Verrucomicrobiota; c__Verrucomicrobiae; o__Pedosphaerales; f__Pedosphaeraceae; g__Ellin516; s__uncultured_bacterium
a2b8f0239b2d3c3183f7cc56897c4a51	d__Bacteria; p__Acidobacteriota; c__Acidobacteriae; o__Acidobacteriales; f__Acidobacteriaceae_(Subgroup_1); g__Occallatibacter
c8c3ee2c50426b07ab888dca4ff64b7f	d__Bacteria; p__Bacteroidota; c__Bacteroidia; o__Bacteroidales; f__Prolixibacteraceae
e367677fe1c3a819a1c42e4b2d332b5b	d__Bacteria; p__Desulfobacterota; c__Syntrophia; o__Syntrophales; f__Smithellaceae; g__Smithella; s__uncultured_delta
1b25ff7264119fbf3b0ac6c791f9c4f9	d__Bacteria; p__Nitrospirota; c__Thermodesulfovibrionia; o__uncultured; f__uncultured; g__uncultured
bdd20808e2c4a9ba0c0ecaeb36fa337a	d__Bacteria; p__Bacteroidota; c__Ignavibacteria; o__Ignavibacteriales
d4df4ddd66a8d288dab7999afb6e043b	d__Bacteria; p__Acidobacteriota; c__Acidobacteriae; o__Subgroup_2; f__Subgroup_2; g__Subgroup_2; s__uncultured_forest
8c5c83d3aeac5e70f650848d8e545bd7	d__Bacteria; p__Proteobacteria; c__Alphaproteobacteria; o__Acetobacterales; f__Acetobacteraceae; g__Rhodovastum; s__metagenome
7406b03ccc51260641307b8b6e417964	d__Bacteria; p__Acidobacteriota; c__Acidobacteriae; o__Subgroup_2; f__Subgroup_2; g__Subgroup_2; s__uncultured_forest
80deba047633b4be37adbebc996d718e	d__Bacteria; p__Acidobacteriota; c__Acidobacteriae; o__Subgroup_2; f__Subgroup_2; g__Subgroup_2
a9654e12ff65742d740d627e6670dadc	d__Bacteria; p__Bacteroidota; c__Bacteroidia; o__Bacteroidales; f__Dysgonomonadaceae; g__uncultured; s__metagenome
23e325b9717dc4898d641631bcdc588d	d__Bacteria; p__Acidobacteriota; c__Acidobacteriae; o__Subgroup_2; f__Subgroup_2; g__Subgroup_2; s__uncultured_Acidobacteria
40300df1992cf5702080127521d7fcd7	d__Bacteria; p__Actinobacteriota; c__Acidimicrobiia; o__uncultured; f__uncultured; g__uncultured; s__uncultured_forest
7b04d0dabb030a3b8a657712f2a6d127	d__Bacteria; p__Acidobacteriota; c__Acidobacteriae; o__Acidobacteriae; f__Acidobacteriae; g__Paludibaculum; s__uncultured_Acidobacteria
99914521b4a6d499840401cb5f159402	d__Bacteria; p__Acidobacteriota; c__Acidobacteriae; o__Subgroup_2; f__Subgroup_2; g__Subgroup_2; s__uncultured_forest
d6dc2c05900c2658514d6162140c71c3	d__Bacteria; p__Acidobacteriota; c__Acidobacteriae; o__Solibacterales; f__Solibacteraceae; g__Candidatus_Solibacter
3da30d15b9d2725eb8a32801e8f3e463	d__Bacteria; p__Chloroflexi; c__KD4-96; o__KD4-96; f__KD4-96; g__KD4-96
eb1700211f0f1d87c43cc92538d05cdc	d__Bacteria; p__Proteobacteria; c__Gammaproteobacteria; o__Burkholderiales; f__Chromobacteriaceae; g__Paludibacterium; s__uncultured_bacterium
4c4318952d17777972125ab1bd373ac2	d__Bacteria; p__Bacteroidota; c__Bacteroidia; o__Bacteroidales; f__Bacteroidetes_vadinHA17; g__Bacteroidetes_vadinHA17
3b7b5303b25866f7acc8031acf89993b	d__Bacteria; p__Verrucomicrobiota; c__Omnitrophia; o__Omnitrophales; f__Omnitrophaceae; g__Candidatus_Omnitrophus
3c1f388b8dcdf5c2687373aea2c2511a	d__Bacteria; p__Patescibacteria; c__Parcubacteria; o__Candidatus_Staskawiczbacteria; f__Candidatus_Staskawiczbacteria; g__Candidatus_Staskawiczbacteria; s__uncultured_bacterium
ca8bd3a61fe6e7d17cf62110d5f7cb82	d__Bacteria; p__Firmicutes; c__Negativicutes; o__Veillonellales-Selenomonadales
0a99a9d40bcea172ca92bf09dae034e7	d__Bacteria; p__Proteobacteria; c__Gammaproteobacteria; o__Burkholderiales; f__Chromobacteriaceae; g__Paludibacterium; s__uncultured_bacterium
a3ba9016837a15592ca902f35c6e6c0d	d__Bacteria; p__Verrucomicrobiota; c__Verrucomicrobiae; o__Pedosphaerales; f__Pedosphaeraceae; g__Pedosphaeraceae
d594fd868894c85c41e5e8ef9d500f06	d__Bacteria; p__Acidobacteriota; c__Acidobacteriae; o__Subgroup_2; f__Subgroup_2; g__Subgroup_2; s__uncultured_forest
f46d1b84b61f0e04f7c8bf1ae859c3fc	d__Bacteria; p__Proteobacteria; c__Gammaproteobacteria; o__Burkholderiales
a9d0b326394e2ecaf01f9baa041e0dbe	d__Bacteria; p__Firmicutes; c__Negativicutes; o__Veillonellales-Selenomonadales
fea9e8116d3449e13e7261b9165645cf	d__Bacteria; p__WS4; c__WS4; o__WS4; f__WS4; g__WS4; s__uncultured_bacterium
1d03d620906050ed27884431840336c4	d__Bacteria; p__Spirochaetota; c__Spirochaetia; o__Spirochaetales; f__Spirochaetaceae; g__uncultured; s__uncultured_bacterium
44918cece7d3d147a99a634bf3e16ced	d__Bacteria; p__Acidobacteriota; c__Acidobacteriae; o__Solibacterales; f__Solibacteraceae; g__Candidatus_Solibacter
dedb119fed19d25a2d17e516cfe530ec	d__Bacteria; p__Acidobacteriota; c__Acidobacteriae; o__Acidobacteriales; f__uncultured; g__uncultured
753e45f34c894d70c9c17b614960c20b	d__Bacteria; p__Patescibacteria; c__Berkelbacteria; o__Berkelbacteria; f__Berkelbacteria; g__Berkelbacteria; s__uncultured_Epsilonproteobacteria
babba13109e3f7ba2249f924508a765d	d__Bacteria; p__Chloroflexi; c__Anaerolineae; o__Anaerolineales; f__Anaerolineaceae; g__Leptolinea
637e27be7330722c798792ec4e9824ef	d__Bacteria; p__Bacteroidota; c__Bacteroidia; o__Bacteroidales; f__Paludibacteraceae; g__uncultured; s__uncultured_Bacteroidetes
299e6944edcee125bccbcb81b69d2841	d__Bacteria; p__Actinobacteriota; c__Thermoleophilia; o__Solirubrobacterales; f__Solirubrobacteraceae
b9c8122d81b138a072a8ba1a48eefea4	d__Bacteria; p__Proteobacteria; c__Alphaproteobacteria; o__Rhizobiales; f__Xanthobacteraceae; g__Bradyrhizobium
1f20e8afd6eef5005c27946bd7c226d3	d__Eukaryota; p__Peronosporomycetes; c__Peronosporomycetes; o__Peronosporomycetes; f__Peronosporomycetes
96786e82e7d0ec3e6f8e1e208460327b	d__Bacteria; p__Proteobacteria; c__Gammaproteobacteria; o__JG36-TzT-191; f__JG36-TzT-191; g__JG36-TzT-191; s__uncultured_gamma
25384d0c5138bb8aa1f5ac183432812a	d__Bacteria; p__Patescibacteria; c__Parcubacteria; o__Candidatus_Adlerbacteria; f__Candidatus_Adlerbacteria; g__Candidatus_Adlerbacteria; s__metagenome
d4cc10a71c17a847ab7c7870eb61dd45	d__Bacteria; p__Caldisericota; c__Caldisericia; o__Caldisericales; f__Caldisericaceae; g__Caldisericum
606507fa326bf59b8052e2c032ed3a9f	d__Bacteria; p__Bacteroidota; c__Bacteroidia; o__Bacteroidales; f__Prolixibacteraceae; g__BSV13; s__uncultured_bacterium
1047896572700ca2d609d2e8ea631c33	d__Bacteria; p__Acidobacteriota; c__Acidobacteriae; o__Subgroup_2; f__Subgroup_2; g__Subgroup_2
c3b21173e99c1b52d593abd9cc147dcf	d__Bacteria; p__Bacteroidota; c__Bacteroidia; o__Bacteroidales; f__Prolixibacteraceae; g__BSV13; s__uncultured_Bacteroidetes
c5eec3a59ddedbc50f0f0231105ebb29	d__Bacteria; p__Verrucomicrobiota; c__Omnitrophia; o__Omnitrophales; f__Omnitrophales; g__Omnitrophales; s__uncultured_prokaryote
1b227a02a13a19372bd570808fdfca12	d__Archaea; p__Halobacterota; c__Methanomicrobia; o__Methanomicrobiales; f__Methanoregulaceae; g__Methanoregula
545295df1f77d0d129fae38a0a9de4cb	d__Eukaryota; p__Basidiomycota; c__Agaricomycetes
bd84eab58ce8bf5ff3a43ab1d84bdc12	d__Bacteria; p__Proteobacteria; c__Gammaproteobacteria; o__Burkholderiales; f__Comamonadaceae
5d4b56bdd1cc4309947f57febc295c98	d__Bacteria; p__Actinobacteriota; c__Acidimicrobiia; o__uncultured; f__uncultured; g__uncultured
9d744eca1a5daa937313ee01f79bd4c6	d__Bacteria; p__Acidobacteriota; c__Acidobacteriae
4bfd7fcf69ebe611ff821226d7975739	d__Bacteria; p__Sumerlaeota; c__Sumerlaeia; o__Sumerlaeales; f__Sumerlaeaceae; g__Sumerlaea; s__uncultured_organism
49d0ddcd457d61ffdc44be8fe016a2ad	d__Bacteria; p__Acidobacteriota; c__Acidobacteriae; o__Solibacterales; f__Solibacteraceae; g__Candidatus_Solibacter
0cb70bfbe39b4ecf7893ccbd73ff9d33	d__Bacteria; p__Acidobacteriota; c__Acidobacteriae; o__Solibacterales; f__Solibacteraceae; g__Candidatus_Solibacter
18f6be729a375c7764eed0c099c87b6f	d__Bacteria; p__Chloroflexi; c__Dehalococcoidia; o__RBG-13-46-9; f__RBG-13-46-9; g__RBG-13-46-9; s__uncultured_bacterium
c024a021d5d0c6ee71d486cec3463f19	d__Bacteria; p__Firmicutes; c__Clostridia
949e4d6d122b898af01d2254896206bc	d__Bacteria; p__Myxococcota; c__Polyangia; o__Haliangiales; f__Haliangiaceae; g__Haliangium
0924594801fc9f6e9a2b1eeb35cfdd73	d__Bacteria; p__Proteobacteria; c__Gammaproteobacteria; o__Burkholderiales; f__Rhodocyclaceae
d1d07e8a96027e0a9bea62e2758177c2	d__Bacteria; p__Acidobacteriota; c__Holophagae; o__Subgroup_7; f__Subgroup_7; g__Subgroup_7; s__uncultured_Thermaerobacter
25efa9db78d5826cef059b30ff7b92ba	d__Bacteria; p__Patescibacteria; c__Parcubacteria; o__Parcubacteria; f__Parcubacteria; g__Parcubacteria; s__uncultured_bacterium
35f83714bfd9c1fed87b22ea4697960d	d__Bacteria; p__Proteobacteria; c__Alphaproteobacteria; o__Elsterales; f__uncultured; g__uncultured
1171c1ce6332cc3c97378f9995f18654	d__Bacteria; p__WPS-2; c__WPS-2; o__WPS-2; f__WPS-2; g__WPS-2; s__uncultured_Firmicutes
5c4ef576b61c2aefa25cd0fb027555de	d__Archaea; p__Euryarchaeota; c__Methanobacteria; o__Methanobacteriales; f__Methanobacteriaceae; g__Methanobacterium
339060d425578102188c6cfa693129a6	d__Bacteria; p__Actinobacteriota; c__Thermoleophilia; o__Gaiellales; f__uncultured; g__uncultured
92f09c8282735e29fcd554991e5c57a5	d__Bacteria; p__Patescibacteria; c__WWE3; o__WWE3; f__WWE3; g__WWE3; s__uncultured_anaerobic
0069c5bf3c6a0bf26dfe3f727ccecf04	d__Bacteria; p__Fibrobacterota; c__Fibrobacteria; o__Fibrobacterales; f__B122; g__B122; s__uncultured_bacterium
3cd8a2c7c5f0cd4f71eca26eeeb0430f	d__Bacteria; p__Planctomycetota; c__Planctomycetes; o__Pirellulales; f__Pirellulaceae; g__Pir1_lineage
34333ebad445565486792b8759bdd26e	d__Bacteria; p__Firmicutes; c__Bacilli; o__Erysipelotrichales; f__Erysipelatoclostridiaceae; g__UCG-004; s__uncultured_bacterium
0d3bfdb903dac1940dcb43e3d0fba815	d__Bacteria; p__Actinobacteriota; c__Thermoleophilia; o__Solirubrobacterales; f__Solirubrobacteraceae
71d44c2a2254c6ca7363118d1cc7181a	d__Bacteria; p__Actinobacteriota; c__Actinobacteria; o__Frankiales; f__Acidothermaceae; g__Acidothermus
4601aadd1f4a66542db34cbf42882d24	d__Bacteria; p__Bacteroidota; c__Bacteroidia; o__Bacteroidales; f__Prolixibacteraceae; g__WCHB1-32
26f17a05d6d40fde823fafd2c64ba14b	d__Bacteria; p__Actinobacteriota; c__Thermoleophilia; o__Gaiellales
0274c0ee2cc3ce6f943640cd0a65eeb3	d__Bacteria; p__Patescibacteria; c__Parcubacteria; o__Candidatus_Kaiserbacteria; f__Candidatus_Kaiserbacteria; g__Candidatus_Kaiserbacteria; s__uncultured_Parcubacteria
cb9abe011c8a66c51e21790cef356da8	d__Bacteria; p__Acidobacteriota; c__Acidobacteriae; o__Acidobacteriae; f__Acidobacteriae; g__Paludibaculum
539a2620955fad88f26da586f05a2432	d__Bacteria; p__Acidobacteriota; c__Acidobacteriae; o__Acidobacteriales; f__Acidobacteriaceae_(Subgroup_1); g__Occallatibacter; s__bacterium_K-5b10
2b912d5bbdd0487b2a33401b07f7d197	d__Archaea; p__Halobacterota; c__Methanosarcinia; o__Methanosarciniales; f__Methanosaetaceae; g__Methanosaeta
5caca4f73b6ef6042b4cd8c422615529	d__Bacteria; p__Acidobacteriota; c__Acidobacteriae; o__Acidobacteriales; f__Acidobacteriaceae_(Subgroup_1); g__uncultured
5e89dc7b4d83b47a3e79e8cb0828f480	d__Bacteria; p__Patescibacteria; c__Microgenomatia; o__Candidatus_Shapirobacteria; f__Candidatus_Shapirobacteria; g__Candidatus_Shapirobacteria; s__metagenome
36577bc29eec196e9e05ed9f97dbb6db	d__Bacteria; p__Planctomycetota; c__Phycisphaerae; o__Phycisphaerales; f__Phycisphaeraceae; g__I-8; s__uncultured_Planctomycetales
5dbb2a394e13d60a728861a093d93037	d__Bacteria; p__Acidobacteriota; c__Acidobacteriae; o__Acidobacteriales; f__Acidobacteriaceae_(Subgroup_1); g__Granulicella
e5987ac753b7b81c9630fead2c969966	d__Bacteria; p__Actinobacteriota; c__Acidimicrobiia; o__uncultured; f__uncultured; g__uncultured; s__uncultured_Actinomycetales
d73c7b98ad0eb1ea00f9ac20cc7a14e1	d__Eukaryota; p__Basidiomycota; c__Agaricomycetes; o__Agaricales
2f0bc8726a21396c5f7310897c40cc76	d__Bacteria; p__Proteobacteria; c__Alphaproteobacteria; o__Acetobacterales; f__Acetobacteraceae; g__uncultured; s__uncultured_bacterium
7c0f6382d97946f90521d10757522408	d__Bacteria; p__Fibrobacterota; c__Fibrobacteria; o__Fibrobacterales; f__Fibrobacteraceae; g__uncultured; s__metagenome
2cc245f3a44ca10653c8fc9a7be2dd1a	d__Bacteria; p__Actinobacteriota; c__Actinobacteria; o__Frankiales; f__Acidothermaceae; g__Acidothermus
a7a928179b2d358e1c690a2f71236ad6	d__Bacteria; p__Desulfobacterota; c__Desulfuromonadia; o__Geobacterales; f__Geobacteraceae; g__Citrifermentans; s__uncultured_Geobacteraceae
fc6c432ffdc45ef47357bad218f843dc	d__Bacteria; p__Bacteroidota; c__Ignavibacteria; o__Ignavibacteriales
e9beec74807b6204026d184b5a5ffb9c	d__Bacteria; p__Patescibacteria; c__Microgenomatia; o__Candidatus_Woesebacteria; f__Candidatus_Woesebacteria; g__Candidatus_Woesebacteria; s__uncultured_Microgenomates
b5be42df479d0c620e0539a2bf4286e5	d__Bacteria; p__Firmicutes; c__Clostridia; o__Oscillospirales; f__Ruminococcaceae
5aa0e13027362b036ff202447868eda8	d__Bacteria; p__Acidobacteriota; c__Acidobacteriae; o__Acidobacteriales; f__Acidobacteriaceae_(Subgroup_1); g__uncultured
1276c7b254f0455d9cf08e9e2f3a24ed	d__Bacteria; p__Patescibacteria; c__Parcubacteria; o__Parcubacteria; f__Parcubacteria; g__Parcubacteria; s__uncultured_bacterium
8e48262f060d880beff8e5e78389503f	d__Bacteria; p__Actinobacteriota; c__Thermoleophilia; o__Solirubrobacterales; f__Solirubrobacteraceae; g__Conexibacter; s__uncultured_Conexibacteraceae
19a3d50fbd0c497bb41cc0ea200e5bf7	d__Archaea; p__Halobacterota; c__Methanomicrobia; o__Methanomicrobiales; f__Methanoregulaceae; g__Methanoregula
5c540dcdb783ed1e49b79959e4a01100	d__Bacteria; p__Chloroflexi; c__KD4-96; o__KD4-96; f__KD4-96; g__KD4-96; s__uncultured_bacterium
cf754db4d00ef281bb53e62184c2a684	d__Bacteria; p__Acidobacteriota; c__Acidobacteriae; o__Acidobacteriales; f__uncultured; g__uncultured
2f90b8559d6bf6a9618a8898e7e9d8cd	d__Archaea; p__Halobacterota; c__Methanosarcinia; o__Methanosarciniales; f__Methanosaetaceae; g__Methanosaeta
21f742f48fd1a21e58c299d40584f5f3	d__Bacteria; p__Proteobacteria; c__Gammaproteobacteria; o__Burkholderiales; f__Oxalobacteraceae; g__uncultured
b78e31574742d6b9a3677f5670665b1a	d__Bacteria; p__Actinobacteriota; c__Actinobacteria; o__Frankiales; f__Acidothermaceae; g__Acidothermus; s__uncultured_bacterium
d079e7ef70ec2252e6b99d68efce687b	d__Archaea; p__Crenarchaeota; c__Bathyarchaeia; o__Bathyarchaeia; f__Bathyarchaeia; g__Bathyarchaeia; s__uncultured_Thermoproteales
2ec7d6e3ba5951ffa4d987f9feb32733	d__Bacteria; p__Planctomycetota; c__Planctomycetes; o__Pirellulales; f__Pirellulaceae; g__Pir2_lineage
98f14d874f231d316d932987bc59c39c	d__Bacteria; p__Cyanobacteria; c__Cyanobacteriia; o__Chloroplast; f__Chloroplast; g__Chloroplast
c729abfc31dc163c65f836bb0c485e12	d__Bacteria; p__Actinobacteriota; c__Thermoleophilia; o__Gaiellales; f__uncultured; g__uncultured; s__uncultured_Solirubrobacterales
32fb12dfc764e80c7391da7b20fa196f	d__Bacteria; p__Armatimonadota
c5cad05926b4d91d2ac98d2075e82c9a	d__Bacteria; p__Chloroflexi; c__KD4-96; o__KD4-96; f__KD4-96; g__KD4-96
311a7badd93c7bccf05c4456fdd96eb3	d__Bacteria; p__Bacteroidota; c__Bacteroidia; o__Bacteroidales; f__Prevotellaceae; g__Prevotella
a10523ed9e11d4defbc9d68e950a2b9b	Unassigned
f098b1557b7a76dd7bf9900976d71b35	d__Bacteria; p__Proteobacteria; c__Gammaproteobacteria; o__Burkholderiales; f__Oxalobacteraceae; g__uncultured; s__bacterium_enrichment
03ab47ee7e9fe582d18d853d5402c743	d__Bacteria; p__Acidobacteriota; c__Acidobacteriae; o__Acidobacteriales; f__Acidobacteriaceae_(Subgroup_1)
f8996b4c050d3aab68d5f1af4d90ff0e	d__Bacteria; p__Chloroflexi; c__AD3; o__AD3; f__AD3; g__AD3
6962a4581ff40c63a9b0c0c28ab73f54	d__Bacteria; p__Acidobacteriota; c__Acidobacteriae; o__Acidobacteriales; f__Acidobacteriaceae_(Subgroup_1)
413527ac5cd9b16e764025fd46996b3f	d__Bacteria; p__Acidobacteriota; c__Acidobacteriae; o__Acidobacteriales; f__Acidobacteriaceae_(Subgroup_1); g__Granulicella
b9a40f370513960f2e66b02f17f1bb2f	d__Bacteria; p__Nitrospirota; c__Thermodesulfovibrionia; o__uncultured; f__uncultured; g__uncultured; s__uncultured_bacterium
9dd772573df7a8694f27b00fc98912db	d__Eukaryota; p__Apicomplexa; c__Conoidasida; o__Gregarinasina; f__Eugregarinorida; g__Eugregarinorida
6f21e7dd7a34d15ed36593bc21013923	d__Archaea; p__Micrarchaeota; c__Micrarchaeia; o__Micrarchaeales; f__Micrarchaeales; g__Micrarchaeales; s__uncultured_archaeon
f501950056eab9b713e6fcdcfc2bc280	d__Bacteria; p__Armatimonadota; c__Fimbriimonadia; o__Fimbriimonadales; f__Fimbriimonadaceae; g__Fimbriimonas
8750527ede2c7512cf5ef3541ae0b74b	d__Bacteria; p__Planctomycetota; c__Planctomycetes; o__Pirellulales; f__Pirellulaceae; g__Pir2_lineage
70391d0762f001e0f48b9d516b2972d0	d__Bacteria; p__Patescibacteria; c__Parcubacteria; o__Candidatus_Nomurabacteria; f__Candidatus_Nomurabacteria; g__Candidatus_Nomurabacteria; s__uncultured_soil
5a8b441804c19ded7944bdfda49d11aa	d__Bacteria; p__Planctomycetota; c__Planctomycetes; o__Isosphaerales; f__Isosphaeraceae; g__Tundrisphaera
d38a4617593d6fadae633542f1c2cd67	d__Bacteria; p__Actinobacteriota; c__Actinobacteria; o__Frankiales; f__Acidothermaceae; g__Acidothermus
9dd38206056601a81993076044e04d4d	d__Eukaryota; p__Basidiomycota; c__Agaricomycetes
fd0e9aa63471a0bc8f1dd7aa32b3d217	d__Bacteria; p__Planctomycetota; c__Phycisphaerae; o__Phycisphaerales; f__AKAU3564_sediment_group; g__AKAU3564_sediment_group; s__uncultured_organism
d425f2492e2b3c65a99da7fdb370f18c	d__Bacteria; p__Bacteroidota; c__Bacteroidia; o__Bacteroidales; f__Paludibacteraceae; g__uncultured; s__marine_metagenome
84caa4a1777e991ef2a612a378ee399c	d__Bacteria; p__Bacteroidota; c__Bacteroidia; o__Bacteroidales; f__Paludibacteraceae; g__Paludibacter; s__uncultured_bacterium
32e3d24cf31d064fe9b0430cd5ccc6d4	d__Bacteria; p__Actinobacteriota; c__Actinobacteria; o__Micrococcales; f__Intrasporangiaceae; g__Oryzihumus; s__uncultured_bacterium
b9f57de71316766c3be2af2ba610623b	d__Bacteria; p__Firmicutes; c__Clostridia; o__Oscillospirales
890696ba4a14703957e0d9dcc55b82fb	d__Bacteria; p__Chloroflexi; c__Anaerolineae; o__Anaerolineales; f__Anaerolineaceae; g__Leptolinea
4420f55674197794436694d52bcbe25f	d__Bacteria; p__Fibrobacterota; c__Fibrobacteria; o__Fibrobacterales; f__B122; g__B122; s__uncultured_bacterium
e99128969a239ee26caeba61d3c220e5	d__Bacteria; p__Bacteroidota; c__Bacteroidia; o__Bacteroidales; f__Bacteroidetes_vadinHA17; g__Bacteroidetes_vadinHA17
19e9d18d077f39adb324ec9826428ef0	d__Bacteria; p__Chloroflexi; c__Anaerolineae; o__Anaerolineales; f__Anaerolineaceae; g__Leptolinea
a9c027df515e8b2a6f17736f4f1d2655	d__Bacteria; p__Bacteroidota; c__Bacteroidia; o__Bacteroidales
b0cb448d4233f539ab4ddfaf9716c3ea	d__Bacteria; p__Desulfobacterota; c__Desulfuromonadia; o__Geobacterales; f__Geobacteraceae; g__Geobacter
63a2d08cb5c6d0441f0abe968a681c7a	d__Eukaryota; p__Phragmoplastophyta; c__Embryophyta; o__Magnoliophyta; f__Magnoliophyta; g__Magnoliophyta
4269427cd3d3ba2da5f85bffcf2bdedb	d__Bacteria; p__Planctomycetota; c__Planctomycetes; o__Pirellulales; f__Pirellulaceae; g__Pir2_lineage
c286944a6e09d61ba9ab1c9f9659722d	d__Bacteria; p__Spirochaetota; c__Spirochaetia; o__Spirochaetales; f__Spirochaetaceae; g__uncultured; s__uncultured_bacterium
b7a1b15319e4ac8222dc5175074afac4	d__Bacteria; p__Desulfobacterota; c__Syntrophia; o__Syntrophales; f__Syntrophaceae; g__Syntrophus
adb3a6c6ab0998b7fd8baefeb271c668	d__Bacteria; p__Actinobacteriota; c__Thermoleophilia; o__Solirubrobacterales; f__Solirubrobacteraceae
f1ffcf52f3c7e52848f9291872e68250	d__Bacteria; p__Proteobacteria; c__Alphaproteobacteria; o__Acetobacterales; f__Acetobacteraceae; g__uncultured; s__uncultured_bacterium
01c01ed2eb51deefd9c078aee85bd85a	d__Bacteria; p__Desulfobacterota; c__Syntrophia; o__Syntrophales; f__Smithellaceae; g__Smithella
d2af22b3c873d25b08e3b0b07c091a65	d__Bacteria; p__Acidobacteriota; c__Acidobacteriae; o__Acidobacteriales; f__Acidobacteriaceae_(Subgroup_1); g__Occallatibacter; s__bacterium_K-5b10
b631e9a3929b2f4561e90a123e8b3baf	d__Bacteria; p__Proteobacteria; c__Alphaproteobacteria; o__Rhizobiales; f__Beijerinckiaceae; g__Rhodoblastus; s__uncultured_bacterium
cc736d3feeb4be1ee508b0a7ec367b12	d__Bacteria; p__Chloroflexi; c__AD3; o__AD3; f__AD3; g__AD3
e99d3af4dbbc2f6797aef7acc6a4b371	d__Bacteria; p__Actinobacteriota; c__Acidimicrobiia; o__uncultured; f__uncultured; g__uncultured
0af66d0dfe6787e018ed6083a1e48929	d__Bacteria; p__Caldisericota; c__Caldisericia; o__Caldisericales; f__Caldisericaceae; g__Caldisericum; s__uncultured_bacterium
ef4e5cb9258687c2469cfbd5e8ae2e43	d__Bacteria; p__Bacteroidota; c__Bacteroidia; o__Bacteroidales; f__Prolixibacteraceae; g__WCHB1-32; s__uncultured_Prolixibacter
1d8702b189d66387c23be0f51313f7e9	d__Bacteria; p__Acidobacteriota; c__Acidobacteriae; o__Acidobacteriales; f__Acidobacteriaceae_(Subgroup_1)
f27882f285bc48332a1e44edd4556aee	Unassigned
b50ecffc7f14d3bea9a0577c44f9f4d4	d__Bacteria; p__Firmicutes; c__Clostridia; o__Clostridia; f__Hungateiclostridiaceae
45cab8729b7e41ab1422baa2f6645d58	d__Archaea; p__Nanoarchaeota; c__Nanoarchaeia; o__Woesearchaeales; f__SCGC_AAA011-D5; g__SCGC_AAA011-D5; s__uncultured_archaeon
47c25a826e94321d45f1dcbed2806583	d__Bacteria; p__Proteobacteria; c__Gammaproteobacteria; o__WD260; f__WD260; g__WD260; s__uncultured_bacterium
3223c53327a0b40947e43627e9851c9a	d__Bacteria; p__Patescibacteria; c__Microgenomatia; o__Candidatus_Woesebacteria; f__Candidatus_Woesebacteria; g__Candidatus_Woesebacteria; s__uncultured_bacterium
52dca8040aa47a2a562ac56e749d935a	d__Bacteria; p__Firmicutes; c__Clostridia; o__Clostridia; f__Hungateiclostridiaceae; g__uncultured
58cfe5ec3f3879731efbfeac3e723150	d__Bacteria; p__Chloroflexi; c__AD3; o__AD3; f__AD3; g__AD3
0afddca3015c9684a2bfc5d3bc02cf27	Unassigned
3635f1644191a8a94b5c3c6ac4d86787	d__Bacteria; p__Patescibacteria; c__Parcubacteria; o__Candidatus_Kaiserbacteria; f__Candidatus_Kaiserbacteria; g__Candidatus_Kaiserbacteria; s__uncultured_bacterium
6c87988498181d57cb610ec2f973912d	d__Bacteria; p__Proteobacteria; c__Gammaproteobacteria; o__WD260; f__WD260; g__WD260; s__uncultured_bacterium
a69e3ed9170bdf5125779516f907be68	d__Bacteria; p__Acidobacteriota; c__Acidobacteriae; o__Acidobacteriales; f__Acidobacteriaceae_(Subgroup_1); g__Occallatibacter
e9c92d3148ff3513584e30b48bb0f6b1	d__Bacteria; p__Proteobacteria; c__Gammaproteobacteria; o__Burkholderiales; f__Gallionellaceae
05e857ea80dc03fc65412e307bd8f063	d__Bacteria; p__Acidobacteriota; c__Acidobacteriae; o__Solibacterales; f__Solibacteraceae; g__Candidatus_Solibacter
c7c695151fda7fecf5d96012a2d3bfd8	d__Bacteria; p__Bacteroidota; c__Bacteroidia; o__Bacteroidales; f__Paludibacteraceae; g__Paludibacter; s__uncultured_bacterium
a2e4fa58f5c1e0f157c63c5915d8e149	d__Bacteria; p__Actinobacteriota; c__Thermoleophilia; o__Gaiellales; f__uncultured; g__uncultured
4ae058349fb6637e22a502fc8ffccdf8	d__Eukaryota; p__Ciliophora; c__Intramacronucleata; o__Conthreep; f__Oligohymenophorea
7dfe13ed4758536741bf2188bf46eafd	d__Bacteria; p__Planctomycetota; c__Planctomycetes; o__Pirellulales; f__Pirellulaceae
1cd552900baabac96a7ad303ca868ee0	d__Bacteria; p__Patescibacteria; c__Parcubacteria; o__Parcubacteria; f__Parcubacteria; g__Parcubacteria; s__uncultured_bacterium
836e396ef944cc82fa46a4d940259326	d__Bacteria; p__Actinobacteriota; c__Acidimicrobiia; o__uncultured; f__uncultured; g__uncultured; s__uncultured_forest
3318ac68133bdf6fb3d0b172e5982e74	d__Bacteria; p__Patescibacteria; c__Microgenomatia; o__Candidatus_Roizmanbacteria; f__Candidatus_Roizmanbacteria; g__Candidatus_Roizmanbacteria; s__uncultured_bacterium
3496f9a17fe094676041305124b428c5	d__Bacteria; p__Firmicutes; c__Clostridia; o__Clostridia; f__Hungateiclostridiaceae; g__Saccharofermentans; s__uncultured_bacterium
e9f1b16816822428051a2923e31e2b15	d__Bacteria; p__Bacteroidota; c__Bacteroidia; o__Bacteroidales; f__Prolixibacteraceae; g__WCHB1-32
3bb5f27047b1bf038bcad50f6e1a9369	d__Bacteria; p__Verrucomicrobiota; c__Verrucomicrobiae; o__Opitutales; f__Opitutaceae; g__Lacunisphaera; s__metagenome
857c8e751a7c414d30cec41df15ae5e3	d__Bacteria; p__Spirochaetota; c__Spirochaetia; o__Spirochaetales; f__Spirochaetaceae; g__uncultured; s__uncultured_bacterium
aa45d410831a405c9c9729f4e80f1184	d__Bacteria; p__Firmicutes; c__Negativicutes; o__Veillonellales-Selenomonadales; f__Sporomusaceae; g__uncultured; s__uncultured_Firmicutes
1e338e6b2a9f33bd4480aeb7011b7efd	d__Bacteria; p__Bacteroidota; c__Bacteroidia; o__Bacteroidales; f__Paludibacteraceae
c8512da5fee687e6c72bebb742c2b3b9	d__Bacteria; p__Fibrobacterota; c__Fibrobacteria; o__Fibrobacterales; f__B122; g__B122; s__uncultured_Fibrobacteres
62db4cd87d812023a8ca4c2c0614623a	d__Bacteria; p__Patescibacteria; c__Parcubacteria; o__Parcubacteria; f__Parcubacteria; g__Parcubacteria; s__uncultured_bacterium
6daa76b4fe89a51cc850eddd9b35b567	d__Bacteria; p__Proteobacteria; c__Alphaproteobacteria; o__Rhizobiales; f__Beijerinckiaceae; g__Roseiarcus
c0e6f033628e64bdc1b3c2f221e66b83	d__Bacteria; p__Acidobacteriota; c__Acidobacteriae; o__Acidobacteriales; f__Acidobacteriaceae_(Subgroup_1); g__Granulicella
aea4df19da3f36cfeb7f1f8d527d5a7a	d__Bacteria; p__Bacteroidota; c__Bacteroidia; o__Bacteroidales; f__Prolixibacteraceae; g__BSV13; s__uncultured_bacterium
59ef1bf35b23ab1456bf10b3b66ecc74	d__Bacteria; p__Actinobacteriota; c__Acidimicrobiia; o__IMCC26256; f__IMCC26256; g__IMCC26256
1fcd63c233cdc388172a8163f964fea4	d__Bacteria; p__Firmicutes; c__Clostridia; o__Christensenellales; f__Christensenellaceae
e2133962179c1388704efa8dbff7a6e0	Unassigned
6ec82012bf538f28ed8e2bc43378690a	d__Bacteria; p__Proteobacteria; c__Alphaproteobacteria; o__Rhizobiales; f__Xanthobacteraceae; g__uncultured
01cf5ad37ed231772af07892485aab62	d__Bacteria; p__Patescibacteria; c__Microgenomatia; o__Candidatus_Woesebacteria; f__Candidatus_Woesebacteria; g__Candidatus_Woesebacteria; s__uncultured_Microgenomates
f147920335fcbd5958a7b6df41c208f2	d__Bacteria; p__Planctomycetota; c__Phycisphaerae; o__Tepidisphaerales; f__CPla-3_termite_group; g__CPla-3_termite_group; s__metagenome
1fc53a8d925fcae9e08e20e19122bf27	d__Bacteria; p__Acidobacteriota; c__Acidobacteriae; o__AKIW659; f__AKIW659; g__AKIW659; s__uncultured_bacterium
5cb2ad00f15c5b0b66c33183b0c2fc33	d__Bacteria; p__Acidobacteriota; c__Acidobacteriae; o__Solibacterales; f__Solibacteraceae; g__Candidatus_Solibacter
ebea05c78b06b0d73f76a38ccdaab55c	d__Bacteria; p__Acidobacteriota; c__Acidobacteriae; o__Solibacterales; f__Solibacteraceae; g__Candidatus_Solibacter
cd744e55387ab9d8fc37210dc8c5064e	d__Bacteria; p__Armatimonadota; c__uncultured; o__uncultured; f__uncultured; g__uncultured; s__uncultured_bacterium
287afe3272da2d58c356f0ac322f99d0	d__Bacteria; p__Proteobacteria; c__Alphaproteobacteria; o__Rhizobiales; f__Xanthobacteraceae; g__uncultured
70dd902ebbdb95ecd3e8a3e4f7073879	d__Bacteria; p__Bacteroidota; c__Bacteroidia; o__Bacteroidales; f__Prolixibacteraceae; g__BSV13; s__uncultured_bacterium
a60ff081c76c55daeaf416c3a0f691b2	d__Bacteria; p__WS4; c__WS4; o__WS4; f__WS4; g__WS4; s__uncultured_bacterium
0526269544d81fa2c9b0909c8bb873d1	d__Bacteria; p__Chloroflexi; c__Anaerolineae; o__Anaerolineales; f__Anaerolineaceae; g__Leptolinea
bc66b24ebcb22ee5afbc5feb203e7ea9	d__Bacteria; p__Acidobacteriota; c__Acidobacteriae; o__Bryobacterales; f__Bryobacteraceae; g__Bryobacter
6598837b0d6911751c5f3bbca7684e48	d__Bacteria; p__Actinobacteriota; c__Thermoleophilia; o__Gaiellales; f__uncultured; g__uncultured; s__uncultured_bacterium
600b044a395cd1653d23c29384823c21	d__Eukaryota; p__Basidiomycota; c__Microbotryomycetes; o__Sporidiobolales; f__Sporidiobolaceae; g__Rhodotorula; s__Rhodotorula_glutinis
fd45a860634a615b9c4bedce22caa36d	d__Bacteria; p__Acidobacteriota; c__Acidobacteriae; o__Acidobacteriales; f__Acidobacteriaceae_(Subgroup_1); g__Granulicella
3be39cb7489fa341f70cd9e099969cae	d__Bacteria; p__Proteobacteria; c__Gammaproteobacteria; o__Burkholderiales; f__Comamonadaceae; g__Rhizobacter
b11bab74121dbe6b18bb6fe51f91b42a	d__Bacteria; p__Proteobacteria; c__Gammaproteobacteria; o__Burkholderiales; f__Methylophilaceae
4e8573a45df8832f614ef33f6cd42bdd	d__Bacteria; p__Chloroflexi; c__AD3; o__AD3; f__AD3; g__AD3
df928f37d52112530b8b58df06b3143b	d__Bacteria; p__Actinobacteriota; c__Acidimicrobiia; o__uncultured; f__uncultured; g__uncultured; s__uncultured_forest
ecc36a740a32dbd9f1dd4ef590d4361b	d__Bacteria; p__Proteobacteria; c__Alphaproteobacteria; o__Rhizobiales; f__Xanthobacteraceae
e4ca18f71b7ba8b954f7c323ba914927	d__Bacteria; p__Acidobacteriota; c__Acidobacteriae; o__Acidobacteriales; f__Acidobacteriaceae_(Subgroup_1)
e0a108284f74db24d616c19cc05cd77c	d__Bacteria; p__Planctomycetota; c__Planctomycetes; o__Pirellulales; f__Pirellulaceae; g__Pir2_lineage
8a88d0c9c73e36d3c0d490cede5bb2a9	d__Bacteria; p__Proteobacteria; c__Gammaproteobacteria; o__Burkholderiales; f__A21b; g__A21b; s__uncultured_bacterium
0d42d5c5225bcb432ec702924a973cc8	d__Bacteria; p__Chloroflexi; c__KD4-96; o__KD4-96; f__KD4-96; g__KD4-96
5196070fc673e57023fd4d88dfdc995e	d__Bacteria; p__Firmicutes; c__Clostridia; o__Clostridia; f__Hungateiclostridiaceae; g__Saccharofermentans; s__uncultured_bacterium
a7f968cf50d921827b76f48c465c7133	d__Bacteria; p__Acidobacteriota; c__Acidobacteriae; o__Acidobacteriae; f__Acidobacteriae; g__Paludibaculum; s__uncultured_Acidobacteria
20a7054cb3102fb0af4304554e6268b0	d__Bacteria; p__Verrucomicrobiota; c__Verrucomicrobiae; o__Pedosphaerales; f__Pedosphaeraceae; g__uncultured
c88261ace94f9b054cc3a8828d5bd3ac	d__Bacteria; p__Firmicutes; c__Clostridia; o__Clostridia; f__Hungateiclostridiaceae
bc12254260936f2690e6f59e3d3158e5	d__Bacteria; p__Firmicutes; c__Negativicutes; o__Veillonellales-Selenomonadales; f__Sporomusaceae; g__uncultured
22f77272b0fd8a5af96106099c432e59	d__Bacteria; p__Acidobacteriota; c__Acidobacteriae; o__Acidobacteriales; f__Acidobacteriaceae_(Subgroup_1); g__Occallatibacter
c6b2432801a61d282168f3688b99146e	d__Bacteria; p__Verrucomicrobiota; c__Omnitrophia; o__Omnitrophales; f__Omnitrophaceae; g__Candidatus_Omnitrophus; s__bioreactor_metagenome
d23e21012f299d5015b247968afac998	d__Bacteria; p__Proteobacteria; c__Alphaproteobacteria; o__Acetobacterales; f__Acetobacteraceae; g__Acidocella; s__uncultured_bacterium
5599fc8cbc203a3d0a3f0f65af0143f1	d__Bacteria; p__Desulfobacterota; c__Syntrophorhabdia; o__Syntrophorhabdales; f__Syntrophorhabdaceae; g__Syntrophorhabdus; s__uncultured_bacterium
a3bb15aa944b71ab9120ca3351ec309c	d__Bacteria; p__Actinobacteriota; c__Thermoleophilia; o__Gaiellales; f__uncultured; g__uncultured; s__uncultured_Solirubrobacterales
fb344c6c0961e7703a366c076440d6c6	d__Bacteria; p__Bacteroidota; c__Bacteroidia; o__Bacteroidales; f__Prolixibacteraceae; g__BSV13; s__uncultured_bacterium
7e8a82b16f27388093febb01304419ac	d__Bacteria; p__Planctomycetota; c__Phycisphaerae; o__Tepidisphaerales; f__CPla-3_termite_group; g__CPla-3_termite_group; s__uncultured_bacterium
2473174b10947d9a7b5ee15bdccec2de	d__Archaea; p__Halobacterota; c__Methanomicrobia; o__Methanomicrobiales; f__Methanoregulaceae; g__Methanoregula; s__uncultured_archaeon
06709a4c92095e67d9c4c6e2b9e3af84	d__Bacteria; p__Planctomycetota; c__Phycisphaerae; o__Tepidisphaerales; f__WD2101_soil_group; g__WD2101_soil_group
6a6fef6870e91fa2ecacebcbeacd7a36	d__Bacteria; p__Firmicutes; c__Negativicutes; o__Veillonellales-Selenomonadales; f__Sporomusaceae; g__uncultured
f0d07dd905b9ab5ac3d028315d2f8d8e	d__Bacteria; p__Proteobacteria; c__Alphaproteobacteria; o__Rhizobiales; f__Beijerinckiaceae; g__Roseiarcus
fc68dece2a0f02d6fb48b8fb5728b588	d__Bacteria; p__Patescibacteria; c__Microgenomatia; o__Candidatus_Roizmanbacteria; f__Candidatus_Roizmanbacteria; g__Candidatus_Roizmanbacteria; s__uncultured_bacterium
17153991be9543573591432c980a329d	d__Bacteria; p__Patescibacteria; c__Microgenomatia; o__Candidatus_Woesebacteria; f__Candidatus_Woesebacteria; g__Candidatus_Woesebacteria
90e7553b8af8e83310ff9c27794aff94	d__Bacteria; p__Fibrobacterota; c__Fibrobacteria; o__Fibrobacterales; f__B122; g__B122; s__uncultured_Fibrobacteres
936579c0344949e2a1dd8e263f1fa61d	d__Bacteria; p__Gemmatimonadota; c__Gemmatimonadetes; o__Gemmatimonadales; f__Gemmatimonadaceae; g__uncultured; s__uncultured_bacterium
16b8374691bcc38c3e83dff6f9d33556	d__Bacteria; p__Chloroflexi; c__Anaerolineae; o__Anaerolineales; f__Anaerolineaceae; g__Leptolinea; s__uncultured_bacterium
6777b53938c933b4b9e1cb67a956d1d9	d__Eukaryota; p__Phragmoplastophyta; c__Embryophyta
7d9ab78a49305e6eec7f6fcace7e8407	d__Archaea; p__Halobacterota; c__Methanosarcinia; o__Methanosarciniales; f__Methanosarcinaceae; g__Methanosarcina
ef075a96bce21267a3df20151399e89d	d__Bacteria; p__WPS-2; c__WPS-2; o__WPS-2; f__WPS-2; g__WPS-2; s__uncultured_bacterium
7ccc00aee5491b5cfcfd8e8d7b60e070	d__Bacteria; p__Acidobacteriota; c__Acidobacteriae; o__Subgroup_2; f__Subgroup_2; g__Subgroup_2; s__uncultured_forest
c49bfbc79ad0a00b2b0268f7ea772602	d__Bacteria; p__Bacteroidota; c__Bacteroidia; o__Bacteroidales; f__Paludibacteraceae
a2f255314e86caa3a759684bee3d1768	d__Bacteria; p__Proteobacteria; c__Gammaproteobacteria; o__Burkholderiales; f__Comamonadaceae
9dc6d65d756fa4e64c3a78399d906766	d__Bacteria; p__Acidobacteriota; c__Acidobacteriae; o__Acidobacteriales; f__Acidobacteriaceae_(Subgroup_1); g__uncultured
f061cb2ef869daba3bead2569bff0709	d__Bacteria; p__Actinobacteriota; c__Thermoleophilia; o__Gaiellales; f__uncultured; g__uncultured
1b4265ac097e53286d7520e2cca22cf0	d__Bacteria; p__Patescibacteria; c__Microgenomatia; o__Candidatus_Levybacteria; f__Candidatus_Levybacteria; g__Candidatus_Levybacteria; s__uncultured_bacterium
a7cec9b92a8c687a2bca630d851e7f95	d__Bacteria; p__Bacteroidota; c__Bacteroidia; o__Bacteroidales
46a1d2dcf3ca7fb83193ea9d91dd08bd	d__Eukaryota
b7cd519c401c7ab8005161f43aaa609c	d__Bacteria; p__Desulfobacterota; c__Desulfuromonadia; o__Geobacterales; f__Geobacteraceae; g__Trichlorobacter
fb0abed2b12107842cea6035630e4fd2	d__Bacteria; p__Fibrobacterota; c__Fibrobacteria; o__Fibrobacterales; f__B122; g__B122; s__uncultured_Fibrobacteres
465d6f5f898bb80a62b526330c5cb4fd	d__Bacteria; p__Armatimonadota; c__Armatimonadia; o__Armatimonadales; f__Armatimonadales; g__Armatimonadales; s__uncultured_bacterium
3f0a1211d82efa3b658c451f750c258d	d__Bacteria; p__Planctomycetota; c__Planctomycetes; o__Planctomycetales
22bd972fe0fe30151db6e38cf993b8af	d__Bacteria; p__Acidobacteriota; c__Acidobacteriae; o__Solibacterales; f__Solibacteraceae; g__Candidatus_Solibacter
a8bc19b1d083b5f560ac5197542b8b29	d__Bacteria; p__Planctomycetota; c__Planctomycetes; o__Isosphaerales; f__Isosphaeraceae; g__Aquisphaera; s__uncultured_bacterium
0066ee9ab1d0e812aba8247a3ee84b31	d__Bacteria; p__Verrucomicrobiota; c__Verrucomicrobiae; o__Pedosphaerales; f__Pedosphaeraceae; g__uncultured
99c1598f84a922be065ea30df7500d5a	d__Bacteria; p__Chloroflexi; c__Dehalococcoidia; o__Dehalococcoidales; f__Dehalococcoidaceae; g__Dehalococcoides; s__uncultured_bacterium
6909e1eb3258751f27d4da5f37b7ff65	d__Archaea; p__Halobacterota; c__Methanomicrobia; o__Methanomicrobiales; f__Methanoregulaceae; g__Methanoregula; s__uncultured_archaeon
40415e957a82a2aaa0bcb67878a2f06b	d__Bacteria; p__Acidobacteriota; c__Acidobacteriae; o__Bryobacterales; f__Bryobacteraceae; g__Bryobacter
ee683f5427f8872f56cc637ff85b03d8	d__Bacteria; p__Proteobacteria; c__Gammaproteobacteria; o__Burkholderiales; f__Nitrosomonadaceae; g__Ellin6067; s__uncultured_beta
b9618163034c35ca4937108c5564071f	d__Bacteria; p__Fibrobacterota; c__Fibrobacteria; o__Fibrobacterales; f__B122; g__B122; s__uncultured_bacterium
6d5bd3dea67d5e9fffb279406f4c7ef6	d__Bacteria; p__Actinobacteriota; c__Actinobacteria; o__Frankiales; f__Acidothermaceae; g__Acidothermus
e16e89e929d68a3ebedb8c546bfb286b	d__Bacteria; p__Firmicutes; c__Negativicutes; o__Veillonellales-Selenomonadales; f__Sporomusaceae; g__uncultured; s__uncultured_Firmicutes
5923343a3ffaf0a2413319f2ae005b51	d__Bacteria; p__Acidobacteriota; c__Acidobacteriae; o__Solibacterales; f__Solibacteraceae; g__Candidatus_Solibacter
5428eeedd4457dc0752bd732ac00eec2	d__Bacteria; p__Proteobacteria; c__Gammaproteobacteria; o__Burkholderiales; f__Oxalobacteraceae; g__Herbaspirillum
08ae787fcc9c7e956abdfb778ff13b75	d__Bacteria; p__Acidobacteriota; c__Acidobacteriae; o__Acidobacteriales; f__Acidobacteriaceae_(Subgroup_1)
fa090b4f5761003335faad0a2af0526a	d__Bacteria; p__Proteobacteria; c__Alphaproteobacteria; o__Caulobacterales; f__Caulobacteraceae
30dfab92d5ddbf60b4607d041b906c4d	d__Bacteria; p__Firmicutes; c__Clostridia; o__Oscillospirales; f__Ruminococcaceae
912929216d0b95eab7e6a690804061bd	d__Bacteria; p__Firmicutes; c__Bacilli; o__Erysipelotrichales; f__Erysipelatoclostridiaceae; g__UCG-004; s__uncultured_bacterium
66dedf5548f2d44c4689bfb18f8e0ac5	d__Bacteria; p__Proteobacteria; c__Alphaproteobacteria; o__Acetobacterales; f__Acetobacteraceae; g__Kozakia; s__Kozakia_baliensis
f1fc1e12e164b891f328b8de76563361	d__Bacteria; p__Actinobacteriota; c__Thermoleophilia; o__Gaiellales; f__uncultured; g__uncultured; s__uncultured_actinobacterium
66b3cb48d602fb07129afdd7552faa80	d__Bacteria; p__Proteobacteria; c__Alphaproteobacteria; o__Rhizobiales; f__Xanthobacteraceae; g__uncultured
c30db0b7ed59dbe6d159b6fe41fe483d	d__Bacteria; p__Proteobacteria; c__Alphaproteobacteria; o__Rhizobiales; f__Beijerinckiaceae; g__uncultured; s__uncultured_Alphaproteobacteria
a1cd275ba59f24062a0b1927a9e29482	d__Bacteria; p__Chloroflexi; c__KD4-96; o__KD4-96; f__KD4-96; g__KD4-96; s__uncultured_Chloroflexi
287dc24828328da2f7638373546e35ed	d__Bacteria; p__Chloroflexi; c__KD4-96; o__KD4-96; f__KD4-96; g__KD4-96; s__uncultured_Anaerolineaceae
c8e875e18fb6018c03a003d54cedf513	d__Bacteria; p__Patescibacteria; c__Microgenomatia; o__Candidatus_Woesebacteria; f__Candidatus_Woesebacteria; g__Candidatus_Woesebacteria
b8f253bbce02ea7e6a54dc7cdc287828	d__Bacteria; p__Actinobacteriota; c__Actinobacteria; o__Frankiales; f__Acidothermaceae; g__Acidothermus
8f116c846628e34c4b2a1ad8af59897d	d__Bacteria; p__Firmicutes; c__Negativicutes; o__Veillonellales-Selenomonadales; f__Sporomusaceae; g__Pelosinus
a4dadf0ed504a9d4594d72b1a3f32fe1	d__Bacteria; p__Verrucomicrobiota; c__Omnitrophia; o__Omnitrophales; f__Omnitrophaceae; g__Candidatus_Omnitrophus
1b46df5e8ce5ae19aa2dd29344a0a636	d__Bacteria; p__Patescibacteria; c__Microgenomatia; o__Candidatus_Shapirobacteria; f__Candidatus_Shapirobacteria; g__Candidatus_Shapirobacteria; s__uncultured_eubacterium
20fe293e8ac04d082d7395ef615ca6eb	d__Bacteria; p__Spirochaetota; c__Spirochaetia; o__Spirochaetales; f__Spirochaetaceae; g__Spirochaeta; s__uncultured_bacterium
ab215a18d1cea95432f9f73ebaf1c6c9	d__Bacteria; p__Patescibacteria; c__Berkelbacteria; o__Berkelbacteria; f__Berkelbacteria; g__Berkelbacteria; s__candidate_division
fb381c66bed15c9d894bd5fe3ee2dac6	d__Bacteria; p__Proteobacteria; c__Alphaproteobacteria; o__Rhizobiales; f__Xanthobacteraceae; g__uncultured
6293bbd50157361947a46a52721709c0	d__Bacteria; p__Proteobacteria; c__Gammaproteobacteria; o__Burkholderiales; f__Comamonadaceae
a1218f85ab70ac7e68b9fffaeb478963	d__Archaea; p__Halobacterota; c__Methanosarcinia; o__Methanosarciniales; f__Methanosarcinaceae; g__Methanosarcina
145f38fffe0d985cecae247ebea0b985	d__Bacteria; p__Acidobacteriota; c__Acidobacteriae; o__Acidobacteriales; f__uncultured; g__uncultured
90e4dd88d947a7a3df21387e14110392	d__Bacteria; p__Patescibacteria; c__Microgenomatia; o__Candidatus_Gottesmanbacteria; f__Candidatus_Gottesmanbacteria; g__Candidatus_Gottesmanbacteria; s__uncultured_soil
af1f7f087d439f6e158bd216e78ca85a	d__Bacteria; p__Chloroflexi; c__Anaerolineae; o__Anaerolineales; f__Anaerolineaceae; g__Leptolinea
c040e55cd230fb6cc946cf12fe3637a2	d__Bacteria; p__Planctomycetota; c__Planctomycetes; o__Pirellulales; f__Pirellulaceae
a9ee4112d5bbda0b0553cbeb5c36e97f	d__Bacteria; p__Patescibacteria; c__Microgenomatia; o__Candidatus_Shapirobacteria; f__Candidatus_Shapirobacteria; g__Candidatus_Shapirobacteria; s__uncultured_anaerobic
1cad243e16d072d33eb76822d64b69ec	d__Bacteria; p__Chloroflexi; c__Dehalococcoidia; o__Dehalococcoidales; f__uncultured; g__uncultured; s__uncultured_bacterium
e71e700a4e88fe7f082361ff598460fe	d__Bacteria
7ee6c9a4a085e4b66e620d8325f7e35e	d__Bacteria; p__Nitrospirota; c__Thermodesulfovibrionia; o__uncultured; f__uncultured; g__uncultured
dd4c7934aeecb4bcd8177e9d89ee7121	d__Bacteria; p__Firmicutes; c__Clostridia; o__Clostridia; f__Hungateiclostridiaceae
207c766c1ed41a8325201c7109b24901	d__Bacteria; p__Bacteroidota; c__Bacteroidia; o__Sphingobacteriales; f__Lentimicrobiaceae; g__Lentimicrobiaceae; s__uncultured_bacterium
e2e579dead6aa2118beef5d6b1bf57fd	d__Bacteria; p__Desulfobacterota; c__Desulfuromonadia; o__Geobacterales; f__Geobacteraceae; g__Trichlorobacter
54454d9ef9fbde0181fa3719a0c94050	d__Bacteria; p__Acidobacteriota; c__Acidobacteriae; o__Bryobacterales; f__Bryobacteraceae; g__Bryobacter; s__uncultured_soil
cffe3366105e2abf972ea32596b7cbec	d__Bacteria; p__Actinobacteriota; c__Actinobacteria; o__Micrococcales; f__Intrasporangiaceae; g__Oryzihumus; s__uncultured_bacterium
8886feef597d0c3191ad62a0e7c4ab6f	d__Bacteria; p__Acidobacteriota; c__Acidobacteriae; o__Solibacterales; f__Solibacteraceae; g__Candidatus_Solibacter
4fb3aabf9c4956f36011978b9d25aa20	d__Bacteria; p__Proteobacteria; c__Gammaproteobacteria; o__Burkholderiales; f__Comamonadaceae
ac9cdd3914fbcbab1fccc86bca8df607	d__Bacteria; p__Proteobacteria; c__Alphaproteobacteria; o__Rhizobiales; f__Beijerinckiaceae
27fc3047b46f738d3901de9170762d68	d__Eukaryota; p__Tardigrada; c__Eutardigrada; o__Parachela; f__Parachela; g__Parachela
85cbcbf77802de2e10f9aa4ee8b47024	d__Bacteria; p__Firmicutes
baf8362bf937a2cda5cab89277350698	d__Bacteria; p__Bacteroidota; c__Bacteroidia; o__Bacteroidales
eca3040fab4e244b2af7bcfe93c277ab	d__Bacteria; p__Proteobacteria; c__Gammaproteobacteria; o__Burkholderiales; f__Comamonadaceae
be07741ad326b5283bb715bab7c260da	d__Bacteria; p__Actinobacteriota; c__Acidimicrobiia
ff3ce45f75d4aacd6d6a78bec66f2346	d__Bacteria; p__Bacteroidota; c__Bacteroidia; o__Bacteroidales
9ebf4bdbe8822e09a766949c124ba0ab	d__Bacteria; p__Verrucomicrobiota; c__Verrucomicrobiae; o__Pedosphaerales; f__Pedosphaeraceae; g__Ellin516; s__uncultured_bacterium
4a75afafdf22a31db4266a03d1e5626e	d__Archaea; p__Euryarchaeota; c__Methanobacteria; o__Methanobacteriales; f__Methanobacteriaceae; g__Methanobacterium
8b2466b67f50052391367af67129eae9	d__Bacteria; p__Acidobacteriota; c__Acidobacteriae; o__Acidobacteriales; f__Acidobacteriaceae_(Subgroup_1)
ccac55a7389d711b3273fc12b761f16f	d__Bacteria; p__Acidobacteriota; c__Acidobacteriae; o__Acidobacteriales; f__Acidobacteriaceae_(Subgroup_1); g__Granulicella
d5c2542d5b2415a02a5cde4b1b02a970	d__Bacteria; p__Actinobacteriota
8a93b3d63252367defd173967200b72f	d__Bacteria; p__Firmicutes; c__Negativicutes; o__Veillonellales-Selenomonadales; f__Sporomusaceae; g__Pelosinus
c3613abe7708ac1e2e6f835c3c49a8d0	d__Bacteria; p__Actinobacteriota; c__Thermoleophilia; o__Solirubrobacterales; f__Solirubrobacteraceae; g__Conexibacter
5ba17501419359fc4001f09655c7c79b	d__Bacteria; p__Proteobacteria; c__Gammaproteobacteria; o__Burkholderiales; f__Oxalobacteraceae; g__Undibacterium
b45038b4ad39fd233b929f05b0adc385	d__Bacteria; p__Actinobacteriota; c__Thermoleophilia; o__Solirubrobacterales; f__Solirubrobacteraceae
557b92ce9b94dd455fc0f79d8a9518ce	d__Bacteria; p__Actinobacteriota; c__Thermoleophilia; o__Gaiellales; f__uncultured; g__uncultured
0f94dc84da742ecd700791b5ac6cee12	d__Bacteria; p__Patescibacteria; c__Microgenomatia; o__Candidatus_Shapirobacteria; f__Candidatus_Shapirobacteria; g__Candidatus_Shapirobacteria; s__uncultured_bacterium
421153077b09d22593072eac25be16d0	d__Bacteria; p__Actinobacteriota; c__Coriobacteriia; o__OPB41; f__OPB41; g__OPB41
4a7212d9f8babd45a9fc7c86d83748a1	d__Bacteria; p__Acidobacteriota; c__Acidobacteriae; o__Subgroup_2; f__Subgroup_2; g__Subgroup_2
64b8bbf1e27d55c91395eabec9c7540e	d__Bacteria; p__Bacteroidota; c__Bacteroidia; o__Sphingobacteriales; f__Lentimicrobiaceae; g__Lentimicrobiaceae; s__uncultured_bacterium
92e6d91671a8268d14c3a08e58ac3446	d__Bacteria; p__Proteobacteria; c__Alphaproteobacteria; o__Rhizobiales; f__Xanthobacteraceae; g__Bradyrhizobium
636cf045a26b3ece6aa4472d2a2715ed	Unassigned
488fa2e6af823b783d18eb0d11228c34	d__Bacteria; p__Acidobacteriota; c__Acidobacteriae; o__Bryobacterales; f__Bryobacteraceae; g__Bryobacter
ea671670f425b10affdbe15b2203fb9a	d__Bacteria; p__Acidobacteriota; c__Acidobacteriae; o__Acidobacteriales; f__Acidobacteriaceae_(Subgroup_1); g__uncultured
8a2fdc14cfe2820137f2ba6807011c07	d__Bacteria; p__Acidobacteriota; c__Acidobacteriae; o__Acidobacteriales; f__Acidobacteriaceae_(Subgroup_1)
4055e9ef7de2ff273a21571d1b9a0d15	d__Bacteria; p__Bacteroidota; c__Bacteroidia; o__Chitinophagales; f__Chitinophagaceae; g__Puia
69ae86def6633d7b6bebfe0b5c9fe2e3	d__Bacteria; p__Proteobacteria; c__Gammaproteobacteria; o__Burkholderiales; f__Comamonadaceae; g__Acidovorax
a851a7263fec7fa3401a3de49f2488c0	d__Bacteria; p__Bacteroidota; c__Bacteroidia; o__Bacteroidales; f__Dysgonomonadaceae; g__uncultured; s__uncultured_soil
d08d35da51c32d813259a1a31e8ce4cf	Unassigned
4614ecdee1f7c95b18ad64cd8e16fd35	d__Bacteria; p__Desulfobacterota; c__Desulfuromonadia; o__Geobacterales; f__Geobacteraceae; g__Citrifermentans; s__uncultured_Geobacteraceae
cec0333e6531e5cb079391d7ec9af628	d__Eukaryota; p__Nematozoa; c__Chromadorea; o__Rhabditida; f__Rhabditida; g__Rhabditida; s__Teratocephalus_lirellus
79bb93fd3c4b675f9e54494d3e98ec65	d__Bacteria; p__Acidobacteriota; c__Holophagae; o__Subgroup_7; f__Subgroup_7; g__Subgroup_7; s__uncultured_Thermaerobacter
6996e8f239dadbb341dd172a89e1b305	d__Bacteria; p__Proteobacteria; c__Gammaproteobacteria; o__Burkholderiales; f__Chromobacteriaceae; g__Paludibacterium; s__uncultured_bacterium
d7653a29afc0bc3391a8f781f71cb2c6	d__Bacteria; p__Proteobacteria; c__Gammaproteobacteria; o__Burkholderiales; f__Gallionellaceae; g__Sideroxydans
60c352b268840d625dc2b6325049db7d	d__Bacteria; p__Bacteroidota; c__Bacteroidia; o__Bacteroidales; f__Prolixibacteraceae; g__Roseimarinus; s__uncultured_bacterium
ffcac2e1d7d46273f0c6b247580b2cd4	d__Bacteria; p__Gemmatimonadota; c__Gemmatimonadetes; o__Gemmatimonadales; f__Gemmatimonadaceae; g__uncultured
25a1b91aef2c44cac6999d6038750855	d__Bacteria; p__Acidobacteriota; c__Acidobacteriae; o__Subgroup_2; f__Subgroup_2; g__Subgroup_2; s__uncultured_forest
547077399666dd672c188e45b7e75f0b	d__Bacteria; p__Planctomycetota; c__Planctomycetes; o__Pirellulales; f__Pirellulaceae
056412201cb9598159e6097358d07d70	d__Bacteria; p__Firmicutes; c__Clostridia; o__Oscillospirales; f__[Eubacterium]_coprostanoligenes_group; g__[Eubacterium]_coprostanoligenes_group; s__uncultured_Clostridia
f7edbfc3a4c7b5b1f82f37d96ba42ba9	d__Bacteria; p__Firmicutes; c__Clostridia; o__Oscillospirales
6584802c455ff3ec14ce6c1e2bfe2a95	d__Bacteria; p__Desulfobacterota; c__Desulfuromonadia; o__Geobacterales; f__Geobacteraceae; g__Geobacter
9b5c7301599b11f845b8cc5f0ca0eb55	d__Bacteria; p__Bacteroidota; c__Bacteroidia; o__Bacteroidales; f__Bacteroidetes_vadinHA17; g__Bacteroidetes_vadinHA17
6b709b38c9867287693b797bd64a77fb	d__Bacteria; p__Acidobacteriota; c__Holophagae; o__Holophagales; f__Holophagaceae; g__Geothrix
6852421f8b177d72243f54a02884ad61	d__Bacteria; p__Proteobacteria; c__Gammaproteobacteria; o__Burkholderiales
e7582fd1db068b84bd3dfca0003499d5	d__Bacteria; p__Planctomycetota; c__Planctomycetes; o__Pirellulales; f__Pirellulaceae; g__Pir4_lineage; s__uncultured_bacterium
8e521e6e5f686c14a826a2b8fa203c70	d__Bacteria; p__Firmicutes; c__Clostridia; o__Oscillospirales
142cbab6ac4a8b2515852d150cf43c6f	Unassigned
887505aa4b3bee301167a517716a3e12	d__Bacteria; p__Bacteroidota; c__Bacteroidia; o__Bacteroidales; f__Paludibacteraceae; g__uncultured; s__marine_metagenome
86f2926bef963d646c76f8fc7fca52a9	d__Bacteria; p__Acidobacteriota; c__Acidobacteriae; o__Acidobacteriales; f__Koribacteraceae; g__Candidatus_Koribacter; s__uncultured_Acidobacteria
637d6fd8cffbcb646358f9a88a44d0f5	d__Bacteria; p__Bacteroidota; c__Bacteroidia; o__Bacteroidales; f__Paludibacteraceae
10f9a0d5eaebcfa6e72bddcaf0b07a3a	d__Bacteria; p__Desulfobacterota; c__Desulfuromonadia; o__Geobacterales; f__Geobacteraceae; g__Geobacter
7147d4e8955e1bde6c559a720ab07dc7	d__Bacteria; p__Patescibacteria; c__Saccharimonadia; o__Saccharimonadales; f__Saccharimonadales; g__Saccharimonadales; s__uncultured_bacterium
13459543a625072833a41552ab925c0d	d__Bacteria; p__Planctomycetota; c__Planctomycetes; o__Pirellulales; f__Pirellulaceae; g__uncultured; s__uncultured_planctomycete
f28cef8ad75805a23a54d21355548d4e	d__Bacteria; p__Verrucomicrobiota; c__Verrucomicrobiae; o__Pedosphaerales; f__Pedosphaeraceae; g__Pedosphaeraceae
678bc55ac7e3e2956b315ca3641e9072	d__Archaea; p__Nanoarchaeota; c__Nanoarchaeia; o__Woesearchaeales; f__SCGC_AAA011-D5; g__SCGC_AAA011-D5; s__uncultured_archaeon
4bfc3d6f9c873fdd5e05fb9bc2df6fb3	d__Archaea; p__Halobacterota; c__Methanomicrobia; o__Methanomicrobiales; f__Methanomicrobiales; g__uncultured
c3b4e6c4407e989d68e3bc2d7354a4ee	d__Bacteria; p__Myxococcota; c__Polyangia; o__Haliangiales; f__Haliangiaceae; g__Haliangium
1dcd0423ad1e036127a61afe3d161023	d__Bacteria; p__Proteobacteria; c__Gammaproteobacteria; o__Burkholderiales; f__Nitrosomonadaceae; g__IS-44; s__metagenome
91e5acc45f22d7018b0b72cab3919146	d__Bacteria; p__Fibrobacterota; c__Fibrobacteria; o__Fibrobacterales; f__Fibrobacteraceae; g__uncultured; s__metagenome
b74a3c42b1053c6da234449ad4cb69f8	d__Bacteria; p__Acidobacteriota; c__Acidobacteriae; o__Solibacterales; f__Solibacteraceae; g__Candidatus_Solibacter
39e62c0805fd1bee185ae1b0cd662eb5	d__Bacteria; p__Chloroflexi; c__Dehalococcoidia; o__Dehalococcoidales; f__uncultured; g__uncultured; s__uncultured_bacterium
55fd1f6064235ae391755011d3590659	d__Bacteria; p__Proteobacteria; c__Alphaproteobacteria; o__Acetobacterales; f__Acetobacteraceae; g__Acidocella; s__uncultured_bacterium
11efbbb131b3a6ea36d79cbf1825df46	d__Bacteria; p__Bacteroidota; c__Bacteroidia; o__Bacteroidales; f__Prolixibacteraceae; g__BSV13; s__uncultured_bacterium
333ca8e401b1787ca630ceec2673f8a9	d__Bacteria; p__Bacteroidota; c__Bacteroidia; o__Bacteroidales
9c7ebbe96d263228028d5673dccb9404	d__Bacteria; p__Acidobacteriota; c__Acidobacteriae; o__Acidobacteriales; f__Acidobacteriaceae_(Subgroup_1); g__Acidobacteriaceae_(Subgroup_1); s__uncultured_bacterium
e9ae5b7b2584e6e74cc8b80e2c94863c	d__Bacteria; p__Bacteroidota; c__Bacteroidia; o__Bacteroidales; f__Prolixibacteraceae; g__BSV13; s__uncultured_bacterium
bdd8658bfc9d5eb68b897d83f974713b	d__Bacteria; p__Verrucomicrobiota; c__Verrucomicrobiae; o__Pedosphaerales; f__Pedosphaeraceae; g__Ellin516; s__uncultured_bacterium
f913180a0aa32fbcf342eb62fa2310d3	d__Archaea; p__Crenarchaeota; c__Nitrososphaeria; o__Group_1.1c; f__Group_1.1c; g__Group_1.1c; s__uncultured_archaeon
b490bb506a5680014b0382dc0cb5d582	d__Archaea; p__Crenarchaeota; c__Bathyarchaeia; o__Bathyarchaeia; f__Bathyarchaeia; g__Bathyarchaeia
70a6d2173060e487b0d1b8562ca1d893	d__Bacteria; p__Desulfobacterota; c__Syntrophia; o__Syntrophales; f__uncultured; g__uncultured; s__uncultured_bacterium
3e6a947f9714731d5b2e124e28969dd4	d__Bacteria; p__Patescibacteria; c__Parcubacteria; o__Candidatus_Nomurabacteria; f__Candidatus_Nomurabacteria; g__Candidatus_Nomurabacteria; s__uncultured_soil
22451853a0908e0231880e4926a65fef	d__Bacteria; p__Acidobacteriota; c__Acidobacteriae; o__Acidobacteriales; f__Acidobacteriaceae_(Subgroup_1)
462d7404096e8049302f0c395445e9ed	d__Bacteria; p__Proteobacteria; c__Gammaproteobacteria; o__Burkholderiales; f__Comamonadaceae
544e5bff34eb25e8546a6bd8504012b7	d__Bacteria; p__Patescibacteria; c__Parcubacteria; o__Parcubacteria; f__Parcubacteria; g__Parcubacteria; s__uncultured_bacterium
70d7e977f501daf067652f23e25b4593	d__Bacteria; p__Chloroflexi; c__KD4-96; o__KD4-96; f__KD4-96; g__KD4-96
56e0a019176bf46441d0f2124c09a2c0	d__Bacteria; p__Actinobacteriota; c__Thermoleophilia; o__Solirubrobacterales; f__Solirubrobacteraceae; g__Conexibacter; s__uncultured_Conexibacteraceae
771ee5d375030d260c9c776dc10a916b	Unassigned
efc9f29120e5e35e9380241d75913b13	d__Bacteria; p__Acidobacteriota; c__Acidobacteriae; o__Acidobacteriales; f__Acidobacteriaceae_(Subgroup_1); g__uncultured
007b486ecb90d1028adfe34948591a81	d__Bacteria; p__Proteobacteria; c__Alphaproteobacteria; o__Rhizobiales; f__Beijerinckiaceae; g__uncultured
ef89b377976c0bbaa4b9b7e8c5dd40e7	d__Bacteria; p__Verrucomicrobiota; c__Verrucomicrobiae; o__Pedosphaerales; f__Pedosphaeraceae; g__Pedosphaeraceae
152aae8241a8a2be8be6d8c5224cffaa	d__Bacteria; p__Patescibacteria; c__Berkelbacteria; o__Berkelbacteria; f__Berkelbacteria; g__Berkelbacteria; s__candidate_division
c0674b805210947fb91de156f8141191	d__Bacteria; p__Gemmatimonadota; c__Gemmatimonadetes; o__Gemmatimonadales; f__Gemmatimonadaceae; g__uncultured
ba19940c408603c3a9bc2dc64cae64c9	d__Bacteria; p__Actinobacteriota; c__Acidimicrobiia; o__IMCC26256; f__IMCC26256; g__IMCC26256
edab2073ad1065eedb8374a1993a79f0	d__Bacteria; p__Acidobacteriota; c__Acidobacteriae; o__Solibacterales; f__Solibacteraceae; g__Candidatus_Solibacter
c92d666ff534f8156db8c1c6df2eed8d	d__Bacteria; p__Bacteroidota; c__Bacteroidia; o__Bacteroidales; f__Prolixibacteraceae; g__WCHB1-32; s__uncultured_Prolixibacter
b39bc2406219066c8c6c7e247099dd11	d__Bacteria; p__Verrucomicrobiota; c__Verrucomicrobiae; o__Opitutales; f__Opitutaceae; g__uncultured; s__uncultured_bacterium
7a0af299aaf897908e602243b861556b	d__Bacteria; p__Bacteroidota; c__Bacteroidia; o__Bacteroidales; f__Paludibacteraceae; g__uncultured; s__marine_metagenome
77cd4017776c460a888370f877e3f44e	d__Bacteria; p__Bacteroidota; c__Bacteroidia; o__Sphingobacteriales; f__Lentimicrobiaceae; g__Lentimicrobiaceae; s__uncultured_bacterium
f1a4d86bdebccb27c998c049866755c1	d__Bacteria; p__Myxococcota; c__Polyangia; o__Haliangiales; f__Haliangiaceae; g__Haliangium; s__uncultured_proteobacterium
b20542b38bd639ab06945ebcbac36c4c	d__Bacteria; p__Acidobacteriota; c__Acidobacteriae; o__Solibacterales; f__Solibacteraceae; g__Candidatus_Solibacter
a9887e20a9c88d1d73fe899e69eeb075	d__Bacteria; p__Spirochaetota; c__Spirochaetia; o__Spirochaetales; f__Spirochaetaceae; g__uncultured; s__uncultured_bacterium
0f48b96e116e0f386ef2cb26f1ebde49	d__Bacteria; p__Planctomycetota; c__Planctomycetes; o__Pirellulales; f__Pirellulaceae; g__Pir1_lineage
a3a1c2bd8d9662254068e596dc393bfe	d__Bacteria; p__Proteobacteria; c__Alphaproteobacteria; o__Rhizobiales; f__Methyloligellaceae; g__uncultured; s__metagenome
9fb07d55dd5daf662e0d3ad5fa5eecc4	d__Bacteria; p__Planctomycetota; c__Phycisphaerae; o__Tepidisphaerales; f__CPla-3_termite_group; g__CPla-3_termite_group; s__uncultured_bacterium
4745122eea76874aef733eb8308e4008	d__Bacteria; p__Bacteroidota; c__Bacteroidia; o__Bacteroidales; f__Paludibacteraceae; g__uncultured; s__marine_metagenome
97b4c207c18d921466157466f1f5fe8e	d__Bacteria; p__Armatimonadota; c__Fimbriimonadia; o__Fimbriimonadales; f__Fimbriimonadaceae; g__Fimbriimonas
0081e2ebe4c4d3f61ee42e8f9712732b	d__Bacteria; p__Armatimonadota; c__Fimbriimonadia; o__Fimbriimonadales; f__Fimbriimonadaceae; g__Fimbriimonadaceae; s__uncultured_bacterium
3fedc961405ca2e81c6fd2de2c2b083a	Unassigned
8a3095676cd8d32289d6dc64376e5675	d__Bacteria; p__Nitrospirota; c__Thermodesulfovibrionia; o__uncultured; f__uncultured; g__uncultured
85462189be98473c732686fa7e5882f9	d__Bacteria; p__Chloroflexi; c__Dehalococcoidia; o__vadinBA26; f__vadinBA26; g__vadinBA26; s__uncultured_Dehalococcoidia
0fba9b8fa6f4907b59a29132937c1a4e	d__Bacteria; p__Methylomirabilota; c__Methylomirabilia; o__Methylomirabilales; f__Methylomirabilaceae; g__Sh765B-TzT-35; s__uncultured_bacterium
8cc89ae4be0c37aa8bf5d5fc59911189	d__Bacteria; p__Acidobacteriota; c__Acidobacteriae; o__Acidobacteriales; f__Acidobacteriaceae_(Subgroup_1); g__Acidipila; s__uncultured_bacterium
3c296e2b08a23e77b96ded12edec504b	d__Bacteria; p__Actinobacteriota; c__Actinobacteria; o__Frankiales; f__Acidothermaceae; g__Acidothermus
b74bec8ac944a334e58b45472b65063e	d__Bacteria; p__Actinobacteriota; c__Thermoleophilia; o__Gaiellales; f__uncultured; g__uncultured; s__uncultured_Solirubrobacterales
370e509f1af251fa7d9d683642ec4965	d__Bacteria; p__Proteobacteria; c__Alphaproteobacteria; o__Rhizobiales; f__Xanthobacteraceae; g__Bradyrhizobium
d78554865111c0568f01c210b6ff6274	d__Bacteria; p__Proteobacteria; c__Gammaproteobacteria; o__JG36-TzT-191; f__JG36-TzT-191; g__JG36-TzT-191; s__uncultured_bacterium
705600519858f7eface7ddc60d300e4e	d__Bacteria; p__Patescibacteria; c__Saccharimonadia; o__Saccharimonadales; f__Saccharimonadales; g__Saccharimonadales; s__uncultured_bacterium
a2605e585acefb39c510f1a322fe54a9	d__Bacteria; p__Caldisericota; c__Caldisericia; o__Caldisericales; f__Caldisericaceae; g__Caldisericum
bb63f4d523eef942257d741a09a819d2	d__Bacteria; p__Patescibacteria; c__Saccharimonadia; o__Saccharimonadales; f__Saccharimonadales; g__Saccharimonadales; s__uncultured_bacterium
b3ab6a7cd0c1ada7b1045db63643e569	d__Bacteria; p__Acidobacteriota; c__Acidobacteriae; o__Subgroup_2; f__Subgroup_2; g__Subgroup_2; s__uncultured_Holophaga
11c4773eb4f34744e566859f1ef8f3a9	d__Bacteria; p__Acidobacteriota; c__Acidobacteriae; o__Acidobacteriae; f__Acidobacteriae; g__Paludibaculum; s__uncultured_Acidobacteria
163781511c0d06830889965addafc7f2	d__Bacteria; p__Proteobacteria; c__Gammaproteobacteria; o__Burkholderiales; f__Methylophilaceae
c61953e8c47c9706ac3816c56fb6bf48	d__Bacteria; p__Sumerlaeota; c__Sumerlaeia; o__Sumerlaeales; f__Sumerlaeaceae; g__Sumerlaea
a5c8e64010d7002caf174585b2bccfa0	d__Bacteria; p__Proteobacteria; c__Alphaproteobacteria; o__Elsterales; f__uncultured; g__uncultured; s__uncultured_forest
0224d1b553ed1c567382ff02645cd3a1	d__Bacteria; p__Chloroflexi; c__TK10; o__TK10; f__TK10; g__TK10
c660fcef9358c42fec8deff81952bab2	d__Bacteria; p__Chloroflexi; c__KD4-96; o__KD4-96; f__KD4-96; g__KD4-96; s__uncultured_Anaerolineaceae
5b816fdcc83bc7b27f978a3151db3292	d__Bacteria; p__Acidobacteriota; c__Acidobacteriae; o__Solibacterales; f__Solibacteraceae; g__Candidatus_Solibacter
007becb645ca05b8e16af6c2fc57ad45	d__Bacteria; p__Actinobacteriota; c__Actinobacteria; o__Corynebacteriales; f__Mycobacteriaceae; g__Mycobacterium
287f21bf5ec87c4bb26b24ceda4f963d	d__Bacteria; p__Acidobacteriota; c__Acidobacteriae; o__Acidobacteriales; f__Acidobacteriaceae_(Subgroup_1); g__Granulicella
ec4ea1814136c4f8c69af916670001f0	d__Bacteria; p__Proteobacteria; c__Alphaproteobacteria; o__Rhizobiales; f__Xanthobacteraceae; g__uncultured
a46b27d38d0b86a09b109f56528c74ea	d__Bacteria; p__Acidobacteriota; c__Acidobacteriae; o__Solibacterales; f__Solibacteraceae; g__Candidatus_Solibacter; s__uncultured_Acidobacteria
ab0ed0d10fb76164576453edc9d5dca5	d__Bacteria; p__Proteobacteria; c__Alphaproteobacteria; o__Micropepsales; f__Micropepsaceae; g__uncultured
76e12c753616791f9c948e953166b316	d__Bacteria; p__Patescibacteria; c__Berkelbacteria; o__Berkelbacteria; f__Berkelbacteria; g__Berkelbacteria; s__uncultured_bacterium
54cf18ef56bc5520c74e98327e1d8231	d__Bacteria; p__Chloroflexi; c__KD4-96; o__KD4-96; f__KD4-96; g__KD4-96
2bc0553ce3fa6c99147f7cf398e0c9e4	d__Bacteria; p__Planctomycetota; c__Planctomycetes; o__Pirellulales; f__Pirellulaceae; g__uncultured; s__uncultured_planctomycete
45e230348c6cef433cb35869efd88a29	d__Bacteria; p__Caldisericota; c__Caldisericia; o__Caldisericales; f__Caldisericaceae; g__Caldisericum; s__uncultured_eubacterium
b132bc968e86316f4bef212d113174f2	d__Bacteria; p__Acidobacteriota; c__Acidobacteriae; o__Bryobacterales; f__Bryobacteraceae; g__Bryobacter; s__uncultured_soil
f661a01d11d651ae844e2da0c5298f97	d__Bacteria; p__Proteobacteria; c__Gammaproteobacteria; o__WD260; f__WD260; g__WD260; s__uncultured_bacterium
e7c5b2b9dc2705896507773561dd9f5c	d__Bacteria; p__Firmicutes; c__Clostridia; o__Clostridiales; f__Clostridiaceae; g__Clostridium_sensu_stricto_13; s__Clostridium_estertheticum
3e111b1737542b37bcb73cd518add174	d__Bacteria; p__Firmicutes; c__Clostridia; o__Clostridia; f__Hungateiclostridiaceae
cf5fad22ed41b26c98091eff0adc3cad	d__Archaea; p__Halobacterota; c__Methanomicrobia; o__Methanomicrobiales
250e4f40ec404160435732293778a9b9	d__Bacteria; p__Patescibacteria; c__Microgenomatia; o__Candidatus_Shapirobacteria; f__Candidatus_Shapirobacteria; g__Candidatus_Shapirobacteria
2da04dfd20a23d0d33a197f513e3187b	d__Bacteria; p__Chloroflexi; c__TK10; o__TK10; f__TK10; g__TK10
f741632507e5c6e60528d536aadb5393	d__Bacteria; p__Planctomycetota; c__Planctomycetes; o__Pirellulales; f__Pirellulaceae; g__uncultured; s__uncultured_Planctomycetaceae
f46fd41d846cc7bf9101c864f52e609e	d__Bacteria; p__Acidobacteriota; c__Holophagae; o__Subgroup_7; f__Subgroup_7; g__Subgroup_7; s__uncultured_Thermaerobacter
5d382c8c23eece037577e4ea18b70d32	d__Bacteria; p__Acidobacteriota; c__Acidobacteriae; o__Acidobacteriales; f__Acidobacteriaceae_(Subgroup_1)
ed0f5981d1cbd86fbd032a3c6cd1a608	d__Bacteria
0ca1e0882c8fc764e947b7a5f826eb1d	d__Bacteria; p__Bacteroidota; c__Ignavibacteria; o__Ignavibacteriales; f__Ignavibacteriaceae; g__Ignavibacterium; s__uncultured_bacterium
63f59aeeb785707d0249a398f019346a	d__Bacteria; p__Acidobacteriota; c__Acidobacteriae; o__Acidobacteriales; f__uncultured; g__uncultured
0b6119716f7175f889877eb3f1495b8c	d__Bacteria; p__Planctomycetota; c__Planctomycetes; o__Isosphaerales; f__Isosphaeraceae; g__Candidatus_Nostocoida; s__uncultured_planctomycete
2cc5aef3a330e2f7008eef7eab7b3a09	d__Bacteria; p__Acidobacteriota; c__Acidobacteriae; o__Acidobacteriales; f__uncultured; g__uncultured
596ea491142927aa04b64b01ca620a31	d__Bacteria; p__Bacteroidota; c__Bacteroidia; o__Bacteroidales; f__Paludibacteraceae; g__uncultured; s__marine_metagenome
117f61349f17532ee4158e9ca071665f	d__Bacteria; p__Firmicutes; c__Bacilli; o__Erysipelotrichales; f__Erysipelatoclostridiaceae; g__UCG-004; s__uncultured_bacterium
a92ff3b27aa3d1315d3211d8b300df5a	d__Archaea; p__Halobacterota; c__Methanomicrobia; o__Methanomicrobiales; f__Methanoregulaceae; g__Methanoregula
cca96205c7e7004e44b88e890219efb3	d__Bacteria; p__Proteobacteria; c__Gammaproteobacteria; o__Burkholderiales; f__Methylophilaceae
ccf3de5922c3b66f5ad138f8b2e24679	d__Bacteria; p__Gemmatimonadota; c__Gemmatimonadetes; o__Gemmatimonadales; f__Gemmatimonadaceae; g__Gemmatimonas; s__uncultured_bacterium
c02b50944ecd626242f3d5bb4af94389	d__Bacteria; p__Chloroflexi; c__Anaerolineae; o__Anaerolineales; f__Anaerolineaceae; g__Leptolinea; s__uncultured_bacterium
2c9d4156f8f789364c981b6e56f7dc9b	d__Bacteria; p__Bacteroidota; c__Bacteroidia; o__Bacteroidales; f__Prevotellaceae; g__Prevotella
8ed8d9f4d2f3bc577ab232d9846d109c	d__Bacteria; p__Acidobacteriota; c__Acidobacteriae; o__Solibacterales; f__Solibacteraceae; g__Candidatus_Solibacter
3012947d52982d578b57de17f2a68a35	d__Bacteria; p__Planctomycetota; c__Planctomycetes; o__Planctomycetales; f__Schlesneriaceae; g__Schlesneria; s__uncultured_planctomycete
42f2e0ca6f18d2c32e71f56cde9cc090	d__Bacteria; p__Bacteroidota; c__Bacteroidia; o__Bacteroidales
fbc9ea63e38a66a63d462a9807c618dc	d__Eukaryota; p__Nematozoa; c__Chromadorea; o__Rhabditida; f__Rhabditida; g__Rhabditida; s__Teratocephalus_lirellus
07ca3382a64aff60c224197330004c44	d__Bacteria; p__Bacteroidota; c__Bacteroidia; o__Bacteroidales
28a2ddd1e269513d04d6d6959c487828	d__Bacteria; p__Firmicutes; c__Clostridia; o__Christensenellales; f__Christensenellaceae; g__uncultured; s__uncultured_bacterium
d9b88b5615c5f37df92443881fac4b8c	d__Bacteria; p__Proteobacteria; c__Gammaproteobacteria; o__Burkholderiales; f__TRA3-20; g__TRA3-20; s__metagenome
001ad111a11f8605876112b58a116f2c	d__Eukaryota; p__Phragmoplastophyta; c__Embryophyta
9c4f08d53a1ec73dcbfd64bc12c05019	d__Bacteria; p__Acidobacteriota; c__Acidobacteriae; o__Subgroup_2; f__Subgroup_2; g__Subgroup_2; s__uncultured_Acidobacteria
d954523be19dfed8a3ebc72be601fe93	d__Bacteria; p__Desulfobacterota; c__Desulfuromonadia; o__Geobacterales; f__Geobacteraceae; g__Citrifermentans; s__uncultured_Geobacteraceae
600019ee54e70212362a04d5b80097ab	d__Bacteria; p__Proteobacteria; c__Gammaproteobacteria; o__WD260; f__WD260; g__WD260
b2a9c25aa3a29e3905d775657ff3ee12	d__Bacteria; p__Verrucomicrobiota; c__Verrucomicrobiae; o__Pedosphaerales; f__Pedosphaeraceae; g__Ellin516; s__uncultured_bacterium
22427fb49e84d4b681db8b015ad5229d	d__Bacteria; p__Proteobacteria; c__Alphaproteobacteria; o__Acetobacterales; f__Acetobacteraceae; g__Kozakia; s__Kozakia_baliensis
354e2550ea64afe66872f9ff3f1a5863	d__Bacteria; p__Acidobacteriota; c__Acidobacteriae; o__Subgroup_2; f__Subgroup_2; g__Subgroup_2; s__uncultured_Acidobacteria
2684ab4083b08279303978a44f8b9875	d__Bacteria; p__Acidobacteriota; c__Acidobacteriae; o__Acidobacteriales; f__Acidobacteriaceae_(Subgroup_1); g__Occallatibacter
4ca55d1bcd8339222a5a7c4e197dd7b4	d__Bacteria; p__Planctomycetota; c__Phycisphaerae; o__Tepidisphaerales; f__WD2101_soil_group; g__WD2101_soil_group
aa64da954c72738a0f0ffd851542b1d5	d__Bacteria; p__Proteobacteria; c__Gammaproteobacteria; o__Burkholderiales; f__Comamonadaceae; g__Acidovorax
a7a1dacdcb451e39da024aedaa6e48f7	d__Bacteria; p__Acidobacteriota; c__Acidobacteriae; o__Solibacterales; f__Solibacteraceae; g__Candidatus_Solibacter
871f010c93889b8e5b69cd5c05a00919	d__Bacteria; p__Acidobacteriota; c__Acidobacteriae; o__Bryobacterales; f__Bryobacteraceae; g__Bryobacter
d0be0af4de58a92a49bffee70fd2daa5	d__Bacteria; p__Acidobacteriota; c__Acidobacteriae; o__Subgroup_2; f__Subgroup_2; g__Subgroup_2
8857243eaa454dcc8a43ca67cf79481b	Unassigned
1c18488f0b7efe8cc324742de23a15a6	d__Bacteria; p__Firmicutes; c__Clostridia; o__Oscillospirales; f__[Eubacterium]_coprostanoligenes_group; g__[Eubacterium]_coprostanoligenes_group
b5475f31b7823bad86c7cb8bf47713a6	d__Bacteria; p__Actinobacteriota; c__Thermoleophilia; o__Gaiellales; f__uncultured; g__uncultured; s__uncultured_actinobacterium
c06c70d58e0f08d825e314064e5fa04f	d__Bacteria; p__Proteobacteria; c__Gammaproteobacteria; o__Burkholderiales; f__Gallionellaceae
85c167636234ec77e3e24ea045ad783e	d__Eukaryota; p__Phragmoplastophyta; c__Embryophyta; o__Magnoliophyta; f__Magnoliophyta; g__Magnoliophyta
48b58d474de099648c568cc93b2e0cb9	d__Bacteria; p__Proteobacteria; c__Gammaproteobacteria; o__Burkholderiales; f__Chromobacteriaceae; g__Paludibacterium
edb5ee4bfc9926f1eb8c1ec92ecdf25f	d__Bacteria; p__Acidobacteriota; c__Acidobacteriae; o__Acidobacteriales; f__Acidobacteriaceae_(Subgroup_1); g__Occallatibacter
7ac0a21fe24aee8d86c64d5ff8257384	d__Bacteria; p__Patescibacteria; c__Microgenomatia; o__Candidatus_Shapirobacteria; f__Candidatus_Shapirobacteria; g__Candidatus_Shapirobacteria; s__uncultured_anaerobic
e4dfe89f1cf8336bbd638eb0f303bdcd	d__Bacteria; p__Chloroflexi; c__Dehalococcoidia; o__RBG-13-46-9; f__RBG-13-46-9; g__RBG-13-46-9; s__uncultured_bacterium
417dfcb78832b1adca34f8142a08721d	d__Bacteria; p__Acidobacteriota; c__Vicinamibacteria; o__Vicinamibacterales; f__uncultured; g__uncultured
0ee9ccc45a3c66e1c4f3c986d2b4a722	d__Bacteria; p__Planctomycetota; c__Planctomycetes; o__Planctomycetales
484db5568b0309b1aae8bb2d057a9aee	d__Bacteria; p__Acidobacteriota; c__Vicinamibacteria; o__Vicinamibacterales; f__uncultured; g__uncultured; s__uncultured_Acidobacteriaceae
7636bd9ad86276f1397b1a532ed39335	d__Bacteria; p__Bacteroidota; c__Bacteroidia; o__Bacteroidales; f__Prevotellaceae; g__Prevotella
bb22ead703b265c67ea8f754f1504c25	d__Bacteria; p__Planctomycetota; c__Phycisphaerae; o__Tepidisphaerales; f__WD2101_soil_group; g__WD2101_soil_group
e9e147265468e14e1e5a378279bdff61	d__Bacteria; p__Actinobacteriota; c__Actinobacteria; o__Frankiales; f__Acidothermaceae; g__Acidothermus; s__uncultured_bacterium
7ac2528f8beb2b3644a4775bd3e16659	d__Bacteria; p__Bacteroidota; c__Bacteroidia; o__Bacteroidales; f__Dysgonomonadaceae; g__uncultured; s__uncultured_soil
bc72d258ef7392c21501abf99424b799	d__Bacteria; p__Planctomycetota; c__Phycisphaerae; o__Phycisphaerales; f__AKAU3564_sediment_group; g__AKAU3564_sediment_group; s__uncultured_organism
a1cc0973a3bf01d88cf6d10799ec5ab2	d__Bacteria; p__Patescibacteria; c__Saccharimonadia; o__Saccharimonadales; f__Saccharimonadales; g__Saccharimonadales; s__uncultured_bacterium
7dbdf832e12b0ff44f19c149d60441a3	d__Bacteria; p__Acidobacteriota; c__Holophagae; o__Subgroup_7; f__Subgroup_7; g__Subgroup_7; s__uncultured_Thermaerobacter
0d25c1eb1f820ed4c69362736950ffdf	d__Bacteria; p__Acidobacteriota; c__Vicinamibacteria; o__Vicinamibacterales; f__Vicinamibacteraceae; g__Vicinamibacteraceae
b92e717f087d15073a9412459e1aa95c	d__Bacteria; p__Armatimonadota; c__uncultured; o__uncultured; f__uncultured; g__uncultured; s__uncultured_bacterium
ef02b69bedac4214fa0ced83d83cc880	d__Bacteria; p__Proteobacteria; c__Alphaproteobacteria; o__Rhizobiales; f__Xanthobacteraceae; g__uncultured
8eea7c79611a044c7671621101d05863	d__Bacteria; p__Verrucomicrobiota; c__Verrucomicrobiae; o__Opitutales; f__Opitutaceae; g__uncultured; s__uncultured_bacterium
d07fb4de53d2e4b08b39864269c37627	d__Bacteria; p__Patescibacteria; c__Berkelbacteria; o__Berkelbacteria; f__Berkelbacteria; g__Berkelbacteria; s__uncultured_bacterium
2672dd190f0cf57ada6d66eaf54de64b	d__Bacteria; p__Proteobacteria; c__Alphaproteobacteria; o__Rhizobiales; f__Xanthobacteraceae; g__Pseudolabrys
d9995cb1069b95798a854aed3f5c5fdf	d__Bacteria; p__Proteobacteria; c__Gammaproteobacteria; o__Burkholderiales; f__A21b; g__A21b; s__uncultured_bacterium
cd5700f3b7ca81a94ceaa166c6dcebd9	d__Eukaryota; p__Chlorophyta; c__Chlorophyceae; o__Chlorophyceae; f__Chlorophyceae; g__Chlorophyceae; s__Chlorogonium_elongatum
1cfc4b7fdf41a469d9d396470c3f0836	d__Archaea; p__Crenarchaeota; c__Bathyarchaeia; o__Bathyarchaeia; f__Bathyarchaeia; g__Bathyarchaeia
debbf3287f0bd6611fcdbc2837f7efb1	d__Bacteria; p__Acidobacteriota; c__Acidobacteriae; o__Acidobacteriales; f__Acidobacteriaceae_(Subgroup_1); g__Occallatibacter
ec9cb1a4b11b94400767b22a708265b5	d__Bacteria; p__Patescibacteria; c__Parcubacteria; o__Candidatus_Kaiserbacteria; f__Candidatus_Kaiserbacteria; g__Candidatus_Kaiserbacteria; s__uncultured_Parcubacteria
409a3652a6e71f2e83feb7b57e66320c	d__Bacteria; p__Verrucomicrobiota; c__Omnitrophia; o__Omnitrophales; f__Omnitrophaceae; g__Candidatus_Omnitrophus
a5f276929548ac4165261aff72851fa4	d__Bacteria; p__Verrucomicrobiota; c__Verrucomicrobiae; o__Opitutales; f__Opitutaceae; g__Lacunisphaera; s__metagenome
e02acbdd6be2a61657ab190159be99b7	Unassigned
236fef741e5576fad6cb5e0f9a9d86ce	d__Bacteria; p__Fibrobacterota; c__Fibrobacteria; o__Fibrobacterales; f__B122; g__B122; s__uncultured_bacterium
8d1500e5bfe0913d7981f698e7fcf4a4	d__Bacteria; p__Firmicutes; c__Bacilli; o__Erysipelotrichales; f__Erysipelatoclostridiaceae; g__UCG-004; s__uncultured_bacterium
7d0551ef1b2653a6ac795751ed2422eb	d__Bacteria; p__Actinobacteriota; c__Thermoleophilia; o__Solirubrobacterales; f__Solirubrobacteraceae; g__Conexibacter
d640d13dfff4d6574e4bea64bf2ff9d2	d__Eukaryota; p__Phragmoplastophyta; c__Embryophyta
6bf897ac5e3a17eb2abb730414f71ecf	d__Bacteria; p__Firmicutes; c__Clostridia; o__Oscillospirales; f__[Eubacterium]_coprostanoligenes_group; g__[Eubacterium]_coprostanoligenes_group
ef8860c9814a01c31e7a19c630775601	d__Bacteria; p__Proteobacteria; c__Alphaproteobacteria; o__Rhizobiales; f__Xanthobacteraceae; g__Bradyrhizobium
[truncated: 25,632 more rows]
