# Supplementary material for: Impact of storage and extraction methods on peat soil microbiomes
Source: PeerJ journal article supplement (doi:10.7717/peerj.18745), 2024-12-23
Supplement: TableS6.xlsx [file TableS6.xlsx]

## Sheet: Sheet1
Table S6: List of methanogenic taxa
Genus	Species	Publication
Methanosaeta	concilii	G. Patel et al., 1990, Int. J. Syst. Bacteriol., vol. 40, p. 79
Methanosaeta	harundinacea	K. Ma et al., 2006, Int. J. Syst. Evol. Microbiol., vol. 56, p. 127
Methanosaeta	pelagica	K. Mori et al., 2012, Appl. Environ. Microbiol., vol. 78, p. 3416
Methanosaeta	thermophila	G. Patel et al., 1990, Int. J. Syst. Bacteriol., vol. 40, p. 79
Methanosarcina	acetivorans	K. Sowers et al., 1983, Appl. Environ. Microbiol., vol. 47, p. 971
Methanosarcina	barkeri	M. Bryant et al., 1987, Int. J. Syst. Bacteriol., vol. 37, p. 169
Methanosarcina	horonobensis	S. Shimizu et al., 2011, Int. J. Syst. Evol. Microbiol., vol. 61, p. 2503
Methanosarcina	mazei	R. Mah, 1980, Curr. Microbiol., vol. 3, p. 321
Methanosarcina	soligelidi	D. Wagner et al., 2013, Int. J. Syst. Evol. Microbiol., vol. 63, p. 2986
Methanosarcina	spelaei	L. Ganzert et al, 2014, Int J Syst Evol Microbiol, Vol. 64, P. 3478-3484
Methanosarcina	thermophila	S. Zinder et al., 1979, Appl. Environ. Microbiol., vol. 38, p. 996
Methanosarcina	vacuolata	T. Zhilina et al., 1987, Int. J. Syst. Bacteriol., vol. 37, p. 281
Methanosarcina	flavescens	T. Kern et al., 2016. Int J Syst Evol Microbiol vol. 66 p. 1533
Methanobacterium	aarhusense	A.Shlimon et al., 2004, Int. J. Syst. Evol. Microbiol., vol. 54, p. 759
Methanobacterium	alcaliphilum	S. Worakit et al., 1986, Int. J. Syst. Bacteriol., vol. 36, p. 380
Methanobacterium	arcticum	V. Shcherbakova et al., 2011, Int. J. Syst. Evol. Microbiol., vol. 61, p. 144
Methanobacterium	beijingense	K. Ma et al., 2005, Int. J. Syst. Evol. Microbiol., vol. 55, p. 325
Methanobacterium	congolense	N. Cuzin et al., 2001, Int. J. Syst. Evol. Microbiol., vol. 51, p. 489
Methanobacterium	espanolae	G. Patel et al., 1990, Int. J. Syst. Bacteriol., vol. 40, p. 12
Methanobacterium	ferruginis	K. Mori et al., 2011, Int. J. Syst. Evol. Microbiol., vol. 61, p. 138
Methanobacterium	flexile	J. Zhu et al., 2011, Int. J. Syst. Evol. Microbiol., vol. 61, p. 2974
Methanobacterium	lacus	G. Borrel et al., 2012, Int. J. Syst. Evol. Microbiol., vol. 62, p. 1625
Methanobacterium	movens	J. Zhu et al., 2011, Int. J. Syst. Evol. Microbiol., vol. 61, p. 2974
Methanobacterium	movilense	J. Schirmack et al., 2014, Int. J. Syst. Evol. Microbiol., vol. 64, p. 522
Methanobacterium	oryzae	C. Joulian et al., 2000, Int. J. Syst. Evol. Microbiol., vol. 50, p. 525
Methanobacterium	palustre	G. Zellner et al., 1988, Arch. Microbiol., vol. 151, p. 1
Methanobacterium	petrolearium	K. Mori et al., 2011, Int. J. Syst. Evol. Microbiol., vol. 61, p. 138
Methanobacterium	subterraneum	S. Kotelnikova et al., 1998, Int. J. Syst. Evol. Microbiol., vol. 48, p. 357
Methanobacterium	thermaggregans	K. Blotevogel et al., 1985, Arch. Microbiol., vol. 142, p. 218
Methanobacterium	veterum	K. Krivushin et al., 2010, Int. J. Syst. Evol. Microbiol., vol. 60, p. 455
Methanobrevibacter	acididurans	D. Savant et al., 2002, Int. J. Syst. Evol. Microbiol., vol. 52, p. 1081
Methanobrevibacter	arboriphilus	J. Zeikus et al., 1975, Antonie Van Leeuwenhoek, vol. 41, p. 543
Methanobrevibacter	curvatus	J. Leadbetter et al., 1996, Appl. Environ. Microbiol., vol. 62, p. 3620
Methanobrevibacter	cuticularis	J. Leadbetter et al., 1996, Appl. Environ. Microbiol., vol. 62, p. 3620
Methanobrevibacter	filiformis	J. Leadbetter et al., 1998, Arch. Microbiol., vol. 169, p. 287
Methanobrevibacter	gottschalkii	T. Miller et al., 2002, Int. J. Syst. Evol. Microbiol., vol. 52, p. 819
Methanobrevibacter	millerae	S. Rea et al., 2007, Int. J. Syst. Evol. Microbiol., vol. 57, p. 450
Methanobrevibacter	olleyae	S. Rea et al., 2007, Int. J. Syst. Evol. Microbiol., vol. 57, p. 450
Methanobrevibacter	oralis	A. Ferrari et al., 1994, Curr. Microbiol., vol. 29, p. 7
Methanobrevibacter	thaueri	T. Miller et al., 2002, Int. J. Syst. Evol. Microbiol., vol. 52, p. 819
Methanobrevibacter	woesei	T. Miller et al., 2002, Int. J. Syst. Evol. Microbiol., vol. 52, p. 819
Methanobrevibacter	wolinii	T. Miller et al., 2002, Int. J. Syst. Evol. Microbiol., vol. 52, p. 819
Methanocalculus	chunghsingensis	M. Lai et al., 2004, Int. J. Syst. Evol. Microbiol., vol. 54, p. 183
Methanocalculus	halotolerans	B. Ollivier et al., 1998, Int. J. Syst. Bacteriol., vol. 48, p. 823
Methanocalculus	natronophilus	T. Zhilina et al., 2014, Microbiology, vol. 82, p. 698
Methanocalculus	pumilus	K. Mori et al., 2000, Int. J. Syst. Evol. Microbiol., vol. 50, p. 1723
Methanocalculus	taiwanensis	M. Lai et al., 2002, Int. J. Syst. Evol. Microbiol., vol. 52, p. 1799
Methanocaldococcus	fervens	C. Jeanthon et al., 1999, Int. J. Syst. Bacteriol., vol. 49, p. 583
Methanocaldococcus	indicus	S. L Haridon et al., 2003, Int. J. Syst. Evol. Microbiol., vol. 53, p.1931
Methanocaldococcus	infernus	C. Jeanthon et al., 1998, Int. J. Syst. Bacteriol., vol. 48, p. 913
Methanocaldococcus	jannaschii	W. Jones, et al., 1983, Arch. Microbiol., vol. 136, p. 254
Methanocaldococcus	villosus	A. Bellack et al., 2011, Int. J. Syst. Evol. Microbiol., vol. 61, p.1239
Methanocaldococcus	vulcanius	C. Jeanthon et al., 1999, Int. J. Syst. Bacteriol., vol. 49, p. 583
Methanocella	arvoryzae	S. Sakai et al., 2010, Int. J. Syst. Evol. Microbiol., vol. 60, p. 2918
Methanocella	conradii	Z. Lu et al., 2012, J. Bacteriol., vol. 194, p. 2398
Methanocella	paludicola	S. Sakai et al., 2008, Int. J. Syst. Evol. Microbiol., vol. 58, p. 929
Methanococcus	aeolicus	M. Kendall et al., 2006, Int. J. Syst. Evol. Microbiol., vol. 57, p. 1525
Methanococcus	maripaludis	W. Jones et al., 1983, Arch. Microbiol., vol. 135, p. 91
Methanococcus	voltae	W. Belch et al., 1989, Int. J. Syst. Bacteriol., vol. 39, p. 493
Methanocorpusculum	aggregans	B. Ollivier et al., 1985, Int. J. Syst. Bacteriol., vol. 35, p. 127
Methanocorpusculum	bavaricum	G. Zellner et al., 1989, Arch. Microbiol., vol. 151, p. 381
Methanocorpusculum	labreanum	Y. Zhao et al., 1989, Int. J. Syst. Evol. Microbiol., vol. 39, p. 10
Methanocorpusculum	parvum	G. Zellner et al., 1987, Arch. Microbiol., vol. 147, p. 13
Methanocorpusculum	sinense	G. Zellner et al., 1989, Arch. Microbiol., vol. 151, p. 381
Methanoculleus	bourgensis	B. Ollivier et al., 1986, Int. J. Syst. Bacteriol., vol. 36, p. 297
Methanoculleus	chikugoensis	D. Dianou et al., 2001, Int. J. Syst. Evol. Microbiol., vol. 51, p. 1663
Methanoculleus	horonobensis	S. Shimizu et al., 2013, Int. J. Syst. Evol. Microbiol., vol. 63, p. 4320
Methanoculleus	hydrogenitrophicus	J. Tian et al., Int. J. Syst. Evol. Microbiol., vol. 60, p. 2165
Methanoculleus	marisnigri	J. Romesser et al., 1979, Arch. Microbiol., vol. 121, p. 147
Methanoculleus	palmolei	G. Zellner et al., 1998, Int. J. Syst. Bacteriol., vol. 48, p. 1111
Methanoculleus	receptaculi	L. Cheng et al., 2008, FEMS Microbiol. Lett., vol. 285, p. 65
Methanoculleus	sediminis	Sheng-Chung Chen et al., 2015, Int. J. Syst. Evol. Microbiol., vol. 65, p. 2141–2147
Methanoculleus	submarinus	J. Mikucki et al., 2003, Appl. Environ. Microbiol., vol. 69, p. 3311
Methanoculleus	thermophilus	C. Rivard et al., 1982, Int. J. Syst. Bacteriol., vol. 32, p. 430
Methanofollis	aquaemaris	M. Lai et al., 2001, Int. J. Syst. Evol. Microbiol., vol. 51, p. 1873
Methanofollis	ethanolicus	H. Imachi et al., 2009, Int. J. Syst. Evol. Microbiol., vol. 59, p. 800
Methanofollis	formosanus	S. Wu et al., 2005, Int. J. Syst. Evol. Microbiol., vol. 55, p. 837
Methanofollis	liminatans	G. Zellner et al., 1990, Arch. Microbiol., vol. 153, p. 287
Methanofollis	tationis	H. Zabel et al., 1984, Arch. Microbiol., vol. 37, p. 308
Methanogenium	boonei	M. Kendall et al., 2007, Appl. Environ. Microbiol., vol. 73, p. 407
Methanogenium	cariaci	J. Romesser et al., 1979, Arch. Microbiol., vol. 121, p. 147
Methanogenium	frigidum	P. Franzmann et al., 1997, Int. J. Syst. Bacteriol., vol. 47, p. 1068
Methanogenium	marinum	S. Chong et al., 2002, Antonie Van Leeuwenhoek, vol. 81, p. 263
Methanogenium	organophilum	F. Widdel et al., 1988, Arch. Microbiol., vol. 150, p. 477
Methanolacinia	paynteri	C. Rivard et al., 1983, Appl. Environ. Microbiol., vol. 46, p. 484
Methanolinea	tarda	H. Imachi et al., 2008, Int. J. Syst. Evol. Microbiol., vol. 58, p. 294
Methanomicrobium	mobile	M. Paynter et al., 1968, J. Bacteriol., vol. 95, p. 1943
Methanoplanus	endosymbiosus	J. van Bruggen et al., 1986, Arch. Microbiol., vol. 144, p. 367
Methanoplanus	limicola	G. Wildgruber et al., 1982, Arch. Microbiol., vol. 132, p. 31
Methanoplanus	petrolearius	B. Ollivier et al., 1997, FEMS Microbiol. Lett., vol. 147, p. 51
Methanopyrus	kandleri	M. Kurr et al., 1991, Arch. Microbiol., vol. 156, p. 239
Methanoregula	boonei	S. Brauer et al., 2011, Int. J. Syst. Evol. Microbiol., vol. 61, p. 45
Methanoregula	formicica	Y. Yashiro et al., 2011, Int. J. Syst. Evol. Microbiol., vol. 61, p. 53
Methanosphaerula	palustris	H. Cadillo-Quiroz et al., 2009, Int. J. Syst. Evol. Microbiol., vol. 59, p. 928
Methanospirillum	hungatei	J. Ferry et al., 1974, Int. J. Syst. Bacteriol., vol. 24, p. 465
Methanospirillum	lacunae	T. Iino et al., 2010, Int. J. Syst. Evol. Microbiol., vol. 60, p. 2563
Methanothermobacter	crinale	L. Cheng et al., 2008, Appl. Environ. Microbiol., vol. 77, p. 5212
Methanothermobacter	tenebrarum	K. Nakamura et al., 2013, Int. J. Syst. Evol. Microbiol., vol. 63, p. 715
Methanothermobacter	thermautotrophicus	J. Zeikus et al., 1972, J. Bacteriol., vol. 109, p. 707
Methanothermobacter	wolfeii	J. Winter et al., 2000, Int. J. Syst. Evol. Microbiol., vol. 50, p. 43
Methanothermococcus	okinawensis	K. Takai et al., 2002, Int. J. Syst. Evol. Microbiol., vol. 52, p. 1089
Methanothermus	fervidus	K. Stetter et al., 1981, Zentralbl. Mikrobiol., vol. 178, p. 166
Methanotorris	formicicus	K. Takai et al., 2004, Int. J. Syst. Evol. Microbiol., vol. 54, p. 1095
Methanothermococcus	thermolithotrophicus	Evans et al., 2019 Nat. Rev. Microbiol., vol. 17, p 219-232
Methanotorris	igneus	Evans et al., 2019 Nat. Rev. Microbiol., vol. 17, p 219-233
Methanobacterium	formicicium	Evans et al., 2019 Nat. Rev. Microbiol., vol. 17, p 219-234
Methanoflorens	stordalenmirensis	Evans et al., 2019 Nat. Rev. Microbiol., vol. 17, p 219-235
Methermicoccus	shengliensis	Evans et al., 2019 Nat. Rev. Microbiol., vol. 17, p 219-236
