# Supplementary material for: Impact of storage and extraction methods on peat soil microbiomes
Source: PeerJ journal article supplement (doi:10.7717/peerj.18745), 2024-12-23
Supplement: TableS7.xlsx [file TableS7.xlsx]

## Sheet: Table S6
Table S7: Storage Comparisons - Adonis and Beta Dispersion Tests
Adonis2 (PERMANOVA) and beta dispersion tests for differences between the three storage conditions per each habitat and depth. Statistical significance was evaluated through a Benjamini-Hochberg correction (“Adjusted Adonis p-value” column) for multiple testing. Bold denotes significance (p < 0.05) based on the adjusted adonis p-value.
Habitat	Depth	Raw adonis p-value	Adjusted adonis p-value	R2	Beta Dispersion p-value
E	10-14	0.3846	0.3846	0.256	0.9996
P	10-14	0.007992	0.04795	0.303	0.1943
S	10-14	0.1	0.12	0.278	0.03451
E	30-34	0.03596	0.07193	0.311	0.1903
P	30-34	0.03397	0.07193	0.308	0.04918
S	30-34	0.1	0.12	0.261	0.4557
