# Supplementary material for: Impact of storage and extraction methods on peat soil microbiomes
Source: PeerJ journal article supplement (doi:10.7717/peerj.18745), 2024-12-23
Supplement: TableS8.xlsx [file TableS8.xlsx]

## Sheet: Table S7
Table S8: Extraction Comparisons with RC - Adonis and Beta Dispersion Tests
Adonis2 (PERMANOVA) and beta dispersion tests on Bray-Curtis distances testing for differences between the five extraction protocols per each habitat and depth with RC (PowerSoil RNA Isolation kit with DNA elution accessory kit) Statistical significance was evaluated through a Benjamini-Hochberg p-value correction for multiple testing (“Adjusted Adonis p-value” column), where bolded rows indicate…
Habitat	Depth	Raw adonis p-value	Adjusted adonis p-value	R2	Beta Dispersion p-value
E	10-14	0.000999	0.001499	0.457	0.7267
P	10-14	0.000999	0.001499	0.424	0.4503
S	10-14	0.000999	0.001499	0.506	0.5322
E	30-34	0.001998	0.002398	0.452	0.7
P	30-34	0.000999	0.001499	0.5	0.3387
S	30-34	0.002997	0.002997	0.455	0.6632
