# Supplementary material for: Impact of storage and extraction methods on peat soil microbiomes
Source: PeerJ journal article supplement (doi:10.7717/peerj.18745), 2024-12-23
Supplement: TableS10.xlsx [file TableS10.xlsx]

## Sheet: Table S9
Table S10: Unifrac Adonis2 Results for Extraction
Adonis2 (PERMANOVA) statistical results comparing the impact of habitat, depth, and extraction method on microbial community composition based on both Unweighted and Weighted UniFrac distances. The table presents Sum of Squares, R squared values, F values, and associated p-values for each factor and method of distance calculation.
Sum of Squares	R squared	F Value	p-value	Factor	Distance Method
1.96	0.41	198.59	0.001	Habitat	Weighted Unifrac
1.436	0.3	290.836	0.001	Depth	Weighted Unifrac
0.109	0.023	5.507	0.001	Extraction	Weighted Unifrac
4.52	0.253	33.026	0.001	Habitat	Unweighted Unifrac
3.382	0.19	49.413	0.001	Depth	Unweighted Unifrac
0.758	0.043	2.771	0.001	Extraction	Unweighted Unifrac
